# Supplementary material for: Construction and evaluation of a new rat reference genome assembly, GRCr8, from long reads and long-range scaffolding
Source: HighWire-hosted journal article supplement (doi:10.1101/gr.279292.124), 2024-11-01
Supplement: Supplemental_Table_S1.docx [file Supplemental_Table_S1.docx]

Supplemental Table S1

Novel coding genes identified in the GRCr8 assembly

#GeneID symbol gene_name mapping accession chr start stop strand/

689403 Vom2r65 "vomeronasal 2 receptor, 65" Unmapped NC_086019.1 1 " 637,388 " " 649,777 " +

134485288 LOC134485288 zinc finger protein 431-like Unmapped NC_086019.1 1 " 723,489 " " 730,316 " -

134484840 LOC134484840 vomeronasal type-2 receptor 116-like Unmapped NC_086019.1 1 " 1,011,671 " " 1,020,443 " +

134484845 LOC134484845 vomeronasal type-2 receptor 116-like Unmapped NC_086019.1 1 " 1,973,393 " " 1,982,220 " +

134484931 LOC134484931 zinc finger protein 431-like Unmapped NC_086019.1 1 " 2,227,010 " " 2,228,792 " -

134484932 LOC134484932 RNA-binding protein FXR1 Unmapped NC_086019.1 1 " 2,353,347 " " 2,355,477 " +

134485293 LOC134485293 zinc finger protein 433-like Unmapped NC_086019.1 1 " 2,461,111 " " 2,487,106 " -

134484937 LOC134484937 zinc finger protein 431-like Unmapped NC_086019.1 1 " 2,493,509 " " 2,516,840 " -

134482571 LOC134482571 uncharacterized LOC134482571 Novel NC_086019.1 1 " 2,685,145 " " 2,692,283 " -

134484947 LOC134484947 keratin-associated protein 5-1-like Novel NC_086019.1 1 " 9,349,181 " " 9,357,308 " -

134484954 LOC134484954 uncharacterized LOC134484954 Novel NC_086019.1 1 " 14,214,759 " " 14,217,509 " +

134484953 LOC134484953 uncharacterized LOC134484953 Novel NC_086019.1 1 " 14,217,415 " " 14,221,126 " +

134484962 LOC134484962 histidine-rich glycoprotein-like Novel NC_086019.1 1 " 17,243,313 " " 17,285,180 " -

134484852 LOC134484852 protein LEG1 homolog Novel NC_086019.1 1 " 18,051,959 " " 18,069,868 " -

134485273 LOC134485273 dynein axonemal assembly factor 8-like Novel NC_086019.1 1 " 30,889,134 " " 30,890,962 " -

134484986 LOC134484986 nidogen-2-like Unmapped NC_086019.1 1 " 38,717,481 " " 38,735,835 " -

134485001 LOC134485001 sperm motility kinase 3A-like Unmapped NC_086019.1 1 " 55,887,220 " " 55,895,964 " -

134485002 LOC134485002 sperm motility kinase Y-like Unmapped NC_086019.1 1 " 56,431,049 " " 56,436,098 " +

134478818 LOC134478818 sperm motility kinase Y-like Unmapped NC_086019.1 1 " 56,460,948 " " 56,465,188 " +

134482773 LOC134482773 sperm motility kinase 3A-like Unmapped NC_086019.1 1 " 56,642,305 " " 56,660,930 " -

134482784 LOC134482784 sperm motility kinase 3A-like Unmapped NC_086019.1 1 " 56,777,031 " " 56,785,733 " -

134482794 LOC134482794 sperm motility kinase 2B-like Unmapped NC_086019.1 1 " 56,877,745 " " 56,890,065 " -

134485004 LOC134485004 sperm motility kinase 2B-like Novel NC_086019.1 1 " 57,322,666 " " 57,331,805 " +

134485006 LOC134485006 sperm motility kinase 3A-like Unmapped NC_086019.1 1 " 57,473,669 " " 57,482,301 " +

134482834 LOC134482834 sperm motility kinase Y-like Unmapped NC_086019.1 1 " 59,267,165 " " 59,271,168 " +

134482835 LOC134482835 sperm motility kinase Y-like Unmapped NC_086019.1 1 " 59,373,034 " " 59,376,360 " +

134482847 LOC134482847 sperm motility kinase Y-like Unmapped NC_086019.1 1 " 59,385,053 " " 59,387,844 " +

134482841 LOC134482841 sperm motility kinase Y-like Unmapped NC_086019.1 1 " 59,432,973 " " 59,436,478 " +

134485011 LOC134485011 sperm motility kinase Y-like Unmapped NC_086019.1 1 " 59,521,245 " " 59,524,694 " +

134485012 LOC134485012 sperm motility kinase Y-like Unmapped NC_086019.1 1 " 59,553,714 " " 59,557,132 " +

134485014 LOC134485014 sperm motility kinase Y-like Unmapped NC_086019.1 1 " 59,613,811 " " 59,617,808 " +

134485015 LOC134485015 sperm motility kinase Y-like Unmapped NC_086019.1 1 " 59,652,518 " " 59,657,595 " +

134485018 LOC134485018 sperm motility kinase Y-like Unmapped NC_086019.1 1 " 59,832,112 " " 59,836,542 " +

134485020 LOC134485020 sperm motility kinase Y-like Unmapped NC_086019.1 1 " 59,884,344 " " 59,900,876 " +

134485019 LOC134485019 sperm motility kinase Y-like Unmapped NC_086019.1 1 " 59,946,183 " " 59,949,789 " +

134485021 LOC134485021 sperm motility kinase Y-like Unmapped NC_086019.1 1 " 60,040,584 " " 60,044,306 " +

134485037 LOC134485037 sperm motility kinase Y-like Unmapped NC_086019.1 1 " 60,158,401 " " 60,162,385 " +

134485038 LOC134485038 sperm motility kinase Y-like Unmapped NC_086019.1 1 " 60,172,420 " " 60,176,072 " +

134485034 LOC134485034 sperm motility kinase Y-like Unmapped NC_086019.1 1 " 60,205,001 " " 60,208,418 " +

134485039 LOC134485039 sperm motility kinase Y-like Unmapped NC_086019.1 1 " 60,218,917 " " 60,222,158 " +

134485033 LOC134485033 sperm motility kinase Y-like Unmapped NC_086019.1 1 " 60,258,767 " " 60,263,955 " +

134485023 LOC134485023 sperm motility kinase Y-like Unmapped NC_086019.1 1 " 60,318,711 " " 60,323,842 " +

134485035 LOC134485035 sperm motility kinase Y-like Unmapped NC_086019.1 1 " 60,404,815 " " 60,419,478 " +

134485044 LOC134485044 sperm motility kinase Y-like Unmapped NC_086019.1 1 " 60,453,419 " " 60,455,004 " +

134485024 LOC134485024 sperm motility kinase Y-like Unmapped NC_086019.1 1 " 60,505,807 " " 60,511,841 " +

134485045 LOC134485045 sperm motility kinase Y-like Unmapped NC_086019.1 1 " 60,550,272 " " 60,553,993 " +

134485048 LOC134485048 sperm motility kinase Y-like Unmapped NC_086019.1 1 " 60,721,803 " " 60,731,956 " +

134485047 LOC134485047 sperm motility kinase Y-like Unmapped NC_086019.1 1 " 60,768,669 " " 60,773,813 " +

134485026 LOC134485026 sperm motility kinase Y-like Unmapped NC_086019.1 1 " 60,877,398 " " 60,880,926 " +

134485054 LOC134485054 sperm motility kinase Y-like Unmapped NC_086019.1 1 " 60,890,299 " " 60,894,523 " +

134484870 LOC134484870 sperm motility kinase Y-like Unmapped NC_086019.1 1 " 61,061,262 " " 61,063,166 " -

134485056 LOC134485056 sperm motility kinase Y-like Unmapped NC_086019.1 1 " 61,179,310 " " 61,184,580 " -

134485029 LOC134485029 sperm motility kinase Y-like Unmapped NC_086019.1 1 " 61,226,304 " " 61,229,240 " -

134485030 LOC134485030 uncharacterized LOC134485030 Unmapped NC_086019.1 1 " 61,369,063 " " 61,374,698 " -

134485031 LOC134485031 sperm motility kinase Y-like Unmapped NC_086019.1 1 " 61,374,866 " " 61,378,640 " -

134485061 LOC134485061 sperm motility kinase Y-like Unmapped NC_086019.1 1 " 61,413,628 " " 61,421,283 " -

134485063 LOC134485063 sperm motility kinase Y-like Unmapped NC_086019.1 1 " 61,497,425 " " 61,499,168 " -

134485064 LOC134485064 sperm motility kinase Y-like Unmapped NC_086019.1 1 " 61,539,778 " " 61,554,773 " -

134485065 LOC134485065 sperm motility kinase Y-like Unmapped NC_086019.1 1 " 61,636,024 " " 61,639,398 " -

134484872 LOC134484872 sperm motility kinase Y-like Unmapped NC_086019.1 1 " 61,775,508 " " 61,777,463 " -

134484873 LOC134484873 sperm motility kinase Y-like Unmapped NC_086019.1 1 " 61,889,991 " " 61,891,957 " -

134485067 LOC134485067 sperm motility kinase Y-like Unmapped NC_086019.1 1 " 61,980,312 " " 61,985,381 " -

134485070 LOC134485070 sperm motility kinase Y-like Unmapped NC_086019.1 1 " 62,113,992 " " 62,119,043 " -

134485069 LOC134485069 sperm motility kinase Y-like Unmapped NC_086019.1 1 " 62,129,711 " " 62,131,379 " -

134485071 LOC134485071 sperm motility kinase Y-like Unmapped NC_086019.1 1 " 62,208,872 " " 62,210,555 " -

134485068 LOC134485068 sperm motility kinase Y-like Unmapped NC_086019.1 1 " 62,408,000 " " 62,411,751 " -

134484874 LOC134484874 sperm motility kinase Y-like Unmapped NC_086019.1 1 " 62,522,475 " " 62,525,716 " -

134485075 LOC134485075 sperm motility kinase Y-like Unmapped NC_086019.1 1 " 62,725,414 " " 62,727,130 " -

134485084 LOC134485084 sperm motility kinase Y-like Unmapped NC_086019.1 1 " 62,762,384 " " 62,767,462 " -

134485076 LOC134485076 sperm motility kinase Y-like Unmapped NC_086019.1 1 " 62,848,124 " " 62,852,426 " -

134485077 LOC134485077 sperm motility kinase Y-like Unmapped NC_086019.1 1 " 62,858,228 " " 62,867,243 " -

134485079 LOC134485079 sperm motility kinase Y-like Unmapped NC_086019.1 1 " 63,006,561 " " 63,010,704 " -

134485087 LOC134485087 sperm motility kinase Y-like Unmapped NC_086019.1 1 " 63,019,458 " " 63,024,558 " -

134484876 LOC134484876 sperm motility kinase Y-like Unmapped NC_086019.1 1 " 63,074,520 " " 63,078,173 " -

134485089 LOC134485089 sperm motility kinase Y-like Unmapped NC_086019.1 1 " 63,241,083 " " 63,245,535 " -

134485090 LOC134485090 sperm motility kinase Y-like Unmapped NC_086019.1 1 " 63,284,340 " " 63,289,418 " -

134484877 LOC134484877 sperm motility kinase Y-like Unmapped NC_086019.1 1 " 63,299,163 " " 63,303,304 " -

134485080 LOC134485080 sperm motility kinase Y-like Unmapped NC_086019.1 1 " 63,354,827 " " 63,358,132 " -

134484878 LOC134484878 sperm motility kinase Y-like Unmapped NC_086019.1 1 " 63,423,058 " " 63,424,821 " -

134485091 LOC134485091 sperm motility kinase Y-like Unmapped NC_086019.1 1 " 63,509,970 " " 63,514,466 " -

134485081 LOC134485081 sperm motility kinase Y-like Unmapped NC_086019.1 1 " 63,524,857 " " 63,528,135 " -

134485092 LOC134485092 sperm motility kinase Y-like Unmapped NC_086019.1 1 " 63,578,091 " " 63,579,753 " -

134484879 LOC134484879 sperm motility kinase Y-like Unmapped NC_086019.1 1 " 63,624,171 " " 63,625,747 " -

134485082 LOC134485082 sperm motility kinase Y-like Unmapped NC_086019.1 1 " 63,702,922 " " 63,706,671 " -

134484880 LOC134484880 sperm motility kinase Y-like Unmapped NC_086019.1 1 " 63,714,586 " " 63,718,756 " -

134485083 LOC134485083 uncharacterized LOC134485083 Novel NC_086019.1 1 " 63,737,387 " " 63,741,113 " -

134482878 LOC134482878 vomeronasal type-2 receptor 116-like Unmapped NC_086019.1 1 " 72,442,310 " " 72,459,556 " +

134484881 LOC134484881 vomeronasal type-2 receptor 116-like Unmapped NC_086019.1 1 " 72,471,026 " " 72,497,882 " +

134484885 LOC134484885 vomeronasal type-1 receptor 4-like Novel NC_086019.1 1 " 73,662,417 " " 73,663,378 " +

134485275 LOC134485275 constitutive coactivator of PPAR-gamma-like protein 1 Novel NC_086019.1 1 " 74,322,211 " " 74,325,264 " +

134485100 LOC134485100 vomeronasal type-1 receptor 2-like Unmapped NC_086019.1 1 " 82,896,620 " " 82,899,107 " +

134485105 LOC134485105 protein NYNRIN-like Novel NC_086019.1 1 " 90,675,865 " " 90,680,889 " -

134483017 LOC134483017 protein NYNRIN-like Novel NC_086019.1 1 " 92,123,045 " " 92,126,207 " -

134485107 LOC134485107 uncharacterized LOC134485107 Novel NC_086019.1 1 " 94,089,997 " " 94,095,957 " +

134485111 LOC134485111 histidine-rich glycoprotein-like Novel NC_086019.1 1 " 99,251,219 " " 99,281,194 " -

134483127 LOC134483127 uncharacterized LOC134483127 Novel NC_086019.1 1 " 107,863,832 " " 107,948,708 " +

134484897 LOC134484897 glyceraldehyde-3-phosphate dehydrogenase-like Novel NC_086019.1 1 " 130,416,455 " " 130,418,307 " -

134484903 LOC134484903 olfactory receptor 5V1-like Unmapped NC_086019.1 1 " 148,270,638 " " 148,271,585 " +

134484904 LOC134484904 olfactory receptor 5V1-like Unmapped NC_086019.1 1 " 148,721,515 " " 148,722,462 " +

134483753 LOC134483753 histone H3.v1-like Novel NC_086019.1 1 " 155,822,763 " " 155,830,485 " -

134485158 LOC134485158 igE-binding protein-like Novel NC_086019.1 1 " 167,447,491 " " 167,455,913 " +

134484821 LOC134484821 olfactory receptor 5P60-like Unmapped NC_086019.1 1 " 171,565,204 " " 171,566,175 " -

134484822 LOC134484822 uncharacterized LOC134484822 Novel NC_086019.1 1 " 176,923,151 " " 176,929,075 " +

134483775 LOC134483775 uncharacterized LOC134483775 Novel NC_086019.1 1 " 178,033,926 " " 178,041,488 " -

134484916 LOC134484916 cilia- and flagella-associated protein 251-like Novel NC_086019.1 1 " 200,978,266 " " 200,980,652 " +

134485192 LOC134485192 uncharacterized LOC134485192 Novel NC_086019.1 1 " 203,495,135 " " 203,510,152 " -

134483964 LOC134483964 uncharacterized LOC134483964 Novel NC_086019.1 1 " 214,507,146 " " 214,515,425 " +

134484919 LOC134484919 putative uncharacterized protein DDB_G0271974 Novel NC_086019.1 1 " 221,723,981 " " 221,725,574 " -

134484827 LOC134484827 basic proline-rich protein-like Novel NC_086019.1 1 " 223,137,243 " " 223,138,811 " +

134485213 LOC134485213 uncharacterized LOC134485213 Novel NC_086019.1 1 " 230,123,657 " " 230,127,159 " -

134485286 LOC134485286 large ribosomal subunit protein uL29-like Novel NC_086019.1 1 " 244,281,470 " " 244,303,222 " +

134484832 LOC134484832 deoxyuridine 5'-triphosphate nucleotidohydrolase-like Novel NC_086019.1 1 " 247,414,798 " " 247,431,156 " -

134483996 LOC134483996 cytochrome P450 2C7-like Unmapped NC_086019.1 1 " 247,540,467 " " 247,596,542 " +

134484833 LOC134484833 igE-binding protein-like Novel NC_086019.1 1 " 247,709,118 " " 247,712,454 " +

134484062 LOC134484062 large ribosomal subunit protein eL21-like Novel NC_086019.1 1 " 253,764,742 " " 253,769,749 " -

134484081 LOC134484081 uncharacterized LOC134484081 Novel NC_086019.1 1 " 255,523,575 " " 255,533,840 " +

134485262 LOC134485262 uncharacterized LOC134485262 Novel NC_086019.1 1 " 267,987,336 " " 267,992,025 " +

134485540 LOC134485540 uncharacterized LOC134485540 Novel NC_086020.1 2 " 542,288 " " 598,654 " -

134485700 LOC134485700 nidogen-2-like Novel NC_086020.1 2 " 2,998,924 " " 3,001,624 " -

134485562 LOC134485562 uncharacterized LOC134485562 Novel NC_086020.1 2 " 6,786,858 " " 6,788,686 " -

134485588 LOC134485588 histidine-rich glycoprotein-like Novel NC_086020.1 2 " 34,699,057 " " 34,762,637 " -

134485591 LOC134485591 large ribosomal subunit protein eL21-like Novel NC_086020.1 2 " 37,199,570 " " 37,200,115 " -

134485594 LOC134485594 large ribosomal subunit protein eL21-like Novel NC_086020.1 2 " 40,816,256 " " 40,822,339 " +

134485847 LOC134485847 protein NYNRIN-like Novel NC_086020.1 2 " 50,766,359 " " 50,783,023 " +

134485779 LOC134485779 uncharacterized LOC134485779 Novel NC_086020.1 2 " 53,525,555 " " 53,530,711 " -

134485599 LOC134485599 large ribosomal subunit protein eL21-like Novel NC_086020.1 2 " 54,831,084 " " 54,833,924 " -

134485856 LOC134485856 uncharacterized LOC134485856 Novel NC_086020.1 2 " 66,142,367 " " 66,145,407 " -

134485870 LOC134485870 basic proline-rich protein-like Novel NC_086020.1 2 " 82,954,813 " " 82,956,432 " -

134485603 LOC134485603 uncharacterized LOC134485603 Novel NC_086020.1 2 " 83,967,762 " " 83,973,724 " +

134478919 LOC134478919 leucine-rich repeat and coiled-coil domain-containing protein 1-like Unmapped NC_086020.1 2 " 88,911,603 " " 88,954,057 " -

134485875 LOC134485875 uncharacterized LOC134485875 Unmapped NC_086020.1 2 " 88,912,409 " " 88,921,385 " -

134485876 LOC134485876 solute carrier family 7 member 12-like Unmapped NC_086020.1 2 " 88,987,615 " " 89,051,808 " -

134485787 LOC134485787 dedicator of cytokinesis protein 2-like Novel NC_086020.1 2 " 148,771,757 " " 148,773,014 " -

134485788 LOC134485788 uncharacterized LOC134485788 Novel NC_086020.1 2 " 149,444,847 " " 149,446,582 " -

134478905 LOC134478905 uncharacterized LOC134478905 Unmapped NC_086020.1 2 " 151,022,660 " " 151,114,155 " +

134485624 LOC134485624 high mobility group protein B1-like Novel NC_086020.1 2 " 152,634,059 " " 152,634,929 " -

134485791 LOC134485791 uncharacterized LOC134485791 Novel NC_086020.1 2 " 171,395,230 " " 171,416,676 " -

134485640 LOC134485640 uncharacterized LOC134485640 Novel NC_086020.1 2 " 177,708,485 " " 177,714,596 " -

134485743 LOC134485743 peptidoglycan recognition protein 3-like Unmapped NC_086020.1 2 " 179,882,812 " " 179,898,376 " +

134485793 LOC134485793 uncharacterized LOC134485793 Novel NC_086020.1 2 " 180,642,258 " " 180,646,301 " +

134485746 Lce7a late cornified envelope 7A Novel NC_086020.1 2 " 180,878,216 " " 180,878,755 " -

134485934 LOC134485934 late cornified envelope protein 1A-like Novel NC_086020.1 2 " 180,970,429 " " 180,972,282 " -

134485794 LOC134485794 late cornified envelope protein 1C-like Novel NC_086020.1 2 " 181,113,631 " " 181,114,032 " -

134485747 LOC134485747 late cornified envelope protein 3B-like Novel NC_086020.1 2 " 181,238,140 " " 181,239,673 " -

134485935 Hrnr hornerin Novel NC_086020.1 2 " 181,650,772 " " 181,663,633 " +

134485643 LOC134485643 ribonuclease H-like Novel NC_086020.1 2 " 182,934,237 " " 182,939,452 " +

134485750 LOC134485750 TD and POZ domain-containing protein 2-like Unmapped NC_086020.1 2 " 183,280,260 " " 183,281,240 " -

134485644 LOC134485644 TD and POZ domain-containing protein 5-like Unmapped NC_086020.1 2 " 183,307,983 " " 183,315,404 " -

134485936 LOC134485936 zinc finger CCCH domain-containing protein 11A-like Unmapped NC_086020.1 2 " 183,488,174 " " 183,492,280 " +

134485649 LOC134485649 uncharacterized LOC134485649 Novel NC_086020.1 2 " 185,307,113 " " 185,316,237 " -

134485802 LOC134485802 ataxin-8-like Novel NC_086020.1 2 " 185,772,243 " " 185,774,186 " -

134485939 LOC134485939 large ribosomal subunit protein eL21-like Novel NC_086020.1 2 " 191,260,390 " " 191,260,928 " +

134485757 LOC134485757 basic proline-rich protein-like Novel NC_086020.1 2 " 192,422,610 " " 192,487,640 " +

134485971 LOC134485971 uncharacterized LOC134485971 Novel NC_086020.1 2 " 223,628,086 " " 223,633,168 " +

134485690 LOC134485690 CRACD-like protein Novel NC_086020.1 2 " 229,946,227 " " 229,967,569 " -

134485693 LOC134485693 nuclear receptor subfamily 4 group A member 3-like Novel NC_086020.1 2 " 233,578,190 " " 233,599,549 " -

134484539 LOC134484539 Y-linked testis-specific protein 1-like Unmapped NW_026947364.1 3 " 60,175 " " 62,341 " -

134484540 LOC134484540 guanine nucleotide-binding protein G(I)/G(S)/G(T) subunit beta-2-like Unmapped NW_026947364.1 3 " 400,943 " " 401,796 " +

134484534 LOC134484534 Y-linked testis-specific protein 1-like Unmapped NW_026947362.1 3 " 1,347,125 " " 1,348,190 " +

134486336 LOC134486336 ewing's tumor-associated antigen 1 homolog Unmapped NC_086021.1 3 " 1,841,160 " " 1,844,188 " +

134484530 LOC134484530 uncharacterized LOC134484530 Unmapped NW_026947362.1 3 " 1,940,849 " " 1,946,232 " -

134486221 LOC134486221 Y-linked testis-specific protein 1-like Unmapped NC_086021.1 3 " 1,968,249 " " 1,970,418 " -

134484535 LOC134484535 Y-linked testis-specific protein 1-like Unmapped NW_026947362.1 3 " 1,990,730 " " 1,993,140 " +

134486223 LOC134486223 spindlin-2-like Unmapped NC_086021.1 3 " 2,948,494 " " 2,949,283 " -

134486224 LOC134486224 Y-linked testis-specific protein 1-like Unmapped NC_086021.1 3 " 3,017,304 " " 3,019,570 " -

134486225 LOC134486225 Y-linked testis-specific protein 1-like Unmapped NC_086021.1 3 " 3,267,750 " " 3,270,166 " -

134486228 LOC134486228 Y-linked testis-specific protein 1-like Unmapped NC_086021.1 3 " 3,906,655 " " 3,908,533 " -

134486229 LOC134486229 Y-linked testis-specific protein 1-like Unmapped NC_086021.1 3 " 4,004,788 " " 4,006,875 " -

134486230 LOC134486230 Y-linked testis-specific protein 1-like Unmapped NC_086021.1 3 " 4,070,479 " " 4,072,715 " -

134486231 LOC134486231 Y-linked testis-specific protein 1-like Unmapped NC_086021.1 3 " 4,484,470 " " 4,486,701 " -

134486232 LOC134486232 Y-linked testis-specific protein 1-like Unmapped NC_086021.1 3 " 4,538,726 " " 4,540,970 " -

134486234 LOC134486234 Y-linked testis-specific protein 1-like Unmapped NC_086021.1 3 " 5,060,643 " " 5,061,961 " -

134486235 LOC134486235 uncharacterized LOC134486235 Unmapped NC_086021.1 3 " 5,998,839 " " 6,002,231 " -

134486237 LOC134486237 Y-linked testis-specific protein 1-like Unmapped NC_086021.1 3 " 7,499,025 " " 7,507,451 " +

134486238 LOC134486238 Y-linked testis-specific protein 1-like Unmapped NC_086021.1 3 " 7,648,103 " " 7,650,007 " +

134486028 LOC134486028 Y-linked testis-specific protein 1-like Unmapped NC_086021.1 3 " 8,415,851 " " 8,416,796 " +

134486242 LOC134486242 Y-linked testis-specific protein 1-like Unmapped NC_086021.1 3 " 8,549,015 " " 8,552,247 " +

134486244 LOC134486244 Y-linked testis-specific protein 1-like Unmapped NC_086021.1 3 " 9,396,401 " " 9,398,653 " +

134486245 LOC134486245 Y-linked testis-specific protein 1-like Unmapped NC_086021.1 3 " 9,723,100 " " 9,725,402 " +

134486246 LOC134486246 Y-linked testis-specific protein 1-like Unmapped NC_086021.1 3 " 9,918,431 " " 9,920,659 " +

134486247 LOC134486247 Y-linked testis-specific protein 1-like Unmapped NC_086021.1 3 " 10,121,346 " " 10,123,544 " +

134486248 LOC134486248 Y-linked testis-specific protein 1-like Unmapped NC_086021.1 3 " 10,522,760 " " 10,523,808 " +

134486249 LOC134486249 Y-linked testis-specific protein 1-like Unmapped NC_086021.1 3 " 10,585,870 " " 10,588,115 " +

134486250 LOC134486250 Y-linked testis-specific protein 1-like Unmapped NC_086021.1 3 " 10,684,116 " " 10,685,986 " +

134486252 LOC134486252 Y-linked testis-specific protein 1-like Unmapped NC_086021.1 3 " 10,983,401 " " 10,987,012 " +

134486254 LOC134486254 Y-linked testis-specific protein 1-like Unmapped NC_086021.1 3 " 11,321,436 " " 11,323,854 " +

134486255 LOC134486255 Y-linked testis-specific protein 1-like Unmapped NC_086021.1 3 " 11,583,441 " " 11,585,699 " +

134486256 LOC134486256 spindlin-2-like Unmapped NC_086021.1 3 " 11,653,728 " " 11,654,506 " +

134478817 LOC134478817 Y-linked testis-specific protein 1-like Unmapped NC_086021.1 3 " 12,634,039 " " 12,636,225 " +

134486259 LOC134486259 Y-linked testis-specific protein 1-like Unmapped NC_086021.1 3 " 13,492,117 " " 13,917,093 " +

134486339 LOC134486339 uncharacterized LOC134486339 Unmapped NC_086021.1 3 " 14,085,160 " " 14,090,544 " -

134486262 LOC134486262 Y-linked testis-specific protein 1-like Unmapped NC_086021.1 3 " 14,135,056 " " 14,137,276 " +

134486263 LOC134486263 Y-linked testis-specific protein 1-like Unmapped NC_086021.1 3 " 14,319,565 " " 14,321,060 " +

134486264 LOC134486264 Y-linked testis-specific protein 1-like Unmapped NC_086021.1 3 " 14,477,580 " " 14,478,605 " +

134486340 LOC134486340 guanine nucleotide-binding protein G(I)/G(S)/G(T) subunit beta-2-like Unmapped NC_086021.1 3 " 14,958,031 " " 14,958,881 " -

134486342 LOC134486342 vomeronasal type-2 receptor 116-like Unmapped NC_086021.1 3 " 15,261,125 " " 15,267,124 " -

134486265 LOC134486265 Y-linked testis-specific protein 1-like Unmapped NC_086021.1 3 " 16,296,003 " " 16,374,467 " +

134486268 LOC134486268 Y-linked testis-specific protein 1-like Unmapped NC_086021.1 3 " 17,360,108 " " 17,360,656 " +

134486269 LOC134486269 spindlin-2-like Unmapped NC_086021.1 3 " 18,009,831 " " 18,010,847 " +

134486345 LOC134486345 serine/threonine-protein kinase 24-like Unmapped NC_086021.1 3 " 18,234,608 " " 18,236,670 " +

134486271 LOC134486271 Y-linked testis-specific protein 1-like Unmapped NC_086021.1 3 " 18,304,791 " " 18,307,077 " +

134486274 LOC134486274 Y-linked testis-specific protein 1-like Unmapped NC_086021.1 3 " 18,913,725 " " 18,915,968 " +

134486275 LOC134486275 Y-linked testis-specific protein 1-like Unmapped NC_086021.1 3 " 19,222,271 " " 19,224,452 " +

134486276 LOC134486276 Y-linked testis-specific protein 1-like Unmapped NC_086021.1 3 " 19,442,307 " " 19,444,494 " +

134486279 LOC134486279 Y-linked testis-specific protein 1-like Unmapped NC_086021.1 3 " 20,638,554 " " 20,640,735 " +

134486029 LOC134486029 zinc finger protein 844-like Unmapped NC_086021.1 3 " 21,241,638 " " 21,260,603 " +

134486036 LOC134486036 uncharacterized LOC134486036 Novel NC_086021.1 3 " 23,348,990 " " 23,361,568 " -

134486049 LOC134486049 zinc finger protein 431-like Unmapped NC_086021.1 3 " 24,597,485 " " 24,602,004 " -

134486054 LOC134486054 zinc finger protein 120-like Unmapped NC_086021.1 3 " 25,308,109 " " 25,310,000 " -

134486280 LOC134486280 uncharacterized LOC134486280 Novel NC_086021.1 3 " 26,235,111 " " 26,249,575 " -

134486098 LOC134486098 RING finger protein 208 Novel NC_086021.1 3 " 28,459,101 " " 28,460,217 " -

134486059 LOC134486059 von Ebner gland protein 1-like Novel NC_086021.1 3 " 28,963,176 " " 28,965,506 " +

134486060 LOC134486060 vomeronasal secretory protein 2-like Novel NC_086021.1 3 " 29,985,034 " " 29,988,941 " +

134486061 LOC134486061 uncharacterized LOC134486061 Novel NC_086021.1 3 " 30,266,133 " " 30,271,065 " -

134486063 LOC134486063 uncharacterized LOC134486063 Novel NC_086021.1 3 " 30,485,133 " " 30,489,946 " +

134486062 LOC134486062 uncharacterized LOC134486062 Novel NC_086021.1 3 " 30,506,966 " " 30,511,697 " -

134486216 LOC134486216 protein tyrosine phosphatase type IVA 1-like Novel NC_086021.1 3 " 41,352,627 " " 41,364,442 " +

134486085 LOC134486085 elongin-B-like Unmapped NC_086021.1 3 " 41,393,317 " " 41,394,459 " +

134486217 Adgrd2 adhesion G protein-coupled receptor D2 Novel NC_086021.1 3 " 42,844,333 " " 42,870,117 " +

134486093 LOC134486093 uncharacterized LOC134486093 Novel NC_086021.1 3 " 55,511,514 " " 55,559,597 " +

134486369 LOC134486369 trichohyalin-like Novel NC_086021.1 3 " 70,952,094 " " 70,979,357 " -

134486107 LOC134486107 large ribosomal subunit protein eL8-like Novel NC_086021.1 3 " 77,742,314 " " 77,743,203 " -

366100 Or8h7b olfactory receptor family 8 subfamily H member 7B Unmapped NC_086021.1 3 " 92,297,102 " " 92,298,049 " -

134486323 Fam180b family with sequence similarity 180 member B Novel NC_086021.1 3 " 97,329,796 " " 97,330,637 " -

134486296 LOC134486296 uncharacterized LOC134486296 Novel NC_086021.1 3 " 107,917,471 " " 107,947,240 " -

134486414 LOC134486414 large ribosomal subunit protein eL21 Novel NC_086021.1 3 " 108,967,369 " " 108,967,956 " +

134486133 Dcdc1 doublecortin domain containing 1 Novel NC_086021.1 3 " 112,978,101 " " 112,996,997 " +

134486299 LOC134486299 olfactory receptor 4F3/4F16/4F29-like Novel NC_086021.1 3 " 119,193,492 " " 119,194,430 " -

134486143 LOC134486143 cuticle collagen 40-like Novel NC_086021.1 3 " 134,376,226 " " 134,385,728 " +

134486149 LOC134486149 histidine-rich glycoprotein-like Novel NC_086021.1 3 " 136,057,161 " " 136,131,034 " -

134486449 LOC134486449 dachshund homolog 1-like Novel NC_086021.1 3 " 141,821,005 " " 141,823,105 " +

134486452 LOC134486452 uncharacterized LOC134486452 Novel NC_086021.1 3 " 146,237,997 " " 146,243,609 " -

134486325 LOC134486325 eukaryotic translation initiation factor 1-like Novel NC_086021.1 3 " 157,215,442 " " 157,218,016 " -

134486328 LOC134486328 uncharacterized LOC134486328 Novel NC_086021.1 3 " 162,271,861 " " 162,275,402 " -

134486330 LOC134486330 antileukoproteinase-like Novel NC_086021.1 3 " 173,430,481 " " 173,431,932 " -

134486481 LOC134486481 keratin-associated protein 4-3-like Novel NC_086021.1 3 " 177,471,702 " " 177,478,259 " +

134486331 LOC134486331 guanine nucleotide exchange factor subunit RIC1-like Novel NC_086021.1 3 " 177,977,047 " " 177,980,776 " +

134486025 LOC134486025 guanine nucleotide exchange factor subunit RIC1-like Novel NC_086021.1 3 " 178,699,736 " " 178,700,489 " +

134486488 LOC134486488 uncharacterized LOC134486488 Novel NC_086021.1 3 " 179,192,915 " " 179,201,123 " -

134486317 LOC134486317 splicing factor 3A subunit 2-like Novel NC_086021.1 3 " 180,858,617 " " 180,859,324 " -

134486332 LOC134486332 dynein heavy chain-like Novel NC_086021.1 3 " 181,480,516 " " 181,482,357 " +

134486517 LOC134486517 zinc finger protein 431-like Novel NC_086021.1 3 " 189,367,334 " " 189,388,301 " +

134486534 LOC134486534 uncharacterized LOC134486534 Novel NC_086022.1 4 " 3,576,823 " " 3,582,921 " +

134486536 LOC134486536 large ribosomal subunit protein uL22-like Novel NC_086022.1 4 " 4,724,464 " " 4,725,339 " -

134486705 LOC134486705 ataxin-8-like Novel NC_086022.1 4 " 7,590,035 " " 7,620,478 " -

134486664 LOC134486664 NEDD4-binding protein 1-like Novel NC_086022.1 4 " 21,892,257 " " 21,894,363 " -

134486699 LOC134486699 NEDD4-binding protein 1-like Novel NC_086022.1 4 " 21,899,514 " " 21,901,104 " -

134486665 LOC134486665 NEDD4-binding protein 1-like Novel NC_086022.1 4 " 21,928,934 " " 21,930,941 " -

134486557 LOC134486557 uncharacterized histidine-rich protein DDB_G0274557-like Novel NC_086022.1 4 " 31,128,723 " " 31,146,421 " -

134486876 LOC134486876 large ribosomal subunit protein eL31-like Novel NC_086022.1 4 " 36,630,892 " " 36,631,224 " +

134486736 LOC134486736 uncharacterized LOC134486736 Novel NC_086022.1 4 " 48,085,520 " " 48,090,111 " -

134486742 LOC134486742 uncharacterized LOC134486742 Novel NC_086022.1 4 " 52,732,175 " " 52,737,334 " +

134486567 LOC134486567 involucrin-like Novel NC_086022.1 4 " 59,039,714 " " 59,041,373 " -

134486767 LOC134486767 igE-binding protein-like Novel NC_086022.1 4 " 81,925,038 " " 81,930,714 " -

134486778 LOC134486778 homeobox protein 14-like Novel NC_086022.1 4 " 99,113,698 " " 99,122,791 " +

134486676 LOC134486676 ARL14 effector protein-like Unmapped NC_086022.1 4 " 103,463,801 " " 103,464,061 " -

134486677 LOC134486677 ARL14 effector protein-like Unmapped NC_086022.1 4 " 103,558,636 " " 103,558,896 " -

134486889 LOC134486889 high mobility group protein B1-like Novel NC_086022.1 4 " 109,288,028 " " 109,288,612 " -

134486828 LOC134486828 uncharacterized LOC134486828 Novel NC_086022.1 4 " 142,100,750 " " 142,106,015 " -

134486623 LOC134486623 uncharacterized LOC134486623 Novel NC_086022.1 4 " 147,925,557 " " 147,933,302 " +

134486891 LOC134486891 transcriptional enhancer factor TEF-3-like Novel NC_086022.1 4 " 162,922,920 " " 162,924,363 " +

134486643 LOC134486643 uncharacterized LOC134486643 Novel NC_086022.1 4 " 163,104,857 " " 163,122,234 " -

134486852 LOC134486852 keratin-associated protein 5-5-like Novel NC_086022.1 4 " 168,598,408 " " 168,659,553 " +

134486894 LOC134486894 "ATP synthase subunit d, mitochondrial-like" Novel NC_086022.1 4 " 171,001,176 " " 171,009,465 " +

134486654 LOC134486654 large ribosomal subunit protein eL21-like Novel NC_086022.1 4 " 179,059,496 " " 179,067,472 " +

134486870 LOC134486870 large ribosomal subunit protein eL31-like Novel NC_086022.1 4 " 180,433,957 " " 180,438,886 " +

134486897 LOC134486897 uncharacterized LOC134486897 Novel NC_086022.1 4 " 183,643,491 " " 183,645,268 " +

134487093 LOC134487093 uncharacterized LOC134487093 Unmapped NC_086023.1 5 " 373,827 " " 375,415 " -

134487094 LOC134487094 endogenous retrovirus group K member 5 Gag polyprotein-like Unmapped NC_086023.1 5 " 375,415 " " 379,754 " -

134487095 LOC134487095 uncharacterized LOC134487095 Unmapped NC_086023.1 5 " 655,942 " " 657,629 " -

134487097 LOC134487097 uncharacterized LOC134487097 Unmapped NC_086023.1 5 " 1,321,222 " " 1,322,906 " -

134487098 LOC134487098 uncharacterized LOC134487098 Unmapped NC_086023.1 5 " 2,516,939 " " 2,518,626 " -

134486907 LOC134486907 uncharacterized LOC134486907 Novel NC_086023.1 5 " 7,587,125 " " 7,590,533 " -

134487053 LOC134487053 uncharacterized LOC134487053 Novel NC_086023.1 5 " 9,276,923 " " 9,279,281 " -

134478941 LOC134478941 high mobility group protein B1-like Novel NC_086023.1 5 " 37,705,069 " " 37,706,161 " +

134487102 LOC134487102 glyceraldehyde-3-phosphate dehydrogenase-like Novel NC_086023.1 5 " 40,496,618 " " 40,568,568 " -

134479060 LOC134479060 igE-binding protein-like Novel NC_086023.1 5 " 43,887,110 " " 43,908,396 " -

134479061 LOC134479061 histidine-rich glycoprotein-like Novel NC_086023.1 5 " 52,056,091 " " 52,065,243 " +

134486924 LOC134486924 uncharacterized LOC134486924 Novel NC_086023.1 5 " 54,270,069 " " 54,273,065 " -

134486931 LOC134486931 protein SPATA31F1-2-like Novel NC_086023.1 5 " 61,794,507 " " 61,801,383 " -

134478972 LOC134478972 large ribosomal subunit protein eL29-like Novel NC_086023.1 5 " 71,476,266 " " 71,996,276 " -

134479066 LOC134479066 zinc finger protein 37-like Novel NC_086023.1 5 " 79,726,432 " " 79,755,008 " -

134478986 LOC134478986 major urinary protein-like Unmapped NC_086023.1 5 " 80,016,224 " " 80,019,696 " -

134478903 LOC134478903 major urinary protein-like Unmapped NC_086023.1 5 " 80,198,328 " " 80,199,934 " -

134478991 LOC134478991 major urinary protein-like Unmapped NC_086023.1 5 " 80,199,825 " " 80,200,660 " -

134479073 LOC134479073 uncharacterized LOC134479073 Unmapped NC_086023.1 5 " 90,502,244 " " 90,503,768 " -

134479002 LOC134479002 uncharacterized LOC134479002 Novel NC_086023.1 5 " 100,706,379 " " 100,709,698 " -

134486948 LOC134486948 uncharacterized LOC134486948 Novel NC_086023.1 5 " 106,471,601 " " 106,475,932 " -

134487074 LOC134487074 interferon alpha-1-like Unmapped NC_086023.1 5 " 108,242,595 " " 108,243,331 " -

134487075 LOC134487075 interferon alpha-1-like Unmapped NC_086023.1 5 " 108,262,248 " " 108,263,205 " -

134487076 LOC134487076 interferon alpha-1-like Unmapped NC_086023.1 5 " 108,275,343 " " 108,276,124 " -

134487077 LOC134487077 interferon alpha-1-like Unmapped NC_086023.1 5 " 108,303,567 " " 108,304,575 " -

134479080 LOC134479080 uncharacterized LOC134479080 Novel NC_086023.1 5 " 108,481,112 " " 108,487,087 " -

134479006 LOC134479006 uncharacterized LOC134479006 Novel NC_086023.1 5 " 109,118,071 " " 109,119,568 " -

134486952 LOC134486952 glyceraldehyde-3-phosphate dehydrogenase Novel NC_086023.1 5 " 116,787,565 " " 116,788,856 " +

134479017 LOC134479017 uncharacterized LOC134479017 Novel NC_086023.1 5 " 121,101,279 " " 121,106,539 " -

134479019 LOC134479019 "bifunctional methylenetetrahydrofolate dehydrogenase/cyclohydrolase, mitochondrial-like" Unmapped NC_086023.1 5 " 121,778,155 " " 121,779,295 " +

134487081 LOC134487081 PRAME family member 8-like Unmapped NC_086023.1 5 " 121,785,723 " " 121,789,132 " -

134479085 LOC134479085 uncharacterized LOC134479085 Novel NC_086023.1 5 " 129,623,464 " " 129,638,523 " +

134486976 LOC134486976 uncharacterized LOC134486976 Novel NC_086023.1 5 " 136,435,739 " " 136,468,382 " -

134486984 LOC134486984 large ribosomal subunit protein eL33-like Novel NC_086023.1 5 " 139,462,028 " " 139,462,603 " -

134487010 LOC134487010 uncharacterized LOC134487010 Novel NC_086023.1 5 " 152,918,686 " " 152,928,210 " +

134487030 LOC134487030 uncharacterized LOC134487030 Novel NC_086023.1 5 " 159,928,284 " " 159,942,237 " +

134479047 LOC134479047 integumentary mucin C.1-like Novel NC_086023.1 5 " 165,893,327 " " 165,903,457 " +

134487043 LOC134487043 uncharacterized LOC134487043 Novel NC_086023.1 5 " 167,130,292 " " 167,133,158 " +

134487046 LOC134487046 small ribosomal subunit protein eS27-like Novel NC_086023.1 5 " 168,247,689 " " 168,248,050 " +

134479297 LOC134479297 uncharacterized LOC134479297 Unmapped NC_086024.1 6 " 780,721 " " 789,067 " +

134479508 LOC134479508 endogenous retrovirus group K member 5 Gag polyprotein-like Unmapped NC_086024.1 6 " 972,717 " " 973,374 " +

134479510 LOC134479510 endogenous retrovirus group K member 5 Gag polyprotein-like Unmapped NC_086024.1 6 " 1,636,077 " " 1,636,730 " -

134479268 LOC134479268 large ribosomal subunit protein eL8-like Novel NC_086024.1 6 " 5,951,970 " " 5,952,334 " +

134479298 LOC134479298 uncharacterized LOC134479298 Novel NC_086024.1 6 " 6,210,012 " " 6,217,083 " +

134479308 LOC134479308 uncharacterized LOC134479308 Novel NC_086024.1 6 " 13,144,336 " " 13,149,390 " -

134479089 LOC134479089 large ribosomal subunit protein eL8-like Novel NC_086024.1 6 " 13,406,325 " " 13,407,598 " -

134479312 LOC134479312 cilia- and flagella-associated protein 251-like Novel NC_086024.1 6 " 15,477,599 " " 15,516,886 " +

134479320 LOC134479320 histidine-rich glycoprotein-like Novel NC_086024.1 6 " 19,647,241 " " 19,656,595 " +

134479101 LOC134479101 uncharacterized LOC134479101 Novel NC_086024.1 6 " 20,400,357 " " 20,409,555 " +

134479104 LOC134479104 uncharacterized LOC134479104 Novel NC_086024.1 6 " 21,061,768 " " 21,090,658 " +

134479106 LOC134479106 keratin-associated protein 5-1-like Novel NC_086024.1 6 " 21,931,651 " " 21,941,731 " -

134479109 LOC134479109 histidine-rich glycoprotein-like Novel NC_086024.1 6 " 29,361,647 " " 29,372,185 " +

134479112 LOC134479112 uncharacterized LOC134479112 Novel NC_086024.1 6 " 33,266,513 " " 33,286,296 " -

134479278 LOC134479278 U1 small nuclear ribonucleoprotein 70 kDa-like Novel NC_086024.1 6 " 38,642,504 " " 38,719,512 " -

134479340 LOC134479340 uncharacterized LOC134479340 Novel NC_086024.1 6 " 40,058,906 " " 40,067,246 " -

134479342 LOC134479342 uncharacterized LOC134479342 Novel NC_086024.1 6 " 42,648,735 " " 42,910,638 " +

134479283 LOC134479283 cAMP-dependent protein kinase inhibitor gamma-like Novel NC_086024.1 6 " 49,942,433 " " 49,944,948 " +

134479124 LOC134479124 uncharacterized LOC134479124 Novel NC_086024.1 6 " 75,154,560 " " 75,155,246 " +

134479212 LOC134479212 protein NYNRIN-like Novel NC_086024.1 6 " 83,030,174 " " 83,035,635 " -

134479392 LOC134479392 uncharacterized LOC134479392 Novel NC_086024.1 6 " 86,834,690 " " 86,838,089 " -

134479394 LOC134479394 glyceraldehyde-3-phosphate dehydrogenase-like Novel NC_086024.1 6 " 90,631,821 " " 90,637,045 " +

134479287 LOC134479287 uncharacterized LOC134479287 Novel NC_086024.1 6 " 96,960,739 " " 96,965,845 " +

134479128 LOC134479128 pre-mRNA-splicing factor CWC22 homolog Unmapped NC_086024.1 6 " 105,089,288 " " 105,090,550 " -

134479437 LOC134479437 M-phase phosphoprotein 6-like Unmapped NC_086024.1 6 " 105,134,987 " " 105,136,565 " -

134479419 LOC134479419 pre-mRNA-splicing factor CWC22 homolog Unmapped NC_086024.1 6 " 105,140,816 " " 105,143,198 " -

134479441 LOC134479441 M-phase phosphoprotein 6-like Unmapped NC_086024.1 6 " 105,190,796 " " 105,191,253 " -

134479429 LOC134479429 dnaJ homolog subfamily C member 17-like Unmapped NC_086024.1 6 " 105,191,700 " " 105,192,575 " -

134479420 LOC134479420 RING-type E3 ubiquitin-protein ligase PPIL2-like Unmapped NC_086024.1 6 " 105,202,647 " " 105,204,402 " -

134479440 LOC134479440 M-phase phosphoprotein 6-like Unmapped NC_086024.1 6 " 105,291,288 " " 105,291,707 " -

134479418 LOC134479418 pre-mRNA-splicing factor CWC22 homolog Unmapped NC_086024.1 6 " 105,295,814 " " 105,298,892 " -

134479442 LOC134479442 M-phase phosphoprotein 6-like Unmapped NC_086024.1 6 " 105,353,666 " " 105,354,085 " -

134479430 LOC134479430 dnaJ homolog subfamily C member 17-like Unmapped NC_086024.1 6 " 105,354,567 " " 105,355,442 " -

134479421 LOC134479421 RING-type E3 ubiquitin-protein ligase PPIL2-like Unmapped NC_086024.1 6 " 105,365,661 " " 105,367,286 " -

134479443 LOC134479443 M-phase phosphoprotein 6-like Unmapped NC_086024.1 6 " 105,403,671 " " 105,404,126 " +

134479444 LOC134479444 M-phase phosphoprotein 6-like Unmapped NC_086024.1 6 " 105,500,928 " " 105,501,335 " -

134479432 LOC134479432 dnaJ homolog subfamily C member 17-like Unmapped NC_086024.1 6 " 105,501,833 " " 105,502,693 " -

134479417 LOC134479417 pre-mRNA-splicing factor CWC22 homolog Unmapped NC_086024.1 6 " 105,504,789 " " 105,508,514 " -

134479416 LOC134479416 pre-mRNA-splicing factor CWC22 homolog Unmapped NC_086024.1 6 " 105,537,666 " " 105,540,656 " +

134479431 LOC134479431 dnaJ homolog subfamily C member 17-like Unmapped NC_086024.1 6 " 105,543,373 " " 105,544,233 " +

134479439 LOC134479439 M-phase phosphoprotein 6-like Unmapped NC_086024.1 6 " 105,544,403 " " 105,545,138 " +

134479427 LOC134479427 splicing factor YJU2-like Unmapped NC_086024.1 6 " 105,632,064 " " 105,633,766 " -

134479415 LOC134479415 pre-mRNA-splicing factor CWC22 homolog Unmapped NC_086024.1 6 " 105,686,739 " " 105,689,984 " +

134479433 LOC134479433 dnaJ homolog subfamily C member 17-like Unmapped NC_086024.1 6 " 105,691,280 " " 105,694,151 " +

134479438 LOC134479438 M-phase phosphoprotein 6-like Unmapped NC_086024.1 6 " 105,694,170 " " 105,695,400 " +

134479414 LOC134479414 RING-type E3 ubiquitin-protein ligase PPIL2-like Novel NC_086024.1 6 " 105,755,446 " " 105,757,206 " -

134479156 LOC134479156 keratin-associated protein 21-1-like Novel NC_086024.1 6 " 131,636,101 " " 131,636,525 " +

134479157 LOC134479157 cGMP-gated cation channel alpha-1-like Novel NC_086024.1 6 " 134,260,519 " " 134,272,705 " +

134479162 LOC134479162 uncharacterized LOC134479162 Unmapped NC_086024.1 6 " 138,672,610 " " 138,693,546 " -

134479494 LOC134479494 uncharacterized LOC134479494 Novel NC_086024.1 6 " 145,310,346 " " 145,324,412 " -

134479803 LOC134479803 17-beta-hydroxysteroid dehydrogenase type 6-like Unmapped NC_086025.1 7 " 1,007,519 " " 1,027,204 " -

134479804 LOC134479804 protein NYNRIN-like Novel NC_086025.1 7 " 7,383,830 " " 7,386,915 " -

134479620 LOC134479620 large ribosomal subunit protein eL33-like Novel NC_086025.1 7 " 10,143,571 " " 10,156,900 " -

134479623 LOC134479623 zinc finger protein 14-like Novel NC_086025.1 7 " 12,986,320 " " 12,988,205 " +

134479831 LOC134479831 putative sperm motility kinase W Unmapped NC_086025.1 7 " 16,764,027 " " 16,782,385 " -

134479832 LOC134479832 putative sperm motility kinase W Unmapped NC_086025.1 7 " 17,047,809 " " 17,099,064 " +

134479836 LOC134479836 ubiquitin-conjugating enzyme E2 R2-like Unmapped NC_086025.1 7 " 17,143,822 " " 17,179,976 " -

134479830 LOC134479830 putative sperm motility kinase W Unmapped NC_086025.1 7 " 17,329,453 " " 17,385,627 " -

134479633 LOC134479633 putative sperm motility kinase W Unmapped NC_086025.1 7 " 18,440,110 " " 18,441,591 " +

134479844 LOC134479844 igE-binding protein-like Novel NC_086025.1 7 " 18,496,531 " " 18,505,461 " +

134479650 LOC134479650 uncharacterized LOC134479650 Novel NC_086025.1 7 " 22,313,367 " " 22,328,345 " +

134479793 LOC134479793 uncharacterized LOC134479793 Novel NC_086025.1 7 " 23,745,846 " " 23,758,954 " +

134479863 LOC134479863 death domain-containing protein CRADD-like Novel NC_086025.1 7 " 31,685,482 " " 31,868,101 " -

134479796 LOC134479796 MLV-related proviral Env polyprotein-like Novel NC_086025.1 7 " 41,480,437 " " 41,496,098 " +

134479798 LOC134479798 sentrin-specific protease 2-like Novel NC_086025.1 7 " 59,516,268 " " 59,517,673 " +

134479799 LOC134479799 "nascent polypeptide-associated complex subunit alpha, muscle-specific form-like" Novel NC_086025.1 7 " 60,527,760 " " 60,538,009 " +

134479890 LOC134479890 uncharacterized LOC134479890 Novel NC_086025.1 7 " 67,253,824 " " 67,257,941 " +

134479892 LOC134479892 uncharacterized LOC134479892 Novel NC_086025.1 7 " 69,209,089 " " 69,212,733 " +

134479904 LOC134479904 keratin-associated protein 10-6-like Novel NC_086025.1 7 " 86,306,287 " " 86,542,281 " -

134479738 LOC134479738 uncharacterized LOC134479738 Novel NC_086025.1 7 " 95,515,884 " " 95,522,028 " -

134479607 LOC134479607 igE-binding protein-like Novel NC_086025.1 7 " 108,678,774 " " 108,679,856 " +

134479945 LOC134479945 uncharacterized LOC134479945 Novel NC_086025.1 7 " 115,376,444 " " 115,385,131 " +

134479801 LOC134479801 uncharacterized LOC134479801 Novel NC_086025.1 7 " 115,915,714 " " 115,921,890 " +

134479761 LOC134479761 uncharacterized LOC134479761 Novel NC_086025.1 7 " 118,588,729 " " 118,595,120 " -

134479788 LOC134479788 uncharacterized LOC134479788 Novel NC_086025.1 7 " 134,652,199 " " 134,655,285 " +

134479581 LOC134479581 uncharacterized LOC134479581 Novel NC_086025.1 7 " 135,268,978 " " 135,287,635 " +

134479616 LOC134479616 mucin-like protein 2 Unmapped NC_086025.1 7 " 136,847,836 " " 136,851,423 " -

134479802 LOC134479802 E3 ubiquitin-protein ligase CHFR-like Unmapped NC_086025.1 7 " 136,894,031 " " 136,895,651 " +

134480123 LOC134480123 endogenous retrovirus group K member 10 Gag polyprotein-like Unmapped NC_086026.1 8 " 3,847,319 " " 3,852,167 " -

134480125 LOC134480125 endogenous retrovirus group K member 5 Gag polyprotein-like Unmapped NC_086026.1 8 " 4,619,663 " " 4,620,316 " -

134480126 LOC134480126 endogenous retrovirus group K member 5 Gag polyprotein-like Unmapped NC_086026.1 8 " 5,052,389 " " 5,053,022 " +

134480127 LOC134480127 igE-binding protein-like Novel NC_086026.1 8 " 18,191,032 " " 18,262,084 " +

134480140 LOC134480140 uncharacterized LOC134480140 Novel NC_086026.1 8 " 18,723,791 " " 18,779,583 " +

134479996 LOC134479996 uncharacterized LOC134479996 Novel NC_086026.1 8 " 20,800,480 " " 20,807,705 " -

134479967 LOC134479967 uncharacterized LOC134479967 Novel NC_086026.1 8 " 22,567,574 " " 22,590,747 " -

134479970 LOC134479970 EH domain-containing protein 3-like Novel NC_086026.1 8 " 31,631,556 " " 31,632,393 " +

134480154 LOC134480154 large ribosomal subunit protein eL21-like Novel NC_086026.1 8 " 38,163,551 " " 38,164,257 " +

134480129 LOC134480129 potassium/sodium hyperpolarization-activated cyclic nucleotide-gated channel 2-like Novel NC_086026.1 8 " 38,684,667 " " 38,698,628 " -

134480016 LOC134480016 urinary protein 3 Unmapped NC_086026.1 8 " 43,339,749 " " 43,343,430 " -

134480019 LOC134480019 disks large homolog 5-like Unmapped NC_086026.1 8 " 46,355,149 " " 46,359,979 " -

134480020 LOC134480020 disks large homolog 5-like Unmapped NC_086026.1 8 " 46,377,046 " " 46,381,882 " -

134480135 LOC134480135 uncharacterized LOC134480135 Unmapped NC_086026.1 8 " 46,398,946 " " 46,426,196 " -

134480022 LOC134480022 disks large homolog 5-like Unmapped NC_086026.1 8 " 46,440,140 " " 46,457,470 " -

134480136 LOC134480136 disks large homolog 5-like Unmapped NC_086026.1 8 " 46,623,131 " " 46,627,864 " -

134480021 LOC134480021 disks large homolog 5-like Unmapped NC_086026.1 8 " 46,656,985 " " 46,661,944 " -

134478883 LOC134478883 uncharacterized LOC134478883 Unmapped NC_086026.1 8 " 46,689,731 " " 46,693,559 " -

134480025 LOC134480025 disks large homolog 5-like Unmapped NC_086026.1 8 " 46,720,030 " " 46,724,942 " -

134478912 LOC134478912 disks large homolog 5-like Unmapped NC_086026.1 8 " 46,741,905 " " 46,746,727 " -

134480026 LOC134480026 disks large homolog 5-like Unmapped NC_086026.1 8 " 46,764,344 " " 46,769,393 " -

134480031 LOC134480031 disks large homolog 5-like Unmapped NC_086026.1 8 " 46,795,620 " " 46,801,034 " -

134480030 LOC134480030 disks large homolog 5-like Unmapped NC_086026.1 8 " 46,830,671 " " 46,835,496 " -

134480029 LOC134480029 disks large homolog 5-like Unmapped NC_086026.1 8 " 46,884,519 " " 46,889,333 " -

134480032 LOC134480032 disks large homolog 5-like Unmapped NC_086026.1 8 " 46,940,863 " " 46,945,679 " -

134480028 LOC134480028 disks large homolog 5-like Unmapped NC_086026.1 8 " 46,997,933 " " 47,001,667 " -

134480137 LOC134480137 disks large homolog 5-like Unmapped NC_086026.1 8 " 47,057,688 " " 47,062,199 " -

134480138 LOC134480138 uncharacterized LOC134480138 Novel NC_086026.1 8 " 49,873,880 " " 49,878,503 " +

134480184 LOC134480184 uncharacterized LOC134480184 Novel NC_086026.1 8 " 65,338,695 " " 65,341,704 " +

134480185 LOC134480185 large ribosomal subunit protein eL21-like Novel NC_086026.1 8 " 65,386,804 " " 65,387,618 " -

134480309 LOC134480309 uncharacterized LOC134480309 Novel NC_086027.1 9 " 220,239 " " 233,989 " +

134480470 LOC134480470 TINCR ubiquitin domain containing Novel NC_086027.1 9 " 1,476,770 " " 1,477,039 " -

134480322 LOC134480322 sulfotransferase 1C2A-like Unmapped NC_086027.1 9 " 7,159,289 " " 7,190,403 " +

134480324 LOC134480324 sulfotransferase 1C2A-like Unmapped NC_086027.1 9 " 7,287,457 " " 7,318,453 " +

134480323 LOC134480323 putative sperm motility kinase W Unmapped NC_086027.1 9 " 7,351,363 " " 7,380,642 " +

134480473 LOC134480473 uncharacterized LOC134480473 Unmapped NC_086027.1 9 " 10,421,076 " " 10,443,612 " -

134480476 LOC134480476 uncharacterized LOC134480476 Unmapped NC_086027.1 9 " 10,473,727 " " 10,495,105 " -

134480474 LOC134480474 uncharacterized LOC134480474 Unmapped NC_086027.1 9 " 10,631,773 " " 10,815,822 " -

134480477 LOC134480477 uncharacterized LOC134480477 Unmapped NC_086027.1 9 " 10,712,779 " " 10,734,558 " -

134480478 LOC134480478 uncharacterized LOC134480478 Unmapped NC_086027.1 9 " 10,817,296 " " 10,856,385 " -

134480475 LOC134480475 uncharacterized LOC134480475 Unmapped NC_086027.1 9 " 10,892,217 " " 10,913,689 " -

134480481 LOC134480481 uncharacterized LOC134480481 Unmapped NC_086027.1 9 " 11,367,371 " " 11,405,371 " -

134480483 LOC134480483 uncharacterized LOC134480483 Unmapped NC_086027.1 9 " 11,518,739 " " 11,536,968 " -

134480482 LOC134480482 uncharacterized LOC134480482 Unmapped NC_086027.1 9 " 11,548,404 " " 11,570,206 " -

134480484 LOC134480484 uncharacterized LOC134480484 Unmapped NC_086027.1 9 " 11,594,197 " " 11,608,608 " -

134480485 LOC134480485 uncharacterized LOC134480485 Unmapped NC_086027.1 9 " 11,638,295 " " 11,646,968 " -

134480326 LOC134480326 uncharacterized LOC134480326 Unmapped NC_086027.1 9 " 12,002,916 " " 12,010,658 " -

134480488 LOC134480488 uncharacterized LOC134480488 Unmapped NC_086027.1 9 " 12,300,611 " " 12,308,399 " -

134480490 LOC134480490 uncharacterized LOC134480490 Unmapped NC_086027.1 9 " 12,396,166 " " 12,843,405 " -

134480263 LOC134480263 ERC protein 2-like Unmapped NC_086027.1 9 " 12,435,297 " " 12,437,537 " +

134480493 LOC134480493 uncharacterized LOC134480493 Unmapped NC_086027.1 9 " 12,491,709 " " 12,500,042 " -

134478920 LOC134478920 uncharacterized LOC134478920 Unmapped NC_086027.1 9 " 12,525,949 " " 12,538,441 " -

134480492 LOC134480492 uncharacterized LOC134480492 Unmapped NC_086027.1 9 " 12,615,558 " " 12,629,136 " -

134480491 LOC134480491 uncharacterized LOC134480491 Unmapped NC_086027.1 9 " 12,691,111 " " 12,699,471 " -

134480489 LOC134480489 uncharacterized LOC134480489 Unmapped NC_086027.1 9 " 12,774,136 " " 12,782,877 " -

134480487 LOC134480487 uncharacterized LOC134480487 Unmapped NC_086027.1 9 " 12,973,537 " " 12,993,589 " -

134480496 LOC134480496 uncharacterized LOC134480496 Unmapped NC_086027.1 9 " 13,118,057 " " 13,130,386 " -

134480497 LOC134480497 uncharacterized LOC134480497 Unmapped NC_086027.1 9 " 13,154,146 " " 13,179,932 " -

134480501 LOC134480501 uncharacterized LOC134480501 Unmapped NC_086027.1 9 " 13,447,914 " " 13,468,255 " -

134480500 LOC134480500 uncharacterized LOC134480500 Unmapped NC_086027.1 9 " 13,480,983 " " 13,506,924 " -

134480502 LOC134480502 uncharacterized LOC134480502 Unmapped NC_086027.1 9 " 13,537,133 " " 13,558,847 " -

134480503 LOC134480503 uncharacterized LOC134480503 Unmapped NC_086027.1 9 " 13,626,832 " " 13,720,870 " -

134480330 LOC134480330 uncharacterized LOC134480330 Unmapped NC_086027.1 9 " 13,750,808 " " 13,765,667 " -

134480507 LOC134480507 uncharacterized LOC134480507 Unmapped NC_086027.1 9 " 13,826,198 " " 13,833,705 " -

134480506 LOC134480506 uncharacterized LOC134480506 Unmapped NC_086027.1 9 " 13,907,329 " " 13,926,592 " -

134480509 LOC134480509 uncharacterized LOC134480509 Unmapped NC_086027.1 9 " 13,940,809 " " 13,961,074 " -

134480505 LOC134480505 uncharacterized LOC134480505 Unmapped NC_086027.1 9 " 14,013,910 " " 14,024,158 " -

134480508 LOC134480508 uncharacterized LOC134480508 Unmapped NC_086027.1 9 " 14,207,209 " " 14,235,395 " -

134480511 LOC134480511 uncharacterized LOC134480511 Unmapped NC_086027.1 9 " 14,254,947 " " 14,265,858 " -

134480513 LOC134480513 girdin-like Unmapped NC_086027.1 9 " 14,329,687 " " 14,340,135 " -

134480518 LOC134480518 uncharacterized LOC134480518 Unmapped NC_086027.1 9 " 14,372,242 " " 14,381,162 " -

134480521 LOC134480521 uncharacterized LOC134480521 Unmapped NC_086027.1 9 " 14,621,660 " " 14,630,578 " -

134480331 LOC134480331 uncharacterized LOC134480331 Unmapped NC_086027.1 9 " 14,657,515 " " 14,666,350 " -

134480520 LOC134480520 uncharacterized LOC134480520 Unmapped NC_086027.1 9 " 14,696,998 " " 14,705,193 " -

134480516 LOC134480516 girdin-like Unmapped NC_086027.1 9 " 14,814,420 " " 14,847,834 " +

134480514 LOC134480514 uncharacterized LOC134480514 Unmapped NC_086027.1 9 " 14,866,272 " " 14,889,398 " +

134480523 LOC134480523 uncharacterized LOC134480523 Unmapped NC_086027.1 9 " 14,960,282 " " 14,991,789 " +

134480522 LOC134480522 uncharacterized LOC134480522 Unmapped NC_086027.1 9 " 14,995,536 " " 15,057,884 " +

134480517 LOC134480517 uncharacterized LOC134480517 Unmapped NC_086027.1 9 " 15,845,912 " " 15,862,555 " +

134480519 LOC134480519 uncharacterized LOC134480519 Unmapped NC_086027.1 9 " 15,994,552 " " 16,036,299 " +

134480515 LOC134480515 uncharacterized LOC134480515 Unmapped NC_086027.1 9 " 16,118,664 " " 16,130,981 " +

134480525 LOC134480525 uncharacterized LOC134480525 Unmapped NC_086027.1 9 " 16,269,627 " " 16,279,045 " +

134480526 LOC134480526 uncharacterized LOC134480526 Unmapped NC_086027.1 9 " 16,298,552 " " 16,320,284 " +

134480528 LOC134480528 uncharacterized LOC134480528 Unmapped NC_086027.1 9 " 16,530,682 " " 16,553,006 " +

134480529 LOC134480529 uncharacterized LOC134480529 Unmapped NC_086027.1 9 " 16,583,786 " " 16,607,576 " -

134480533 LOC134480533 uncharacterized LOC134480533 Unmapped NC_086027.1 9 " 16,957,477 " " 16,979,282 " -

134480531 LOC134480531 uncharacterized LOC134480531 Unmapped NC_086027.1 9 " 17,004,230 " " 17,013,234 " -

134480530 LOC134480530 uncharacterized LOC134480530 Unmapped NC_086027.1 9 " 17,059,617 " " 17,081,794 " -

134480544 LOC134480544 uncharacterized LOC134480544 Unmapped NC_086027.1 9 " 17,382,262 " " 17,431,792 " +

134480545 LOC134480545 uncharacterized LOC134480545 Unmapped NC_086027.1 9 " 17,479,666 " " 17,487,840 " +

134480548 LOC134480548 disks large homolog 5-like Unmapped NC_086027.1 9 " 17,488,609 " " 17,495,371 " +

134480536 LOC134480536 uncharacterized LOC134480536 Unmapped NC_086027.1 9 " 17,630,969 " " 17,639,811 " +

134480547 LOC134480547 uncharacterized LOC134480547 Unmapped NC_086027.1 9 " 17,712,895 " " 17,721,804 " +

134480543 LOC134480543 uncharacterized LOC134480543 Unmapped NC_086027.1 9 " 17,802,110 " " 17,857,368 " +

134480541 LOC134480541 uncharacterized LOC134480541 Unmapped NC_086027.1 9 " 17,802,214 " " 17,822,998 " +

134480539 LOC134480539 uncharacterized LOC134480539 Unmapped NC_086027.1 9 " 17,875,096 " " 17,903,841 " +

134478914 LOC134478914 uncharacterized LOC134478914 Unmapped NC_086027.1 9 " 17,945,042 " " 17,953,379 " +

134480535 LOC134480535 uncharacterized LOC134480535 Unmapped NC_086027.1 9 " 17,963,959 " " 18,019,031 " +

134480542 LOC134480542 uncharacterized LOC134480542 Unmapped NC_086027.1 9 " 17,966,503 " " 17,985,069 " +

134480538 LOC134480538 uncharacterized LOC134480538 Unmapped NC_086027.1 9 " 18,049,175 " " 18,057,526 " +

134480546 LOC134480546 uncharacterized LOC134480546 Unmapped NC_086027.1 9 " 18,071,567 " " 18,092,752 " +

134480551 LOC134480551 cAMP-dependent protein kinase inhibitor gamma-like Novel NC_086027.1 9 " 20,829,527 " " 20,830,049 " +

134480557 LOC134480557 tetra-peptide repeat homeobox-like protein Novel NC_086027.1 9 " 23,113,808 " " 23,115,316 " +

134480279 LOC134480279 igE-binding protein-like Novel NC_086027.1 9 " 28,552,330 " " 28,552,923 " -

134480568 C9H2orf15 chromosome 9 C2orf15 homolog Novel NC_086027.1 9 " 47,596,762 " " 47,601,833 " +

134480358 LOC134480358 histidine-rich glycoprotein-like Novel NC_086027.1 9 " 48,270,291 " " 48,332,637 " -

134480364 LOC134480364 uncharacterized LOC134480364 Novel NC_086027.1 9 " 50,623,415 " " 50,639,965 " +

134480368 LOC134480368 uncharacterized LOC134480368 Novel NC_086027.1 9 " 57,145,937 " " 57,151,185 " -

134480579 LOC134480579 large ribosomal subunit protein eL21-like Novel NC_086027.1 9 " 68,744,703 " " 68,765,235 " -

134480271 LOC134480271 basic proline-rich protein-like Novel NC_086027.1 9 " 69,045,306 " " 69,070,449 " -

134480580 LOC134480580 peptidyl-prolyl cis-trans isomerase NIMA-interacting 4-like Novel NC_086027.1 9 " 69,164,898 " " 69,165,134 " -

134480387 LOC134480387 uncharacterized LOC134480387 Novel NC_086027.1 9 " 83,906,212 " " 83,907,890 " +

134480388 LOC134480388 uncharacterized LOC134480388 Novel NC_086027.1 9 " 84,624,528 " " 84,629,576 " -

134480296 Ccdc195 coiled-coil domain containing 195 Novel NC_086027.1 9 " 89,214,914 " " 89,229,618 " -

134480597 LOC134480597 small cysteine and glycine repeat-containing protein 6-like Novel NC_086027.1 9 " 91,504,381 " " 91,504,815 " -

134480401 LOC134480401 keratin-associated protein 5-2-like Novel NC_086027.1 9 " 91,639,351 " " 91,656,884 " +

134480297 LOC134480297 small cysteine and glycine repeat-containing protein 6-like Novel NC_086027.1 9 " 91,660,440 " " 91,660,910 " -

134480298 LOC134480298 keratin-associated protein 5-2-like Novel NC_086027.1 9 " 91,713,901 " " 91,715,112 " +

134480299 LOC134480299 small cysteine and glycine repeat-containing protein 6-like Novel NC_086027.1 9 " 91,767,115 " " 91,768,197 " -

134480403 LOC134480403 uncharacterized LOC134480403 Novel NC_086027.1 9 " 95,275,421 " " 95,278,942 " +

134480302 LOC134480302 large ribosomal subunit protein eL21-like Novel NC_086027.1 9 " 97,446,744 " " 97,447,915 " -

134480421 LOC134480421 uncharacterized LOC134480421 Novel NC_086027.1 9 " 104,895,640 " " 104,901,361 " -

134480273 LOC134480273 large ribosomal subunit protein eL21-like Novel NC_086027.1 9 " 116,907,413 " " 116,907,915 " -

134480626 LOC134480626 zinc finger protein 431-like Novel NC_086027.1 9 " 121,105,334 " " 121,123,219 " +

134480627 LOC134480627 zinc finger protein 431-like Unmapped NC_086027.1 9 " 121,266,414 " " 121,308,237 " +

134478907 LOC134478907 zinc finger protein 431-like Unmapped NC_086027.1 9 " 121,328,245 " " 121,358,292 " +

134480434 LOC134480434 zinc finger protein 431-like Novel NC_086027.1 9 " 121,545,176 " " 121,559,170 " +

134480685 LOC134480685 histidine-rich glycoprotein-like Novel NC_086028.1 10 " 31,388,172 " " 31,397,713 " +

134480785 LOC134480785 putative uncharacterized protein MSANTD5 Novel NC_086028.1 10 " 36,012,744 " " 36,017,777 " -

134480731 LOC134480731 uncharacterized LOC134480731 Novel NC_086028.1 10 " 53,822,886 " " 53,825,241 " +

134480834 LOC134480834 uncharacterized histidine-rich protein DDB_G0274557-like Novel NC_086028.1 10 " 66,550,779 " " 66,571,018 " +

134480843 LOC134480843 large ribosomal subunit protein eL21-like Novel NC_086028.1 10 " 70,608,169 " " 71,676,378 " -

134480733 LOC134480733 uncharacterized histidine-rich protein DDB_G0274557-like Novel NC_086028.1 10 " 72,227,120 " " 72,237,574 " -

134480734 LOC134480734 elongin-B-like Novel NC_086028.1 10 " 74,240,680 " " 74,241,020 " -

134480635 Smim36 small integral membrane protein 36 Novel NC_086028.1 10 " 75,502,893 " " 75,503,420 " +

134480898 LOC134480898 glyceraldehyde-3-phosphate dehydrogenase-like Novel NC_086028.1 10 " 99,312,710 " " 99,314,761 " -

134480907 LOC134480907 putative protein CRIPAK Novel NC_086028.1 10 " 102,031,716 " " 102,033,728 " -

134481045 LOC134481045 uncharacterized LOC134481045 Novel NC_086029.1 11 " 243,264 " " 245,557 " -

134478852 LOC134478852 Y-linked testis-specific protein 1-like Unmapped NC_086029.1 11 " 1,188,684 " " 1,192,637 " +

134481110 LOC134481110 Y-linked testis-specific protein 1-like Unmapped NC_086029.1 11 " 1,517,889 " " 1,520,387 " +

134481111 LOC134481111 Y-linked testis-specific protein 1-like Unmapped NC_086029.1 11 " 1,583,944 " " 1,584,808 " +

134481112 LOC134481112 Y-linked testis-specific protein 1-like Unmapped NC_086029.1 11 " 1,722,073 " " 1,724,065 " +

134481114 LOC134481114 Y-linked testis-specific protein 1-like Unmapped NC_086029.1 11 " 2,397,747 " " 2,399,934 " +

134481117 LOC134481117 Y-linked testis-specific protein 1-like Unmapped NC_086029.1 11 " 3,243,527 " " 3,244,507 " +

134481119 LOC134481119 Y-linked testis-specific protein 1-like Unmapped NC_086029.1 11 " 4,062,579 " " 4,064,800 " +

134481123 LOC134481123 Y-linked testis-specific protein 1-like Unmapped NC_086029.1 11 " 5,156,381 " " 5,158,568 " +

134480940 LOC134480940 Y-linked testis-specific protein 1-like Unmapped NC_086029.1 11 " 6,002,137 " " 6,003,213 " +

134481043 LOC134481043 Y-linked testis-specific protein 1-like Unmapped NC_086029.1 11 " 6,804,540 " " 6,805,449 " +

134481125 LOC134481125 Y-linked testis-specific protein 1-like Unmapped NC_086029.1 11 " 6,869,429 " " 6,870,717 " +

134481126 LOC134481126 Y-linked testis-specific protein 1-like Unmapped NC_086029.1 11 " 7,004,937 " " 7,007,059 " +

134480950 LOC134480950 igE-binding protein-like Novel NC_086029.1 11 " 25,680,238 " " 25,686,423 " -

134480972 LOC134480972 uncharacterized LOC134480972 Novel NC_086029.1 11 " 43,071,595 " " 43,105,471 " +

134480973 Smim34 small integral membrane protein 34 Novel NC_086029.1 11 " 45,043,059 " " 45,044,349 " -

134481039 LOC134481039 uncharacterized LOC134481039 Novel NC_086029.1 11 " 56,964,403 " " 56,975,695 " -

134480995 LOC134480995 dnaJ homolog subfamily B member 6-like Novel NC_086029.1 11 " 64,985,964 " " 64,986,339 " +

134480925 C11H3orf85 chromosome 11 C3orf85 homolog Novel NC_086029.1 11 " 65,871,798 " " 65,883,497 " +

134480933 LOC134480933 WAS/WASL-interacting protein family member 1-like Novel NC_086029.1 11 " 80,888,122 " " 80,933,707 " +

134481084 LOC134481084 uncharacterized LOC134481084 Novel NC_086029.1 11 " 81,481,896 " " 81,487,457 " +

134481087 LOC134481087 UBX domain protein 7 Novel NC_086029.1 11 " 81,903,235 " " 81,920,998 " -

134481033 LOC134481033 immunoglobulin lambda-1 light chain-like Novel NC_086029.1 11 " 95,059,050 " " 95,416,299 " +

134481314 LOC134481314 igE-binding protein-like Novel NC_086030.1 12 " 339,477 " " 341,389 " +

134481222 LOC134481222 uncharacterized LOC134481222 Unmapped NC_086030.1 12 " 1,294,592 " " 1,302,761 " -

134481229 LOC134481229 uncharacterized LOC134481229 Unmapped NC_086030.1 12 " 1,653,905 " " 1,723,465 " +

134481223 LOC134481223 endogenous retrovirus group K member 7 Pro protein-like Unmapped NC_086030.1 12 " 3,021,938 " " 3,022,705 " +

134481246 LOC134481246 ubiquitin-conjugating enzyme E2 variant 1-like Unmapped NC_086030.1 12 " 3,793,839 " " 3,813,177 " -

134481320 LOC134481320 endogenous retrovirus group K member 8 Gag polyprotein-like Novel NC_086030.1 12 " 14,149,838 " " 14,158,413 " +

134481162 LOC134481162 igE-binding protein-like Novel NC_086030.1 12 " 22,622,737 " " 22,624,530 " +

134481163 LOC134481163 uncharacterized LOC134481163 Unmapped NC_086030.1 12 " 22,782,215 " " 22,790,503 " +

134481328 LOC134481328 paired immunoglobulin-like type 2 receptor beta Unmapped NC_086030.1 12 " 23,089,294 " " 23,095,376 " -

134481322 LOC134481322 paired immunoglobulin-like type 2 receptor beta Unmapped NC_086030.1 12 " 23,138,856 " " 23,151,423 " +

134478917 LOC134478917 paired immunoglobulin-like type 2 receptor beta Unmapped NC_086030.1 12 " 23,294,854 " " 23,302,242 " -

134481329 LOC134481329 paired immunoglobulin-like type 2 receptor beta Novel NC_086030.1 12 " 23,792,410 " " 23,798,400 " -

134481331 LOC134481331 paired immunoglobulin-like type 2 receptor beta Novel NC_086030.1 12 " 23,876,301 " " 23,882,297 " -

134478844 LOC134478844 paired immunoglobulin-like type 2 receptor beta-2 Unmapped NC_086030.1 12 " 24,270,974 " " 24,284,489 " -

134481333 LOC134481333 Y-linked testis-specific protein 1-like Unmapped NC_086030.1 12 " 36,432,788 " " 36,435,021 " +

134481613 LOC134481613 uncharacterized LOC134481613 Novel NC_086031.1 13 " 11,228,799 " " 11,233,438 " +

134481476 LOC134481476 uncharacterized LOC134481476 Novel NC_086031.1 13 " 25,825,850 " " 25,826,930 " -

134481478 LOC134481478 large ribosomal subunit protein eL21 Novel NC_086031.1 13 " 26,910,650 " " 26,911,247 " -

134481616 LOC134481616 oocyte zinc finger protein XlCOF6-like Novel NC_086031.1 13 " 31,656,882 " " 31,659,820 " +

134481483 LOC134481483 histone H3.v1-like Novel NC_086031.1 13 " 35,102,897 " " 35,132,028 " +

134481487 LOC134481487 protein NYNRIN-like Novel NC_086031.1 13 " 42,480,302 " " 42,482,768 " -

134481491 LOC134481491 uncharacterized LOC134481491 Novel NC_086031.1 13 " 45,556,118 " " 45,560,569 " -

134481496 Blacat1 BLACAT1 overlapping LEMD1 locus Novel NC_086031.1 13 " 46,189,091 " " 46,202,506 " +

134481618 LOC134481618 uncharacterized LOC134481618 Novel NC_086031.1 13 " 50,769,244 " " 50,776,503 " +

134481504 LOC134481504 uncharacterized LOC134481504 Novel NC_086031.1 13 " 57,276,663 " " 57,281,909 " -

134481513 LOC134481513 uncharacterized LOC134481513 Novel NC_086031.1 13 " 64,933,517 " " 64,942,858 " +

134481532 LOC134481532 low affinity immunoglobulin gamma Fc region receptor III Unmapped NC_086031.1 13 " 85,922,401 " " 85,931,663 " -

134481533 LOC134481533 uncharacterized LOC134481533 Novel NC_086031.1 13 " 87,021,600 " " 87,025,320 " +

134481594 LOC134481594 histone acetyltransferase KAT2B-like Novel NC_086031.1 13 " 89,663,494 " " 89,665,833 " -

134481535 C13H1orf202 chromosome 13 C1orf202 homolog Novel NC_086031.1 13 " 92,561,770 " " 92,562,901 " -

134481607 LOC134481607 glutamic acid-rich protein-like Novel NC_086031.1 13 " 95,546,546 " " 95,549,592 " -

134481463 LOC134481463 large ribosomal subunit protein eL29-like Novel NC_086031.1 13 " 101,566,744 " " 101,567,091 " +

134481888 LOC134481888 vomeronasal type-2 receptor 116-like Unmapped NC_086032.1 14 " 855,633 " " 864,314 " -

134481696 LOC134481696 keratin-associated protein 10-6-like Novel NC_086032.1 14 " 3,369,731 " " 3,392,687 " +

134481885 LOC134481885 protein NYNRIN-like Novel NC_086032.1 14 " 14,473,254 " " 14,490,587 " -

134481886 LOC134481886 protein NYNRIN-like Novel NC_086032.1 14 " 14,766,250 " " 14,783,579 " -

134481896 LOC134481896 PRAME family member 20-like Unmapped NC_086032.1 14 " 14,884,961 " " 14,887,615 " +

134481897 LOC134481897 PRAME family member 8-like Unmapped NC_086032.1 14 " 14,956,631 " " 14,959,305 " +

134481831 LOC134481831 endotoxic shock protective protein U9-ORF-like Novel NC_086032.1 14 " 16,127,269 " " 16,131,720 " +

134481726 LOC134481726 C-X-C motif chemokine 15-like Novel NC_086032.1 14 " 17,551,591 " " 17,566,187 " -

134481833 LOC134481833 mucin-5AC-like Novel NC_086032.1 14 " 20,399,100 " " 20,417,326 " -

134478834 LOC134478834 UDP-glucuronosyltransferase 2B2 Unmapped NC_086032.1 14 " 20,910,157 " " 20,945,116 " +

134481742 LOC134481742 uncharacterized LOC134481742 Novel NC_086032.1 14 " 33,672,841 " " 33,688,686 " +

134481848 LOC134481848 uncharacterized LOC134481848 Novel NC_086032.1 14 " 43,278,548 " " 43,281,180 " +

134481688 LOC134481688 uncharacterized LOC134481688 Novel NC_086032.1 14 " 69,227,444 " " 69,250,715 " -

134481692 C14H22orf31 chromosome 14 C22orf31 homolog Novel NC_086032.1 14 " 84,373,414 " " 84,374,948 " +

134481801 LOC134481801 uncharacterized LOC134481801 Novel NC_086032.1 14 " 100,593,998 " " 100,600,052 " -

134482073 LOC134482073 disks large homolog 5-like Unmapped NC_086033.1 15 " 14,594 " " 21,936 " -

134482237 LOC134482237 small integral membrane protein 14-like Unmapped NC_086033.1 15 " 29,973 " " 30,272 " +

134482167 LOC134482167 uncharacterized LOC134482167 Unmapped NC_086033.1 15 " 4,675,553 " " 4,682,786 " -

134482238 LOC134482238 small integral membrane protein 14-like Unmapped NC_086033.1 15 " 4,690,913 " " 4,691,212 " +

134481916 LOC134481916 small integral membrane protein 14-like Unmapped NC_086033.1 15 " 4,729,424 " " 4,729,732 " +

134481917 LOC134481917 uncharacterized LOC134481917 Novel NC_086033.1 15 " 4,760,032 " " 4,767,275 " -

134482240 LOC134482240 small integral membrane protein 14-like Unmapped NC_086033.1 15 " 4,775,395 " " 4,775,694 " +

134481924 LOC134481924 uncharacterized LOC134481924 Unmapped NC_086033.1 15 " 4,874,461 " " 4,881,706 " -

134482241 LOC134482241 small integral membrane protein 14-like Unmapped NC_086033.1 15 " 4,989,378 " " 4,989,677 " +

134481925 LOC134481925 uncharacterized LOC134481925 Unmapped NC_086033.1 15 " 5,000,634 " " 5,004,012 " -

134482168 LOC134482168 disks large homolog 5-like Unmapped NC_086033.1 15 " 5,042,716 " " 5,049,933 " -

134481923 LOC134481923 uncharacterized LOC134481923 Novel NC_086033.1 15 " 5,079,791 " " 5,087,017 " -

134482169 LOC134482169 small integral membrane protein 14-like Unmapped NC_086033.1 15 " 5,095,398 " " 5,095,717 " +

134481926 LOC134481926 uncharacterized LOC134481926 Unmapped NC_086033.1 15 " 5,115,712 " " 5,122,970 " -

134482170 LOC134482170 small integral membrane protein 14-like Unmapped NC_086033.1 15 " 5,131,090 " " 5,131,409 " +

134478849 LOC134478849 uncharacterized LOC134478849 Unmapped NC_086033.1 15 " 5,291,405 " " 5,301,873 " -

134482244 LOC134482244 small integral membrane protein 14-like Unmapped NC_086033.1 15 " 5,363,808 " " 5,364,107 " +

134481928 LOC134481928 disks large homolog 5-like Unmapped NC_086033.1 15 " 5,389,391 " " 5,396,611 " -

134482172 LOC134482172 small integral membrane protein 14-like Unmapped NC_086033.1 15 " 5,404,762 " " 5,405,070 " +

134481929 LOC134481929 uncharacterized LOC134481929 Unmapped NC_086033.1 15 " 5,417,632 " " 5,430,277 " -

134481930 LOC134481930 uncharacterized LOC134481930 Unmapped NC_086033.1 15 " 5,433,697 " " 5,440,920 " -

134482173 LOC134482173 uncharacterized LOC134482173 Unmapped NC_086033.1 15 " 5,473,554 " " 5,480,753 " -

134481931 LOC134481931 disks large homolog 5-like Unmapped NC_086033.1 15 " 5,513,304 " " 5,520,501 " -

134481918 LOC134481918 uncharacterized LOC134481918 Novel NC_086033.1 15 " 5,558,978 " " 5,566,196 " -

134482175 LOC134482175 small integral membrane protein 14-like Unmapped NC_086033.1 15 " 5,574,393 " " 5,574,712 " +

134482245 LOC134482245 small integral membrane protein 14-like Unmapped NC_086033.1 15 " 5,619,994 " " 5,620,320 " +

134481919 LOC134481919 disks large homolog 5-like Unmapped NC_086033.1 15 " 5,644,927 " " 5,655,491 " -

134482246 LOC134482246 small integral membrane protein 14-like Unmapped NC_086033.1 15 " 5,755,780 " " 5,756,079 " +

134481934 LOC134481934 uncharacterized LOC134481934 Unmapped NC_086033.1 15 " 5,780,411 " " 5,787,685 " -

497084 Spetex2b Spetex-2B protein Unmapped NC_086033.1 15 " 5,806,975 " " 5,810,125 " -

134481935 LOC134481935 disks large homolog 5-like Unmapped NC_086033.1 15 " 5,857,088 " " 5,864,361 " -

364260 Spetex2d Spetex-2D protein Unmapped NC_086033.1 15 " 5,880,984 " " 5,883,252 " -

134481936 LOC134481936 disks large homolog 5-like Unmapped NC_086033.1 15 " 6,047,251 " " 6,055,301 " -

134481937 LOC134481937 disks large homolog 5-like Unmapped NC_086033.1 15 " 6,083,875 " " 6,091,132 " -

134482248 LOC134482248 small integral membrane protein 14-like Unmapped NC_086033.1 15 " 6,099,265 " " 6,099,564 " +

134481938 LOC134481938 uncharacterized LOC134481938 Unmapped NC_086033.1 15 " 6,112,153 " " 6,115,725 " -

134481939 LOC134481939 uncharacterized LOC134481939 Unmapped NC_086033.1 15 " 6,138,369 " " 6,151,014 " -

134478853 LOC134478853 uncharacterized LOC134478853 Unmapped NC_086033.1 15 " 6,154,446 " " 6,161,746 " -

134482249 LOC134482249 small integral membrane protein 14-like Unmapped NC_086033.1 15 " 6,774,995 " " 6,775,294 " +

134481941 LOC134481941 uncharacterized LOC134481941 Unmapped NC_086033.1 15 " 6,796,451 " " 6,803,282 " -

134481922 LOC134481922 uncharacterized LOC134481922 Unmapped NC_086033.1 15 " 6,811,635 " " 6,820,059 " +

134482251 LOC134482251 small integral membrane protein 14-like Unmapped NC_086033.1 15 " 6,820,118 " " 6,820,417 " +

134482178 LOC134482178 disks large homolog 5-like Unmapped NC_086033.1 15 " 6,845,201 " " 6,852,473 " -

171485 Cd99l2 CD99 molecule-like 2 Unmapped NC_086033.1 15 " 6,861,242 " " 6,906,838 " -

134481942 LOC134481942 uncharacterized LOC134481942 Unmapped NC_086033.1 15 " 6,950,499 " " 6,957,856 " +

134482252 LOC134482252 small integral membrane protein 14-like Unmapped NC_086033.1 15 " 7,024,379 " " 7,024,678 " -

134482179 LOC134482179 small integral membrane protein 14-like Unmapped NC_086033.1 15 " 7,070,597 " " 7,071,100 " -

134481943 LOC134481943 uncharacterized LOC134481943 Novel NC_086033.1 15 " 7,118,760 " " 7,126,007 " +

134482254 LOC134482254 uncharacterized LOC134482254 Unmapped NC_086033.1 15 " 7,178,998 " " 7,194,756 " +

134482184 LOC134482184 ribosome biogenesis regulatory protein homolog Novel NC_086033.1 15 " 19,811,495 " " 19,812,480 " -

134481949 LOC134481949 disks large homolog 5-like Unmapped NC_086033.1 15 " 19,836,657 " " 19,844,001 " +

134478884 LOC134478884 disks large homolog 5-like Unmapped NC_086033.1 15 " 19,859,800 " " 19,867,007 " +

134481951 LOC134481951 disks large homolog 5-like Unmapped NC_086033.1 15 " 20,401,096 " " 20,408,272 " -

134482260 LOC134482260 disks large homolog 5-like Unmapped NC_086033.1 15 " 20,428,955 " " 20,436,142 " -

134481952 LOC134481952 disks large homolog 5-like Unmapped NC_086033.1 15 " 20,458,773 " " 20,466,196 " -

134481953 LOC134481953 disks large homolog 5-like Unmapped NC_086033.1 15 " 20,481,106 " " 20,488,515 " -

134482089 LOC134482089 uncharacterized LOC134482089 Novel NC_086033.1 15 " 20,665,778 " " 20,687,868 " -

134482292 LOC134482292 uncharacterized LOC134482292 Novel NC_086033.1 15 " 29,060,623 " " 29,080,424 " +

134482030 LOC134482030 basement membrane-specific heparan sulfate proteoglycan core protein-like Unmapped NC_086033.1 15 " 29,630,032 " " 29,641,058 " +

134482096 LOC134482096 uncharacterized LOC134482096 Novel NC_086033.1 15 " 30,947,773 " " 30,952,408 " -

134482065 LOC134482065 large ribosomal subunit protein eL21-like Novel NC_086033.1 15 " 33,370,677 " " 33,371,069 " +

134482066 LOC134482066 mast cell protease 1-like Novel NC_086033.1 15 " 33,396,530 " " 33,398,899 " -

29265 Vch chymase Unmapped NC_086033.1 15 " 33,569,741 " " 33,572,295 " +

134482223 LOC134482223 mast cell protease 4-like Unmapped NC_086033.1 15 " 33,627,828 " " 33,630,724 " +

408207 Mcpt8l3 mast cell protease 8-like 3 Unmapped NC_086033.1 15 " 33,673,264 " " 33,676,288 " +

134481969 LOC134481969 granzyme-like protein 2 Unmapped NC_086033.1 15 " 33,696,036 " " 33,699,087 " +

408240 Mcpt8l2 mast cell protease 8-like 2 Unmapped NC_086033.1 15 " 33,718,389 " " 33,731,960 " +

134481973 LOC134481973 mast cell protease 1-like Unmapped NC_086033.1 15 " 33,748,215 " " 33,753,519 " +

134482224 LOC134482224 granzyme-like protein 1 Unmapped NC_086033.1 15 " 34,184,299 " " 34,187,280 " -

134482225 LOC134482225 granzyme C-like Unmapped NC_086033.1 15 " 34,222,742 " " 34,228,730 " -

134482226 LOC134482226 granzyme C-like Unmapped NC_086033.1 15 " 34,259,842 " " 34,262,432 " -

134482125 LOC134482125 PHD finger protein 11-like Unmapped NC_086033.1 15 " 37,505,639 " " 37,529,267 " -

134482139 LOC134482139 cilia- and flagella-associated protein 251-like Novel NC_086033.1 15 " 46,541,003 " " 46,559,725 " +

134482154 LOC134482154 uncharacterized LOC134482154 Novel NC_086033.1 15 " 57,881,494 " " 57,887,527 " -

134482155 LOC134482155 uncharacterized LOC134482155 Novel NC_086033.1 15 " 57,881,494 " " 58,056,713 " -

134481998 LOC134481998 uncharacterized LOC134481998 Novel NC_086033.1 15 " 69,065,301 " " 69,158,676 " +

134482310 LOC134482310 uncharacterized LOC134482310 Novel NC_086034.1 16 " 150,929 " " 550,413 " +

134482321 LOC134482321 ral guanine nucleotide dissociation stimulator-like Novel NC_086034.1 16 " 11,107,831 " " 11,109,991 " -

134482320 LOC134482320 ral guanine nucleotide dissociation stimulator-like Unmapped NC_086034.1 16 " 11,259,254 " " 11,261,485 " -

134482318 LOC134482318 ral guanine nucleotide dissociation stimulator-like Novel NC_086034.1 16 " 11,743,984 " " 11,746,172 " +

134482319 LOC134482319 ral guanine nucleotide dissociation stimulator-like Novel NC_086034.1 16 " 11,759,848 " " 11,761,999 " +

134482329 LOC134482329 ankyrin repeat domain-containing protein 7-like Unmapped NC_086034.1 16 " 20,141,724 " " 20,151,768 " +

134482331 LOC134482331 elongin-C-like Unmapped NC_086034.1 16 " 20,334,587 " " 20,334,989 " -

134482334 LOC134482334 ankyrin repeat domain-containing protein 7-like Unmapped NC_086034.1 16 " 20,347,905 " " 20,359,398 " +

134482337 LOC134482337 ankyrin repeat domain-containing protein 7-like Unmapped NC_086034.1 16 " 20,582,123 " " 20,596,067 " +

134482336 LOC134482336 uncharacterized LOC134482336 Unmapped NC_086034.1 16 " 20,607,627 " " 20,633,285 " +

134482335 LOC134482335 elongin-C-like Unmapped NC_086034.1 16 " 20,772,463 " " 20,772,880 " -

134482340 LOC134482340 ankyrin repeat domain-containing protein 7-like Unmapped NC_086034.1 16 " 20,791,234 " " 20,800,759 " +

134482339 LOC134482339 uncharacterized LOC134482339 Unmapped NC_086034.1 16 " 20,837,649 " " 20,841,258 " +

134482473 LOC134482473 elongin-C-like Unmapped NC_086034.1 16 " 20,973,872 " " 20,974,324 " -

134482474 LOC134482474 uncharacterized LOC134482474 Unmapped NC_086034.1 16 " 21,020,480 " " 21,028,061 " +

134482479 LOC134482479 elongin-C-like Unmapped NC_086034.1 16 " 21,172,800 " " 21,173,233 " -

134482480 LOC134482480 elongin-C-like Unmapped NC_086034.1 16 " 21,364,920 " " 21,365,352 " -

134482478 LOC134482478 ankyrin repeat domain-containing protein 7-like Unmapped NC_086034.1 16 " 21,376,601 " " 21,386,026 " +

134482481 LOC134482481 elongin-C-like Unmapped NC_086034.1 16 " 21,565,401 " " 21,565,885 " -

134482477 LOC134482477 ankyrin repeat domain-containing protein 7-like Novel NC_086034.1 16 " 21,617,246 " " 21,650,385 " +

134482483 LOC134482483 uncharacterized LOC134482483 Unmapped NC_086034.1 16 " 21,780,067 " " 21,797,844 " -

134482484 LOC134482484 elongin-C-like Unmapped NC_086034.1 16 " 21,831,741 " " 21,833,245 " +

134482485 LOC134482485 elongin-C-like Unmapped NC_086034.1 16 " 21,951,782 " " 21,952,182 " +

134482487 LOC134482487 ankyrin repeat domain-containing protein 7-like Novel NC_086034.1 16 " 22,126,136 " " 22,137,915 " -

134482488 LOC134482488 elongin-C-like Unmapped NC_086034.1 16 " 22,153,698 " " 22,154,117 " +

134482565 LOC134482565 uncharacterized LOC134482565 Unmapped NC_086034.1 16 " 22,360,891 " " 22,380,783 " -

134482489 LOC134482489 elongin-C-like Unmapped NC_086034.1 16 " 22,414,747 " " 22,415,199 " +

134482341 LOC134482341 uncharacterized LOC134482341 Unmapped NC_086034.1 16 " 22,520,209 " " 22,526,937 " -

134482342 LOC134482342 uncharacterized LOC134482342 Unmapped NC_086034.1 16 " 22,548,212 " " 22,568,095 " -

134482566 LOC134482566 mucin-16-like Unmapped NC_086034.1 16 " 22,766,305 " " 22,786,195 " -

134482343 LOC134482343 elongin-C-like Unmapped NC_086034.1 16 " 22,820,140 " " 22,820,592 " +

134482345 LOC134482345 uncharacterized LOC134482345 Unmapped NC_086034.1 16 " 22,952,827 " " 22,974,107 " -

134482344 LOC134482344 elongin-C-like Unmapped NC_086034.1 16 " 23,015,702 " " 23,016,154 " +

134482347 LOC134482347 elongin-C-like Unmapped NC_086034.1 16 " 23,218,855 " " 23,219,272 " +

134482567 LOC134482567 uncharacterized LOC134482567 Unmapped NC_086034.1 16 " 23,563,371 " " 23,584,086 " -

134482351 LOC134482351 elongin-C-like Unmapped NC_086034.1 16 " 23,617,299 " " 23,617,751 " +

134482353 LOC134482353 uncharacterized LOC134482353 Unmapped NC_086034.1 16 " 23,836,376 " " 23,855,402 " -

134482354 LOC134482354 elongin-C-like Unmapped NC_086034.1 16 " 23,886,793 " " 23,887,245 " +

134482359 LOC134482359 uncharacterized LOC134482359 Unmapped NC_086034.1 16 " 24,019,516 " " 24,038,875 " -

134482362 LOC134482362 elongin-C-like Unmapped NC_086034.1 16 " 24,082,016 " " 24,082,468 " +

134482356 LOC134482356 elongin-C-like Unmapped NC_086034.1 16 " 24,603,508 " " 24,603,934 " +

134482363 LOC134482363 elongin-C-like Unmapped NC_086034.1 16 " 24,808,024 " " 24,808,449 " +

134482357 LOC134482357 uncharacterized LOC134482357 Unmapped NC_086034.1 16 " 24,939,239 " " 24,961,312 " -

134482358 LOC134482358 elongin-C-like Unmapped NC_086034.1 16 " 25,002,871 " " 25,003,329 " +

134482491 LOC134482491 uncharacterized LOC134482491 Novel NC_086034.1 16 " 28,899,887 " " 28,905,044 " +

134478918 LOC134478918 probable ATP-dependent RNA helicase DDX60 Unmapped NC_086034.1 16 " 32,831,588 " " 32,954,954 " -

134482497 LOC134482497 uncharacterized protein DDB_G0271670-like Novel NC_086034.1 16 " 50,575,760 " " 50,589,335 " -

134482401 LOC134482401 uncharacterized LOC134482401 Novel NC_086034.1 16 " 65,634,987 " " 65,641,085 " +

134482404 LOC134482404 uncharacterized LOC134482404 Novel NC_086034.1 16 " 70,897,644 " " 70,903,755 " -

134482520 LOC134482520 splicing regulatory glutamine/lysine-rich protein 1-like Novel NC_086034.1 16 " 75,693,287 " " 75,700,122 " +

134482433 LOC134482433 ubiquitin-like FUBI-ribosomal protein eS30 fusion protein Novel NC_086034.1 16 " 82,452,162 " " 82,453,735 " -

134482810 LOC134482810 spermatogenesis-associated protein 31A3-like Novel NC_086035.1 17 " 11,306,951 " " 11,314,244 " +

134482811 LOC134482811 spermatogenesis-associated protein 31A3-like Novel NC_086035.1 17 " 11,599,888 " " 11,608,812 " +

134482812 LOC134482812 spermatogenesis-associated protein 31A3-like Novel NC_086035.1 17 " 11,711,274 " " 11,717,448 " +

134482813 LOC134482813 spermatogenesis-associated protein 31A3-like Novel NC_086035.1 17 " 11,771,723 " " 11,778,684 " +

134482688 LOC134482688 spermatogenesis-associated protein 31-like Novel NC_086035.1 17 " 14,690,752 " " 14,697,012 " +

134482689 LOC134482689 spermatogenesis-associated protein 31-like Unmapped NC_086035.1 17 " 14,723,570 " " 14,729,053 " +

134482684 LOC134482684 spermatogenesis-associated protein 31E1-like Novel NC_086035.1 17 " 14,947,053 " " 14,952,609 " +

134482685 LOC134482685 uncharacterized LOC134482685 Novel NC_086035.1 17 " 15,099,085 " " 15,105,593 " +

134482842 LOC134482842 putative protein CRIPAK Novel NC_086035.1 17 " 26,396,407 " " 26,401,535 " +

53950 Rpl-1 chorionic somatomammotropin hormone 1 Unmapped NC_086035.1 17 " 38,041,402 " " 38,047,329 " -

134482774 LOC134482774 prolactin-3D1-like Unmapped NC_086035.1 17 " 38,110,332 " " 38,116,290 " -

134482775 LOC134482775 prolactin-3D1-like Unmapped NC_086035.1 17 " 38,184,825 " " 38,190,787 " -

134482856 LOC134482856 serine/threonine-protein kinase Kist-like Unmapped NC_086035.1 17 " 42,859,198 " " 42,861,210 " +

134482717 LOC134482717 uncharacterized LOC134482717 Novel NC_086035.1 17 " 48,246,056 " " 48,247,273 " +

134482632 LOC134482632 isopentenyl-diphosphate delta-isomerase 2-like Unmapped NC_086035.1 17 " 66,132,009 " " 66,133,335 " +

134482731 LOC134482731 uncharacterized LOC134482731 Unmapped NC_086035.1 17 " 66,202,156 " " 66,212,005 " +

134482634 LOC134482634 isopentenyl-diphosphate delta-isomerase 2-like Unmapped NC_086035.1 17 " 66,293,004 " " 66,295,579 " -

134482635 LOC134482635 isopentenyl-diphosphate delta-isomerase 2-like Unmapped NC_086035.1 17 " 66,307,221 " " 66,311,435 " +

134482791 LOC134482791 sperm motility kinase X-like Unmapped NC_086035.1 17 " 90,510,657 " " 90,513,287 " -

134482639 LOC134482639 sperm motility kinase X-like Unmapped NC_086035.1 17 " 90,691,911 " " 90,695,721 " -

134482641 LOC134482641 sperm motility kinase X-like Unmapped NC_086035.1 17 " 90,853,487 " " 90,861,820 " -

134482642 LOC134482642 sperm motility kinase X-like Unmapped NC_086035.1 17 " 90,920,675 " " 90,947,052 " -

134482621 LOC134482621 sperm motility kinase X-like Unmapped NC_086035.1 17 " 91,058,554 " " 91,064,986 " -

134482622 LOC134482622 sperm motility kinase X-like Unmapped NC_086035.1 17 " 91,517,444 " " 91,527,202 " -

134482792 LOC134482792 sperm motility kinase X-like Unmapped NC_086035.1 17 " 91,597,941 " " 91,607,313 " -

134482793 LOC134482793 sperm motility kinase X-like Unmapped NC_086035.1 17 " 91,727,300 " " 91,728,678 " -

134482788 LOC134482788 sperm motility kinase X-like Unmapped NC_086035.1 17 " 91,773,952 " " 91,775,277 " -

134482643 LOC134482643 sperm motility kinase X-like Unmapped NC_086035.1 17 " 91,809,768 " " 91,814,930 " -

134482644 LOC134482644 sperm motility kinase X-like Unmapped NC_086035.1 17 " 91,928,882 " " 91,940,755 " -

134482646 LOC134482646 sperm motility kinase X-like Unmapped NC_086035.1 17 " 91,973,680 " " 91,978,955 " -

134482623 LOC134482623 small integral membrane protein 13 Unmapped NC_086035.1 17 " 91,985,315 " " 91,985,855 " +

134482789 LOC134482789 sperm motility kinase X-like Unmapped NC_086035.1 17 " 92,107,635 " " 92,109,789 " -

134478913 LOC134478913 sperm motility kinase X-like Unmapped NC_086035.1 17 " 92,227,077 " " 92,303,816 " -

134482648 LOC134482648 sperm motility kinase X-like Unmapped NC_086035.1 17 " 92,541,136 " " 92,550,892 " -

134482649 LOC134482649 sperm motility kinase X-like Unmapped NC_086035.1 17 " 92,588,416 " " 92,614,458 " -

134478886 LOC134478886 sperm motility kinase X-like Unmapped NC_086035.1 17 " 92,664,862 " " 92,667,367 " -

134482990 LOC134482990 zinc finger protein 320-like Unmapped NC_086036.1 18 " 495,929 " " 497,253 " +

134483081 LOC134483081 zinc finger protein 665-like Unmapped NC_086036.1 18 " 667,524 " " 686,421 " +

134482899 LOC134482899 histidine-rich glycoprotein-like Novel NC_086036.1 18 " 2,025,069 " " 2,042,217 " -

134482993 LOC134482993 uncharacterized LOC134482993 Novel NC_086036.1 18 " 2,749,534 " " 2,759,483 " +

134482998 LOC134482998 uncharacterized LOC134482998 Novel NC_086036.1 18 " 16,027,835 " " 16,028,835 " +

134482978 LOC134482978 anaphase-promoting complex subunit 6-like Novel NC_086036.1 18 " 18,524,745 " " 18,527,667 " -

134483001 LOC134483001 uncharacterized LOC134483001 Novel NC_086036.1 18 " 19,696,465 " " 19,704,574 " -

134483011 LOC134483011 igE-binding protein-like Novel NC_086036.1 18 " 32,945,160 " " 33,111,524 " +

134482939 LOC134482939 rhox homeobox family member 1-like Novel NC_086036.1 18 " 35,647,066 " " 35,650,237 " -

134483021 LOC134483021 uncharacterized LOC134483021 Novel NC_086036.1 18 " 48,749,100 " " 48,755,165 " -

134483089 LOC134483089 glyceraldehyde-3-phosphate dehydrogenase-like Novel NC_086036.1 18 " 51,489,157 " " 51,489,760 " -

307415 RGD1309362 similar to interferon-inducible GTPase Novel NC_086036.1 18 " 55,943,741 " " 55,969,375 " +

134483037 LOC134483037 interferon-inducible GTPase 1-like Unmapped NC_086036.1 18 " 55,993,009 " " 55,995,850 " +

134482986 LOC134482986 uncharacterized LOC134482986 Novel NC_086036.1 18 " 66,305,191 " " 66,317,440 " -

134483058 LOC134483058 uncharacterized protein DDB_G0292186-like Novel NC_086036.1 18 " 73,239,122 " " 73,252,074 " -

134483077 LOC134483077 uncharacterized LOC134483077 Novel NC_086036.1 18 " 86,103,641 " " 86,106,942 " -

134483112 LOC134483112 IQ domain-containing protein M-like Novel NC_086037.1 19 " 13,695,626 " " 13,916,521 " +

134483113 LOC134483113 septin-7-like Unmapped NC_086037.1 19 " 13,827,500 " " 13,829,137 " -

134483525 LOC134483525 disks large homolog 5-like Unmapped NC_086037.1 19 " 13,921,864 " " 13,926,522 " -

134483526 LOC134483526 disks large homolog 5-like Unmapped NC_086037.1 19 " 13,943,164 " " 13,945,975 " +

134483341 LOC134483341 disks large homolog 5-like Unmapped NC_086037.1 19 " 13,963,901 " " 13,967,884 " -

134483340 LOC134483340 disks large homolog 5-like Unmapped NC_086037.1 19 " 13,988,297 " " 13,993,111 " +

134483342 LOC134483342 uncharacterized LOC134483342 Unmapped NC_086037.1 19 " 14,002,342 " " 14,005,260 " -

134483674 LOC134483674 disks large homolog 5-like Unmapped NC_086037.1 19 " 14,011,658 " " 14,027,846 " +

134483114 LOC134483114 uncharacterized LOC134483114 Unmapped NC_086037.1 19 " 14,120,409 " " 14,124,383 " -

134483115 LOC134483115 disks large homolog 5-like Unmapped NC_086037.1 19 " 14,143,111 " " 14,146,812 " +

134483116 LOC134483116 uncharacterized LOC134483116 Unmapped NC_086037.1 19 " 14,151,863 " " 14,159,492 " +

134478848 LOC134478848 uncharacterized LOC134478848 Unmapped NC_086037.1 19 " 14,164,367 " " 14,169,080 " -

134483118 LOC134483118 disks large homolog 5-like Unmapped NC_086037.1 19 " 14,185,149 " " 14,213,026 " +

134483117 LOC134483117 DNA-directed RNA polymerase II subunit GRINL1A-like Unmapped NC_086037.1 19 " 14,223,254 " " 14,224,711 " +

134483122 LOC134483122 uncharacterized LOC134483122 Unmapped NC_086037.1 19 " 14,235,450 " " 14,239,441 " -

134483129 LOC134483129 uncharacterized LOC134483129 Unmapped NC_086037.1 19 " 14,317,624 " " 14,321,593 " -

134483352 LOC134483352 disks large homolog 5-like Unmapped NC_086037.1 19 " 14,348,189 " " 14,350,166 " +

134483124 LOC134483124 DNA-directed RNA polymerase II subunit GRINL1A-like Unmapped NC_086037.1 19 " 14,359,933 " " 14,361,089 " +

134483132 LOC134483132 disks large homolog 5-like Unmapped NC_086037.1 19 " 14,367,045 " " 14,371,566 " -

134483354 LOC134483354 disks large homolog 5-like Unmapped NC_086037.1 19 " 14,403,275 " " 14,406,421 " +

134483133 LOC134483133 uncharacterized LOC134483133 Unmapped NC_086037.1 19 " 14,458,982 " " 14,463,699 " -

134483357 LOC134483357 disks large homolog 5-like Unmapped NC_086037.1 19 " 14,481,658 " " 14,484,940 " +

134483130 LOC134483130 uncharacterized LOC134483130 Unmapped NC_086037.1 19 " 14,501,861 " " 14,505,844 " -

134483131 LOC134483131 uncharacterized LOC134483131 Unmapped NC_086037.1 19 " 14,562,149 " " 14,566,916 " -

134483135 LOC134483135 disks large homolog 5-like Unmapped NC_086037.1 19 " 14,562,864 " " 14,583,903 " +

134483125 LOC134483125 DNA-directed RNA polymerase II subunit GRINL1A-like Unmapped NC_086037.1 19 " 14,649,134 " " 14,650,216 " -

134483358 LOC134483358 disks large homolog 5-like Unmapped NC_086037.1 19 " 14,661,890 " " 14,665,648 " -

134483136 LOC134483136 disks large homolog 5-like Unmapped NC_086037.1 19 " 14,677,499 " " 14,682,735 " +

134483126 LOC134483126 uncharacterized LOC134483126 Unmapped NC_086037.1 19 " 14,714,845 " " 14,734,737 " -

134483138 LOC134483138 disks large homolog 5-like Unmapped NC_086037.1 19 " 14,774,853 " " 14,778,415 " -

134483139 LOC134483139 uncharacterized LOC134483139 Unmapped NC_086037.1 19 " 14,790,803 " " 14,794,790 " +

134483140 LOC134483140 uncharacterized LOC134483140 Unmapped NC_086037.1 19 " 14,828,136 " " 14,832,127 " +

134483531 LOC134483531 disks large homolog 5-like Unmapped NC_086037.1 19 " 14,848,229 " " 14,852,970 " -

134483373 LOC134483373 disks large homolog 5-like Unmapped NC_086037.1 19 " 14,880,829 " " 14,883,798 " +

134483142 LOC134483142 uncharacterized LOC134483142 Unmapped NC_086037.1 19 " 14,918,360 " " 14,923,021 " -

134483143 LOC134483143 disks large homolog 5-like Unmapped NC_086037.1 19 " 14,918,442 " " 14,944,138 " +

134483145 LOC134483145 uncharacterized LOC134483145 Unmapped NC_086037.1 19 " 14,991,590 " " 14,998,492 " -

134483144 LOC134483144 centrosomal protein of 135 kDa-like Unmapped NC_086037.1 19 " 15,020,780 " " 15,025,521 " -

134483146 LOC134483146 centrosomal protein of 135 kDa-like Unmapped NC_086037.1 19 " 15,039,029 " " 15,044,296 " -

134483152 LOC134483152 uncharacterized LOC134483152 Unmapped NC_086037.1 19 " 15,061,650 " " 15,818,899 " +

134483154 LOC134483154 uncharacterized LOC134483154 Unmapped NC_086037.1 19 " 15,117,243 " " 15,121,336 " -

134483158 LOC134483158 disks large homolog 5-like Unmapped NC_086037.1 19 " 15,139,870 " " 15,143,925 " +

134483147 LOC134483147 DNA-directed RNA polymerase II subunit GRINL1A-like Unmapped NC_086037.1 19 " 15,154,233 " " 15,155,531 " +

134483155 LOC134483155 disks large homolog 5-like Unmapped NC_086037.1 19 " 15,171,442 " " 15,176,012 " +

134483153 LOC134483153 uncharacterized LOC134483153 Unmapped NC_086037.1 19 " 15,193,680 " " 15,197,598 " -

134483148 LOC134483148 DNA-directed RNA polymerase II subunit GRINL1A-like Unmapped NC_086037.1 19 " 15,242,564 " " 15,244,273 " +

134483156 LOC134483156 disks large homolog 5-like Unmapped NC_086037.1 19 " 15,291,671 " " 15,340,196 " +

134483157 LOC134483157 disks large homolog 5-like Unmapped NC_086037.1 19 " 15,378,207 " " 15,382,648 " +

134483374 LOC134483374 disks large homolog 5-like Unmapped NC_086037.1 19 " 15,427,403 " " 15,430,897 " +

134483380 LOC134483380 disks large homolog 5-like Unmapped NC_086037.1 19 " 15,482,193 " " 15,485,131 " +

134483151 LOC134483151 centrosomal protein of 135 kDa-like Unmapped NC_086037.1 19 " 15,573,467 " " 15,591,486 " +

134483533 LOC134483533 disks large homolog 5-like Novel NC_086037.1 19 " 15,632,018 " " 15,639,079 " +

134483381 LOC134483381 uncharacterized LOC134483381 Unmapped NC_086037.1 19 " 15,665,072 " " 15,669,031 " +

134483382 LOC134483382 disks large homolog 5-like Unmapped NC_086037.1 19 " 15,688,667 " " 15,693,305 " -

134483383 LOC134483383 uncharacterized LOC134483383 Unmapped NC_086037.1 19 " 15,717,333 " " 15,721,443 " +

134483386 LOC134483386 disks large homolog 5-like Unmapped NC_086037.1 19 " 15,744,917 " " 15,749,599 " -

134483149 LOC134483149 DNA-directed RNA polymerase II subunit GRINL1A-like Unmapped NC_086037.1 19 " 15,781,357 " " 15,782,656 " -

134483534 LOC134483534 disks large homolog 5-like Unmapped NC_086037.1 19 " 15,794,337 " " 15,798,121 " -

134483160 LOC134483160 disks large homolog 5-like Unmapped NC_086037.1 19 " 15,836,597 " " 15,840,774 " -

134483164 LOC134483164 disks large homolog 5-like Unmapped NC_086037.1 19 " 15,901,105 " " 15,903,636 " -

134483163 LOC134483163 disks large homolog 5-like Unmapped NC_086037.1 19 " 15,920,642 " " 16,179,690 " +

134483161 LOC134483161 DNA-directed RNA polymerase II subunit GRINL1A-like Unmapped NC_086037.1 19 " 15,971,621 " " 15,972,955 " -

134483387 LOC134483387 disks large homolog 5-like Unmapped NC_086037.1 19 " 15,984,102 " " 15,988,006 " -

134483390 LOC134483390 disks large homolog 5-like Unmapped NC_086037.1 19 " 16,196,649 " " 16,201,291 " -

134483392 LOC134483392 disks large homolog 5-like Unmapped NC_086037.1 19 " 16,365,605 " " 16,368,124 " -

134483167 LOC134483167 disks large homolog 5-like Unmapped NC_086037.1 19 " 16,395,455 " " 16,400,290 " -

134483165 LOC134483165 IQ domain-containing protein M-like Novel NC_086037.1 19 " 16,430,392 " " 16,680,380 " -

134483166 LOC134483166 septin-7-like Unmapped NC_086037.1 19 " 16,546,329 " " 16,548,798 " +

134483169 LOC134483169 disks large homolog 5-like Unmapped NC_086037.1 19 " 16,712,283 " " 16,740,882 " -

134483170 LOC134483170 disks large homolog 5-like Unmapped NC_086037.1 19 " 16,789,877 " " 16,795,308 " -

134483172 LOC134483172 disks large homolog 5-like Unmapped NC_086037.1 19 " 16,810,124 " " 16,814,912 " +

134483171 LOC134483171 DNA-directed RNA polymerase II subunit GRINL1A-like Unmapped NC_086037.1 19 " 16,818,855 " " 16,821,952 " +

134483398 LOC134483398 uncharacterized LOC134483398 Unmapped NC_086037.1 19 " 16,860,842 " " 16,864,867 " -

134483399 LOC134483399 disks large homolog 5-like Unmapped NC_086037.1 19 " 16,890,927 " " 16,893,240 " +

134483173 LOC134483173 uncharacterized LOC134483173 Unmapped NC_086037.1 19 " 16,910,973 " " 16,915,199 " -

134483175 LOC134483175 uncharacterized LOC134483175 Unmapped NC_086037.1 19 " 17,002,710 " " 17,007,400 " -

134483400 LOC134483400 disks large homolog 5-like Unmapped NC_086037.1 19 " 17,030,335 " " 17,033,048 " +

134483401 LOC134483401 disks large homolog 5-like Unmapped NC_086037.1 19 " 17,070,304 " " 17,072,715 " +

134483408 LOC134483408 uncharacterized LOC134483408 Unmapped NC_086037.1 19 " 17,135,230 " " 17,139,150 " -

134483177 LOC134483177 disks large homolog 5-like Unmapped NC_086037.1 19 " 17,162,250 " " 17,166,906 " +

134483178 LOC134483178 uncharacterized LOC134483178 Unmapped NC_086037.1 19 " 17,175,134 " " 17,179,170 " -

134483179 LOC134483179 disks large homolog 5-like Unmapped NC_086037.1 19 " 17,197,870 " " 17,202,532 " +

134483188 LOC134483188 uncharacterized LOC134483188 Unmapped NC_086037.1 19 " 17,241,263 " " 17,582,592 " +

134483193 LOC134483193 centrosomal protein of 135 kDa-like Unmapped NC_086037.1 19 " 17,401,558 " " 17,408,582 " +

134483190 LOC134483190 disks large homolog 5-like Unmapped NC_086037.1 19 " 17,459,024 " " 17,483,516 " -

134483411 LOC134483411 disks large homolog 5-like Unmapped NC_086037.1 19 " 17,614,201 " " 17,619,442 " -

134483186 LOC134483186 uncharacterized LOC134483186 Unmapped NC_086037.1 19 " 17,677,641 " " 17,681,819 " +

134483192 LOC134483192 uncharacterized LOC134483192 Unmapped NC_086037.1 19 " 17,724,411 " " 17,729,250 " +

134483185 LOC134483185 uncharacterized LOC134483185 Unmapped NC_086037.1 19 " 17,755,418 " " 17,759,384 " +

134483538 LOC134483538 disks large homolog 5-like Unmapped NC_086037.1 19 " 17,776,681 " " 17,779,671 " -

134483414 LOC134483414 disks large homolog 5-like Unmapped NC_086037.1 19 " 17,979,052 " " 17,982,277 " -

134483415 LOC134483415 disks large homolog 5-like Unmapped NC_086037.1 19 " 17,991,098 " " 17,993,789 " -

134483182 LOC134483182 DNA-directed RNA polymerase II subunit GRINL1A-like Unmapped NC_086037.1 19 " 18,041,761 " " 18,043,544 " -

134483189 LOC134483189 disks large homolog 5-like Unmapped NC_086037.1 19 " 18,054,041 " " 18,059,018 " -

134483416 LOC134483416 disks large homolog 5-like Unmapped NC_086037.1 19 " 18,102,496 " " 18,103,771 " -

134483187 LOC134483187 uncharacterized LOC134483187 Unmapped NC_086037.1 19 " 18,138,086 " " 18,142,075 " +

134483195 LOC134483195 disks large homolog 5-like Unmapped NC_086037.1 19 " 18,192,918 " " 18,194,276 " -

134483417 LOC134483417 disks large homolog 5-like Unmapped NC_086037.1 19 " 18,234,889 " " 18,237,536 " -

134483184 LOC134483184 DNA-directed RNA polymerase II subunit GRINL1A-like Unmapped NC_086037.1 19 " 18,394,506 " " 18,395,597 " -

134483194 LOC134483194 disks large homolog 5-like Unmapped NC_086037.1 19 " 18,419,745 " " 18,422,628 " -

134483199 LOC134483199 uncharacterized LOC134483199 Unmapped NC_086037.1 19 " 18,481,454 " " 18,485,811 " +

134483419 LOC134483419 disks large homolog 5-like Unmapped NC_086037.1 19 " 18,505,453 " " 18,507,336 " -

134483420 LOC134483420 uncharacterized LOC134483420 Unmapped NC_086037.1 19 " 18,538,457 " " 18,542,457 " +

134483421 LOC134483421 disks large homolog 5-like Unmapped NC_086037.1 19 " 18,552,256 " " 18,554,206 " -

134483422 LOC134483422 disks large homolog 5-like Unmapped NC_086037.1 19 " 18,576,547 " " 18,580,551 " +

134483200 LOC134483200 disks large homolog 5-like Unmapped NC_086037.1 19 " 18,597,031 " " 18,618,595 " -

134483423 LOC134483423 disks large homolog 5-like Unmapped NC_086037.1 19 " 18,716,686 " " 18,721,483 " -

134483202 LOC134483202 uncharacterized LOC134483202 Unmapped NC_086037.1 19 " 18,871,386 " " 18,875,383 " +

134483203 LOC134483203 disks large homolog 5-like Unmapped NC_086037.1 19 " 18,941,750 " " 18,944,718 " -

134483539 LOC134483539 trafficking protein particle complex subunit 2-like protein Unmapped NC_086037.1 19 " 18,991,223 " " 18,991,778 " -

134483204 LOC134483204 IQ domain-containing protein M-like Novel NC_086037.1 19 " 18,996,851 " " 19,229,836 " +

134483206 LOC134483206 disks large homolog 5-like Unmapped NC_086037.1 19 " 19,268,034 " " 19,272,753 " +

134483207 LOC134483207 uncharacterized LOC134483207 Unmapped NC_086037.1 19 " 19,289,096 " " 19,304,191 " -

134483208 LOC134483208 uncharacterized LOC134483208 Unmapped NC_086037.1 19 " 19,424,762 " " 19,430,559 " -

134483209 LOC134483209 disks large homolog 5-like Unmapped NC_086037.1 19 " 19,455,851 " " 19,460,226 " -

134483424 LOC134483424 disks large homolog 5-like Unmapped NC_086037.1 19 " 19,525,237 " " 19,530,149 " +

134483675 LOC134483675 disks large homolog 5-like Unmapped NC_086037.1 19 " 19,574,788 " " 19,577,490 " +

134483210 LOC134483210 uncharacterized LOC134483210 Unmapped NC_086037.1 19 " 19,595,859 " " 19,610,556 " -

134483212 LOC134483212 uncharacterized LOC134483212 Unmapped NC_086037.1 19 " 19,725,666 " " 19,730,467 " -

134483214 LOC134483214 disks large homolog 5-like Unmapped NC_086037.1 19 " 19,744,846 " " 19,751,613 " +

134483213 LOC134483213 DNA-directed RNA polymerase II subunit GRINL1A-like Unmapped NC_086037.1 19 " 19,762,211 " " 19,763,755 " +

134483215 LOC134483215 uncharacterized LOC134483215 Unmapped NC_086037.1 19 " 19,774,430 " " 19,816,888 " -

134483219 LOC134483219 disks large homolog 5-like Unmapped NC_086037.1 19 " 19,840,066 " " 19,860,971 " +

134483217 LOC134483217 DNA-directed RNA polymerase II subunit GRINL1A-like Unmapped NC_086037.1 19 " 19,843,905 " " 19,846,296 " +

134483218 LOC134483218 disks large homolog 5-like Unmapped NC_086037.1 19 " 19,866,522 " " 19,870,832 " +

134483426 LOC134483426 disks large homolog 5-like Unmapped NC_086037.1 19 " 19,901,635 " " 19,903,735 " +

134483427 LOC134483427 uncharacterized LOC134483427 Unmapped NC_086037.1 19 " 19,913,271 " " 19,917,044 " -

134483429 LOC134483429 disks large homolog 5-like Unmapped NC_086037.1 19 " 20,008,869 " " 20,012,815 " +

134483430 LOC134483430 uncharacterized LOC134483430 Unmapped NC_086037.1 19 " 20,068,227 " " 20,071,913 " -

134483221 LOC134483221 disks large homolog 5-like Unmapped NC_086037.1 19 " 20,090,563 " " 20,095,051 " +

134483431 LOC134483431 disks large homolog 5-like Unmapped NC_086037.1 19 " 20,103,006 " " 20,106,124 " +

134483222 LOC134483222 disks large homolog 5-like Unmapped NC_086037.1 19 " 20,129,039 " " 20,132,937 " -

134478901 LOC134478901 uncharacterized LOC134478901 Unmapped NC_086037.1 19 " 20,176,903 " " 20,181,579 " -

134483226 LOC134483226 disks large homolog 5-like Unmapped NC_086037.1 19 " 20,248,429 " " 20,271,799 " -

134483433 LOC134483433 disks large homolog 5-like Unmapped NC_086037.1 19 " 20,283,986 " " 20,287,168 " +

134483225 LOC134483225 uncharacterized LOC134483225 Unmapped NC_086037.1 19 " 20,306,506 " " 20,310,388 " -

134483540 LOC134483540 disks large homolog 5-like Unmapped NC_086037.1 19 " 20,333,467 " " 20,338,700 " +

134483228 LOC134483228 disks large homolog 5-like Unmapped NC_086037.1 19 " 20,441,643 " " 20,444,440 " -

134483223 LOC134483223 uncharacterized LOC134483223 Unmapped NC_086037.1 19 " 20,524,415 " " 20,582,940 " -

134483227 LOC134483227 disks large homolog 5-like Unmapped NC_086037.1 19 " 20,557,989 " " 20,562,699 " +

134483434 LOC134483434 disks large homolog 5-like Unmapped NC_086037.1 19 " 20,608,218 " " 20,610,533 " +

134483224 LOC134483224 uncharacterized LOC134483224 Unmapped NC_086037.1 19 " 20,673,781 " " 20,677,966 " -

134483230 LOC134483230 DNA-directed RNA polymerase II subunit GRINL1A-like Unmapped NC_086037.1 19 " 20,768,512 " " 20,769,600 " -

134483233 LOC134483233 uncharacterized LOC134483233 Unmapped NC_086037.1 19 " 21,032,461 " " 21,036,459 " +

134483234 LOC134483234 disks large homolog 5-like Unmapped NC_086037.1 19 " 21,044,645 " " 21,049,388 " -

134483232 LOC134483232 disks large homolog 5-like Unmapped NC_086037.1 19 " 21,069,727 " " 21,073,634 " +

134483435 LOC134483435 disks large homolog 5-like Unmapped NC_086037.1 19 " 21,103,556 " " 21,106,477 " +

134483437 LOC134483437 disks large homolog 5-like Unmapped NC_086037.1 19 " 21,171,183 " " 21,175,892 " -

134483235 LOC134483235 disks large homolog 5-like Unmapped NC_086037.1 19 " 21,192,567 " " 21,196,558 " +

134483438 LOC134483438 trafficking protein particle complex subunit 2-like protein Unmapped NC_086037.1 19 " 21,221,472 " " 21,222,027 " -

134483440 LOC134483440 disks large homolog 5-like Unmapped NC_086037.1 19 " 21,480,114 " " 21,482,330 " +

134483237 LOC134483237 disks large homolog 5-like Unmapped NC_086037.1 19 " 21,489,230 " " 21,493,342 " +

134483238 LOC134483238 disks large homolog 5-like Unmapped NC_086037.1 19 " 21,564,058 " " 21,566,587 " -

134483239 LOC134483239 uncharacterized LOC134483239 Unmapped NC_086037.1 19 " 21,586,480 " " 21,590,454 " +

134483441 LOC134483441 disks large homolog 5-like Unmapped NC_086037.1 19 " 21,698,174 " " 21,700,821 " -

134483442 LOC134483442 uncharacterized LOC134483442 Unmapped NC_086037.1 19 " 21,718,428 " " 21,723,068 " +

134483677 LOC134483677 disks large homolog 5-like Unmapped NC_086037.1 19 " 21,728,727 " " 21,748,465 " -

134483240 LOC134483240 uncharacterized LOC134483240 Unmapped NC_086037.1 19 " 21,825,033 " " 21,833,498 " +

134483241 LOC134483241 uncharacterized LOC134483241 Unmapped NC_086037.1 19 " 21,865,327 " " 21,869,542 " +

134483544 LOC134483544 disks large homolog 5-like Unmapped NC_086037.1 19 " 22,236,071 " " 22,246,871 " -

134483245 LOC134483245 disks large homolog 5-like Unmapped NC_086037.1 19 " 22,311,516 " " 22,315,483 " +

134483247 LOC134483247 disks large homolog 5-like Unmapped NC_086037.1 19 " 22,331,087 " " 22,334,727 " -

134483246 LOC134483246 uncharacterized LOC134483246 Unmapped NC_086037.1 19 " 22,360,032 " " 22,364,088 " +

134483248 LOC134483248 disks large homolog 5-like Unmapped NC_086037.1 19 " 22,398,079 " " 22,401,551 " -

134483443 LOC134483443 disks large homolog 5-like Unmapped NC_086037.1 19 " 22,459,932 " " 22,464,017 " +

134483546 LOC134483546 disks large homolog 5-like Unmapped NC_086037.1 19 " 22,500,336 " " 22,504,365 " -

134483547 LOC134483547 disks large homolog 5-like Unmapped NC_086037.1 19 " 22,538,439 " " 22,543,330 " +

134483444 LOC134483444 disks large homolog 5-like Unmapped NC_086037.1 19 " 22,691,911 " " 22,696,644 " -

134483548 LOC134483548 uncharacterized LOC134483548 Unmapped NC_086037.1 19 " 22,710,922 " " 22,714,906 " +

134483445 LOC134483445 disks large homolog 5-like Unmapped NC_086037.1 19 " 22,730,616 " " 22,734,434 " -

134483446 LOC134483446 disks large homolog 5-like Unmapped NC_086037.1 19 " 22,753,941 " " 22,757,919 " +

134478916 LOC134478916 disks large homolog 5-like Unmapped NC_086037.1 19 " 22,824,465 " " 22,829,371 " +

134483549 LOC134483549 IQ domain-containing protein M-like Unmapped NC_086037.1 19 " 22,834,440 " " 22,909,854 " -

134483254 LOC134483254 DNA-directed RNA polymerase II subunit GRINL1A-like Unmapped NC_086037.1 19 " 23,001,699 " " 23,002,793 " -

134483447 LOC134483447 disks large homolog 5-like Unmapped NC_086037.1 19 " 23,014,558 " " 23,017,522 " -

134483448 LOC134483448 disks large homolog 5-like Unmapped NC_086037.1 19 " 23,358,528 " " 23,363,204 " +

134478890 LOC134478890 uncharacterized LOC134478890 Unmapped NC_086037.1 19 " 23,408,464 " " 23,421,934 " +

134483266 LOC134483266 disks large homolog 5-like Unmapped NC_086037.1 19 " 23,455,322 " " 23,480,675 " -

134483267 LOC134483267 disks large homolog 5-like Unmapped NC_086037.1 19 " 23,542,325 " " 23,546,861 " +

134483260 LOC134483260 disks large homolog 5-like Unmapped NC_086037.1 19 " 23,555,246 " " 24,219,730 " -

134483269 LOC134483269 disks large homolog 5-like Unmapped NC_086037.1 19 " 23,595,680 " " 23,599,470 " +

134483262 LOC134483262 uncharacterized LOC134483262 Unmapped NC_086037.1 19 " 23,634,972 " " 23,640,033 " -

134483264 LOC134483264 disks large homolog 5-like Unmapped NC_086037.1 19 " 23,686,251 " " 23,690,220 " +

134483451 LOC134483451 disks large homolog 5-like Unmapped NC_086037.1 19 " 23,706,905 " " 23,711,611 " -

134483256 LOC134483256 DNA-directed RNA polymerase II subunit GRINL1A-like Unmapped NC_086037.1 19 " 23,727,067 " " 23,728,792 " -

134483259 LOC134483259 uncharacterized LOC134483259 Unmapped NC_086037.1 19 " 23,756,508 " " 24,235,281 " +

134483265 LOC134483265 uncharacterized LOC134483265 Unmapped NC_086037.1 19 " 23,813,360 " " 23,817,440 " +

134483257 LOC134483257 DNA-directed RNA polymerase II subunit GRINL1A-like Unmapped NC_086037.1 19 " 23,823,082 " " 23,824,379 " -

134483268 LOC134483268 disks large homolog 5-like Unmapped NC_086037.1 19 " 23,970,637 " " 23,975,387 " -

134483519 LOC134483519 disks large homolog 5-like Unmapped NC_086037.1 19 " 24,013,088 " " 24,017,886 " -

134483263 LOC134483263 uncharacterized LOC134483263 Unmapped NC_086037.1 19 " 24,060,605 " " 24,115,748 " +

134483258 LOC134483258 DNA-directed RNA polymerase II subunit GRINL1A-like Unmapped NC_086037.1 19 " 24,069,916 " " 24,070,767 " -

134483452 LOC134483452 disks large homolog 5-like Unmapped NC_086037.1 19 " 24,081,668 " " 24,084,637 " -

134483551 LOC134483551 disks large homolog 5-like Unmapped NC_086037.1 19 " 24,150,376 " " 24,156,222 " +

134483454 LOC134483454 disks large homolog 5-like Unmapped NC_086037.1 19 " 24,172,973 " " 24,173,740 " +

134483261 LOC134483261 centrosomal protein of 135 kDa-like Unmapped NC_086037.1 19 " 24,240,480 " " 24,245,076 " +

134483270 LOC134483270 centrosomal protein of 135 kDa-like Unmapped NC_086037.1 19 " 24,258,570 " " 24,263,454 " +

134483455 LOC134483455 disks large homolog 5-like Unmapped NC_086037.1 19 " 24,400,441 " " 24,404,977 " -

134483273 LOC134483273 disks large homolog 5-like Unmapped NC_086037.1 19 " 24,431,125 " " 24,435,909 " +

134483276 LOC134483276 uncharacterized LOC134483276 Unmapped NC_086037.1 19 " 24,483,479 " " 24,488,331 " -

134483456 LOC134483456 disks large homolog 5-like Unmapped NC_086037.1 19 " 24,502,143 " " 24,504,683 " +

134483458 LOC134483458 disks large homolog 5-like Unmapped NC_086037.1 19 " 24,717,874 " " 24,722,462 " -

134483459 LOC134483459 uncharacterized LOC134483459 Unmapped NC_086037.1 19 " 24,833,206 " " 24,837,641 " -

134483277 LOC134483277 uncharacterized LOC134483277 Unmapped NC_086037.1 19 " 24,851,198 " " 25,063,158 " -

134483278 LOC134483278 disks large homolog 5-like Unmapped NC_086037.1 19 " 24,956,890 " " 24,963,626 " +

134483463 LOC134483463 disks large homolog 5-like Unmapped NC_086037.1 19 " 24,998,828 " " 25,001,218 " -

134483281 LOC134483281 disks large homolog 5-like Unmapped NC_086037.1 19 " 25,073,647 " " 25,078,334 " -

134483464 LOC134483464 disks large homolog 5-like Unmapped NC_086037.1 19 " 25,099,903 " " 25,102,014 " +

134483282 LOC134483282 disks large homolog 5-like Unmapped NC_086037.1 19 " 25,183,546 " " 25,188,113 " +

134483284 LOC134483284 uncharacterized LOC134483284 Unmapped NC_086037.1 19 " 25,240,586 " " 25,245,282 " -

134483287 LOC134483287 disks large homolog 5-like Unmapped NC_086037.1 19 " 25,414,211 " " 25,416,373 " +

134483288 LOC134483288 disks large homolog 5-like Unmapped NC_086037.1 19 " 25,432,727 " " 25,436,706 " -

134483289 LOC134483289 disks large homolog 5-like Unmapped NC_086037.1 19 " 25,459,687 " " 25,463,648 " +

134483290 LOC134483290 uncharacterized LOC134483290 Unmapped NC_086037.1 19 " 25,473,677 " " 25,476,594 " -

134483552 LOC134483552 uncharacterized LOC134483552 Unmapped NC_086037.1 19 " 25,601,052 " " 25,605,993 " -

134483467 LOC134483467 disks large homolog 5-like Unmapped NC_086037.1 19 " 25,710,929 " " 25,712,478 " +

134483468 LOC134483468 disks large homolog 5-like Unmapped NC_086037.1 19 " 25,744,565 " " 25,749,353 " +

134483553 LOC134483553 disks large homolog 5-like Unmapped NC_086037.1 19 " 25,756,089 " " 25,760,362 " +

134483469 LOC134483469 disks large homolog 5-like Unmapped NC_086037.1 19 " 25,804,994 " " 25,806,060 " +

134483470 LOC134483470 uncharacterized LOC134483470 Unmapped NC_086037.1 19 " 25,815,398 " " 25,819,359 " -

134483554 LOC134483554 uncharacterized LOC134483554 Unmapped NC_086037.1 19 " 25,874,103 " " 25,879,719 " -

134483294 LOC134483294 disks large homolog 5-like Unmapped NC_086037.1 19 " 25,921,722 " " 25,926,785 " +

134483472 LOC134483472 disks large homolog 5-like Unmapped NC_086037.1 19 " 26,068,251 " " 26,070,373 " +

134483473 LOC134483473 disks large homolog 5-like Unmapped NC_086037.1 19 " 26,112,474 " " 26,116,451 " +

134483555 LOC134483555 disks large homolog 5-like Unmapped NC_086037.1 19 " 26,186,227 " " 26,191,082 " -

134483474 LOC134483474 uncharacterized LOC134483474 Unmapped NC_086037.1 19 " 26,241,720 " " 26,246,442 " -

134483566 LOC134483566 uncharacterized LOC134483566 Unmapped NC_086037.1 19 " 26,331,951 " " 26,334,867 " -

134483477 LOC134483477 disks large homolog 5-like Unmapped NC_086037.1 19 " 26,545,188 " " 26,549,988 " -

134483569 LOC134483569 disks large homolog 5-like Unmapped NC_086037.1 19 " 26,611,726 " " 26,694,516 " -

134483568 LOC134483568 disks large homolog 5-like Unmapped NC_086037.1 19 " 26,725,035 " " 26,727,523 " -

134483479 LOC134483479 disks large homolog 5-like Unmapped NC_086037.1 19 " 26,994,953 " " 26,999,690 " -

134483571 LOC134483571 disks large homolog 5-like Unmapped NC_086037.1 19 " 27,056,919 " " 27,103,638 " +

134483570 LOC134483570 disks large homolog 5-like Unmapped NC_086037.1 19 " 27,235,349 " " 27,242,002 " -

134483567 LOC134483567 uncharacterized LOC134483567 Unmapped NC_086037.1 19 " 27,328,903 " " 27,333,673 " +

134483481 LOC134483481 DNA-directed RNA polymerase II subunit GRINL1A-like Unmapped NC_086037.1 19 " 27,382,815 " " 27,384,038 " -

134483482 LOC134483482 disks large homolog 5-like Unmapped NC_086037.1 19 " 27,566,937 " " 27,569,336 " -

134483575 LOC134483575 uncharacterized LOC134483575 Unmapped NC_086037.1 19 " 27,592,817 " " 27,596,842 " +

134483560 LOC134483560 disks large homolog 5-like Unmapped NC_086037.1 19 " 27,762,900 " " 27,768,128 " -

134483581 LOC134483581 disks large homolog 5-like Unmapped NC_086037.1 19 " 27,868,340 " " 27,875,429 " +

134483577 LOC134483577 DNA-directed RNA polymerase II subunit GRINL1A-like Unmapped NC_086037.1 19 " 27,881,120 " " 27,882,214 " -

134483582 LOC134483582 disks large homolog 5-like Unmapped NC_086037.1 19 " 27,906,461 " " 27,946,560 " -

134483578 LOC134483578 uncharacterized LOC134483578 Unmapped NC_086037.1 19 " 27,974,035 " " 27,978,124 " +

134483579 LOC134483579 disks large homolog 5-like Unmapped NC_086037.1 19 " 28,017,011 " " 28,020,993 " +

134483580 LOC134483580 disks large homolog 5-like Unmapped NC_086037.1 19 " 28,031,545 " " 28,036,226 " +

134483488 LOC134483488 disks large homolog 5-like Unmapped NC_086037.1 19 " 28,072,930 " " 28,077,651 " -

134483588 LOC134483588 uncharacterized LOC134483588 Unmapped NC_086037.1 19 " 28,248,771 " " 28,253,432 " +

134483489 LOC134483489 DNA-directed RNA polymerase II subunit GRINL1A-like Unmapped NC_086037.1 19 " 28,304,106 " " 28,305,908 " -

134483490 LOC134483490 DNA-directed RNA polymerase II subunit GRINL1A-like Unmapped NC_086037.1 19 " 28,321,614 " " 28,325,958 " -

134483491 LOC134483491 disks large homolog 5-like Unmapped NC_086037.1 19 " 28,336,660 " " 28,339,609 " -

134483587 LOC134483587 disks large homolog 5-like Unmapped NC_086037.1 19 " 28,360,249 " " 28,365,013 " +

134483586 LOC134483586 DNA-directed RNA polymerase II subunit GRINL1A-like Unmapped NC_086037.1 19 " 28,418,127 " " 28,420,174 " -

134483589 LOC134483589 disks large homolog 5-like Unmapped NC_086037.1 19 " 28,430,932 " " 28,435,814 " -

134483492 LOC134483492 uncharacterized LOC134483492 Unmapped NC_086037.1 19 " 28,589,185 " " 28,593,074 " +

134483596 LOC134483596 disks large homolog 5-like Unmapped NC_086037.1 19 " 28,790,220 " " 28,811,767 " -

134483494 LOC134483494 uncharacterized LOC134483494 Unmapped NC_086037.1 19 " 29,023,812 " " 29,027,798 " +

134483598 LOC134483598 DNA-directed RNA polymerase II subunit GRINL1A-like Unmapped NC_086037.1 19 " 29,045,131 " " 29,046,411 " -

134483599 LOC134483599 disks large homolog 5-like Unmapped NC_086037.1 19 " 29,057,018 " " 29,063,436 " -

134483563 LOC134483563 disks large homolog 5-like Unmapped NC_086037.1 19 " 29,141,008 " " 29,146,510 " +

134483601 LOC134483601 DNA-directed RNA polymerase II subunit GRINL1A-like Unmapped NC_086037.1 19 " 29,150,586 " " 29,151,953 " -

134483496 LOC134483496 disks large homolog 5-like Unmapped NC_086037.1 19 " 29,210,204 " " 29,214,912 " -

134483604 LOC134483604 disks large homolog 5-like Unmapped NC_086037.1 19 " 29,372,919 " " 29,386,780 " +

134483606 LOC134483606 uncharacterized LOC134483606 Unmapped NC_086037.1 19 " 29,617,749 " " 29,622,579 " +

134483608 LOC134483608 disks large homolog 5-like Unmapped NC_086037.1 19 " 29,771,953 " " 29,775,917 " +

134483501 LOC134483501 disks large homolog 5-like Unmapped NC_086037.1 19 " 29,793,495 " " 29,798,101 " -

134483609 LOC134483609 disks large homolog 5-like Unmapped NC_086037.1 19 " 29,853,695 " " 29,882,872 " -

134483502 LOC134483502 disks large homolog 5-like Unmapped NC_086037.1 19 " 29,921,713 " " 29,924,555 " -

134483611 LOC134483611 uncharacterized LOC134483611 Unmapped NC_086037.1 19 " 29,937,013 " " 29,940,659 " +

134483616 Chd9nb CHD9 neighbor Novel NC_086037.1 19 " 32,348,739 " " 32,350,224 " +

134483308 LOC134483308 disks large homolog 5-like Unmapped NC_086037.1 19 " 38,111,533 " " 38,116,232 " +

134483310 LOC134483310 disks large homolog 5-like Unmapped NC_086037.1 19 " 38,138,876 " " 38,143,631 " -

134483623 LOC134483623 disks large homolog 5-like Unmapped NC_086037.1 19 " 38,177,260 " " 38,182,037 " -

134483504 LOC134483504 disks large homolog 5-like Unmapped NC_086037.1 19 " 38,213,517 " " 38,218,565 " -

134483309 LOC134483309 uncharacterized LOC134483309 Novel NC_086037.1 19 " 38,253,352 " " 38,258,704 " +

134478840 LOC134478840 disks large homolog 5-like Unmapped NC_086037.1 19 " 38,322,097 " " 38,326,992 " -

134483625 LOC134483625 disks large homolog 5-like Unmapped NC_086037.1 19 " 38,356,980 " " 38,374,952 " -

134483626 LOC134483626 carboxylesterase 1C-like Novel NC_086037.1 19 " 38,408,662 " " 38,425,531 " -

134483627 LOC134483627 KH homology domain-containing protein 1-like Novel NC_086037.1 19 " 38,531,421 " " 38,533,201 " -

134483313 LOC134483313 disks large homolog 5-like Unmapped NC_086037.1 19 " 39,511,212 " " 39,516,703 " +

134478811 LOC134478811 disks large homolog 5-like Unmapped NC_086037.1 19 " 39,531,388 " " 39,803,550 " -

134483670 LOC134483670 disks large homolog 5-like Unmapped NC_086037.1 19 " 39,550,902 " " 39,556,465 " +

134483322 LOC134483322 disks large homolog 5-like Unmapped NC_086037.1 19 " 39,711,773 " " 39,714,512 " +

134483318 LOC134483318 igE-binding protein-like Unmapped NC_086037.1 19 " 39,749,777 " " 39,793,484 " +

134483321 LOC134483321 disks large homolog 5-like Unmapped NC_086037.1 19 " 39,812,958 " " 39,819,192 " +

134483329 Smim46 small integral membrane protein 46 Novel NC_086037.1 19 " 41,075,517 " " 41,079,152 " -

134483684 LOC134483684 glyceraldehyde-3-phosphate dehydrogenase-like Novel NC_086037.1 19 " 42,393,676 " " 42,394,227 " -

134483672 LOC134483672 "essential MCU regulator, mitochondrial-like" Novel NC_086037.1 19 " 55,983,396 " " 55,989,927 " +

134483662 LOC134483662 LIM domain-containing protein A-like Novel NC_086037.1 19 " 71,124,324 " " 71,128,918 " -

134483666 LOC134483666 uncharacterized LOC134483666 Novel NC_086037.1 19 " 73,566,654 " " 73,569,105 " -

134483842 LOC134483842 uncharacterized LOC134483842 Novel NC_086038.1 20 " 2,074,483 " " 2,082,767 " -

134483845 LOC134483845 uncharacterized LOC134483845 Novel NC_086038.1 20 " 2,770,857 " " 2,777,725 " +

134483863 LOC134483863 uncharacterized LOC134483863 Novel NC_086038.1 20 " 7,398,406 " " 7,404,386 " +

134483872 LOC134483872 keratin-associated protein 5-1-like Novel NC_086038.1 20 " 8,592,826 " " 8,598,598 " -

134483783 LOC134483783 keratin-associated protein 12-1-like Novel NC_086038.1 20 " 10,895,790 " " 10,896,134 " +

134483923 LOC134483923 glyceraldehyde-3-phosphate dehydrogenase-like Novel NC_086038.1 20 " 31,457,661 " " 31,928,028 " -

134483945 LOC134483945 LIM/homeobox protein Lhx5-like Novel NC_086038.1 20 " 37,972,324 " " 37,976,724 " -

134483938 LOC134483938 double homeobox protein A-like Unmapped NC_086038.1 20 " 38,269,469 " " 38,270,290 " -

134483839 LOC134483839 double homeobox protein A-like Unmapped NC_086038.1 20 " 38,276,316 " " 38,277,137 " -

134483948 LOC134483948 double homeobox protein 4C-like Novel NC_086038.1 20 " 39,187,994 " " 39,188,434 " -

134483947 LOC134483947 double homeobox protein 4-like protein 4 Unmapped NC_086038.1 20 " 39,385,793 " " 39,462,146 " -

134483819 LOC134483819 GATOR2 complex protein MIOS-like Novel NC_086038.1 20 " 42,356,447 " " 42,437,066 " +

134483817 LOC134483817 large ribosomal subunit protein eL8-like Novel NC_086038.1 20 " 42,368,942 " " 42,370,186 " -

134484002 LOC134484002 rho GTPase-activating protein 20-like Unmapped NC_086039.1 X " 2,589,275 " " 2,597,558 " -

134484162 LOC134484162 gamma-aminobutyric acid receptor-associated protein-like 2 Unmapped NC_086039.1 X " 3,436,846 " " 3,437,731 " -

134484054 LOC134484054 large ribosomal subunit protein eL21 Novel NC_086039.1 X " 12,180,570 " " 12,183,860 " +

134484055 LOC134484055 small ribosomal subunit protein eS27-like Novel NC_086039.1 X " 12,539,112 " " 12,542,828 " -

134484128 LOC134484128 diphosphoinositol polyphosphate phosphohydrolase 3-alpha Novel NC_086039.1 X " 19,151,273 " " 19,155,977 " -

134484045 LOC134484045 large ribosomal subunit protein eL21-like Novel NC_086039.1 X " 23,297,709 " " 23,642,728 " -

134484093 LOC134484093 KANTR integral membrane protein Novel NC_086039.1 X " 24,881,376 " " 24,881,606 " -

134484121 LOC134484121 "phosphatidylinositol 4,5-bisphosphate 3-kinase catalytic subunit alpha isoform-like" Novel NC_086039.1 X " 25,064,123 " " 25,121,918 " -

134484165 LOC134484165 FANCD2 opposite strand protein-like Unmapped NC_086039.1 X " 30,502,777 " " 30,504,080 " -

134484151 LOC134484151 lipocalin Cav p 2.0101-like Novel NC_086039.1 X " 45,880,367 " " 45,889,173 " +

134484068 LOC134484068 testis-specific gene A8 protein-like Novel NC_086039.1 X " 51,710,851 " " 51,712,028 " -

134484102 LOC134484102 uncharacterized LOC134484102 Novel NC_086039.1 X " 57,573,252 " " 57,575,097 " -

134484061 LOC134484061 uncharacterized LOC134484061 Novel NC_086039.1 X " 67,929,912 " " 67,932,755 " +

134484067 Pabpc1l2b poly(A) binding protein cytoplasmic 1 like 2B Novel NC_086039.1 X " 72,133,639 " " 72,136,612 " -

134484083 LOC134484083 polycomb group RING finger protein 6-like Novel NC_086039.1 X " 72,614,149 " " 72,614,583 " -

134484088 LOC134484088 large ribosomal subunit protein eL29-like Unmapped NC_086039.1 X " 79,701,793 " " 79,702,601 " -

302776 RGD1561230 similar to RIKEN cDNA 4921511C20 gene Novel NC_086039.1 X " 94,181,470 " " 94,200,995 " +

134484183 LOC134484183 uncharacterized LOC134484183 Novel NC_086039.1 X " 101,280,155 " " 101,284,729 " +

134484073 LOC134484073 uncharacterized LOC134484073 Novel NC_086039.1 X " 116,503,855 " " 116,512,279 " -

134484021 LOC134484021 testis-expressed protein 13D-like Novel NC_086039.1 X " 126,224,303 " " 126,227,466 " +

134484169 LOC134484169 high mobility group protein B4-like Novel NC_086039.1 X " 136,540,751 " " 136,541,467 " -

134484098 LOC134484098 zinc finger and SCAN domain-containing protein 5C-like Novel NC_086039.1 X " 139,067,381 " " 139,071,687 " -

134484220 LOC134484220 zinc finger protein 431-like Unmapped NC_086039.1 X " 143,247,906 " " 143,248,118 " -

134484224 LOC134484224 disks large homolog 5-like Novel NC_086039.1 X " 152,741,466 " " 152,764,042 " +

134484105 LOC134484105 "heat shock transcription factor, X-linked member 3-like" Novel NC_086039.1 X " 154,112,750 " " 154,117,995 " -

134484030 LOC134484030 X-linked lymphocyte-regulated protein 5C-like Unmapped NC_086039.1 X " 156,013,006 " " 156,030,325 " -

134484029 LOC134484029 PWWP domain-containing DNA repair factor 4-like Unmapped NC_086039.1 X " 156,030,380 " " 156,036,492 " +

134484031 LOC134484031 PWWP domain-containing DNA repair factor 4-like Unmapped NC_086039.1 X " 156,051,463 " " 156,057,584 " -

134484032 LOC134484032 X-linked lymphocyte-regulated protein 5C-like Unmapped NC_086039.1 X " 156,057,613 " " 156,074,943 " +

134484027 LOC134484027 40-kDa huntingtin-associated protein Unmapped NC_086039.1 X " 156,108,567 " " 156,110,271 " -

134484226 LOC134484226 uncharacterized LOC134484226 Novel NC_086039.1 X " 156,620,140 " " 156,624,138 " +

134484035 LOC134484035 EKC/KEOPS complex subunit LAGE3-like Unmapped NC_086039.1 X " 157,661,826 " " 157,664,017 " -

134484036 LOC134484036 olfactory receptor 10K1-like Unmapped NC_086039.1 X " 157,719,256 " " 157,720,194 " +

134484451 LOC134484451 sex-determining region Y protein-like Novel NC_086040.1 Y " 38,343 " " 39,532 " -

134484604 LOC134484604 uncharacterized LOC134484604 Unmapped NW_026947375.1 Y " 331,962 " " 387,233 " -

134484566 LOC134484566 uncharacterized LOC134484566 Unmapped NW_026947368.1 Y " 817,220 " " 947,935 " +

134484496 LOC134484496 uncharacterized LOC134484496 Novel NC_086040.1 Y " 4,545,463 " " 4,559,318 " +

134484312 LOC134484312 Y-linked testis-specific protein 1-like Unmapped NC_086040.1 Y " 8,799,096 " " 8,802,804 " +

134484298 LOC134484298 Y-linked testis-specific protein 1-like Novel NC_086040.1 Y " 8,925,418 " " 8,927,708 " +

134484330 LOC134484330 glutaredoxin-1-like Novel NC_086040.1 Y " 11,667,144 " " 11,667,451 " +

134484265 LOC134484265 glutaredoxin-1-like Unmapped NC_086040.1 Y " 12,650,938 " " 12,651,285 " +

134484302 LOC134484302 uncharacterized LOC134484302 Unmapped NC_086040.1 Y " 27,997,215 " " 28,004,676 " -

134484391 LOC134484391 Y-linked testis-specific protein 1-like Unmapped NC_086040.1 Y " 32,254,592 " " 32,255,607 " -

134484328 LOC134484328 Y-linked testis-specific protein 1-like Unmapped NC_086040.1 Y " 32,389,124 " " 32,390,179 " -

134484423 LOC134484423 Y-linked testis-specific protein 1-like Unmapped NC_086040.1 Y " 33,034,855 " " 33,035,883 " -

134484325 LOC134484325 Y-linked testis-specific protein 1-like Unmapped NC_086040.1 Y " 33,626,674 " " 33,628,888 " -

134484425 LOC134484425 Y-linked testis-specific protein 1-like Unmapped NC_086040.1 Y " 34,254,020 " " 34,256,281 " -

134484427 LOC134484427 Y-linked testis-specific protein 1-like Unmapped NC_086040.1 Y " 34,900,051 " " 34,902,290 " +

134484326 LOC134484326 Y-linked testis-specific protein 1-like Unmapped NC_086040.1 Y " 38,139,183 " " 38,141,404 " -

134484285 LOC134484285 Y-linked testis-specific protein 1-like Unmapped NC_086040.1 Y " 38,257,488 " " 38,259,732 " -

134484513 LOC134484513 uncharacterized LOC134484513 Unmapped NC_086040.1 Y " 40,298,696 " " 40,304,338 " +

134484358 LOC134484358 Y-linked testis-specific protein 1-like Unmapped NC_086040.1 Y " 40,635,598 " " 40,637,819 " +

134484306 LOC134484306 Y-linked testis-specific protein 1-like Unmapped NC_086040.1 Y " 41,420,207 " " 41,422,439 " -

134484303 LOC134484303 Y-linked testis-specific protein 1-like Unmapped NC_086040.1 Y " 41,544,708 " " 41,546,968 " -

134484366 LOC134484366 Y-linked testis-specific protein 1-like Unmapped NC_086040.1 Y " 42,155,841 " " 42,158,097 " -

134484299 LOC134484299 Y-linked testis-specific protein 1-like Unmapped NC_086040.1 Y " 42,280,643 " " 42,282,893 " -

134484392 LOC134484392 Y-linked testis-specific protein 1-like Unmapped NC_086040.1 Y " 42,379,529 " " 42,381,783 " -

134484258 LOC134484258 Y-linked testis-specific protein 1-like Novel NC_086040.1 Y " 44,673,403 " " 44,675,696 " -

134484250 LOC134484250 Y-linked testis-specific protein 1-like Unmapped NC_086040.1 Y " 44,758,337 " " 44,760,607 " -

134484341 LOC134484341 Y-linked testis-specific protein 1-like Unmapped NC_086040.1 Y " 44,843,971 " " 44,846,200 " -

134484316 LOC134484316 Y-linked testis-specific protein 1-like Unmapped NC_086040.1 Y " 44,929,540 " " 44,931,785 " -

134484297 LOC134484297 Y-linked testis-specific protein 1-like Unmapped NC_086040.1 Y " 45,015,136 " " 45,017,396 " -

134484260 LOC134484260 Y-linked testis-specific protein 1-like Unmapped NC_086040.1 Y " 45,100,812 " " 45,103,070 " -

134484319 LOC134484319 Y-linked testis-specific protein 1-like Unmapped NC_086040.1 Y " 45,186,452 " " 45,188,696 " -

134484449 LOC134484449 Y-linked testis-specific protein 1-like Unmapped NC_086040.1 Y " 45,272,133 " " 45,274,395 " -

134484396 LOC134484396 Y-linked testis-specific protein 1-like Unmapped NC_086040.1 Y " 45,359,391 " " 45,361,707 " -

134484361 LOC134484361 Y-linked testis-specific protein 1-like Unmapped NC_086040.1 Y " 45,980,366 " " 45,982,589 " -

134484490 LOC134484490 Y-linked testis-specific protein 1-like Unmapped NC_086040.1 Y " 47,768,858 " " 47,771,021 " +

134484287 LOC134484287 Y-linked testis-specific protein 1-like Unmapped NC_086040.1 Y " 47,890,325 " " 47,900,637 " +

134484462 LOC134484462 Y-linked testis-specific protein 1-like Unmapped NC_086040.1 Y " 52,343,012 " " 52,345,379 " +

134484443 LOC134484443 Y-linked testis-specific protein 1-like Unmapped NC_086040.1 Y " 52,975,325 " " 52,977,578 " +

134484320 LOC134484320 Y-linked testis-specific protein 1-like Unmapped NC_086040.1 Y " 53,508,780 " " 53,510,989 " +

134484471 LOC134484471 Y-linked testis-specific protein 1-like Unmapped NC_086040.1 Y " 53,574,363 " " 53,575,558 " +

134484371 LOC134484371 Y-linked testis-specific protein 1-like Unmapped NC_086040.1 Y " 54,304,198 " " 54,306,433 " +

134484376 LOC134484376 Y-linked testis-specific protein 1-like Unmapped NC_086040.1 Y " 54,532,403 " " 54,534,651 " +

134484268 LOC134484268 Y-linked testis-specific protein 1-like Unmapped NC_086040.1 Y " 54,669,584 " " 54,671,838 " -

134484495 LOC134484495 Y-linked testis-specific protein 1-like Unmapped NC_086040.1 Y " 55,168,590 " " 55,170,816 " +

134484257 LOC134484257 Y-linked testis-specific protein 1-like Unmapped NC_086040.1 Y " 55,979,002 " " 55,981,235 " -

134484813 LOC134484813 GTP-binding protein 4-like Unmapped NW_026947414.1 " 29,572 " " 37,244 " +

134484812 LOC134484812 isopentenyl-diphosphate delta-isomerase 2-like Unmapped NW_026947414.1 " 40,028 " " 44,242 " -

134484814 LOC134484814 GTP-binding protein 4-like Unmapped NW_026947414.1 " 61,445 " " 68,464 " -

134484815 LOC134484815 isopentenyl-diphosphate delta-isomerase 2-like Unmapped NW_026947414.1 " 93,413 " " 95,474 " +
