# Supplementary material for: Construction and evaluation of a new rat reference genome assembly, GRCr8, from long reads and long-range scaffolding
Source: HighWire-hosted journal article supplement (doi:10.1101/gr.279292.124), 2024-11-01
Supplement: Supplemental_Table_S2.docx [file Supplemental_Table_S2.docx]

**Supplemental Table 2 .**

**Annotations not transferred by LiftOff from mRatBN7.2 to GRCr8**

Ensembl Annotations

gene:ENSRNOG00000063041

gene:ENSRNOG00000066809

gene:ENSRNOG00000062792

gene:ENSRNOG00000062804

UCSC Annotations

Olr483

Olr484

Olr745

Rn45s.1

Rn45s

Rn18s

Rn45s.2

NCBI Annotations (note, tRNA models are predictions using tRNAscan-SE)

gene-ras GTPase-activating protein nGAP-like

gene-putative PRAME family member 24-like

gene-U7 small nuclear RNA

gene-T cell receptor alpha variable 5-like

gene-Or8u8

gene-Olfactory receptor 8J3-like

gene-Or4x13

gene-Clip4

gene-LOC120099236-lncRNA

gene-Spetex2el8

gene-Trnat-agu-36

gene-Trnav-aac-45

gene-Trnaa-agc

gene-Trnaa-agc-10

gene-Trnaa-agc-2

gene-Trnaa-agc-3

gene-Trnaa-agc-4

gene-Trnaa-agc-5

gene-Trnaa-agc-6

gene-Trnaa-agc-7

gene-Trnaa-agc-8

gene-Trnaa-agc-9

gene-Trnag-acc

gene-Trnag-acc-2

gene-Trnag-acc-3

gene-Trnag-acc-4

gene-Trnah-aug

gene-Trnap-agg

gene-Trnap-agg-10

gene-Trnap-agg-11

gene-Trnap-agg-12

gene-Trnap-agg-13

gene-Trnap-agg-2

gene-Trnap-agg-3

gene-Trnap-agg-4

gene-Trnap-agg-5

gene-Trnap-agg-6

gene-Trnap-agg-7

gene-Trnap-agg-9

gene-Trnap-cgg

gene-Trnap-cgg-2

gene-Trnap-ggg

gene-Trnap-ggg-2

gene-Trnap-ggg-3

gene-Trnas-aga

gene-Trnas-aga-2

gene-Trnas-aga-3

gene-Trnas-aga-4

gene-Trnav-aac

gene-Trnav-aac-2

gene-Trnav-aac-3

gene-Trnav-cac

gene-Trnaa-agc-47

gene-Trnaa-agc-48

gene-Trnaa-agc-49

gene-Trnaa-agc-50

gene-Trnaa-agc-51

gene-Trnaa-cgc-2

gene-Trnaa-ugc-2

gene-Trnaa-ugc-3

gene-Trnag-acc-7

gene-Trnap-agg-55

gene-Trnap-agg-56

gene-Trnap-agg-57

gene-Trnap-ggg-9

gene-Trnas-aga-22

gene-Trnas-aga-23

gene-Trnas-aga-26

gene-Trnas-aga-27

gene-Trnat-agu-16

gene-Trnat-agu-17

gene-Trnat-agu-18

gene-Trnav-aac-32

gene-Trnav-aac-33

gene-Trnaa-agc-52

gene-Trnaa-agc-53

gene-Trnaa-agc-54

gene-Trnap-agg-58

gene-Trnat-agu-19

gene-Trnav-aac-34

gene-Trnaa-agc-55

gene-Trnaa-agc-57

gene-Trnag-acc-8

gene-Trnap-agg-59

gene-Trnap-agg-60

gene-Trnap-agg-61

gene-Trnap-agg-62

gene-Trnas-aga-28

gene-Trnas-aga-29

gene-Trnat-agu-20

gene-Trnaa-agc-58

gene-Trnah-aug-2

gene-Trnap-agg-63

gene-Trnap-agg-64

gene-Trnap-ugg-6

gene-Trnas-aga-30

gene-Trnah-aug-3

gene-Trnap-agg-66

gene-Trnap-agg-67

gene-Trnap-agg-68

gene-Trnap-ggg-11

gene-Trnas-aga-31

gene-Trnat-agu-21

gene-Trnav-aac-35

gene-Trnav-aac-36

gene-Trnaa-agc-59

gene-Trnaa-agc-60

gene-Trnaa-agc-61

gene-Trnaa-agc-62

gene-Trnap-agg-69

gene-Trnap-agg-71

gene-Trnap-agg-72

gene-Trnap-agg-73

gene-Trnap-agg-74

gene-Trnap-ugg-8

gene-Trnas-aga-32

gene-Trnas-aga-33

gene-Trnat-agu-23

gene-Trnav-aac-37

gene-Trnaa-agc-63

gene-Trnaa-agc-64

gene-Trnaa-agc-65

gene-Trnaa-agc-66

gene-Trnaa-agc-67

gene-Trnaa-agc-68

gene-Trnal-aag-19

gene-Trnap-agg-75

gene-Trnap-agg-76

gene-Trnas-aga-34

gene-Trnat-agu-24

gene-Trnat-agu-25

gene-Trnav-aac-38

gene-Trnav-aac-39

gene-Trnav-cac-5

gene-Trnaa-agc-74

gene-Trnaa-cgc-5

gene-Trnaa-ugc-6

gene-Trnap-agg-77

gene-Trnap-agg-78

gene-Trnas-aga-35

gene-Trnas-aga-36

gene-Trnas-aga-37

gene-Trnas-aga-43

gene-Trnaa-agc-75

gene-Trnaa-ggc-6

gene-Trnap-agg-80

gene-Trnap-agg-81

gene-Trnap-agg-82

gene-Trnas-aga-44

gene-Trnat-agu-30

gene-Trnaa-agc-76

gene-Trnaa-agc-77

gene-Trnaa-agc-78

gene-Trnaa-agc-79

gene-Trnaa-agc-80

gene-Trnap-agg-83

gene-Trnas-aga-45

gene-Trnas-aga-46

gene-Trnas-aga-47

gene-Trnat-agu-31

gene-Trnaa-agc-11

gene-Trnaa-agc-12

gene-Trnaa-agc-13

gene-Trnaa-agc-14

gene-Trnaa-agc-15

gene-Trnaa-ggc

gene-Trnal-aag-2

gene-Trnal-aag-3

gene-Trnal-aag-4

gene-Trnal-aag-5

gene-Trnap-agg-14

gene-Trnap-agg-16

gene-Trnap-agg-17

gene-Trnap-agg-18

gene-Trnap-ggg-4

gene-Trnar-acg-2

gene-Trnas-aga-5

gene-Trnas-aga-6

gene-Trnat-agu-2

gene-Trnav-aac-10

gene-Trnav-aac-4

gene-Trnav-aac-5

gene-Trnav-aac-7

gene-Trnav-aac-8

gene-Trnav-aac-9

gene-Trnaa-agc-81

gene-Trnaa-agc-82

gene-Trnaa-agc-83

gene-Trnaa-agc-84

gene-Trnaa-agc-85

gene-Trnaa-agc-86

gene-Trnaa-agc-87

gene-Trnap-agg-84

gene-Trnap-agg-85

gene-Trnap-agg-86

gene-Trnap-agg-87

gene-Trnas-aga-48

gene-Trnas-aga-49

gene-Trnas-aga-50

gene-Trnat-agu-32

gene-Trnat-agu-33

gene-Trnat-agu-34

gene-Trnaa-agc-16

gene-Trnaa-agc-17

gene-Trnaa-agc-18

gene-Trnaa-agc-19

gene-Trnaa-agc-20

gene-Trnaa-agc-21

gene-Trnaa-agc-22

gene-Trnaa-agc-23

gene-Trnaa-ggc-2

gene-Trnap-agg-19

gene-Trnas-aga-7

gene-Trnat-agu-3

gene-Trnav-aac-12

gene-Trnaa-agc-24

gene-Trnaa-agc-25

gene-Trnaa-agc-26

gene-Trnaa-agc-27

gene-Trnaa-agc-28

gene-Trnad-auc

gene-Trnal-aag-6

gene-Trnal-aag-8

gene-Trnap-agg-20

gene-Trnap-agg-21

gene-Trnap-agg-23

gene-Trnap-agg-24

gene-Trnap-agg-25

gene-Trnap-ggg-6

gene-Trnas-aga-10

gene-Trnas-aga-8

gene-Trnas-aga-9

gene-Trnat-agu-5

gene-Trnav-aac-13

gene-Trnav-aac-14

gene-Trnav-aac-15

gene-Trnav-aac-16

gene-Trnaa-agc-29

gene-Trnaa-agc-30

gene-Trnaa-agc-31

gene-Trnaa-agc-32

gene-Trnaa-agc-33

gene-Trnaa-agc-34

gene-Trnaa-agc-35

gene-Trnaa-agc-36

gene-Trnal-aag-10

gene-Trnal-aag-9

gene-Trnap-agg-26

gene-Trnap-agg-27

gene-Trnap-agg-28

gene-Trnap-agg-29

gene-Trnap-agg-30

gene-Trnap-agg-31

gene-Trnap-agg-32

gene-Trnap-agg-33

gene-Trnap-agg92

gene-Trnap-ggg-7

gene-Trnas-aga-12

gene-Trnas-aga-13

gene-Trnas-aga-14

gene-Trnav-aac-17

gene-Trnav-aac-19

gene-Trnaa-agc-37

gene-Trnaa-agc-38

gene-Trnaa-agc-39

gene-Trnaa-agc-40

gene-Trnaa-ggc-4

gene-Trnag-acc-5

gene-Trnal-aag-11

gene-Trnap-agg-34

gene-Trnas-aga-15

gene-Trnav-aac-21

gene-Trnav-aac-22

gene-Trnal-aag-12

gene-Trnal-aag-13

gene-Trnap-agg-35

gene-Trnap-agg-36

gene-Trnap-agg-37

gene-Trnap-agg-38

gene-Trnap-agg-39

gene-Trnap-agg-40

gene-Trnap-ggg-8

gene-Trnas-aga-16

gene-Trnas-aga-17

gene-Trnat-agu-7

gene-Trnat-agu-8

gene-Trnat-agu-9

gene-Trnav-aac-23

gene-Trnav-aac-24

gene-Trnaa-agc-41

gene-Trnaa-agc-42

gene-Trnaa-agc-43

gene-Trnaa-agc-44

gene-Trnaa-ggc-5

gene-Trnag-acc-6

gene-Trnal-aag-14

gene-Trnap-agg-41

gene-Trnap-agg-42

gene-Trnap-agg-43

gene-Trnap-agg-44

gene-Trnap-agg-45

gene-Trnap-agg-46

gene-Trnap-agg-47

gene-Trnap-agg-48

gene-Trnas-aga-18

gene-Trnas-aga-19

gene-Trnas-aga-20

gene-Trnaa-agc-45

gene-Trnaa-agc-46

gene-Trnal-aag-15

gene-Trnap-agg-49

gene-Trnap-agg-51

gene-Trnap-agg-52

gene-Trnas-aga-21

gene-Trnat-agu-10

gene-Trnat-agu-11

gene-Trnav-aac-25

gene-Trnav-aac-26

gene-Trnav-aac-27

gene-Trnav-aac-28

gene-Trnaa-agc-88

gene-Trnaa-agc-89

gene-Trnaa-agc-90

gene-Trnaa-cgc-6

gene-Trnad-auc-3

gene-Trnap-agg-88

gene-Trnap-agg-89

gene-Trnas-aga-52

gene-Trnat-agu-35

gene-Trnav-aac-43

gene-Trnav-aac-44
