# Supplementary material for: Construction and evaluation of a new rat reference genome assembly, GRCr8, from long reads and long-range scaffolding
Source: HighWire-hosted journal article supplement (doi:10.1101/gr.279292.124), 2024-11-01
Supplement: Supplemental_Table_S3.docx [file Supplemental_Table_S3.docx]

Supplemental Table 3

List of rat strain ID’s and NCBI SRA accessions used for initial variant detection between each strain and mRatBN7.2 and subsequent reevaluation of variants between the strains and GRCr8.

**Strain SRA ID**

ACI/EurMcwi ERR224446

ACI/N SRR7755593

BN/NHsdMcwi SRR14880437

BN/NHsdMcwi SRR14880436

BN/NHsdMcwi SRR14880439

BN/NHsdMcwi ERR5309015 ERR5309016 ERR5309017 ERR5309018 ERR5309019 ERR5309020 ERR5309021 ERR5309022

BUF/N SRR7755597

DA/BklArbNsi SRR351198 SRR351199 SRR351207 SRR351208 SRR351209 SRR351210 SRR351211 SRR351212

F344/N SRR7755598

F344/NCrl ERR224448

F344/NHsd SRR351197 SRR351200 SRR351201 SRR351202 SRR351203 SRR351204 SRR351205 SRR351206

F344/Stm DRR002169

FHH/EurMcwi ERR224449

FXW1/Eer SRR24348520

FXW2/Eer SRR24348519

HSRA/Ummc SRR10233452

LE/Stm ERR224452

LEW/Crl ERR224453

LEW/NCrl ERR224454

LH/MavRrrc ERR224455

LH/MavRrrcAek SRR24926795

LL/MavRrrc ERR224457

LL/MavRrrcAek SRR24926794

LN/MavRrrc ERR224456

LN/MavRrrcAek SRR24926793

M520/N SRR7755599

MHS/Gib ERR224458

MNS/Gib ERR224459

MR/N SRR7755600

SBH/Ygl ERR224460

SBN/Ygl ERR224461

SHR/NHsd ERR224462

SHRSP/Gcrc ERR224463

SR/Jr ERR224464

SS/JrHsdMcwi ERR224466

WAG/Rij ERR224467

WKY/Gcrc ERR224469

WKY/N SRR7755596

WKY/NCrl ERR224468

WLI/Eer SRR24348525

WMI/Eer SRR24348524

WN/N SRR7755595
