# Supplementary material for: Construction and evaluation of a new rat reference genome assembly, GRCr8, from long reads and long-range scaffolding
Source: HighWire-hosted journal article supplement (doi:10.1101/gr.279292.124), 2024-11-01
Supplement: Supplemental_Table_S4.docx [file Supplemental_Table_S4.docx]

Supplemental_Table_4.

Homozygous differences that remain between the GRCr8 assembly and sequence data from the same strain after polishing.

#CHROM POS REF ALT

CM070391.1 889881 C T

CM070391.1 2797336 ACT A

CM070391.1 3792435 T TTC

CM070391.1 3828994 TTC T

CM070391.1 4577292 TC T

CM070391.1 4963824 CG C

CM070391.1 5121398 C CT

CM070391.1 5815387 CAG C

CM070391.1 6001989 CGT C

CM070391.1 6535280 CCA C

CM070391.1 6646702 CCT C

CM070391.1 7062870 CGT C

CM070391.1 7073522 CCT C

CM070391.1 8262056 G GAAGAAAGA

CM070391.1 8434212 TTAGA T

CM070391.1 8486798 GAGA G

CM070391.1 8893287 TCTCC T

CM070391.1 9033559 TGC T

CM070391.1 9056032 GGA G

CM070391.1 9151698 CG C

CM070391.1 9236520 C CT

CM070391.1 9622811 TTC T

CM070391.1 10013182 GGA G

CM070391.1 10124143 C CAAAAAAAAAA

CM070391.1 10318362 C CATAT

CM070391.1 11060995 CCTTT C

CM070391.1 11406510 GATAT G

CM070391.1 11628846 GGA G

CM070391.1 12503486 T TTAA

CM070391.1 12545538 TTC T

CM070391.1 13085255 T TAA

CM070391.1 13970486 G GA

CM070391.1 14798996 AG A

CM070391.1 15748476 GCT G

CM070391.1 16272670 GCT G

CM070391.1 17558482 GGA G

CM070391.1 17916574 GC G

CM070391.1 18132535 C CAAAAAA

CM070391.1 18285306 AAT A

CM070391.1 18392136 TTC T

CM070391.1 18965287 A ACTCT

CM070391.1 20878624 GGATA G

CM070391.1 20960785 T TAA

CM070391.1 21752505 TG T

CM070391.1 22267845 TAG T

CM070391.1 22625892 T TTCTC

CM070391.1 22650441 T TGA

CM070391.1 24090507 A ATG

CM070391.1 24134596 TAC T

CM070391.1 24220758 ATC A

CM070391.1 24987192 GCCC G

CM070391.1 25115060 ATG A

CM070391.1 25375262 GGA G

CM070391.1 25990860 CCTT C

CM070391.1 27145663 CCT C

CM070391.1 27732319 A AGT

CM070391.1 28089152 GGA G

CM070391.1 28358519 TGA T

CM070391.1 28849274 TC T

CM070391.1 29060943 C CT

CM070391.1 29161012 CTCT C

CM070391.1 31687352 G GGAGA

CM070391.1 33066558 T TTCTC

CM070391.1 33441748 ATC A

CM070391.1 34273625 C CTGT

CM070391.1 34731263 A AAAGG

CM070391.1 35323144 AGTGT A

CM070391.1 35536953 G GTCTC

CM070391.1 36878717 TCC T

CM070391.1 37400102 AAAG A

CM070391.1 37809062 ATATATC A

CM070391.1 38704252 AT A

CM070391.1 40642405 CGAGA C

CM070391.1 40870919 AC A

CM070391.1 41303929 ATC A

CM070391.1 41612026 A C

CM070391.1 42319358 TTC T

CM070391.1 42328645 G GTTTTTTTTTTTTT

CM070391.1 42571677 CAT C

CM070391.1 43030114 A AAGAT

CM070391.1 43040560 AAGAT A

CM070391.1 43094679 CCG C

CM070391.1 43376493 TTTC T

CM070391.1 43484756 TCC T

CM070391.1 43539432 GTA G

CM070391.1 43954386 A G

CM070391.1 44562156 CAGAA C

CM070391.1 44757045 CTTT C

CM070391.1 45052236 TGA T

CM070391.1 45141057 T TTG

CM070391.1 45700613 TTGTGTG T

CM070391.1 45870110 G A

CM070391.1 46035897 GTCTA G

CM070391.1 46661635 GGA G

CM070391.1 47417130 CCT C

CM070391.1 47810165 AAG A

CM070391.1 48294888 CG C

CM070391.1 48767924 AAAAT A

CM070391.1 49854141 TGC T

CM070391.1 49954158 C CAGAT

CM070391.1 50315386 GGAGAGA G

CM070391.1 50457185 CCTTT C

CM070391.1 50901146 AAAAG A

CM070391.1 51089353 CCTCT C

CM070391.1 52089868 TTA T

CM070391.1 53583073 CAG C

CM070391.1 53909205 GGA G

CM070391.1 54103242 TTC T

CM070391.1 54168078 T TGATA

CM070391.1 54609294 GCT G

CM070391.1 55668927 GGA G

CM070391.1 56197058 CTCTA C

CM070391.1 56455264 C T

CM070391.1 56618957 C CT

CM070391.1 56618960 CT C

CM070391.1 56850846 GTCTA G

CM070391.1 57114686 T TC

CM070391.1 57394887 TAAGA T

CM070391.1 57895198 C T

CM070391.1 58718028 G GTA

CM070391.1 59651065 C CAT

CM070391.1 60322459 GATAT G

CM070391.1 60567916 GATATATAT G

CM070391.1 61060603 C CTCCT

CM070391.1 61144587 T C

CM070391.1 61598598 AAC A

CM070391.1 62007970 TTC T

CM070391.1 62716858 T TTATA

CM070391.1 63189829 A ATATT

CM070391.1 63232267 T G

CM070391.1 63572379 CATTT C

CM070391.1 65257027 TTC T

CM070391.1 65484944 AGT A

CM070391.1 65857893 AATAC A

CM070391.1 65973228 T TTATC

CM070391.1 66574553 C CATTT

CM070391.1 66681578 GAAGA G

CM070391.1 66830701 G GAGA

CM070391.1 67548558 C CATAT

CM070391.1 67622983 GGA G

CM070391.1 68931948 G GTTTTTTTT

CM070391.1 69414375 G GA

CM070391.1 69835734 C CAAAAAAAAAAAAA

CM070391.1 69925147 GTTC G

CM070391.1 70847622 C CATAT

CM070391.1 71263122 GATAT G

CM070391.1 71294017 CAT C

CM070391.1 71416245 GTCTA G

CM070391.1 72255947 CGGA C

CM070391.1 72739460 G GGGA

CM070391.1 73139262 C CT

CM070391.1 73161286 C CAT

CM070391.1 73222300 AAG A

CM070391.1 73293868 AAT A

CM070391.1 73404588 TTCC T

CM070391.1 73731485 TGATA T

CM070391.1 73826277 TGATA T

CM070391.1 74224256 GTC G

CM070391.1 74628792 A G

CM070391.1 74628803 A G

CM070391.1 74856044 A ATG

CM070391.1 75596768 C CTTT

CM070391.1 75764273 CAT C

CM070391.1 75869448 TATA T

CM070391.1 75896019 C CAAA

CM070391.1 75987296 CTG C

CM070391.1 76252918 A AC

CM070391.1 76427332 GCATA G

CM070391.1 76562238 TTC T

CM070391.1 76709303 TG T

CM070391.1 77104973 G GGAGA

CM070391.1 77311224 TGA T

CM070391.1 77628846 A AAT

CM070391.1 78404464 C CCCT

CM070391.1 78590749 TTCTA T

CM070391.1 78658706 C CTCTA

CM070391.1 78702571 CGTAT C

CM070391.1 78860030 T TTATA

CM070391.1 79107928 ACT A

CM070391.1 79992422 GTA G

CM070391.1 80012533 A AATAT

CM070391.1 80054396 A AAT

CM070391.1 80266849 G A

CM070391.1 80321420 TAG T

CM070391.1 81057698 G GAAGA

CM070391.1 81509704 GGA G

CM070391.1 81561799 G A

CM070391.1 81561800 T A

CM070391.1 81561808 A G

CM070391.1 81974365 TGATA T

CM070391.1 82055791 G GTTTTTGTTTTTTTTT

CM070391.1 82350345 GATAC G

CM070391.1 82533809 TTAGATAGA T

CM070391.1 82681552 CTG C

CM070391.1 84082463 T TA

CM070391.1 84152308 T C

CM070391.1 84446973 A G

CM070391.1 84942035 G A

CM070391.1 85007191 ATC A

CM070391.1 85318265 AAT A

CM070391.1 85348647 A G

CM070391.1 85863839 CA C

CM070391.1 86047393 G GAC

CM070391.1 86098687 C CTTTTTTTTTTTTTTTTT

CM070391.1 86158977 CG C

CM070391.1 86166192 CATCT C

CM070391.1 86324430 ATC A

CM070391.1 86364808 G T

CM070391.1 86380167 G GA

CM070391.1 86707084 GGA G

CM070391.1 86850217 CG C

CM070391.1 87289236 T A

CM070391.1 87502040 G GAT

CM070391.1 87949816 A G

CM070391.1 87951662 A ACTT

CM070391.1 88237444 GGA G

CM070391.1 88502542 G GTA

CM070391.1 88531406 GGA G

CM070391.1 88582324 GTC G

CM070391.1 88654798 C CTTTTTTTTTTTTTT

CM070391.1 88772469 GCACA G

CM070391.1 88820905 GTCTA G

CM070391.1 88909400 T A

CM070391.1 89357072 GGA G

CM070391.1 89521232 C CA

CM070391.1 89872965 ACTCT A

CM070391.1 90049360 G GT

CM070391.1 90229578 C CATAT

CM070391.1 90533280 GGA G

CM070391.1 90580473 A AAG

CM070391.1 91108073 TTC T

CM070391.1 91260486 A G

CM070391.1 91264040 G GTC

CM070391.1 91394659 TTC T

CM070391.1 91482693 TTC T

CM070391.1 91540887 G GGA

CM070391.1 91652628 AAG A

CM070391.1 91824393 C CTAGATAGA

CM070391.1 92102663 TTGTG T

CM070391.1 92325061 TTC T

CM070391.1 92682955 CCTCT C

CM070391.1 92738497 TGG T

CM070391.1 92764313 C CT

CM070391.1 93080657 TTC T

CM070391.1 93130268 ACG A

CM070391.1 93336153 C CAAAAAAAAAAAAAAA

CM070391.1 93361494 G GCA

CM070391.1 93544068 C CCTT

CM070391.1 93953773 A C

CM070391.1 94164747 TGAA T

CM070391.1 94544021 A AGT

CM070391.1 94566115 TC T

CM070391.1 94598118 C CT

CM070391.1 94754650 GAGA G

CM070391.1 94979421 GAGAAGAAGA G

CM070391.1 95171474 GC G

CM070391.1 95244917 AAT A

CM070391.1 95312804 CG C

CM070391.1 95537017 G GAGA

CM070391.1 95581616 TTATATA T

CM070391.1 96038728 CAGAG C

CM070391.1 96244160 TC T

CM070391.1 96346150 GC G

CM070391.1 96391191 T TTTTC

CM070391.1 96407528 ATC A

CM070391.1 96417145 ATAT A

CM070391.1 96763081 C CT

CM070391.1 96835085 ATC A

CM070391.1 97002058 G A

CM070391.1 97682492 CAG C

CM070391.1 97716982 CTCT C

CM070391.1 97954313 GGA G

CM070391.1 98211181 G GAT

CM070391.1 98823667 TAC T

CM070391.1 99237970 TGATA T

CM070391.1 99414647 CCT C

CM070391.1 99676174 G GCCCC

CM070391.1 99961806 CG C

CM070391.1 100358575 GC G

CM070391.1 100398822 CTTCT C

CM070391.1 100460659 T TAC

CM070391.1 100469438 G GT

CM070391.1 100979886 ACT A

CM070391.1 101474874 CAGAT C

CM070391.1 101731469 A ATC

CM070391.1 102590214 C CTTTT

CM070391.1 103420634 GGA G

CM070391.1 103796857 CTATA C

CM070391.1 104948567 CGAGA C

CM070391.1 106125110 A AC

CM070391.1 106409133 C CAG

CM070391.1 106502269 CAG C

CM070391.1 106581197 C CAAAA

CM070391.1 106624589 G GGA

CM070391.1 106873768 CAG C

CM070391.1 107062456 TGAGA T

CM070391.1 107171980 C CAAAAA

CM070391.1 107209329 C CCTCT

CM070391.1 108803009 TC T

CM070391.1 108845565 A T

CM070391.1 109098487 CAGAG C

CM070391.1 109686277 T TA

CM070391.1 109921753 CCTCT C

CM070391.1 110579130 T TTATA

CM070391.1 111260957 T TTTCTTC

CM070391.1 111434315 GTA G

CM070391.1 111749804 CAT C

CM070391.1 111969748 TTC T

CM070391.1 112061252 CCT C

CM070391.1 112166364 AAGAGAG A

CM070391.1 112195318 GGAA G

CM070391.1 113413499 GTATA G

CM070391.1 113462181 G GTTTT

CM070391.1 113596621 C T

CM070391.1 113642372 TTC T

CM070391.1 116720868 TTA T

CM070391.1 116820158 ATATC A

CM070391.1 116820264 CATCT C

CM070391.1 118047311 CATTT C

CM070391.1 119290795 G GTTTTTTTTTTTTTTTTTTTTTTTTT

CM070391.1 120017893 A G

CM070391.1 120029608 C A

CM070391.1 120029609 C G

CM070391.1 120029655 G C

CM070391.1 120031210 T C

CM070391.1 120031444 A C

CM070391.1 120031558 T TCAC

CM070391.1 120031561 A T

CM070391.1 120740945 G GTTC

CM070391.1 121779581 AAG A

CM070391.1 122667845 G C

CM070391.1 122826356 CTCT C

CM070391.1 122873051 A AATAT

CM070391.1 124162514 G GTA

CM070391.1 124650324 A AATAT

CM070391.1 124750975 TACA T

CM070391.1 126428969 C CTTTTTTTTT

CM070391.1 126802029 GAGA G

CM070391.1 126805449 ATC A

CM070391.1 127382515 C CATCT

CM070391.1 127636564 AATAG A

CM070391.1 127832591 TCA T

CM070391.1 127866338 CT C

CM070391.1 127954100 G GTTTTTTT

CM070391.1 128514507 TGA T

CM070391.1 128556417 AAAATAAAT A

CM070391.1 129528224 A G

CM070391.1 130186232 G GGA

CM070391.1 130194722 GGAGAA G

CM070391.1 131000453 C CA

CM070391.1 131266047 GTCTA G

CM070391.1 131571681 C CATT

CM070391.1 132048013 GGA G

CM070391.1 133018566 A ATC

CM070391.1 133226413 TG T

CM070391.1 133404352 GGA G

CM070391.1 133573239 C CA

CM070391.1 133575362 C CTAGA

CM070391.1 133792411 T TTAA

CM070391.1 134560776 TTC T

CM070391.1 134561555 GGA G

CM070391.1 134934595 CAG C

CM070391.1 135125090 A AAAT

CM070391.1 135601099 G GT

CM070391.1 135673676 G GATAT

CM070391.1 137262085 TTG T

CM070391.1 137794414 TTC T

CM070391.1 137826615 TTC T

CM070391.1 137902873 C CAGAGAGAG

CM070391.1 138129036 AAAT A

CM070391.1 138195135 C CTTTTTTTT

CM070391.1 138416581 GGA G

CM070391.1 139088657 CG C

CM070391.1 139442219 C G

CM070391.1 140014686 CAG C

CM070391.1 140158862 T G

CM070391.1 140744151 C CATAT

CM070391.1 141355220 TTC T

CM070391.1 141392368 GGA G

CM070391.1 141441188 CTCT C

CM070391.1 141601608 TTC T

CM070391.1 141988026 AAGAT A

CM070391.1 141995439 T TGATA

CM070391.1 142022968 T TGATA

CM070391.1 142263769 C A

CM070391.1 142539645 GA G

CM070391.1 142539647 G C

CM070391.1 142549401 T C

CM070391.1 142914758 TCTTC T

CM070391.1 143179445 G GT

CM070391.1 143269707 G GA

CM070391.1 143467071 GC G

CM070391.1 143763621 CGG C

CM070391.1 143982344 TG T

CM070391.1 144167907 G GA

CM070391.1 144212153 AACAC A

CM070391.1 144474105 C CAAAAAAAAAAAAA

CM070391.1 144526528 TC T

CM070391.1 144768096 C CAAAAA

CM070391.1 146254830 ATCTG A

CM070391.1 146418938 AATCT A

CM070391.1 146639236 TCTTCCTTC T

CM070391.1 147339661 T TTCTC

CM070391.1 147899185 G GAT

CM070391.1 148296753 A AAC

CM070391.1 148317505 CTATT C

CM070391.1 148757708 CTCT C

CM070391.1 148757855 ATCT A

CM070391.1 148944230 C CAT

CM070391.1 149191718 TTATA T

CM070391.1 149436000 CATAT C

CM070391.1 149734686 C CT

CM070391.1 149857109 T A

CM070391.1 149857110 TA T

CM070391.1 149857114 G T

CM070391.1 150136500 A AAC

CM070391.1 151005486 AAT A

CM070391.1 152922084 GCA G

CM070391.1 154134302 GGA G

CM070391.1 154293233 GGA G

CM070391.1 154327195 ACG A

CM070391.1 155023698 CAG C

CM070391.1 155082885 C CATCT

CM070391.1 155645098 T C

CM070391.1 155918915 GAAGA G

CM070391.1 156498908 CCTTT C

CM070391.1 157884222 G GTCTATCTA

CM070391.1 158203774 GGA G

CM070391.1 159067397 C G

CM070391.1 159297606 T TC

CM070391.1 159985310 T TC

CM070391.1 162392226 TC T

CM070391.1 162741587 TGA T

CM070391.1 162824824 A G

CM070391.1 163390534 AGTGT A

CM070391.1 163499100 ATC A

CM070391.1 163877088 TC T

CM070391.1 164179573 G GGATA

CM070391.1 164379083 C CT

CM070391.1 164449187 ATC A

CM070391.1 164457915 C CA

CM070391.1 164475236 T TTCTA

CM070391.1 164489683 TCCC T

CM070391.1 164580329 TA T

CM070391.1 164580532 T A

CM070391.1 164591846 T TATATA

CM070391.1 164733741 AC A

CM070391.1 165354908 C CA

CM070391.1 165614798 GTATA G

CM070391.1 165851056 CG C

CM070391.1 166167835 TTC T

CM070391.1 166852301 G GGAGA

CM070391.1 167110545 TTC T

CM070391.1 168228216 AG A

CM070391.1 168312711 TTC T

CM070391.1 168961769 TTC T

CM070391.1 169642596 G GGT

CM070391.1 169665610 G GTTT

CM070391.1 169762189 GTTTT G

CM070391.1 170453501 CG C

CM070391.1 171216538 GGA G

CM070391.1 172351968 GTAGAA G

CM070391.1 172376642 TC T

CM070391.1 172379544 G GT

CM070391.1 172560432 C CCTAT

CM070391.1 172707579 GTC G

CM070391.1 173642087 TTC T

CM070391.1 176523410 C CA

CM070391.1 177177148 TTC T

CM070391.1 177229739 TGTGTGTG T

CM070391.1 177352511 CCTTT C

CM070391.1 177513925 T TGATA

CM070391.1 177699276 GAGA G

CM070391.1 179536470 GTC G

CM070391.1 179880901 CAT C

CM070391.1 180513692 TTCC T

CM070391.1 180705374 GGAGA G

CM070391.1 181036987 AATAG A

CM070391.1 181846490 TTC T

CM070391.1 181862543 AG A

CM070391.1 182359003 C CTTT

CM070391.1 182492490 A C

CM070391.1 182964359 C CATCT

CM070391.1 183281051 TTG T

CM070391.1 183720775 T TTG

CM070391.1 183760117 A ACT

CM070391.1 183780241 GGA G

CM070391.1 185449977 GGA G

CM070391.1 185797145 C CAAAAAAA

CM070391.1 186329694 TCC T

CM070391.1 186591440 GAC G

CM070391.1 186614807 CAGAA C

CM070391.1 186835925 AGTGT A

CM070391.1 186859194 GGATA G

CM070391.1 186910063 CCTCT C

CM070391.1 187784489 G A

CM070391.1 188258518 GCA G

CM070391.1 188650070 TTC T

CM070391.1 189601588 CG C

CM070391.1 189772423 A AAC

CM070391.1 190387861 T TTC

CM070391.1 190404006 C CAAAAAAAAAAAA

CM070391.1 190679335 TGAAGAAGAA T

CM070391.1 190818417 TG T

CM070391.1 190886829 C CTT

CM070391.1 191223287 CA C

CM070391.1 191707711 G GA

CM070391.1 191855006 C CTTTTTTTTTTTTTTT

CM070391.1 191953616 TG T

CM070391.1 192072219 GGA G

CM070391.1 192084211 C CTATA

CM070391.1 192474172 A AAAT

CM070391.1 192610737 CTGTG C

CM070391.1 192856109 TCA T

CM070391.1 192883565 C CATGT

CM070391.1 193057434 CTCTT C

CM070391.1 193287033 GTC G

CM070391.1 193305513 G GTTTTTTTTTTTTTTTTTTT

CM070391.1 193486042 G T

CM070391.1 193778887 CAG C

CM070391.1 194050846 AAG A

CM070391.1 194252357 CTGTG C

CM070391.1 194566809 TTC T

CM070391.1 194570924 G GTTTTTTTTTTTTTTTTTTTTT

CM070391.1 194598730 G GT

CM070391.1 195150578 C CCTTT

CM070391.1 195948951 AAG A

CM070391.1 196510124 TGC T

CM070391.1 196628618 T TAAA

CM070391.1 196740628 TTC T

CM070391.1 197371369 A AAAAT

CM070391.1 198595730 C CGCACGCAG

CM070391.1 198997469 CTCTT C

CM070391.1 199492657 CTCT C

CM070391.1 200102230 CT C

CM070391.1 200115582 C CTG

CM070391.1 200691329 ATC A

CM070391.1 200978670 GGAA G

CM070391.1 201052924 ATC A

CM070391.1 201280405 G GT

CM070391.1 201301781 C CAT

CM070391.1 202187746 TGA T

CM070391.1 202413213 AC A

CM070391.1 202416676 TTATC T

CM070391.1 202491039 CATCTAT C

CM070391.1 202758014 GGAGGA G

CM070391.1 205883869 TA T

CM070391.1 206292553 C CCCAT

CM070391.1 206297860 C T

CM070391.1 206444763 TGC T

CM070391.1 207030670 ATC A

CM070391.1 207590697 A AAGAT

CM070391.1 207842675 TTC T

CM070391.1 208000322 C CTTTTTT

CM070391.1 208283061 C CT

CM070391.1 208946372 TTC T

CM070391.1 209114698 CG C

CM070391.1 210086251 TG T

CM070391.1 210372892 GCCC G

CM070391.1 210617444 AAAG A

CM070391.1 211091906 CG C

CM070391.1 211131428 CGA C

CM070391.1 211189647 AAG A

CM070391.1 211204085 C CTTA

CM070391.1 211370595 CCT C

CM070391.1 211370603 C CT

CM070391.1 212647668 C T

CM070391.1 212647674 T C

CM070391.1 212647677 C T

CM070391.1 213167089 C CGT

CM070391.1 213940924 CG C

CM070391.1 213983052 TCC T

CM070391.1 214284025 G GTTTTTT

CM070391.1 214861110 AAGAT A

CM070391.1 214983488 A AGT

CM070391.1 214983846 TGC T

CM070391.1 214991655 GGAA G

CM070391.1 215269974 AC A

CM070391.1 215986371 C CT

CM070391.1 216713461 ATC A

CM070391.1 217272156 GGA G

CM070391.1 217411215 TTTC T

CM070391.1 217482314 G C

CM070391.1 217695564 TTACA T

CM070391.1 217708103 T TCA

CM070391.1 218057799 C CATAG

CM070391.1 218228566 CT C

CM070391.1 220667880 ATC A

CM070391.1 220800935 G GATAC

CM070391.1 221967431 TGA T

CM070391.1 222501619 TTC T

CM070391.1 222568629 T TAAAA

CM070391.1 222859499 A AC

CM070391.1 223249983 AGT A

CM070391.1 223623750 CCT C

CM070391.1 224359799 A AATCT

CM070391.1 224391665 T TTTCC

CM070391.1 224405108 C CCTTT

CM070391.1 224796482 GTA G

CM070391.1 224799069 AAC A

CM070391.1 224905214 A G

CM070391.1 225587165 T TTATATA

CM070391.1 226074494 GTTC G

CM070391.1 226323596 A AAT

CM070391.1 226624858 TTC T

CM070391.1 226786423 G GAT

CM070391.1 227356347 CCT C

CM070391.1 227438163 AAT A

CM070391.1 227450044 TAC T

CM070391.1 227948909 ATC A

CM070391.1 228364723 G GTAGA

CM070391.1 228570597 TC T

CM070391.1 228635850 TG T

CM070391.1 228826783 GC G

CM070391.1 228997505 TTTC T

CM070391.1 229654978 CTCT C

CM070391.1 229883577 G GGATA

CM070391.1 230144058 GC G

CM070391.1 230349887 ACTCTCT A

CM070391.1 230400278 C CA

CM070391.1 230471343 AAC A

CM070391.1 230800134 G GGA

CM070391.1 231264873 CA C

CM070391.1 231367428 T TTCTA

CM070391.1 231390120 A G

CM070391.1 231390160 T TTG

CM070391.1 231390167 A AC

CM070391.1 231390230 A G

CM070391.1 231390268 G A

CM070391.1 231390269 C T

CM070391.1 231390289 C T

CM070391.1 231390293 A C

CM070391.1 231390303 T C

CM070391.1 231390344 T C

CM070391.1 231390378 T C

CM070391.1 231390415 G A

CM070391.1 231390436 C T

CM070391.1 231390474 C T

CM070391.1 231390484 AT A

CM070391.1 231390487 T TA

CM070391.1 231390490 T C

CM070391.1 231390534 G A

CM070391.1 231390537 C T

CM070391.1 231390544 C T

CM070391.1 231390545 A G

CM070391.1 231390550 C T

CM070391.1 231390566 C T

CM070391.1 231390570 T A

CM070391.1 231390578 G A

CM070391.1 231390593 C T

CM070391.1 231390635 C T

CM070391.1 231390646 A C

CM070391.1 231390648 C T

CM070391.1 231390657 T A

CM070391.1 231390670 A G

CM070391.1 231914801 C CAG

CM070391.1 231934437 CCT C

CM070391.1 231944525 G GAA

CM070391.1 232438886 TC T

CM070391.1 232543048 CT C

CM070391.1 232543091 TC T

CM070391.1 232543106 CTCT C

CM070391.1 232698830 C CTTT

CM070391.1 233297480 AGTAT A

CM070391.1 233558902 TG T

CM070391.1 233685015 TTG T

CM070391.1 233742139 T G

CM070391.1 233757758 C CAAAA

CM070391.1 234150285 TA T

CM070391.1 235407628 T TGA

CM070391.1 235475329 TG T

CM070391.1 235619900 TG T

CM070391.1 237180160 TTGTG T

CM070391.1 237381334 T C

CM070391.1 238259627 TCC T

CM070391.1 238805295 C CTT

CM070391.1 239110159 TTTC T

CM070391.1 239151989 TAC T

CM070391.1 239691327 GGA G

CM070391.1 240334635 CG C

CM070391.1 241393607 T TAAAAAA

CM070391.1 241793866 GGAGAA G

CM070391.1 241982775 AG A

CM070391.1 242519619 C CAGA

CM070391.1 242857577 G A

CM070391.1 243230053 AG A

CM070391.1 244052706 CT C

CM070391.1 244093527 CTTCT C

CM070391.1 244518821 TG T

CM070391.1 244540038 GT G

CM070391.1 244617733 TGA T

CM070391.1 244691514 AGGGGAG A

CM070391.1 245066552 AAC A

CM070391.1 245155315 TCTC T

CM070391.1 246193982 CCT C

CM070391.1 246274107 C CAT

CM070391.1 246582098 A AATCT

CM070391.1 246636083 A G

CM070391.1 246786183 T G

CM070391.1 246786184 G T

CM070391.1 246786971 A AC

CM070391.1 248162565 AAAAG A

CM070391.1 249123521 A AAAGG

CM070391.1 250467360 TGGA T

CM070391.1 250595704 CG C

CM070391.1 251116394 GGA G

CM070391.1 252408728 AT A

CM070391.1 252657431 CG C

CM070391.1 253289365 GGA G

CM070391.1 253300905 GGAAA G

CM070391.1 253667035 GAGA G

CM070391.1 253801953 ACT A

CM070391.1 254146759 C CCT

CM070391.1 254303218 C CTTTTTTTTTTTTTTT

CM070391.1 254770569 T TA

CM070391.1 255078226 CG C

CM070391.1 255188200 T TA

CM070391.1 255192708 G GT

CM070391.1 255327857 C CGGGG

CM070391.1 255957138 C CTTTTTTTTTTTTTTT

CM070391.1 256482191 AG A

CM070391.1 256788414 G GCA

CM070391.1 256901200 ATCT A

CM070391.1 257388039 G GTATC

CM070391.1 258162437 CCTTT C

CM070391.1 258269181 T G

CM070391.1 258383703 A G

CM070391.1 258404893 C A

CM070391.1 259131977 TGA T

CM070391.1 261574257 TTGC T

CM070391.1 261631034 CATAT C

CM070391.1 261911344 TTC T

CM070391.1 262291323 G GT

CM070391.1 262583437 C CCTTCTT

CM070391.1 263269617 G GTA

CM070391.1 263358334 CTTCT C

CM070391.1 263898414 TGAAA T

CM070391.1 264246952 GGA G

CM070391.1 264255243 AATAG A

CM070391.1 265088012 TGAA T

CM070391.1 265088143 G GGAA

CM070391.1 265202060 GTC G

CM070391.1 265308119 T TC

CM070391.1 265718496 CAG C

CM070391.1 266471308 CAG C

CM070391.1 267270346 CA C

CM070391.1 267685280 CG C

CM070391.1 268052456 GTA G

CM070391.1 268226880 C CAT

CM070391.1 268407508 TA T

CM070391.1 269657700 C CA

CM070391.1 270279868 CG C

CM070391.1 270518135 GGGTTA G

CM070392.1 1095283 C CT

CM070392.1 1855219 C T

CM070392.1 3717473 GT G

CM070392.1 4087757 G GATATAT

CM070392.1 4361732 AAG A

CM070392.1 5262007 AGT A

CM070392.1 5869119 TGA T

CM070392.1 6555538 ACTAT A

CM070392.1 7730065 C A

CM070392.1 8299654 TTTC T

CM070392.1 8421781 CAT C

CM070392.1 8516995 AATCC A

CM070392.1 9421475 GGA G

CM070392.1 9583350 G T

CM070392.1 10482007 GCT G

CM070392.1 10630965 ACTCT A

CM070392.1 10700930 CCTCT C

CM070392.1 11396794 CTCT C

CM070392.1 12014383 TTC T

CM070392.1 13663925 G GCT

CM070392.1 14025516 GAA G

CM070392.1 14668048 T G

CM070392.1 14668049 A T

CM070392.1 14668052 C T

CM070392.1 14969002 T C

CM070392.1 15115998 CA C

CM070392.1 15673269 C CTTTTTTTTTTTT

CM070392.1 15752471 G GGTGT

CM070392.1 16749904 A ATC

CM070392.1 17215814 GTC G

CM070392.1 17442703 GATAT G

CM070392.1 17541515 T TTA

CM070392.1 18554010 C CT

CM070392.1 18603560 TTC T

CM070392.1 18781289 GGA G

CM070392.1 18928758 T TTC

CM070392.1 19186813 TTC T

CM070392.1 19319352 C CA

CM070392.1 19968408 GAT G

CM070392.1 21023173 A G

CM070392.1 21112249 A AAT

CM070392.1 21166546 A AAAAT

CM070392.1 21433611 CAT C

CM070392.1 22111016 GTA G

CM070392.1 22284811 A ATGG

CM070392.1 22866448 C CAT

CM070392.1 24943264 TTC T

CM070392.1 25021471 C CAT

CM070392.1 25852186 C CTTT

CM070392.1 26128560 AACAC A

CM070392.1 26643330 GGA G

CM070392.1 27064675 AC A

CM070392.1 28403131 GAGA G

CM070392.1 28585565 TAGA T

CM070392.1 28836947 GTATATA G

CM070392.1 28989328 TTCC T

CM070392.1 29686067 GC G

CM070392.1 29782699 G GGA

CM070392.1 30058698 CG C

CM070392.1 30110620 CG C

CM070392.1 30246258 TACAC T

CM070392.1 30259484 C CT

CM070392.1 30355284 G GT

CM070392.1 30589361 A ATCTCTC

CM070392.1 31009349 CGT C

CM070392.1 31295912 CCCT C

CM070392.1 32140169 T TTATATA

CM070392.1 32367237 CGA C

CM070392.1 32824978 TTC T

CM070392.1 32844526 C CAA

CM070392.1 33428312 TGC T

CM070392.1 33954136 AAAG A

CM070392.1 34104466 TGC T

CM070392.1 35512004 A AAGAT

CM070392.1 35588923 GC G

CM070392.1 36249946 C CAT

CM070392.1 36554977 C CAGAT

CM070392.1 36708032 CG C

CM070392.1 37689113 C CAAAA

CM070392.1 37807691 GACAC G

CM070392.1 38017785 AATAT A

CM070392.1 38246807 G GCAGATA

CM070392.1 38644464 TTA T

CM070392.1 38914178 CCT C

CM070392.1 38960190 C A

CM070392.1 38960191 A G

CM070392.1 39029530 TTTA T

CM070392.1 39087811 GGA G

CM070392.1 39522016 T TGAA

CM070392.1 40026099 TG T

CM070392.1 40368540 A AATCT

CM070392.1 41539974 T TGGA

CM070392.1 41616388 A ATG

CM070392.1 41623510 TCTC T

CM070392.1 41655517 C CA

CM070392.1 41731133 CAG C

CM070392.1 41824329 T TTAA

CM070392.1 41980371 AGTATG A

CM070392.1 42372984 TTATA T

CM070392.1 42574851 C CTCCTTCT

CM070392.1 42740783 GGA G

CM070392.1 43209275 TC T

CM070392.1 43209282 TC T

CM070392.1 43224718 GAGA G

CM070392.1 43282452 GGAAGAA G

CM070392.1 43301076 G GAC

CM070392.1 43301607 C CCA

CM070392.1 43928263 TTTC T

CM070392.1 44031359 GTCT G

CM070392.1 44314690 TC T

CM070392.1 44371539 A AATAG

CM070392.1 44742218 AGT A

CM070392.1 44842239 GA G

CM070392.1 45123748 GCA G

CM070392.1 45319708 CCTTT C

CM070392.1 45539733 TGA T

CM070392.1 45780895 GGA G

CM070392.1 46439800 TTC T

CM070392.1 46450235 C CA

CM070392.1 46802531 TTTCTTC T

CM070392.1 47026300 GGT G

CM070392.1 47211062 T TTCC

CM070392.1 47292010 TTTC T

CM070392.1 47405596 TCC T

CM070392.1 47838168 CCTTT C

CM070392.1 47860064 GGA G

CM070392.1 47864431 CCT C

CM070392.1 48021609 CCCTT C

CM070392.1 48301204 G GGT

CM070392.1 48740685 CCT C

CM070392.1 48820086 T TTATA

CM070392.1 49029907 GGA G

CM070392.1 49221989 GGA G

CM070392.1 49819398 C CAAA

CM070392.1 49846436 CCT C

CM070392.1 49865654 TGA T

CM070392.1 49986870 AAG A

CM070392.1 50452170 A C

CM070392.1 50626365 GGAA G

CM070392.1 50808661 G C

CM070392.1 51679539 GGA G

CM070392.1 53154063 G GGATA

CM070392.1 54092960 CG C

CM070392.1 54153483 G GAA

CM070392.1 54186876 GGAGA G

CM070392.1 54582725 AGT A

CM070392.1 55170690 ATTCC A

CM070392.1 56688668 C CATAT

CM070392.1 57156159 TGA T

CM070392.1 57749675 ATC A

CM070392.1 57798456 T TTCC

CM070392.1 57843930 TTC T

CM070392.1 58594313 C CAAAAAAAAAAAAAAAAAAAAAAAA

CM070392.1 58938799 C CT

CM070392.1 59464178 C CTTTTTTTTTTTTTTTTTTTTTTTTTTT

CM070392.1 59562538 AC A

CM070392.1 59690534 G A

CM070392.1 60189280 C CTAT

CM070392.1 60654001 CAGAG C

CM070392.1 61457210 C CTTTT

CM070392.1 61517744 CCTCTT C

CM070392.1 62281730 CTCT C

CM070392.1 64144666 T C

CM070392.1 64216391 C T

CM070392.1 64531140 C CAGA

CM070392.1 64552354 G GGAA

CM070392.1 64611941 TATAATA T

CM070392.1 64828540 G GA

CM070392.1 65666348 A T

CM070392.1 66201016 C CCTT

CM070392.1 66562818 C CAT

CM070392.1 66730055 GTA G

CM070392.1 67057711 CTG C

CM070392.1 67574836 C CAT

CM070392.1 68163884 TAC T

CM070392.1 69102711 C A

CM070392.1 69219902 AC A

CM070392.1 69284865 A AAC

CM070392.1 69338185 CCT C

CM070392.1 69659370 TTC T

CM070392.1 69930496 CTCT C

CM070392.1 70846577 T TAC

CM070392.1 71248601 T TTA

CM070392.1 71498524 AAG A

CM070392.1 72035630 GATTT G

CM070392.1 72358070 AAT A

CM070392.1 73246670 AAT A

CM070392.1 73476440 TAC T

CM070392.1 73596005 GTA G

CM070392.1 73673910 GAAAT G

CM070392.1 73880023 C CTCTTCT

CM070392.1 74235913 C CA

CM070392.1 74285794 G GTA

CM070392.1 74395695 G T

CM070392.1 74497104 AAAAG A

CM070392.1 75136536 G GTA

CM070392.1 75403927 G GATTT

CM070392.1 75426339 GGA G

CM070392.1 75789679 A ACT

CM070392.1 75795219 GAAGA G

CM070392.1 76109114 T TTC

CM070392.1 76694527 TGA T

CM070392.1 76888630 TTC T

CM070392.1 76998049 T TGAAA

CM070392.1 76998866 TGATA T

CM070392.1 77227721 CAGAT C

CM070392.1 77387247 G GATA

CM070392.1 77407197 A AAAAT

CM070392.1 77468325 T TTATA

CM070392.1 77472995 TC T

CM070392.1 77595676 TG T

CM070392.1 77605064 T TTTTA

CM070392.1 79265779 GCA G

CM070392.1 79355506 T TTG

CM070392.1 80169919 G GATAT

CM070392.1 80252732 CAT C

CM070392.1 80426546 AAGG A

CM070392.1 80671244 GCTT G

CM070392.1 80691188 C CTCCTCT

CM070392.1 80776954 TGTGC T

CM070392.1 81037356 A C

CM070392.1 81106681 CCTT C

CM070392.1 81214245 CTCTT C

CM070392.1 81287066 G GAGA

CM070392.1 81885321 CGAGA C

CM070392.1 82030222 T G

CM070392.1 82223390 C G

CM070392.1 82223392 G T

CM070392.1 82875557 TTCC T

CM070392.1 83006341 A AG

CM070392.1 83129841 G GAT

CM070392.1 83230936 GAAGA G

CM070392.1 83603594 TGGTA T

CM070392.1 83879093 CAA C

CM070392.1 84822118 C CATCT

CM070392.1 85168494 CTCT C

CM070392.1 85492190 CTG C

CM070392.1 85631861 GGA G

CM070392.1 86230404 T TAAGA

CM070392.1 86558967 C CTTTTT

CM070392.1 86999638 AAG A

CM070392.1 87119107 A AT

CM070392.1 87883481 C A

CM070392.1 88008885 C CAAAAAA

CM070392.1 88423215 C CAAAAAA

CM070392.1 89029854 C CATTT

CM070392.1 91429298 AAG A

CM070392.1 92071368 CG C

CM070392.1 92680697 T TC

CM070392.1 93611445 TTC T

CM070392.1 93689842 CCT C

CM070392.1 94370113 CG C

CM070392.1 94633124 A AACAC

CM070392.1 96135660 G GA

CM070392.1 96508129 TTATA T

CM070392.1 97005900 TTC T

CM070392.1 98185981 CAT C

CM070392.1 98771859 AATAT A

CM070392.1 99434455 GAAGA G

CM070392.1 100558386 ATC A

CM070392.1 100626506 T TTTC

CM070392.1 100850860 TTC T

CM070392.1 100882627 G GTATA

CM070392.1 101111064 G GAT

CM070392.1 101277591 CTCT C

CM070392.1 101654123 AAT A

CM070392.1 102040176 TTA T

CM070392.1 102983420 TTCTC T

CM070392.1 103292659 T TGAAA

CM070392.1 103611700 C CT

CM070392.1 103825918 TTC T

CM070392.1 103860753 G GAGAA

CM070392.1 104653249 AATAT A

CM070392.1 105278819 TTCC T

CM070392.1 106261711 AAGG A

CM070392.1 107704789 TTG T

CM070392.1 108460565 C G

CM070392.1 108460596 A T

CM070392.1 108956109 TTC T

CM070392.1 109251427 GGA G

CM070392.1 109328211 T TA

CM070392.1 109351102 GTAGA G

CM070392.1 109468824 G GAT

CM070392.1 110199661 C CA

CM070392.1 110214522 TTC T

CM070392.1 110437258 G GGA

CM070392.1 110506467 C CT

CM070392.1 111375347 TGC T

CM070392.1 112542236 A AAT

CM070392.1 113030650 GGAA G

CM070392.1 113206450 ATACTAC A

CM070392.1 113341017 C CATCT

CM070392.1 113568872 AGATG A

CM070392.1 113866029 A ATG

CM070392.1 115140360 A ATAT

CM070392.1 115176457 TAC T

CM070392.1 115198537 AGAAG A

CM070392.1 115502657 CCT C

CM070392.1 115583605 GGA G

CM070392.1 115719283 GGA G

CM070392.1 115837540 TCTC T

CM070392.1 115837700 CCTT C

CM070392.1 116608598 CAGA C

CM070392.1 116649259 TCCC T

CM070392.1 116818966 GGAGTA G

CM070392.1 116933360 AAGG A

CM070392.1 116937048 GAAGA G

CM070392.1 117711391 G GTCTA

CM070392.1 118024615 C A

CM070392.1 118151536 T TTATA

CM070392.1 118203850 GGA G

CM070392.1 118208736 CAG C

CM070392.1 118275369 T G

CM070392.1 118454916 TGC T

CM070392.1 119396668 TGC T

CM070392.1 119898527 T TTG

CM070392.1 120202473 ACCCC A

CM070392.1 120372493 CG C

CM070392.1 120870896 C CTTTTTTTTTTTTTTTTTTT

CM070392.1 123009525 AAG A

CM070392.1 123180609 CCT C

CM070392.1 123461563 A AATAG

CM070392.1 123847060 C CA

CM070392.1 123964763 T TGATA

CM070392.1 124097598 CTCTT C

CM070392.1 124229217 G GA

CM070392.1 124256227 GCA G

CM070392.1 125209697 TCCCTCCCCCTCC T

CM070392.1 125298374 ATC A

CM070392.1 126214277 TTC T

CM070392.1 129008731 G GTATA

CM070392.1 129625143 G GTA

CM070392.1 129643470 G GAGA

CM070392.1 130464202 GGA G

CM070392.1 131254484 TC T

CM070392.1 131254850 C CTCT

CM070392.1 131335600 AAAAG A

CM070392.1 131338593 C CT

CM070392.1 131963649 TAG T

CM070392.1 132038669 GAT G

CM070392.1 132171545 G GA

CM070392.1 132391725 TGC T

CM070392.1 132740107 ATAT A

CM070392.1 133554230 T TAC

CM070392.1 133734813 G GAT

CM070392.1 134392567 C CATAT

CM070392.1 134734059 ACT A

CM070392.1 134995469 CTCTCT C

CM070392.1 134995510 T TC

CM070392.1 135060873 T TTC

CM070392.1 135129089 AAG A

CM070392.1 135765755 AAG A

CM070392.1 137375637 A AAT

CM070392.1 138514637 TC T

CM070392.1 139040854 CGA C

CM070392.1 139111523 GGAGA G

CM070392.1 139974780 TC T

CM070392.1 140467098 ACT A

CM070392.1 140673898 TAGAA T

CM070392.1 140872251 A AG

CM070392.1 141193613 C CATAT

CM070392.1 141601844 TCTC T

CM070392.1 141762272 GGAA G

CM070392.1 142163469 TC T

CM070392.1 143206052 C A

CM070392.1 143321327 ATC A

CM070392.1 143710120 TTCTC T

CM070392.1 143863382 TATGG T

CM070392.1 144259264 A AAGAG

CM070392.1 144987926 G GTTTTTTTTTTTTTTT

CM070392.1 145016751 T TTTC

CM070392.1 145237125 G T

CM070392.1 145503446 CTCTT C

CM070392.1 145598631 GTATA G

CM070392.1 145628458 A AATAT

CM070392.1 146279544 CT C

CM070392.1 146558579 CAG C

CM070392.1 146990290 A AATG

CM070392.1 147090514 CATCT C

CM070392.1 147101988 C CT

CM070392.1 147161086 C CT

CM070392.1 147418007 GGA G

CM070392.1 147447648 T TGAC

CM070392.1 148397645 GAGGA G

CM070392.1 149130680 T TGA

CM070392.1 149529469 GTC G

CM070392.1 149620872 A AAT

CM070392.1 150037843 A AAG

CM070392.1 150111989 GAGAT G

CM070392.1 150278573 GCTTCTTCTT G

CM070392.1 150278724 TTTC T

CM070392.1 150283610 TTC T

CM070392.1 150297684 CCTCT C

CM070392.1 150890138 T C

CM070392.1 151017897 G GTA

CM070392.1 151178361 G GTATA

CM070392.1 151452044 CAGAT C

CM070392.1 151607664 AAG A

CM070392.1 151803903 AGAAG A

CM070392.1 151997494 C CAAAAAAAAAAAAAAAAAAAAAA

CM070392.1 152053738 C CAA

CM070392.1 152176349 C CTTTTTTTTTTTTTTTTTTTTTTTTTTTTT

CM070392.1 152575051 TTCTA T

CM070392.1 152669593 A ATG

CM070392.1 152818397 TTCTCTC T

CM070392.1 153061418 CG C

CM070392.1 153102821 C CTCTT

CM070392.1 153233567 GCT G

CM070392.1 154109022 G A

CM070392.1 154302746 G GATAT

CM070392.1 154329782 CATCT C

CM070392.1 155011115 GGA G

CM070392.1 155040977 T TA

CM070392.1 155056520 TCC T

CM070392.1 155448510 CTATA C

CM070392.1 155810645 C A

CM070392.1 155814008 GGA G

CM070392.1 155999816 C CT

CM070392.1 156736988 CAGAGAGAGAG C

CM070392.1 156862535 A AAC

CM070392.1 156941675 GTA G

CM070392.1 157298219 C G

CM070392.1 158655536 G GTTTT

CM070392.1 158808422 G GTTTTTTTTTT

CM070392.1 158898208 G GGAGA

CM070392.1 159021195 AATAG A

CM070392.1 159174383 C CTTTT

CM070392.1 159479054 A AT

CM070392.1 160376497 ATGTGTG A

CM070392.1 160838297 C T

CM070392.1 160934482 T TGATA

CM070392.1 161119824 CAG C

CM070392.1 161435137 T TC

CM070392.1 161435138 T C

CM070392.1 161631223 CAT C

CM070392.1 161893033 G GGATA

CM070392.1 162775648 CTCT C

CM070392.1 163030276 C CTTTTTTTTTTTTTTTTTTT

CM070392.1 163390909 G GAT

CM070392.1 163449463 GAGA G

CM070392.1 163791545 CT C

CM070392.1 164030263 G GATAT

CM070392.1 164447939 C CGTGT

CM070392.1 166113722 GAGAA G

CM070392.1 166202587 CCTCT C

CM070392.1 166520125 CAGAA C

CM070392.1 166836759 C CCTCTCTCT

CM070392.1 167095233 T TG

CM070392.1 167346691 TGA T

CM070392.1 167442561 G GAC

CM070392.1 167543227 C A

CM070392.1 167947136 TTC T

CM070392.1 168408498 GGAA G

CM070392.1 168751134 GCACA G

CM070392.1 169594458 CTAT C

CM070392.1 170509421 G GATAT

CM070392.1 171144082 GGAAA G

CM070392.1 171348374 G GGTGT

CM070392.1 171403106 ACT A

CM070392.1 171501815 T TTC

CM070392.1 171859621 GAAGA G

CM070392.1 174636424 C CA

CM070392.1 174733577 TC T

CM070392.1 174795203 C CCTCT

CM070392.1 175051684 A G

CM070392.1 175493288 T C

CM070392.1 175822967 TG T

CM070392.1 175912598 G GCCCCCC

CM070392.1 177697802 T TA

CM070392.1 177802520 G GTTTTTTTTTTT

CM070392.1 178038091 G GTTTTTTTTTT

CM070392.1 178768468 TTC T

CM070392.1 179763301 A G

CM070392.1 179872631 T TA

CM070392.1 180230028 GCC G

CM070392.1 180585956 T TTC

CM070392.1 182028984 GTA G

CM070392.1 182031174 G GTTTTTTTT

CM070392.1 182857658 A AAG

CM070392.1 182893266 T TTCTC

CM070392.1 183135920 G A

CM070392.1 183347185 T TA

CM070392.1 183544003 G GATAT

CM070392.1 183557664 G GTA

CM070392.1 183878506 TTC T

CM070392.1 184077524 ATC A

CM070392.1 184130489 CTG C

CM070392.1 185076554 GC G

CM070392.1 185093771 CG C

CM070392.1 185141001 CGGGGGGG C

CM070392.1 185350038 C CAAAAA

CM070392.1 185833931 C CAT

CM070392.1 186555004 CG C

CM070392.1 187759065 CG C

CM070392.1 187868734 GGA G

CM070392.1 187988508 AG A

CM070392.1 188117481 TG T

CM070392.1 189555118 G GTA

CM070392.1 189815924 T TTTG

CM070392.1 191240369 T TTC

CM070392.1 191303083 C CAAAAAA

CM070392.1 193243458 C CTTTT

CM070392.1 193459311 GCT G

CM070392.1 193740702 A ACTT

CM070392.1 194526057 TGC T

CM070392.1 195285019 TTG T

CM070392.1 195290120 A ATATC

CM070392.1 195504911 T TTG

CM070392.1 196148252 C CATAT

CM070392.1 196425681 T TTA

CM070392.1 196789709 AGT A

CM070392.1 196999779 TATAG T

CM070392.1 197233823 A AAT

CM070392.1 197368710 GTAGA G

CM070392.1 197976826 AAG A

CM070392.1 198083928 ATCTC A

CM070392.1 198743246 TC T

CM070392.1 199469917 T TTA

CM070392.1 200636376 GA G

CM070392.1 200705860 ATC A

CM070392.1 200791131 C CATAT

CM070392.1 201197833 T G

CM070392.1 201257278 AAT A

CM070392.1 201803412 A AATCT

CM070392.1 202259225 AAGG A

CM070392.1 202270372 GGAGA G

CM070392.1 202331926 GTAGA G

CM070392.1 202513413 TGATA T

CM070392.1 202518638 A T

CM070392.1 203226434 G GTA

CM070392.1 203596320 G GGA

CM070392.1 204213668 TG T

CM070392.1 204220979 GTATT G

CM070392.1 204439873 TTTC T

CM070392.1 206169004 T TTTC

CM070392.1 206179239 AGT A

CM070392.1 206408833 G GAGA

CM070392.1 206840326 T TGTG

CM070392.1 206891345 GTC G

CM070392.1 207508331 TTC T

CM070392.1 207676674 CATCT C

CM070392.1 208667859 T TTTC

CM070392.1 209016975 CAGAT C

CM070392.1 209083985 CCT C

CM070392.1 209131884 C CTCTT

CM070392.1 209166078 GTCTC G

CM070392.1 212157264 G T

CM070392.1 212211896 G GTTTTTTTTT

CM070392.1 212518030 TTC T

CM070392.1 212537648 CA C

CM070392.1 214443550 CAAG C

CM070392.1 214669860 T C

CM070392.1 214835026 GCT G

CM070392.1 215195300 GGA G

CM070392.1 215354535 TGAGA T

CM070392.1 215519237 T C

CM070392.1 215911167 CATAT C

CM070392.1 216123721 C CAT

CM070392.1 216206099 TTC T

CM070392.1 216216465 TAATA T

CM070392.1 216333827 A AATAT

CM070392.1 216701055 T TAGAC

CM070392.1 217004925 TATAG T

CM070392.1 217456892 TTC T

CM070392.1 217868302 C T

CM070392.1 217988915 G GTATATATATA

CM070392.1 218235161 TTC T

CM070392.1 218340050 GTA G

CM070392.1 218923400 GAAGA G

CM070392.1 218933164 TTC T

CM070392.1 218962324 TA T

CM070392.1 219041434 T TAAGA

CM070392.1 219109733 T TTTCTTC

CM070392.1 219324589 GTTTC G

CM070392.1 219432877 CTTCTTTCT C

CM070392.1 219609646 CCT C

CM070392.1 220080122 TTG T

CM070392.1 220443767 A AAGAAGG

CM070392.1 220479533 C CTTTTT

CM070392.1 220882632 TG T

CM070392.1 221228344 AGG A

CM070392.1 221675749 CGG C

CM070392.1 222035856 CCTT C

CM070392.1 222100603 GGA G

CM070392.1 222262593 AGG A

CM070392.1 222320388 CG C

CM070392.1 222354782 TGG T

CM070392.1 222385120 TTTTA T

CM070392.1 222866520 G GGA

CM070392.1 222868608 TC T

CM070392.1 223035093 TTATC T

CM070392.1 223071889 C CAAAAA

CM070392.1 223231309 C CAAA

CM070392.1 224473043 C CTTTTTTT

CM070392.1 224817346 AAG A

CM070392.1 225014493 AAG A

CM070392.1 225823902 A AAG

CM070392.1 225970890 GAGAA G

CM070392.1 226123899 GC G

CM070392.1 226343623 CG C

CM070392.1 226614958 TTC T

CM070392.1 226840764 CCTT C

CM070392.1 229245669 T TTTTC

CM070392.1 229292173 GCAAA G

CM070392.1 229560110 TCTCCC T

CM070392.1 229746133 TG T

CM070392.1 230077324 T TCTTC

CM070392.1 230148520 G GAGA

CM070392.1 230302198 G T

CM070392.1 230724488 T TTTC

CM070392.1 230794487 A AGTAT

CM070392.1 230866813 G GTCTA

CM070392.1 230925762 T TCA

CM070392.1 231091064 T G

CM070392.1 231504381 G GTTTTTTTT

CM070392.1 232419890 C CAT

CM070392.1 232503852 TTTCTTC T

CM070392.1 232506791 TTTA T

CM070392.1 232826272 CAT C

CM070392.1 232888584 TTA T

CM070392.1 233063305 C T

CM070392.1 233063331 CCTCT C

CM070392.1 233063503 TC T

CM070392.1 233063505 T G

CM070392.1 233250634 A C

CM070392.1 233384153 CTG C

CM070392.1 233610523 C T

CM070392.1 233778585 TC T

CM070392.1 233803720 GAT G

CM070392.1 233858189 CTCTA C

CM070392.1 233972711 C CTCTT

CM070392.1 234933736 T TAATAAATAAATA

CM070392.1 235232402 GGATA G

CM070392.1 235240721 CT C

CM070392.1 235265646 GGA G

CM070392.1 235378636 GTAATA G

CM070392.1 235493362 CCT C

CM070392.1 236039765 AC A

CM070392.1 236991192 G GTA

CM070392.1 237081892 C CAGAT

CM070392.1 237245589 TC T

CM070392.1 237848481 CAGAG C

CM070392.1 238006011 C CA

CM070392.1 238702560 AATTAT A

CM070392.1 239112033 G GATAT

CM070392.1 239888028 GTCTCT G

CM070392.1 240063794 A AAGG

CM070392.1 240253332 GGAA G

CM070392.1 240266599 TC T

CM070392.1 240506081 TGATA T

CM070392.1 241507044 CCT C

CM070392.1 241819324 CCA C

CM070392.1 242159654 GTA G

CM070392.1 242394658 CAT C

CM070392.1 242613446 CCT C

CM070392.1 242832807 A G

CM070392.1 243163986 G GAAGA

CM070392.1 243418118 G T

CM070392.1 244981878 AAG A

CM070392.1 245033481 GTC G

CM070392.1 245923631 G GTTT

CM070392.1 245930961 CAG C

CM070392.1 245991226 C CTTCT

CM070392.1 246084783 TCC T

CM070392.1 248740785 G GA

CM070392.1 249659717 AAGAG A

CM070392.1 249875999 CAG C

CM070392.1 249939739 C CTTTTTTTTTTTTTTTT

CM070392.1 249954466 C CATCT

CM070392.1 251711419 A G

CM070393.1 1063377 GTA G

CM070393.1 1413582 T TAC

CM070393.1 1420911 GGA G

CM070393.1 1579740 GGA G

CM070393.1 2003202 ACG A

CM070393.1 2840361 C CATCT

CM070393.1 3087237 TTC T

CM070393.1 3302819 G GAT

CM070393.1 3941777 ATC A

CM070393.1 3996926 CAG C

CM070393.1 4786026 GGA G

CM070393.1 5371721 A C

CM070393.1 5371726 G C

CM070393.1 5371733 G A

CM070393.1 5990629 G GTA

CM070393.1 6084356 TG T

CM070393.1 6251438 TTC T

CM070393.1 7364713 GGA G

CM070393.1 7886335 T A

CM070393.1 7971190 AG A

CM070393.1 8036586 C CAAAAAAAAAAAAAAAAAAAAAA

CM070393.1 8126248 CAG C

CM070393.1 8263793 CAGAG C

CM070393.1 9355422 GCT G

CM070393.1 9451856 G GTATA

CM070393.1 9751644 CTA C

CM070393.1 9880923 GATAT G

CM070393.1 10008198 C CAT

CM070393.1 10325006 C CAG

CM070393.1 10521969 CT C

CM070393.1 10988919 CCT C

CM070393.1 11096261 TTC T

CM070393.1 11144799 AATGT A

CM070393.1 11773494 G GA

CM070393.1 12326140 C CAAAAAAAAAA

CM070393.1 12400431 T TA

CM070393.1 12524823 C CAT

CM070393.1 12827987 G GA

CM070393.1 13285157 GA G

CM070393.1 13285159 GGA G

CM070393.1 13698630 GGA G

CM070393.1 14140007 CAG C

CM070393.1 14254136 T TTC

CM070393.1 14789393 GTATA G

CM070393.1 14958427 A T

CM070393.1 14958642 A C

CM070393.1 15133089 GGAA G

CM070393.1 15242323 A ACCCTAACCCTAACCCTAACCCTAAC

CM070393.1 15478552 AAG A

CM070393.1 15566143 C CAAAAAAAAAAAAAAAAAAAAAAAAAAAAAAAAAAAAAAAAA

CM070393.1 16239225 CAG C

CM070393.1 16664717 G GGAA

CM070393.1 16849403 C CAT

CM070393.1 17057785 TTCCCTC T

CM070393.1 17825147 AAT A

CM070393.1 17871306 GGA G

CM070393.1 17872177 CAGA C

CM070393.1 18033938 TGA T

CM070393.1 18725490 GGA G

CM070393.1 18795116 T C

CM070393.1 19414134 AAAG A

CM070393.1 19995639 GGA G

CM070393.1 20068459 GTA G

CM070393.1 20552939 G GTA

CM070393.1 21863283 GAT G

CM070393.1 24945474 CAT C

CM070393.1 25660138 C CAT

CM070393.1 25906551 CT C

CM070393.1 25964302 C CAGAGAG

CM070393.1 26757050 C CATATATAT

CM070393.1 27020351 C CTTTTTTTTTTTTTTT

CM070393.1 27641835 GGA G

CM070393.1 28069059 T TGGAA

CM070393.1 29180348 AC A

CM070393.1 30183541 CCTTT C

CM070393.1 30567492 TG T

CM070393.1 30917157 C CA

CM070393.1 31350840 C CAA

CM070393.1 32128436 T A

CM070393.1 33131394 TCA T

CM070393.1 33358744 T TA

CM070393.1 33916893 CCT C

CM070393.1 35917879 GC G

CM070393.1 36024178 ATC A

CM070393.1 36528468 TG T

CM070393.1 37110695 CA C

CM070393.1 37154322 CG C

CM070393.1 37710652 AAG A

CM070393.1 38472587 T TA

CM070393.1 38950375 CGGG C

CM070393.1 39820551 T G

CM070393.1 40133059 A AT

CM070393.1 40963506 T G

CM070393.1 41363276 TTC T

CM070393.1 42279170 TGA T

CM070393.1 42348095 CAAAG C

CM070393.1 42455225 AAGG A

CM070393.1 42916936 C CA

CM070393.1 42993190 T TAGAG

CM070393.1 43422160 G GTTT

CM070393.1 43776885 TTTC T

CM070393.1 43907998 AAG A

CM070393.1 43981886 GTGTA G

CM070393.1 44790532 T TTTC

CM070393.1 45194551 GAAGA G

CM070393.1 45337059 A G

CM070393.1 46078729 CGA C

CM070393.1 46484658 C A

CM070393.1 46510208 GAGA G

CM070393.1 46697401 ATC A

CM070393.1 46900331 CAG C

CM070393.1 46913410 CAT C

CM070393.1 47646502 CCT C

CM070393.1 47981140 GGA G

CM070393.1 48067287 GA G

CM070393.1 48179829 C CATAT

CM070393.1 48212786 AAAGAAAG A

CM070393.1 49346761 T TAAAAA

CM070393.1 49496933 A AAAAG

CM070393.1 49772832 TTC T

CM070393.1 49793203 CAG C

CM070393.1 50572265 GTTA G

CM070393.1 51063441 TC T

CM070393.1 51956510 G GTA

CM070393.1 51965077 T TTATATATA

CM070393.1 52025515 GAAGAAAGA G

CM070393.1 52633773 TCA T

CM070393.1 53252416 C CTTTT

CM070393.1 55782930 CAG C

CM070393.1 56134110 TGA T

CM070393.1 56519632 AAG A

CM070393.1 57286908 CGG C

CM070393.1 57307261 A AAGG

CM070393.1 57735480 CGG C

CM070393.1 59442302 G A

CM070393.1 59896089 G GGAGAGAGAGAGAGA

CM070393.1 61259694 TTC T

CM070393.1 61698327 C CTATA

CM070393.1 61941771 AGAG A

CM070393.1 61979267 GTCTA G

CM070393.1 62055337 GAGA G

CM070393.1 62146115 C CAAAAAAAAAAA

CM070393.1 62231916 CGT C

CM070393.1 62564466 CGA C

CM070393.1 63457154 T TA

CM070393.1 63846635 T TAC

CM070393.1 64498390 TTCTC T

CM070393.1 64546866 A AT

CM070393.1 64608717 G GTTTTTTTTTTTTTT

CM070393.1 64898021 TAGAA T

CM070393.1 65225938 AAG A

CM070393.1 65723798 C CAAAAAAA

CM070393.1 66326881 TTC T

CM070393.1 66410461 CCT C

CM070393.1 66538137 TTC T

CM070393.1 66756859 AAG A

CM070393.1 67433489 GTC G

CM070393.1 67897867 AG A

CM070393.1 68285247 AAAAT A

CM070393.1 68735358 TTC T

CM070393.1 68820660 C CTTTTTT

CM070393.1 69088846 G GTTTT

CM070393.1 70448223 C CATAT

CM070393.1 70472633 C CT

CM070393.1 71395352 C CT

CM070393.1 71396179 CCT C

CM070393.1 72475009 C CAG

CM070393.1 72575647 GGAGA G

CM070393.1 73970712 G GAGA

CM070393.1 74136180 TTCTC T

CM070393.1 74584628 A AGAG

CM070393.1 74756861 AAG A

CM070393.1 75237875 TC T

CM070393.1 75596379 T TTCTC

CM070393.1 75801878 GAGAA G

CM070393.1 75805358 GAC G

CM070393.1 75818304 C CAAAAAAAA

CM070393.1 75853182 A ATCTC

CM070393.1 75920790 CG C

CM070393.1 75924486 C CAAAAAAAAAAAAAA

CM070393.1 76085288 TGC T

CM070393.1 76440338 T TC

CM070393.1 77405199 GAT G

CM070393.1 78551776 G GGGA

CM070393.1 78901135 C CTCTCT

CM070393.1 79262403 TAC T

CM070393.1 79450180 CTCT C

CM070393.1 80949091 C CAA

CM070393.1 81459946 GA G

CM070393.1 81965361 TGC T

CM070393.1 82045751 AC A

CM070393.1 83213335 C CTTTTTTTTTTTTT

CM070393.1 83407661 C CTATT

CM070393.1 84540355 C CAAAAAAAAAAAA

CM070393.1 84606742 G GTTA

CM070393.1 86308334 CGA C

CM070393.1 86851376 TC T

CM070393.1 87714047 GGA G

CM070393.1 87881789 C CCTAT

CM070393.1 87907902 C CTTAT

CM070393.1 89319028 C CTCTT

CM070393.1 89845613 G GGATA

CM070393.1 90412908 C CATCT

CM070393.1 90602700 ACG A

CM070393.1 90691897 CTTCT C

CM070393.1 90807791 G GTTTT

CM070393.1 91079580 TTC T

CM070393.1 91536767 C CCTT

CM070393.1 91750068 T TTATC

CM070393.1 92007671 TAG T

CM070393.1 92379617 C CAAAAAAAAAAAAAAAAAAAAAAAAAAAAAAAAAAAAAAAAAAAAA

CM070393.1 92420602 TTC T

CM070393.1 92612259 GGA G

CM070393.1 92622173 A AAT

CM070393.1 92811196 CCT C

CM070393.1 93989082 A ATATCTATC

CM070393.1 94501348 GGA G

CM070393.1 95024939 CCT C

CM070393.1 95662658 G GCTCT

CM070393.1 96509487 T TGATA

CM070393.1 97274162 GGA G

CM070393.1 97416328 G GTTTTTTTTTTTTTT

CM070393.1 97648941 TACAC T

CM070393.1 97758842 CG C

CM070393.1 98175090 C CTCTT

CM070393.1 99107367 AG A

CM070393.1 99480465 T TTCTC

CM070393.1 99547837 GTC G

CM070393.1 100052793 GAGA G

CM070393.1 101451682 GGA G

CM070393.1 101508469 A AAT

CM070393.1 102455782 GAGAA G

CM070393.1 102943089 C CAT

CM070393.1 103052317 T TA

CM070393.1 103144954 GTCT G

CM070393.1 104258719 GT G

CM070393.1 104403191 C CAAAAA

CM070393.1 105184551 T A

CM070393.1 105251276 AAG A

CM070393.1 105599151 GTA G

CM070393.1 105878934 AAAG A

CM070393.1 105879042 G A

CM070393.1 106045573 G GGAA

CM070393.1 106291791 C CT

CM070393.1 106879488 GTA G

CM070393.1 107991354 CT C

CM070393.1 108307863 A G

CM070393.1 108424886 T TTTA

CM070393.1 108645812 TGC T

CM070393.1 108837608 AAAG A

CM070393.1 108905471 AAAAG A

CM070393.1 109286328 G GT

CM070393.1 109817122 T TA

CM070393.1 110355713 ATC A

CM070393.1 110487015 CG C

CM070393.1 110894525 TC T

CM070393.1 111314796 TGAAA T

CM070393.1 111415869 TCC T

CM070393.1 111711511 T TTATC

CM070393.1 111951205 C CCTTT

CM070393.1 112331685 AAG A

CM070393.1 113032596 CAT C

CM070393.1 113162902 T TTATC

CM070393.1 113617878 T TTC

CM070393.1 113776768 TTC T

CM070393.1 114331976 G GT

CM070393.1 115309204 T TATAC

CM070393.1 115638873 CAG C

CM070393.1 115871168 G GTA

CM070393.1 116798203 TTC T

CM070393.1 117349805 G GGA

CM070393.1 117569151 G GAGAC

CM070393.1 117910386 A T

CM070393.1 119436281 TAC T

CM070393.1 119714127 TC T

CM070393.1 120616063 GTAGA G

CM070393.1 120647440 G GAT

CM070393.1 121485456 AGT A

CM070393.1 121702463 TTTC T

CM070393.1 122611394 AG A

CM070393.1 123682078 T TTATC

CM070393.1 124359128 TCTC T

CM070393.1 125125821 AAT A

CM070393.1 125905694 CAG C

CM070393.1 126164286 TTC T

CM070393.1 126522560 C CAAAAAAAAAAAAAAA

CM070393.1 126604716 G GACAC

CM070393.1 127262886 AAAAG A

CM070393.1 127636596 GTC G

CM070393.1 127694364 TTC T

CM070393.1 128407320 C CATAAT

CM070393.1 128496142 A AG

CM070393.1 129595451 TTCC T

CM070393.1 129618079 CTCTTTCTT C

CM070393.1 130025133 A G

CM070393.1 130350320 GTA G

CM070393.1 130417912 G GTTATTA

CM070393.1 130554127 ATC A

CM070393.1 130652137 A ACTAT

CM070393.1 131243526 T TGAGAGAGAGAGA

CM070393.1 131668281 A AAGAT

CM070393.1 133498087 TTC T

CM070393.1 134127745 A G

CM070393.1 134182195 T TTC

CM070393.1 134422491 TCCCC T

CM070393.1 134591039 T TA

CM070393.1 134875175 G GTATA

CM070393.1 135125453 CTCT C

CM070393.1 135333901 CTAT C

CM070393.1 135620267 GCT G

CM070393.1 135907588 C CTGT

CM070393.1 135974359 GGA G

CM070393.1 136464981 GC G

CM070393.1 136751459 GCCC G

CM070393.1 137320084 G GGATA

CM070393.1 137826988 T TGAAA

CM070393.1 138245795 GCC G

CM070393.1 139590867 CCT C

CM070393.1 140602981 AC A

CM070393.1 141425723 G GTATC

CM070393.1 142074558 C CATAT

CM070393.1 142884587 GGA G

CM070393.1 142935509 G GGAAA

CM070393.1 143146912 A AAGAT

CM070393.1 145008784 G GGA

CM070393.1 145032844 GGA G

CM070393.1 145096291 C T

CM070393.1 145189277 CCTT C

CM070393.1 145353304 CATCT C

CM070393.1 145775972 CCT C

CM070393.1 145943411 C T

CM070393.1 146590434 TCA T

CM070393.1 146593784 TTG T

CM070393.1 146689848 GTCTC G

CM070393.1 146853996 AG A

CM070393.1 147685085 TCTTC T

CM070393.1 148032762 C T

CM070393.1 148046764 TTTTC T

CM070393.1 148465628 TCC T

CM070393.1 149155853 C CCTTT

CM070393.1 149299605 CAT C

CM070393.1 149437337 TGATA T

CM070393.1 149726398 AGAAG A

CM070393.1 150390758 C CAT

CM070393.1 150419196 GGA G

CM070393.1 150473293 GTA G

CM070393.1 151330305 TGC T

CM070393.1 151443068 G C

CM070393.1 151694746 A ATT

CM070393.1 151751986 C CT

CM070393.1 152019688 T TTCCTC

CM070393.1 152790065 GACAT G

CM070393.1 153242162 CAAAGAAAGAAAG C

CM070393.1 153611949 AATAC A

CM070393.1 153724002 A AAAG

CM070393.1 154321231 C T

CM070393.1 154633066 ACT A

CM070393.1 155735899 CAT C

CM070393.1 156237698 GGA G

CM070393.1 157259217 C CTCTT

CM070393.1 157403048 A AATCT

CM070393.1 157543726 AATAT A

CM070393.1 157914153 TTG T

CM070393.1 158034632 G GGA

CM070393.1 158081145 GGA G

CM070393.1 158539816 TTTA T

CM070393.1 158566614 TGC T

CM070393.1 158573993 GAGAGA G

CM070393.1 158685651 GAC G

CM070393.1 158928578 TG T

CM070393.1 159323398 A G

CM070393.1 159443403 T C

CM070393.1 159917366 AG A

CM070393.1 160746546 TTC T

CM070393.1 160785105 CG C

CM070393.1 160948571 C CTTTTTTTT

CM070393.1 161054115 TGC T

CM070393.1 161507398 G T

CM070393.1 161621547 CGGG C

CM070393.1 161841278 TC T

CM070393.1 161979868 A AGT

CM070393.1 162488313 A AAGAT

CM070393.1 163160885 TGATA T

CM070393.1 163286772 T TTATA

CM070393.1 163624200 G GC

CM070393.1 163774979 ATGGTGGTGGTGG A

CM070393.1 163826711 GTGT G

CM070393.1 163898920 TTG T

CM070393.1 164003169 TATATTAAAGGGTCGCA T

CM070393.1 164529145 G GAT

CM070393.1 165108822 TAGGA T

CM070393.1 165191076 C CTTTTTTTTTT

CM070393.1 165406766 CTCTT C

CM070393.1 165564222 GT G

CM070393.1 165819368 TC T

CM070393.1 166256300 G GATAT

CM070393.1 167035709 GAT G

CM070393.1 167354145 TC T

CM070393.1 168389445 TGA T

CM070393.1 168509445 TTCTC T

CM070393.1 168569614 ATG A

CM070393.1 168679041 T TTCC

CM070393.1 168802152 ATG A

CM070393.1 168942423 A AG

CM070393.1 169199984 G GAGA

CM070393.1 169675748 AATAG A

CM070393.1 170265693 G GCT

CM070393.1 170449097 C CATCT

CM070393.1 170528969 CATAT C

CM070393.1 170642716 G GTTTTTTT

CM070393.1 171733998 CCT C

CM070393.1 172645400 TACAC T

CM070393.1 172839592 ACT A

CM070393.1 172848096 C CT

CM070393.1 173294291 GGA G

CM070393.1 173524379 C CTCT

CM070393.1 173873979 C CGGGGGGGGG

CM070393.1 174010295 CA C

CM070393.1 174027556 ACC A

CM070393.1 174215085 TTTTA T

CM070393.1 174921074 G GAGA

CM070393.1 175111652 T TG

CM070393.1 175313703 TTTA T

CM070393.1 175874422 TTC T

CM070393.1 175936382 TTC T

CM070393.1 176396996 CG C

CM070393.1 176425090 GAGA G

CM070393.1 176547427 GTC G

CM070393.1 176591779 G GATATAT

CM070393.1 176927218 CGT C

CM070393.1 177177609 GCT G

CM070393.1 177292977 TG T

CM070393.1 177554834 A G

CM070393.1 177676050 GGA G

CM070393.1 177978574 CAG C

CM070393.1 178006264 ATC A

CM070393.1 178332048 TC T

CM070393.1 179089007 ATTC A

CM070393.1 179897641 G GGAGAA

CM070393.1 180169274 A G

CM070393.1 180912666 A AAGAAGG

CM070393.1 181267547 TTC T

CM070393.1 181267593 C CT

CM070393.1 181342351 G GGAA

CM070393.1 181641472 C CTTTTTTTTTTTTTT

CM070393.1 181785552 A ATT

CM070393.1 182236644 A T

CM070393.1 182274434 G GAAT

CM070393.1 182419761 TG T

CM070393.1 182613244 G GGT

CM070393.1 182983198 GTC G

CM070393.1 183397466 GCT G

CM070393.1 183598512 G GT

CM070393.1 183750591 T TC

CM070393.1 183934240 CCT C

CM070393.1 184168137 T TAAAAA

CM070393.1 186118801 TTCTC T

CM070393.1 186551056 GGA G

CM070393.1 186916935 G GCTT

CM070393.1 186944729 GCT G

CM070393.1 186998108 AGACT A

CM070393.1 187114649 GTAGA G

CM070393.1 187286593 TGG T

CM070393.1 187477062 AAG A

CM070393.1 187518685 C CAAAAAAAAAAAAA

CM070393.1 187888224 C A

CM070393.1 188056698 G GGAA

CM070393.1 188067983 GCT G

CM070393.1 188600549 C CT

CM070393.1 189006672 C CT

JAXUCZ010000023.1 110725 TTA T

JAXUCZ010000023.1 359672 A T

JAXUCZ010000023.1 365093 A ACAC

JAXUCZ010000023.1 623730 TTTC T

JAXUCZ010000023.1 626975 T TA

JAXUCZ010000023.1 1369404 GAGAGA G

JAXUCZ010000023.1 1631400 A AAAG

JAXUCZ010000023.1 2109911 TTC T

JAXUCZ010000024.1 56287 AAG A

JAXUCZ010000024.1 307864 CAG C

JAXUCZ010000024.1 728323 CCT C

JAXUCZ010000025.1 158 TTCTTC T

JAXUCZ010000025.1 255191 CAT C

JAXUCZ010000025.1 676310 CAG C

JAXUCZ010000025.1 681693 GGA G

JAXUCZ010000026.1 181123 GTA G

CM070394.1 641158 G C

CM070394.1 641159 GA G

CM070394.1 641170 A T

CM070394.1 817833 C A

CM070394.1 818064 C A

CM070394.1 903936 G A

CM070394.1 1056058 C A

CM070394.1 1056074 A T

CM070394.1 1592737 A C

CM070394.1 2202139 TTGA T

CM070394.1 2707554 G GGAA

CM070394.1 2735238 CAT C

CM070394.1 2774328 TGAGA T

CM070394.1 2823158 CATAG C

CM070394.1 3044918 TTC T

CM070394.1 3766240 G GTTTT

CM070394.1 3768943 CAGAT C

CM070394.1 4110497 CCT C

CM070394.1 4162532 G GTTTTT

CM070394.1 4521079 G GCT

CM070394.1 4623940 CG C

CM070394.1 5501702 C A

CM070394.1 5578339 C T

CM070394.1 6608704 C CATTT

CM070394.1 6642748 GA G

CM070394.1 6666743 TTC T

CM070394.1 7196612 G GAGA

CM070394.1 7968483 GGA G

CM070394.1 8320785 GGTGT G

CM070394.1 8913661 AAGG A

CM070394.1 8923834 CCT C

CM070394.1 9331514 GGA G

CM070394.1 9391237 T TCAC

CM070394.1 9659727 CG C

CM070394.1 10150554 GAT G

CM070394.1 10263312 TCC T

CM070394.1 10447183 TCCC T

CM070394.1 11133801 A T

CM070394.1 11240588 G C

CM070394.1 11304787 GCA G

CM070394.1 11683577 GC G

CM070394.1 11944560 C CAAAAAAAAAAAAA

CM070394.1 13411009 T TAAAA

CM070394.1 13426728 TTAA T

CM070394.1 14001937 G A

CM070394.1 14376413 CAG C

CM070394.1 14798885 GGA G

CM070394.1 14950550 TC T

CM070394.1 14978506 A AC

CM070394.1 16051486 GGA G

CM070394.1 16754977 GGA G

CM070394.1 17006618 TC T

CM070394.1 17120286 G GCA

CM070394.1 17213648 A AAAAG

CM070394.1 18201742 TTC T

CM070394.1 18265093 CAAT C

CM070394.1 19143010 GTA G

CM070394.1 19335697 C CT

CM070394.1 19437765 G GTA

CM070394.1 22891713 AAG A

CM070394.1 23233710 AAG A

CM070394.1 23362890 GGA G

CM070394.1 23420429 CCT C

CM070394.1 24097957 T TTA

CM070394.1 24340708 G GA

CM070394.1 26492285 CAT C

CM070394.1 26945935 TGA T

CM070394.1 26969050 C CTA

CM070394.1 27099313 A AAGAG

CM070394.1 27578272 GGA G

CM070394.1 27810662 G GAT

CM070394.1 28456753 T C

CM070394.1 29070699 CGG C

CM070394.1 29509477 TTC T

CM070394.1 29832264 CAT C

CM070394.1 30255346 G GTTTTTTT

CM070394.1 30551212 T C

CM070394.1 30771822 C A

CM070394.1 31509070 C CAATA

CM070394.1 31948986 CCCT C

CM070394.1 33447270 CT C

CM070394.1 33728469 A AAC

CM070394.1 35034347 C CCTTT

CM070394.1 35247568 A AATAT

CM070394.1 35431929 C CTCTTCT

CM070394.1 35707907 CGA C

CM070394.1 37471463 G GTATATA

CM070394.1 37999988 TAC T

CM070394.1 38512618 C CT

CM070394.1 38795359 C CTT

CM070394.1 39887741 C T

CM070394.1 40651648 CTAT C

CM070394.1 40859285 CGA C

CM070394.1 41260301 G GATATATAT

CM070394.1 41736390 TCTCC T

CM070394.1 43215899 CAG C

CM070394.1 43787510 C CTATA

CM070394.1 43850250 ATC A

CM070394.1 44999757 CCT C

CM070394.1 45727323 GCT G

CM070394.1 45857412 C CTCTT

CM070394.1 45958715 G GATTT

CM070394.1 46001728 CAG C

CM070394.1 46551366 CCTCT C

CM070394.1 48013020 TG T

CM070394.1 48038534 G GTCTA

CM070394.1 48760010 TGAGA T

CM070394.1 49470835 CGA C

CM070394.1 49795711 AAG A

CM070394.1 50147537 A AAAAT

CM070394.1 51467899 CGT C

CM070394.1 53009646 TA T

CM070394.1 53351168 GTC G

CM070394.1 53379836 C CAT

CM070394.1 53540586 CCCTT C

CM070394.1 55163237 C CTTTTTTT

CM070394.1 55933057 ACT A

CM070394.1 56100823 GA G

CM070394.1 56576009 GAAGA G

CM070394.1 56982513 T TAAAAAAAAAAA

CM070394.1 57326718 CAGAA C

CM070394.1 58187134 CAG C

CM070394.1 58187864 TAC T

CM070394.1 58501875 G GA

CM070394.1 59676336 CA C

CM070394.1 59784036 TTTC T

CM070394.1 59854396 TG T

CM070394.1 59947188 C CAAA

CM070394.1 60373201 GTCTA G

CM070394.1 60440173 A AG

CM070394.1 60599300 C CT

CM070394.1 60958848 A AAGG

CM070394.1 61134932 CGA C

CM070394.1 61219294 C CAT

CM070394.1 61376746 TTC T

CM070394.1 61598927 A ATATC

CM070394.1 62212858 GAGAA G

CM070394.1 62825253 C CA

CM070394.1 63025027 TTC T

CM070394.1 63139358 GCCTC G

CM070394.1 63175413 GAGGA G

CM070394.1 63341997 AAAAG A

CM070394.1 63359613 A ATG

CM070394.1 63592480 AC A

CM070394.1 64550411 CA C

CM070394.1 65361584 TCATC T

CM070394.1 65530738 A ATCTT

CM070394.1 66992210 ATATC A

CM070394.1 67182254 TTC T

CM070394.1 67182358 T C

CM070394.1 67481199 G GAAAAA

CM070394.1 68562927 A ATATG

CM070394.1 68624718 C CAG

CM070394.1 68702897 TTC T

CM070394.1 68858441 C T

CM070394.1 69323067 T TTG

CM070394.1 69335940 CTTCT C

CM070394.1 70277406 TTC T

CM070394.1 70378484 A ACTATCTAT

CM070394.1 71591003 CAG C

CM070394.1 71899809 CAG C

CM070394.1 72423875 CCTTT C

CM070394.1 73188899 GGA G

CM070394.1 73486808 CAG C

CM070394.1 73752816 TTC T

CM070394.1 74372175 ATAT A

CM070394.1 76496950 A G

CM070394.1 77513113 CG C

CM070394.1 77820065 G GA

CM070394.1 78319868 CG C

CM070394.1 78438044 TAAG T

CM070394.1 79085129 CAG C

CM070394.1 79328093 AAGAT A

CM070394.1 79745716 TC T

CM070394.1 79782105 G GTTTTTTTTT

CM070394.1 80044749 GGA G

CM070394.1 80697884 C CA

CM070394.1 81246288 A ACTTCTTCTTCTTCTTCTTCTTCTTCTT

CM070394.1 81576753 TTTC T

CM070394.1 81961018 AC A

CM070394.1 82023820 CATCT C

CM070394.1 82651931 ATC A

CM070394.1 82655684 ATC A

CM070394.1 82691435 C CGGGGGGGGGGGGGGGGGGGGGGGG

CM070394.1 82691438 C G

CM070394.1 82691441 C G

CM070394.1 82691444 C G

CM070394.1 82691447 C G

CM070394.1 83446447 C CAAAA

CM070394.1 83870061 TTCTC T

CM070394.1 83919855 A AAGG

CM070394.1 85306100 AC A

CM070394.1 85543077 TC T

CM070394.1 85595452 CCT C

CM070394.1 85603249 T TTTA

CM070394.1 86031295 A AG

CM070394.1 86086702 C CAAAAAAAAAAAAAAAAAAAAAAAAAAAAA

CM070394.1 86108186 TGA T

CM070394.1 86127190 CTCTA C

CM070394.1 86302032 GCT G

CM070394.1 86479384 TTC T

CM070394.1 86610122 CTATT C

CM070394.1 87906858 GGA G

CM070394.1 88355262 TTTA T

CM070394.1 88652786 TA T

CM070394.1 88944098 CACAT C

CM070394.1 89305703 AC A

CM070394.1 90145806 TAC T

CM070394.1 90148793 C CTTTTTTTTTTTTTTTT

CM070394.1 90588090 C A

CM070394.1 90951144 G GTTTTTTTTTTTTTTTTTT

CM070394.1 91276899 T TTA

CM070394.1 91947920 GATAT G

CM070394.1 93043326 G GTCTTCT

CM070394.1 93814206 A ATCCT

CM070394.1 95220238 T TA

CM070394.1 95496050 T C

CM070394.1 96083477 TTC T

CM070394.1 96659708 CCTT C

CM070394.1 96803637 A ACT

CM070394.1 98070499 CATCT C

CM070394.1 98308913 TTATA T

CM070394.1 99529388 T TAAAAAAAAAAAA

CM070394.1 100098313 C T

CM070394.1 100141860 T TTA

CM070394.1 100490635 GGA G

CM070394.1 100728364 GA G

CM070394.1 100953757 T C

CM070394.1 101019236 TTC T

CM070394.1 101112524 T A

CM070394.1 101468311 T TTTC

CM070394.1 101721487 G GTA

CM070394.1 102176783 AATAG A

CM070394.1 103415862 AGAG A

CM070394.1 103574690 T C

CM070394.1 104544233 AG A

CM070394.1 105046538 TAC T

CM070394.1 105935304 GT G

CM070394.1 106230262 ATG A

CM070394.1 106912635 T TTC

CM070394.1 107755431 CTCT C

CM070394.1 107964021 GAT G

CM070394.1 108389588 A AT

CM070394.1 108839247 GAT G

CM070394.1 109137513 G GT

CM070394.1 109435124 G GGAA

CM070394.1 110127900 G GTTTTTTTTTTTTTTTTTTTTTT

CM070394.1 110200907 T TC

CM070394.1 110399134 ACT A

CM070394.1 110524829 TTCTC T

CM070394.1 111263215 GGA G

CM070394.1 111263484 GGA G

CM070394.1 111646602 C CCA

CM070394.1 111708495 G GGAGA

CM070394.1 112226486 CCT C

CM070394.1 112537496 G GAGA

CM070394.1 113524232 TGA T

CM070394.1 113777534 G GTTTTTTTTTTTTTTTTTTTTTTTTT

CM070394.1 114243492 GTC G

CM070394.1 114431655 AAAT A

CM070394.1 114950975 T G

CM070394.1 115486674 TTC T

CM070394.1 115573060 T TATAC

CM070394.1 115772154 A AAGAT

CM070394.1 116330647 C CTT

CM070394.1 117739895 AAAAG A

CM070394.1 118467073 AAAAT A

CM070394.1 119331170 GGT G

CM070394.1 119515526 CA C

CM070394.1 119525891 GAAA G

CM070394.1 120139824 TGA T

CM070394.1 120326849 GA G

CM070394.1 120821388 G GTATAGAATATAGAA

CM070394.1 121334572 GCA G

CM070394.1 121597296 G GA

CM070394.1 121831382 CCT C

CM070394.1 122062292 C CA

CM070394.1 122149916 T C

CM070394.1 122181298 CAG C

CM070394.1 122360155 C CTTT

CM070394.1 123150769 G A

CM070394.1 123150775 G A

CM070394.1 123613891 TGAGAGA T

CM070394.1 124481830 GGGAGA G

CM070394.1 124496497 T TGGAA

CM070394.1 124921015 G GTC

CM070394.1 125346833 CCA C

CM070394.1 125755333 GCTTT G

CM070394.1 126747131 C CAAAAAAAAAAAAAAA

CM070394.1 127148796 TA T

CM070394.1 127260084 TAG T

CM070394.1 127745055 CTCT C

CM070394.1 128164535 TTC T

CM070394.1 128503811 G GCA

CM070394.1 128510705 ATCT A

CM070394.1 129592534 C CTAA

CM070394.1 130295383 GGA G

CM070394.1 130878060 G GTTTTTTTTTT

CM070394.1 130884619 A AACAC

CM070394.1 131482136 TG T

CM070394.1 132175025 T TAGA

CM070394.1 132792524 T TGATA

CM070394.1 133087810 G GAAGA

CM070394.1 133100324 T TGATA

CM070394.1 134095561 C CTTTTTTTTTTTTT

CM070394.1 134538090 T TTTTC

CM070394.1 134865174 CCCT C

CM070394.1 134865257 CTCT C

CM070394.1 135054934 CGA C

CM070394.1 135317668 CATCT C

CM070394.1 135473507 C CCTT

CM070394.1 135709263 GC G

CM070394.1 136397052 G GGAGA

CM070394.1 136793244 CACAG C

CM070394.1 137128593 CAG C

CM070394.1 137444750 C CTCTT

CM070394.1 138160059 AAG A

CM070394.1 138560275 CT C

CM070394.1 139234903 C CTA

CM070394.1 139699446 GCT G

CM070394.1 140035527 C CT

CM070394.1 140263247 T TTGTGTG

CM070394.1 141011508 GAGAA G

CM070394.1 141039521 T C

CM070394.1 141226192 G GAAAAAAA

CM070394.1 141810484 GGA G

CM070394.1 142205540 AGATG A

CM070394.1 142258308 G GGATA

CM070394.1 142793972 AAC A

CM070394.1 142923637 GC G

CM070394.1 143301235 C CT

CM070394.1 143972822 G GTA

CM070394.1 144609583 T TTC

CM070394.1 144643640 C CAT

CM070394.1 144682818 GTA G

CM070394.1 145044228 CCCT C

CM070394.1 146718811 GAAGA G

CM070394.1 147004256 AGATG A

CM070394.1 147800443 C CA

CM070394.1 147995269 A AAAAG

CM070394.1 148061324 G GTTTTTTTTTTTTTTTTTTTTTTTTTTT

CM070394.1 148098861 C CAAAA

CM070394.1 148129264 TC T

CM070394.1 148560444 TGA T

CM070394.1 149281722 G A

CM070394.1 149321178 A C

CM070394.1 149352515 G T

CM070394.1 149352873 G T

CM070394.1 149352880 A C

CM070394.1 149357780 G T

CM070394.1 149357783 T C

CM070394.1 149357824 G GA

CM070394.1 149359951 G T

CM070394.1 149359954 T C

CM070394.1 149783465 TAC T

CM070394.1 150258681 TCA T

CM070394.1 150292573 TA T

CM070394.1 151515165 TTATA T

CM070394.1 151944868 GGA G

CM070394.1 151982770 A G

CM070394.1 152646190 CG C

CM070394.1 153222238 GCA G

CM070394.1 154440966 TTC T

CM070394.1 154483369 C CTATA

CM070394.1 154491697 CGAGA C

CM070394.1 154880780 CA C

CM070394.1 154999117 GGAAA G

CM070394.1 155504588 CTT C

CM070394.1 155574106 CA C

CM070394.1 155584961 C CTTTTTTT

CM070394.1 156009845 GT G

CM070394.1 156153368 AC A

CM070394.1 158104130 C CATATATATATATATATATATAT

CM070394.1 159383031 TC T

CM070394.1 159557570 G GTTTTTTTTTTTTTTTTTTT

CM070394.1 159995430 TTC T

CM070394.1 160156036 GTATC G

CM070394.1 162085972 CACAT C

CM070394.1 163123861 AAAAG A

CM070394.1 163127346 T TC

CM070394.1 163235754 CAAGA C

CM070394.1 164069977 G GAC

CM070394.1 164073200 T TTTC

CM070394.1 164183779 CCTTT C

CM070394.1 164600682 ATC A

CM070394.1 164739255 C CAT

CM070394.1 165372946 AAG A

CM070394.1 166794611 GA G

CM070394.1 166850443 GTATATA G

CM070394.1 167908868 CCT C

CM070394.1 168068588 C CTTT

CM070394.1 168171297 AAG A

CM070394.1 169143714 GGA G

CM070394.1 169161733 C CCTAT

CM070394.1 169497439 CTCTT C

CM070394.1 170378111 TTC T

CM070394.1 170725404 G GAAGGA

CM070394.1 170954922 T TGATA

CM070394.1 170966805 GC G

CM070394.1 171234548 C CATCT

CM070394.1 171343527 GGAGA G

CM070394.1 171580461 AC A

CM070394.1 171759942 ATCTCTC A

CM070394.1 171999526 GGA G

CM070394.1 172141361 TGGTGGAGGTGGAGGTGGAGGTGGTGGAGGTGGA T

CM070394.1 172789194 AAG A

CM070394.1 172945142 AAG A

CM070394.1 173025263 GCT G

CM070394.1 173036964 TGA T

CM070394.1 174130152 GAGA G

CM070394.1 174284586 GCA G

CM070394.1 174284781 A ACTCTCTCT

CM070394.1 174852586 T TGATA

CM070394.1 175590354 G GTTTTTTTTTT

CM070394.1 176029165 GGA G

CM070394.1 176625097 G GGATA

CM070394.1 177185512 CGG C

CM070394.1 177434246 ACG A

CM070394.1 178114579 A ATAT

CM070394.1 178593116 C CAAAAAAAAA

CM070394.1 178839201 GA G

CM070394.1 178869145 GAAGA G

CM070394.1 179548132 CCT C

CM070394.1 180385095 TTA T

CM070394.1 181576681 G GTTTT

CM070394.1 181718454 A AT

CM070394.1 181737495 C CTTCT

CM070394.1 181954099 A AAT

CM070394.1 182025809 TGA T

CM070394.1 182116980 ATC A

CM070394.1 182821874 ACT A

CM070394.1 184024913 GAA G

CM070394.1 184024948 A G

CM070395.1 129317 C A

CM070395.1 129401 G T

CM070395.1 129998 C T

CM070395.1 130003 G T

CM070395.1 130013 G A

CM070395.1 185771 T A

CM070395.1 185772 T A

CM070395.1 186142 T G

CM070395.1 186516 G C

CM070395.1 314538 T G

CM070395.1 758369 T G

CM070395.1 924179 T C

CM070395.1 1304263 T C

CM070395.1 1955944 G T

CM070395.1 2758999 A G

CM070395.1 3001475 T G

CM070395.1 3146602 G C

CM070395.1 3214919 G T

CM070395.1 3241005 C A

CM070395.1 4252266 T A

CM070395.1 4460756 C CTAT

CM070395.1 4565053 GGT G

CM070395.1 4679721 C CTCT

CM070395.1 5079088 G A

CM070395.1 5982688 C CAATA

CM070395.1 6157752 T TTCTC

CM070395.1 6929835 G GTA

CM070395.1 7198768 T TC

CM070395.1 7289643 CAG C

CM070395.1 7386983 T TTA

CM070395.1 7927077 A ATATT

CM070395.1 8445667 CAG C

CM070395.1 8509127 C CAGAG

CM070395.1 8571094 GAGA G

CM070395.1 9706282 T C

CM070395.1 10167195 GC G

CM070395.1 10243870 C CATATAT

CM070395.1 11973139 TTCTC T

CM070395.1 12192060 GTA G

CM070395.1 13109402 C CT

CM070395.1 13503173 C CGAAA

CM070395.1 13757609 TCC T

CM070395.1 14556391 G GTCT

CM070395.1 14814630 CATCT C

CM070395.1 15963832 A AATAT

CM070395.1 16210979 C CTA

CM070395.1 16263847 ACATGTTGGGGTTGC A

CM070395.1 16445681 CCT C

CM070395.1 16737052 A AG

CM070395.1 17825503 GGAGAGA G

CM070395.1 17894480 TTC T

CM070395.1 18745753 T TTA

CM070395.1 18747532 T TATA

CM070395.1 18833105 A G

CM070395.1 19045938 G GTAGA

CM070395.1 19504624 T TTCTCTC

CM070395.1 19857476 TTATC T

CM070395.1 21045038 TGA T

CM070395.1 21130852 GA G

CM070395.1 21553232 TG T

CM070395.1 21561953 CCTCT C

CM070395.1 22888369 CAG C

CM070395.1 23247622 C CTATA

CM070395.1 23279286 TTC T

CM070395.1 23281982 TTC T

CM070395.1 23337548 GAAGA G

CM070395.1 23852247 TTG T

CM070395.1 23907279 T TTGGA

CM070395.1 25486475 A G

CM070395.1 25749495 CCTCT C

CM070395.1 25944272 T TAAAA

CM070395.1 26318921 CATAG C

CM070395.1 26720095 CCTTT C

CM070395.1 26911404 AAG A

CM070395.1 26912322 AAC A

CM070395.1 27203090 CTG C

CM070395.1 27204427 GGA G

CM070395.1 28008815 C CA

CM070395.1 28418299 CCT C

CM070395.1 29414441 CTA C

CM070395.1 29768648 TG T

CM070395.1 29834987 G GT

CM070395.1 30074564 G GAC

CM070395.1 30282928 TC T

CM070395.1 30609689 CGG C

CM070395.1 30788965 ACT A

CM070395.1 31383069 TTG T

CM070395.1 31455722 A AAGAGAGAGAGAGAGAGAAAGAGAGAGAGAGAAAGAGAGAGAGAGAGAAAGAAAGAGAGAGAGAGAAAGAGAGAGAGAGAGAGAGAGAAAG

CM070395.1 31455786 G A

CM070395.1 31455807 AG A

CM070395.1 31455829 AGAGAG A

CM070395.1 31573321 ATC A

CM070395.1 31903551 G GGATA

CM070395.1 32534926 CG C

CM070395.1 33240995 GAGA G

CM070395.1 33421088 C CTTTTTTTTTTTT

CM070395.1 33473610 C CCAAA

CM070395.1 34719747 C T

CM070395.1 37063081 ATC A

CM070395.1 37405686 G GAGAA

CM070395.1 39054080 T G

CM070395.1 39054083 C A

CM070395.1 40555140 AATCT A

CM070395.1 40754089 C CATATAT

CM070395.1 41246209 A T

CM070395.1 41246222 AGAG A

CM070395.1 41721278 AAG A

CM070395.1 41907528 TTTC T

CM070395.1 42501463 C CA

CM070395.1 43072196 T TCTTC

CM070395.1 43327718 CCT C

CM070395.1 45961623 CCTT C

CM070395.1 46229837 AAT A

CM070395.1 46641321 TTTC T

CM070395.1 48071119 GGA G

CM070395.1 48113913 AC A

CM070395.1 48870437 CAT C

CM070395.1 49933164 TTC T

CM070395.1 50380196 G GAT

CM070395.1 50470034 CAG C

CM070395.1 51187715 G GTTTTTTTTTTTTTTTTTTTT

CM070395.1 51237955 ACC A

CM070395.1 51559527 CCT C

CM070395.1 51657909 TG T

CM070395.1 52242999 C CAAAAAAAAAAAAAA

CM070395.1 53124628 CT C

CM070395.1 53364389 AG A

CM070395.1 53365723 TAG T

CM070395.1 53871605 C CAAAAAAAAAAAAA

CM070395.1 55998949 CTTCT C

CM070395.1 56061767 TTC T

CM070395.1 56349561 A AGT

CM070395.1 57606126 TTCTC T

CM070395.1 57783755 G GAAA

CM070395.1 60139233 CAGAA C

CM070395.1 60348348 G GTATA

CM070395.1 60513419 GTAGA G

CM070395.1 60519022 TGA T

CM070395.1 60629289 CCT C

CM070395.1 60751451 TC T

CM070395.1 60923474 CT C

CM070395.1 61683420 C CA

CM070395.1 62643093 T TTTTC

CM070395.1 62672933 T TTA

CM070395.1 62672980 G T

CM070395.1 63010972 CG C

CM070395.1 63012259 AGG A

CM070395.1 63290182 GTC G

CM070395.1 63294384 CA C

CM070395.1 64035063 TGA T

CM070395.1 64179338 AAT A

CM070395.1 64345420 C CT

CM070395.1 64571987 CG C

CM070395.1 64705647 C CAAAAAAAAAAAAA

CM070395.1 64751928 CTG C

CM070395.1 65123818 TGC T

CM070395.1 65494979 C CA

CM070395.1 65546170 C CT

CM070395.1 66660046 C CTTTTTTTTTTTTTTTT

CM070395.1 68718604 T TGATA

CM070395.1 69017619 A AAGAG

CM070395.1 69396671 TTC T

CM070395.1 70134426 GGA G

CM070395.1 70319173 T TAAA

CM070395.1 70584668 ATC A

CM070395.1 70692536 GAAGA G

CM070395.1 70773678 GA G

CM070395.1 70773680 GA G

CM070395.1 71230299 T TAAAA

CM070395.1 71730223 TTTA T

CM070395.1 71814034 A C

CM070395.1 71916421 GGTGT G

CM070395.1 72081586 G GGAGA

CM070395.1 72484302 G GAAAA

CM070395.1 73357898 GC G

CM070395.1 73487896 A AAAACC

CM070395.1 73597663 CG C

CM070395.1 74051487 CCTT C

CM070395.1 74195337 CAGAG C

CM070395.1 74614401 GGA G

CM070395.1 74907435 TC T

CM070395.1 75518574 TAC T

CM070395.1 75561242 TGAGA T

CM070395.1 75888013 G T

CM070395.1 75945120 AAG A

CM070395.1 76358933 AGAG A

CM070395.1 76696360 TGA T

CM070395.1 76737128 TG T

CM070395.1 76808050 T TTCC

CM070395.1 77395048 TC T

CM070395.1 77627359 TTTC T

CM070395.1 78118238 C CAAAAAA

CM070395.1 78596565 CG C

CM070395.1 78821051 TG T

CM070395.1 78947066 C CACAT

CM070395.1 79486247 CTTT C

CM070395.1 79699025 C T

CM070395.1 80523762 TGAGAGAGA T

CM070395.1 81033575 C CCTT

CM070395.1 81198489 C CTTTTTTTTTTT

CM070395.1 81744392 G GTCC

CM070395.1 82094217 CCTTT C

CM070395.1 82233144 GGA G

CM070395.1 82564094 C CGA

CM070395.1 83004183 TAC T

CM070395.1 83822815 GAGA G

CM070395.1 84563136 CGT C

CM070395.1 85046501 GGA G

CM070395.1 85131688 GGA G

CM070395.1 85807687 C CT

CM070395.1 86272756 TC T

CM070395.1 86320685 GGA G

CM070395.1 86468943 AAGG A

CM070395.1 86815203 TTTC T

CM070395.1 87009877 CTTAT C

CM070395.1 87063964 TTC T

CM070395.1 87230580 T TATAG

CM070395.1 87842702 CAAGA C

CM070395.1 90002677 A AAT

CM070395.1 90002957 C CATAT

CM070395.1 90763230 GGAAA G

CM070395.1 90870838 GTA G

CM070395.1 91329849 CAG C

CM070395.1 91664319 CAT C

CM070395.1 91699446 G T

CM070395.1 91699448 G T

CM070395.1 92642244 T TGATA

CM070395.1 93220571 C A

CM070395.1 93531920 G GTTTTTTTTTTTTTT

CM070395.1 93674820 A AC

CM070395.1 93713498 G A

CM070395.1 94347393 C CTCTT

CM070395.1 94467683 TTC T

CM070395.1 94546626 GGATA G

CM070395.1 94791409 AT A

CM070395.1 95312237 T TTATC

CM070395.1 95792542 C CCTT

CM070395.1 96046052 G GGA

CM070395.1 96151748 GTA G

CM070395.1 96223834 AAG A

CM070395.1 96295976 GGAAGAAGAA G

CM070395.1 96465454 CGA C

CM070395.1 96575128 TGATA T

CM070395.1 96607219 G GA

CM070395.1 97026199 TTC T

CM070395.1 97430204 G GAT

CM070395.1 98197913 C CTCTT

CM070395.1 98396620 TTC T

CM070395.1 98848663 GTA G

CM070395.1 99531456 CTCT C

CM070395.1 99765229 A C

CM070395.1 99926791 TAAG T

CM070395.1 100386842 TTC T

CM070395.1 100566747 G GTA

CM070395.1 101117432 T TTC

CM070395.1 102082778 TGC T

CM070395.1 102130464 C A

CM070395.1 102379006 C CAAAT

CM070395.1 102737230 C T

CM070395.1 102845157 T TTTCTTC

CM070395.1 102955309 TCC T

CM070395.1 103009815 T TTATC

CM070395.1 103293732 GATA G

CM070395.1 103398337 G GGAGA

CM070395.1 103434422 A AAGAG

CM070395.1 103979745 AC A

CM070395.1 104142912 CCTAT C

CM070395.1 104278257 TTATC T

CM070395.1 104358827 TAC T

CM070395.1 104728123 GA G

CM070395.1 104765944 GGA G

CM070395.1 104788318 TTTCC T

CM070395.1 105086299 CA C

CM070395.1 105352705 GAGA G

CM070395.1 105450581 GAGAT G

CM070395.1 105651179 AT A

CM070395.1 106026196 G C

CM070395.1 106026197 C T

CM070395.1 106026451 C G

CM070395.1 106132360 A AAGG

CM070395.1 106187509 A AGAAG

CM070395.1 106308496 GGA G

CM070395.1 106482507 C CAT

CM070395.1 106559230 CTCTT C

CM070395.1 106740070 CTCTA C

CM070395.1 106821459 T TTGTG

CM070395.1 106911273 GATAT G

CM070395.1 107126708 C CT

CM070395.1 107292577 ATGTG A

CM070395.1 107693357 TC T

CM070395.1 107696156 C CT

CM070395.1 108244284 TC T

CM070395.1 108314128 CCT C

CM070395.1 108461764 GGAAGAAGAA G

CM070395.1 108624432 CAG C

CM070395.1 108868861 GAGGA G

CM070395.1 109101097 TCC T

CM070395.1 109224617 C CTCTT

CM070395.1 109270973 AATAT A

CM070395.1 109584450 CAT C

CM070395.1 109654844 TTCTCTC T

CM070395.1 109764381 CAG C

CM070395.1 109907805 CATCT C

CM070395.1 110883761 T TAAA

CM070395.1 111223712 GA G

CM070395.1 112039626 TTC T

CM070395.1 112081238 C CAT

CM070395.1 112085470 GGA G

CM070395.1 112434809 AAT A

CM070395.1 112526137 TTTA T

CM070395.1 114351361 GAC G

CM070395.1 114421464 CAG C

CM070395.1 114539328 G GTTTTTTTTT

CM070395.1 115068996 T C

CM070395.1 115241077 A G

CM070395.1 115524570 ATG A

CM070395.1 115940795 TTTC T

CM070395.1 116205526 G GTT

CM070395.1 116250457 AG A

CM070395.1 116571751 C CAAAAAAAAAAAAAAAAAAAA

CM070395.1 116779957 T G

CM070395.1 117343360 GCA G

CM070395.1 117459938 AATAG A

CM070395.1 117668850 AAC A

CM070395.1 117729835 CGT C

CM070395.1 118483005 TC T

CM070395.1 118489768 GGATAGATA G

CM070395.1 118848354 GGA G

CM070395.1 118862440 AT A

CM070395.1 119278950 GAGAT G

CM070395.1 119379513 CAG C

CM070395.1 119677495 TG T

CM070395.1 120168277 T TTCTC

CM070395.1 120443323 TC T

CM070395.1 120500757 CTG C

CM070395.1 121254536 GGA G

CM070395.1 121359126 TGATA T

CM070395.1 121694353 C CATGT

CM070395.1 122437666 GC G

CM070395.1 122585119 T TTAGA

CM070395.1 122615779 T C

CM070395.1 122643076 ATC A

CM070395.1 123433311 G GTCTA

CM070395.1 123510900 CCT C

CM070395.1 123893044 GTCTC G

CM070395.1 124267127 ATGTGTGTGTGTG A

CM070395.1 124738393 CCT C

CM070395.1 124771556 CGA C

CM070395.1 125722912 AAG A

CM070395.1 126508369 C CAT

CM070395.1 126630226 AGGAGG A

CM070395.1 127764688 TCA T

CM070395.1 128073422 G GAT

CM070395.1 128439558 C CT

CM070395.1 128478357 G GTCTA

CM070395.1 128700467 CCT C

CM070395.1 129192091 AAGAT A

CM070395.1 129272525 T TAC

CM070395.1 129493736 T G

CM070395.1 130558826 CAT C

CM070395.1 130603468 GTCTA G

CM070395.1 130731645 G GTTTTT

CM070395.1 131110721 TTCTCTC T

CM070395.1 131129270 G GTTTT

CM070395.1 131397064 CA C

CM070395.1 131739713 G GATAT

CM070395.1 132176712 GAT G

CM070395.1 132187812 C T

CM070395.1 132629609 C CAT

CM070395.1 133701056 AAG A

CM070395.1 134418441 TTC T

CM070395.1 134550508 T TGATG

CM070395.1 134679211 GGA G

CM070395.1 135741669 C CTTTTTTTTTTTTTTT

CM070395.1 135788632 AC A

CM070395.1 136742438 G GC

CM070395.1 136816199 A AC

CM070395.1 137877808 G A

CM070395.1 137971915 C CAAAAAA

CM070395.1 138364664 TGAAA T

CM070395.1 138406514 C CTTTTTTTTTTTTTT

CM070395.1 138645873 GCTT G

CM070395.1 139965645 A AC

CM070395.1 140073354 AC A

CM070395.1 140456797 T TTCTCTC

CM070395.1 140648424 C CT

CM070395.1 140999741 AAAGG A

CM070395.1 141201801 A AAGAG

CM070395.1 141334467 CGA C

CM070395.1 141427487 GCCTT G

CM070395.1 141608309 C CAAAAAAAAAAAAAAAAAAAAAAAA

CM070395.1 141616368 G GA

CM070395.1 141808494 CAG C

CM070395.1 142283256 CG C

CM070395.1 142878653 TTTCC T

CM070395.1 142973791 G GCT

CM070395.1 143085413 ATC A

CM070395.1 143533395 GAGA G

CM070395.1 143569908 T TAAAAAAAAAA

CM070395.1 143583853 AC A

CM070395.1 144244775 A ATAT

CM070395.1 144599592 G GCCCCCCCCCC

CM070395.1 144655439 G GAAAAA

CM070395.1 144809792 CCT C

CM070395.1 144885717 TC T

CM070395.1 144927437 TTC T

CM070395.1 145978901 G GTTTTT

CM070395.1 146011831 GGGGA G

CM070395.1 146013974 CCTT C

CM070395.1 146031528 CG C

CM070395.1 146427816 GC G

CM070395.1 146588359 T TTCTC

CM070395.1 147498547 ATC A

CM070395.1 147504889 CCTCT C

CM070395.1 147620816 CTCT C

CM070395.1 147795544 AC A

CM070395.1 147876657 CG C

CM070395.1 148202733 GCTTC G

CM070395.1 148509846 TTCTA T

CM070395.1 148699522 TCTC T

CM070395.1 149380373 CG C

CM070395.1 149598011 G GGAA

CM070395.1 149976182 GCA G

CM070395.1 150022037 TC T

CM070395.1 150139054 GT G

CM070395.1 150598798 TG T

CM070395.1 150774468 C CAAAAAAAAAAAA

CM070395.1 150853717 CCTT C

CM070395.1 151127426 CG C

CM070395.1 151154163 CG C

CM070395.1 151274511 G GGAAA

CM070395.1 151286205 C CTCTT

CM070395.1 151463942 C CATCT

CM070395.1 151696019 CG C

CM070395.1 152095660 CCACA C

CM070395.1 152220700 CG C

CM070395.1 152454123 C CT

CM070395.1 153229123 TTC T

CM070395.1 153576843 TGC T

CM070395.1 153884466 AGT A

CM070395.1 154377340 CCT C

CM070395.1 154658904 C CATCT

CM070395.1 155339260 CCTTT C

CM070395.1 155907213 C CTAGA

CM070395.1 155922151 C CAAAAAAAAAAAA

CM070395.1 156089694 A AAC

CM070395.1 156459728 ACC A

CM070395.1 156725441 CTTCT C

CM070395.1 157044187 C CAT

CM070395.1 157212046 TTATG T

CM070395.1 157269766 TTTC T

CM070395.1 157413038 TC T

CM070395.1 157419835 TCATC T

CM070395.1 157428450 G GATCT

CM070395.1 157889093 TTC T

CM070395.1 157905254 G GGT

CM070395.1 158044032 TGATA T

CM070395.1 159205218 C CT

CM070395.1 159509192 CTCT C

CM070395.1 160140512 C CTCTA

CM070395.1 160268944 TC T

CM070395.1 160374797 CCT C

CM070395.1 160457469 GAGAA G

CM070395.1 160895025 AC A

CM070395.1 160971859 G GTA

CM070395.1 161032964 G A

CM070395.1 161830434 C CATCT

CM070395.1 162350403 CG C

CM070395.1 162686523 CCTTT C

CM070395.1 163255846 G GAGAT

CM070395.1 163806851 TTTC T

CM070395.1 163950917 ATG A

CM070395.1 164080429 T TG

CM070395.1 164353946 C CTTTTTTTTTTTT

CM070395.1 164943248 C CATT

CM070395.1 165155300 C CTTTTTTTTTTTTT

CM070395.1 165167700 AAAT A

CM070395.1 165286502 G A

CM070395.1 165333150 C CCTAT

CM070395.1 165421682 CA C

CM070395.1 165717265 C CT

CM070395.1 165777402 CG C

CM070395.1 165778753 GCTCT G

CM070395.1 165887704 A AC

CM070395.1 166055911 TG T

CM070395.1 166114969 G A

CM070395.1 166167504 GCCC G

CM070395.1 166333513 C CTTTTTTTTTTTTTTTTTTTTTTTTTT

CM070395.1 166470025 CCT C

CM070395.1 166533469 C CAGAAGA

CM070395.1 167263570 ACG A

CM070395.1 167401988 TGA T

CM070395.1 167741338 T C

CM070395.1 168187928 C CTTTTTTTTTTTTT

CM070395.1 168276601 C CA

CM070395.1 169179632 CG C

CM070395.1 169321605 CCT C

CM070395.1 169356312 TC T

CM070395.1 169438914 ATC A

CM070395.1 169474551 TTC T

CM070395.1 170447909 C CAA

CM070395.1 172190262 TC T

CM070396.1 181076 A T

CM070396.1 258956 A T

CM070396.1 258965 G T

CM070396.1 790178 A C

CM070396.1 1191694 C A

CM070396.1 1191698 G C

CM070396.1 1313148 G T

CM070396.1 1313216 T G

CM070396.1 1350151 A T

CM070396.1 1422681 C T

CM070396.1 1422690 G A

CM070396.1 1450683 A T

CM070396.1 1453003 T G

CM070396.1 1453005 A T

CM070396.1 1453008 A T

CM070396.1 1453009 A G

CM070396.1 1453011 A G

CM070396.1 1629559 T A

CM070396.1 1863181 T A

CM070396.1 1863243 A G

CM070396.1 2003027 C T

CM070396.1 2022929 C G

CM070396.1 2450136 G A

CM070396.1 2454423 T G

CM070396.1 2454578 C G

CM070396.1 2455224 A C

CM070396.1 2518773 G A

CM070396.1 2519399 A G

CM070396.1 2541323 G T

CM070396.1 2588385 A G

CM070396.1 2588483 G A

CM070396.1 2588899 A T

CM070396.1 2589314 G T

CM070396.1 2589416 A AT

CM070396.1 3176369 A G

CM070396.1 3176384 G C

CM070396.1 3478253 G A

CM070396.1 3551516 C T

CM070396.1 3551559 A G

CM070396.1 3551586 A G

CM070396.1 3552098 T A

CM070396.1 3987356 T G

CM070396.1 4416894 G C

CM070396.1 4416927 G C

CM070396.1 4416971 G A

CM070396.1 4667860 G T

CM070396.1 4667869 C A

CM070396.1 4722993 C T

CM070396.1 4910650 T A

CM070396.1 5942063 A C

CM070396.1 6864863 GAGA G

CM070396.1 6889958 TAC T

CM070396.1 7091218 GGA G

CM070396.1 7293195 TTTC T

CM070396.1 8899593 GGAA G

CM070396.1 8899983 G GGAA

CM070396.1 9579558 C CTTTTTTTTTTTTTTTTTTTTTTTTTTTT

CM070396.1 9866353 G GGAGAGA

CM070396.1 9964300 CT C

CM070396.1 9998250 C CGT

CM070396.1 10417983 TCC T

CM070396.1 10542093 ATG A

CM070396.1 11039343 TC T

CM070396.1 11113883 CAT C

CM070396.1 11243482 A G

CM070396.1 11334112 GAGAT G

CM070396.1 12008128 G GA

CM070396.1 12406738 T TC

CM070396.1 12696190 C CTTTTTTTTTTT

CM070396.1 13004574 GC G

CM070396.1 13004668 TG T

CM070396.1 14097968 T TG

CM070396.1 14313407 G GCTCT

CM070396.1 15448441 T TG

CM070396.1 15740328 GGA G

CM070396.1 16254227 CGG C

CM070396.1 16541272 ATC A

CM070396.1 16611752 GGGGAGA G

CM070396.1 16759527 T TTG

CM070396.1 17196932 AGT A

CM070396.1 17419235 C CAAA

CM070396.1 17737517 TTC T

CM070396.1 17838500 TAC T

CM070396.1 18269097 CAG C

CM070396.1 18376526 A ATG

CM070396.1 18657427 G GATTT

CM070396.1 18678683 CAGAAGAAGA C

CM070396.1 19393527 C CTTTTT

CM070396.1 19446094 ATC A

CM070396.1 20592755 TTC T

CM070396.1 20627709 GGA G

CM070396.1 20791172 GGA G

CM070396.1 20811106 CCTT C

CM070396.1 21756852 AAAGAAG A

CM070396.1 22256355 CCT C

CM070396.1 22323844 G GAT

CM070396.1 22757627 A AGTAT

CM070396.1 23080093 CCTTT C

CM070396.1 23348049 G GATATAT

CM070396.1 24362312 TTA T

CM070396.1 24502054 T G

CM070396.1 25051690 GA G

CM070396.1 25134331 C CATAT

CM070396.1 25254804 TC T

CM070396.1 25254810 T TC

CM070396.1 25331218 GAGAAGA G

CM070396.1 25658029 A AATAGT

CM070396.1 26107180 C CAAT

CM070396.1 26130846 C CTTT

CM070396.1 26183250 G GGAA

CM070396.1 26183254 G GA

CM070396.1 26183891 G GAGAGGAGGAGGAAGAGGA

CM070396.1 26391679 G GTATT

CM070396.1 26719473 CCTTT C

CM070396.1 26728155 TGA T

CM070396.1 26815495 G A

CM070396.1 26951112 CGT C

CM070396.1 26964369 GC G

CM070396.1 27158727 TTC T

CM070396.1 27330330 T TTCTA

CM070396.1 27378901 T G

CM070396.1 27754773 G A

CM070396.1 28091465 GGAAA G

CM070396.1 28294328 T TTC

CM070396.1 28459472 AAG A

CM070396.1 28912940 CAT C

CM070396.1 29119576 ACTCTCT A

CM070396.1 29334030 A ACTT

CM070396.1 29522604 A AAAG

CM070396.1 30173958 C CATCT

CM070396.1 30245748 C CTCTA

CM070396.1 31117700 C CTTTTTTTTTTTT

CM070396.1 31199117 CGG C

CM070396.1 31872818 C CACAT

CM070396.1 32250686 A AAT

CM070396.1 32941065 A AATAT

CM070396.1 33287276 G GAC

CM070396.1 33303990 C CT

CM070396.1 33320215 CCT C

CM070396.1 34339060 C CATCT

CM070396.1 34978952 C CT

CM070396.1 35406277 CTCT C

CM070396.1 35972222 A AG

CM070396.1 36290873 GATAT G

CM070396.1 36323446 T TTCTC

CM070396.1 36432155 G GTATA

CM070396.1 36437667 CAAAG C

CM070396.1 36464684 TTC T

CM070396.1 36518583 G GTTTTTT

CM070396.1 36624669 CCT C

CM070396.1 36701282 ATC A

CM070396.1 36905905 CT C

CM070396.1 37061831 C CAAAA

CM070396.1 37150620 G GATTTATTT

CM070396.1 37271357 TC T

CM070396.1 37361969 G GGAA

CM070396.1 38938997 CCT C

CM070396.1 39575883 T TTAGA

CM070396.1 39590853 TC T

CM070396.1 39961469 ATATATC A

CM070396.1 40070106 GCTCT G

CM070396.1 40454200 TA T

CM070396.1 40903381 ACCC A

CM070396.1 41547641 AAG A

CM070396.1 42117329 AGG A

CM070396.1 42687019 ATC A

CM070396.1 43221408 CAG C

CM070396.1 43715689 AACAC A

CM070396.1 44308511 CT C

CM070396.1 44333788 AAAG A

CM070396.1 44414769 TTC T

CM070396.1 44621910 T TAC

CM070396.1 45275335 ACG A

CM070396.1 45322057 AC A

CM070396.1 45332769 CG C

CM070396.1 45680456 A AG

CM070396.1 45680869 CCTCT C

CM070396.1 45752521 CA C

CM070396.1 46003051 AT A

CM070396.1 46112956 GC G

CM070396.1 46166116 TC T

CM070396.1 46724396 C CATCT

CM070396.1 46731608 GATAT G

CM070396.1 48302322 CGT C

CM070396.1 48367504 GA G

CM070396.1 48625450 TAC T

CM070396.1 48632604 GTCTA G

CM070396.1 48928112 CATCT C

CM070396.1 48977363 G GATAT

CM070396.1 49102513 GGT G

CM070396.1 49613757 TCTC T

CM070396.1 49782014 CTTCT C

CM070396.1 49911312 C CATCT

CM070396.1 50114734 GGT G

CM070396.1 50285978 GAC G

CM070396.1 50435921 A AATAG

CM070396.1 50553745 TTC T

CM070396.1 50951588 AAC A

CM070396.1 51504452 TTCC T

CM070396.1 51896601 TTC T

CM070396.1 52399539 T TTA

CM070396.1 53668148 AGAGAAG A

CM070396.1 53729778 G GAGAT

CM070396.1 53729860 T TGATA

CM070396.1 54363534 A G

CM070396.1 54431284 TC T

CM070396.1 54668950 T G

CM070396.1 55261424 T TGGTAGTGGG

CM070396.1 55600121 CA C

CM070396.1 56318875 C A

CM070396.1 56550612 CTCT C

CM070396.1 56914115 TA T

CM070396.1 57389620 CCTT C

CM070396.1 57598481 GAC G

CM070396.1 57779112 T TTA

CM070396.1 57918739 G GAT

CM070396.1 58123557 C CTA

CM070396.1 58328476 G GAGAT

CM070396.1 58396331 TGA T

CM070396.1 58911630 CATCTAT C

CM070396.1 59154515 TC T

CM070396.1 59157142 CATTT C

CM070396.1 59616495 G GAT

CM070396.1 59657089 C CATA

CM070396.1 59919411 TGC T

CM070396.1 60122600 C CCTAT

CM070396.1 60559464 CAT C

CM070396.1 60790545 CCT C

CM070396.1 60956897 CCT C

CM070396.1 61835553 A ACT

CM070396.1 62070546 TTCTC T

CM070396.1 62253344 A AGATG

CM070396.1 63520578 A ACTAT

CM070396.1 63593209 C CT

CM070396.1 63953874 AAG A

CM070396.1 63970509 A G

CM070396.1 64184814 G GGA

CM070396.1 64701047 C CTCTA

CM070396.1 64748705 G GAGAT

CM070396.1 65503801 CTCTT C

CM070396.1 65697488 C T

CM070396.1 65697490 T TAC

CM070396.1 65932682 GC G

CM070396.1 66153669 C CAGT

CM070396.1 66237294 G GTA

CM070396.1 66442351 GGA G

CM070396.1 66854827 AGGAG A

CM070396.1 67812325 C T

CM070396.1 68525843 CTCTT C

CM070396.1 68678867 G GTAGA

CM070396.1 68737056 CAG C

CM070396.1 68774164 A AAC

CM070396.1 68912098 AAT A

CM070396.1 68982965 A AAG

CM070396.1 69022779 CCT C

CM070396.1 69216385 ATC A

CM070396.1 69489813 TTC T

CM070396.1 69862731 T TAAA

CM070396.1 70013727 TGC T

CM070396.1 70219616 AAGG A

CM070396.1 70284648 G GAT

CM070396.1 70560180 C A

CM070396.1 70605479 CTA C

CM070396.1 70933438 T G

CM070396.1 70933440 T G

CM070396.1 71137952 TTG T

CM070396.1 71318288 TAGA T

CM070396.1 71350588 GTC G

CM070396.1 71677256 GCT G

CM070396.1 72005041 ATATG A

CM070396.1 72040153 T G

CM070396.1 72458310 GCT G

CM070396.1 73211212 A AAT

CM070396.1 73356443 T TTTTA

CM070396.1 73695357 TACAC T

CM070396.1 73908973 G GA

CM070396.1 74289283 C CTTTTT

CM070396.1 74755827 T TGA

CM070396.1 74769099 AGT A

CM070396.1 75039239 AAAG A

CM070396.1 75276372 ACC A

CM070396.1 75882101 CCT C

CM070396.1 76074323 C CTA

CM070396.1 76724150 C CTTAT

CM070396.1 76945779 GGA G

CM070396.1 77320449 AAAG A

CM070396.1 77634415 CGA C

CM070396.1 77860394 TG T

CM070396.1 77868707 C CTCT

CM070396.1 78028902 CCTT C

CM070396.1 78399411 GGT G

CM070396.1 79161301 C CATGT

CM070396.1 79415415 GGA G

CM070396.1 80560429 CTCT C

CM070396.1 80832307 G C

CM070396.1 80913490 GTA G

CM070396.1 81211593 C CATAT

CM070396.1 81621107 C CTCTT

CM070396.1 82356258 G GTAGA

CM070396.1 82560959 TC T

CM070396.1 82956469 CACAT C

CM070396.1 82989449 CTCT C

CM070396.1 83090422 A ATATC

CM070396.1 83361927 G GT

CM070396.1 83472003 C CTTTTTTTTTTTTTTTT

CM070396.1 83886645 GTATATA G

CM070396.1 84146408 GTATATATA G

CM070396.1 84610224 C CGTGT

CM070396.1 84612356 A AAT

CM070396.1 85530116 GAT G

CM070396.1 85575200 A ACT

CM070396.1 85879669 G GTA

CM070396.1 86095283 CTTT C

CM070396.1 86134730 G A

CM070396.1 86134732 C T

CM070396.1 86134733 A G

CM070396.1 86739263 AAG A

CM070396.1 86745917 CATCT C

CM070396.1 86770597 CTTCT C

CM070396.1 87503927 G GAC

CM070396.1 87787012 T TTA

CM070396.1 87848728 G GAAGA

CM070396.1 88494013 GGGAGGA G

CM070396.1 88555544 G GTAGA

CM070396.1 88753623 GAGA G

CM070396.1 89053832 CATATAT C

CM070396.1 90132856 AG A

CM070396.1 90132859 GA G

CM070396.1 90215302 T TTC

CM070396.1 92185849 T TATAG

CM070396.1 92427242 A AAATAAT

CM070396.1 92451664 CAT C

CM070396.1 92550663 TCTCTGC T

CM070396.1 93289143 CG C

CM070396.1 93529051 GTA G

CM070396.1 93732538 CAG C

CM070396.1 94654818 ATC A

CM070396.1 94722703 G GTTTTTTTTTTTTTTTTTT

CM070396.1 94880437 C CCTCCTT

CM070396.1 94894739 TG T

CM070396.1 94974741 AGAG A

CM070396.1 95345439 T C

CM070396.1 95374048 GTCTTCT G

CM070396.1 95445599 A AAGAG

CM070396.1 95516668 AAGAG A

CM070396.1 95525607 CT C

CM070396.1 96352175 GGA G

CM070396.1 96743188 T TTC

CM070396.1 96893747 C CTTTTTTTT

CM070396.1 97162412 GCA G

CM070396.1 97565289 T TTC

CM070396.1 98021224 TTC T

CM070396.1 98288419 G GAGAA

CM070396.1 98480519 G GTTTTTT

CM070396.1 98735720 GGA G

CM070396.1 98851528 TTTC T

CM070396.1 98886986 TGA T

CM070396.1 98887652 T TTATC

CM070396.1 99741261 T TGATAGATA

CM070396.1 99746556 GGA G

CM070396.1 99804630 TG T

CM070396.1 100234991 C CAAGA

CM070396.1 100406840 CCTTCTTT C

CM070396.1 100562930 ATGG A

CM070396.1 100797930 T TTTG

CM070396.1 101202262 G GATTT

CM070396.1 101608098 G GAGA

CM070396.1 101918032 C CAT

CM070396.1 101979874 C CATCT

CM070396.1 103094663 A AT

CM070396.1 103946393 GGA G

CM070396.1 104179232 GGAGAA G

CM070396.1 104334868 TTC T

CM070396.1 104539302 TAC T

CM070396.1 104588377 CGAAG C

CM070396.1 104607533 G GAT

CM070396.1 104701166 G GGATA

CM070396.1 105099161 TTTC T

CM070396.1 105151995 C CTCT

CM070396.1 105279444 C CTTTTTTTTTTT

CM070396.1 105303702 GGAAGAAGAA G

CM070396.1 105388237 A AAGG

CM070396.1 105528652 T TAGA

CM070396.1 105548366 G GA

CM070396.1 105644194 ACTT A

CM070396.1 105973096 CT C

CM070396.1 106079345 T TTATC

CM070396.1 106080255 AATAG A

CM070396.1 106319537 CTCTT C

CM070396.1 106407479 C CT

CM070396.1 106466389 GCT G

CM070396.1 106567104 GAT G

CM070396.1 106737359 AGT A

CM070396.1 106774397 GGAAGAA G

CM070396.1 107283863 TTC T

CM070396.1 108032785 G GTTTT

CM070396.1 108378038 ACG A

CM070396.1 108812650 AAAG A

CM070396.1 108988875 G GAGA

CM070396.1 109455283 G GATAT

CM070396.1 109594580 C CT

CM070396.1 109923577 CG C

CM070396.1 109933211 CGG C

CM070396.1 110465604 GCT G

CM070396.1 110775281 A AAAG

CM070396.1 111082021 C CAAA

CM070396.1 111385628 C CTGTA

CM070396.1 111502600 ACT A

CM070396.1 111716932 CTG C

CM070396.1 111842660 TG T

CM070396.1 112142748 CGCTTGCTT C

CM070396.1 112229191 TTTC T

CM070396.1 112276489 TAC T

CM070396.1 112305033 G GTA

CM070396.1 112479534 CCT C

CM070396.1 113365392 CATAT C

CM070396.1 113421847 CCTTT C

CM070396.1 113623019 G GGAGA

CM070396.1 113905321 C CA

CM070396.1 114056415 G GTTT

CM070396.1 114170772 T TCTCCTC

CM070396.1 114794369 C T

CM070396.1 114908018 A AATT

CM070396.1 114997303 TTC T

CM070396.1 115062930 CAAT C

CM070396.1 115708327 A T

CM070396.1 116037182 T A

CM070396.1 116038543 CATAT C

CM070396.1 116241635 T TTA

CM070396.1 116695482 CGA C

CM070396.1 117848417 TTA T

CM070396.1 118103743 T TCA

CM070396.1 118699826 AAC A

CM070396.1 118741224 CCTT C

CM070396.1 119266727 G GGA

CM070396.1 119299534 TA T

CM070396.1 119484030 TTC T

CM070396.1 119524045 AAAG A

CM070396.1 119690564 G GAGA

CM070396.1 120491518 CCT C

CM070396.1 120633796 GAGA G

CM070396.1 120880844 TGA T

CM070396.1 121294527 A AAT

CM070396.1 121374752 TATAC T

CM070396.1 121987187 G GTA

CM070396.1 122459356 GTA G

CM070396.1 122535332 GGA G

CM070396.1 123104305 TTC T

CM070396.1 123412138 CGG C

CM070396.1 123593873 GTC G

CM070396.1 123604954 A G

CM070396.1 124011726 C CT

CM070396.1 124091835 T TGA

CM070396.1 124249339 C CAAA

CM070396.1 124519563 A AAGAT

CM070396.1 124520111 AAGAT A

CM070396.1 124633177 CTG C

CM070396.1 124884857 G T

CM070396.1 124916500 C CTTTTTTTTTTTTTTT

CM070396.1 125744755 C T

CM070396.1 126351724 A ATTCTTCTTC

CM070396.1 127924465 GGA G

CM070396.1 127933405 ATCTC A

CM070396.1 128201444 T TTC

CM070396.1 128323577 ATG A

CM070396.1 129158612 C CT

CM070396.1 130030432 CAG C

CM070396.1 130368512 CG C

CM070396.1 130990396 CT C

CM070396.1 131030376 GGA G

CM070396.1 131203613 GTCTA G

CM070396.1 132018765 AAAAGAAAGAAAG A

CM070396.1 132329679 AAG A

CM070396.1 132353046 TAAGA T

CM070396.1 133862679 GGAA G

CM070396.1 134652429 A AAT

CM070396.1 134996805 TTC T

CM070396.1 135175291 TAAGA T

CM070396.1 135370188 AT A

CM070396.1 135408885 GCTCT G

CM070396.1 135422200 C CAAAAAA

CM070396.1 135879325 A AATAT

CM070396.1 136039172 AT A

CM070396.1 136059805 CTCTT C

CM070396.1 136580224 A AATT

CM070396.1 137141448 CGG C

CM070396.1 137172282 GGA G

CM070396.1 137257636 CCTCT C

CM070396.1 137413314 A AG

CM070396.1 138001302 CG C

CM070396.1 138787377 T TTC

CM070396.1 139258424 CCT C

CM070396.1 139685101 CAG C

CM070396.1 140076955 CAT C

CM070396.1 140114082 TTA T

CM070396.1 140128906 GGAGA G

CM070396.1 140248515 AAGAG A

CM070396.1 140439545 GCTT G

CM070396.1 140440131 TTTCTTCTTC T

CM070396.1 140630301 TGA T

CM070396.1 140704667 G GAT

CM070396.1 140736800 ATCT A

CM070396.1 140804841 TTG T

CM070396.1 141034445 T TTA

CM070396.1 141296004 G GT

CM070396.1 142112342 TTC T

CM070396.1 142204306 CCT C

CM070396.1 142474930 AATAT A

CM070396.1 142532705 AAAG A

CM070396.1 142815143 C CGTGT

CM070396.1 142886580 G A

CM070396.1 143593044 A AATATAT

CM070396.1 144121253 CAG C

CM070396.1 144712542 AC A

CM070396.1 145404914 A AGTG

CM070396.1 145617290 AAG A

CM070396.1 145864649 GTC G

CM070396.1 145885808 TGA T

CM070396.1 146209886 CTG C

CM070396.1 146354243 G GAGA

CM070396.1 147004912 C CAAAAAAAAAAA

CM070397.1 650488 AAG A

CM070397.1 1293533 C CT

CM070397.1 1677614 C CT

CM070397.1 1948042 TTCTA T

CM070397.1 2343986 CT C

CM070397.1 2758522 T TAAAAAAAAA

CM070397.1 2927021 C CAAAAAAAAAA

CM070397.1 3403096 C CAAAAAAAAAAAA

CM070397.1 3682486 AAG A

CM070397.1 3973563 CAT C

CM070397.1 5111832 G GTTTTTT

CM070397.1 6110665 A AATATAT

CM070397.1 10164903 TGA T

CM070397.1 10426689 GC G

CM070397.1 10511129 C CT

CM070397.1 10672028 AC A

CM070397.1 10856909 CATAT C

CM070397.1 10931835 G GA

CM070397.1 11558738 TC T

CM070397.1 11821591 C CA

CM070397.1 13096740 CAGAG C

CM070397.1 13594463 AAG A

CM070397.1 13967975 CCT C

CM070397.1 14998457 GGA G

CM070397.1 16695725 CGA C

CM070397.1 17177674 T TTC

CM070397.1 18858546 TTC T

CM070397.1 18996368 C CTTTTT

CM070397.1 19029618 T TC

CM070397.1 19175423 CT C

CM070397.1 19175443 CCT C

CM070397.1 19179949 TTC T

CM070397.1 19778083 CGGGGG C

CM070397.1 19797937 C CTTTTTTTTTTTTTT

CM070397.1 19839167 AAGAT A

CM070397.1 20366191 CCT C

CM070397.1 21202855 GGA G

CM070397.1 21733297 GCT G

CM070397.1 22815752 G GCA

CM070397.1 22826914 C T

CM070397.1 23615787 GAGA G

CM070397.1 23838146 CTT C

CM070397.1 23838276 CCTT C

CM070397.1 23912276 G GTA

CM070397.1 24216641 CCT C

CM070397.1 24618280 TGG T

CM070397.1 25515061 AAG A

CM070397.1 25587879 T TGATA

CM070397.1 25795127 T TTA

CM070397.1 26161159 AGAG A

CM070397.1 27074274 CG C

CM070397.1 27176208 GAT G

CM070397.1 27471155 A AATAG

CM070397.1 27572064 GA G

CM070397.1 28059297 T G

CM070397.1 28278452 C CCTAT

CM070397.1 28570916 TTA T

CM070397.1 28587998 GC G

CM070397.1 28751344 GCA G

CM070397.1 29669762 A ATCTCTC

CM070397.1 29698734 TC T

CM070397.1 29780664 CG C

CM070397.1 30000513 C CAAAAAAAAAAAAAAAAAAAAA

CM070397.1 30084145 A ATGTG

CM070397.1 30820713 C CT

CM070397.1 31178179 GC G

CM070397.1 31516663 C CATCT

CM070397.1 31953792 TG T

CM070397.1 32114305 AGG A

CM070397.1 32278036 C CAAAAAAAAAAA

CM070397.1 32504251 G GTTTTTTTTTTTTTT

CM070397.1 33430662 GGT G

CM070397.1 33511082 CAG C

CM070397.1 33545581 TTC T

CM070397.1 33997395 AAT A

CM070397.1 35045282 GGGAA G

CM070397.1 35062612 G GT

CM070397.1 35363607 CG C

CM070397.1 36182715 CG C

CM070397.1 36293811 A ATATC

CM070397.1 36336596 GAC G

CM070397.1 37878929 TCG T

CM070397.1 37954257 CCT C

CM070397.1 38075318 GTATA G

CM070397.1 39009119 C CAT

CM070397.1 39061033 TTATA T

CM070397.1 40359257 AGG A

CM070397.1 40359267 A AG

CM070397.1 40410458 TC T

CM070397.1 40599595 C CTCT

CM070397.1 40815922 TTCTCTC T

CM070397.1 41225334 TTC T

CM070397.1 41619840 CAT C

CM070397.1 42248575 GGA G

CM070397.1 42333573 GAC G

CM070397.1 43237086 T TTCC

CM070397.1 44639062 GCT G

CM070397.1 44890590 T TCTC

CM070397.1 45030464 TCA T

CM070397.1 46078234 C CTTTTT

CM070397.1 46648606 AAG A

CM070397.1 47450331 GGA G

CM070397.1 47457453 GGA G

CM070397.1 47951995 C CAT

CM070397.1 48446326 G GTTTTTTTTTTTTT

CM070397.1 48520726 ATC A

CM070397.1 48795212 C CA

CM070397.1 49017723 AC A

CM070397.1 49581603 ACTAT A

CM070397.1 50394440 CCTCT C

CM070397.1 50725394 C CAGAT

CM070397.1 51013484 TTC T

CM070397.1 51196132 GTC G

CM070397.1 51611086 G GAT

CM070397.1 51902967 G GAT

CM070397.1 51961579 GGAA G

CM070397.1 52777944 AGAG A

CM070397.1 55077865 ATC A

CM070397.1 55547525 TCC T

CM070397.1 56613470 GGA G

CM070397.1 57510889 C CTATATA

CM070397.1 57569776 CCT C

CM070397.1 57640673 C CAAAAAAAAAA

CM070397.1 57709797 C CT

CM070397.1 57951560 G GTT

CM070397.1 58103555 TTC T

CM070397.1 58207760 C CTTTT

CM070397.1 58742132 GTC G

CM070397.1 60653255 CG C

CM070397.1 60798809 G T

CM070397.1 60894818 CATCT C

CM070397.1 61097611 AG A

CM070397.1 61188125 ATC A

CM070397.1 61563682 C CTTTTTTTT

CM070397.1 61885419 CAG C

CM070397.1 62386285 A G

CM070397.1 62754949 GAGAGA G

CM070397.1 62865363 C A

CM070397.1 63620230 CCTT C

CM070397.1 63824675 AAT A

CM070397.1 64037531 GGGA G

CM070397.1 64038445 A AAG

CM070397.1 65055426 GTC G

CM070397.1 66707706 GTC G

CM070397.1 67309672 TCC T

CM070397.1 67453199 TC T

CM070397.1 67453211 C T

CM070397.1 67788368 G GTTT

CM070397.1 68060433 G GGA

CM070397.1 68453679 T C

CM070397.1 68721231 AC A

CM070397.1 68830717 GAGAGA G

CM070397.1 69139072 TGC T

CM070397.1 69363621 TGA T

CM070397.1 69871477 CGA C

CM070397.1 69876210 TAC T

CM070397.1 70171031 C CA

CM070397.1 70569972 A AAT

CM070397.1 70996351 GGA G

CM070397.1 71122305 C CAA

CM070397.1 71168922 GGGA G

CM070397.1 71194713 GGA G

CM070397.1 72167536 G GTTTTTTTTTTTTTTTTT

CM070397.1 73425609 GGAAA G

CM070397.1 74244367 CATCT C

CM070397.1 74506732 CTCT C

CM070397.1 74846563 C CTTTTTTTTTTTTT

CM070397.1 75593124 CATT C

CM070397.1 76297790 ATTC A

CM070397.1 76759736 T TAC

CM070397.1 76900936 C CAT

CM070397.1 77178257 CAG C

CM070397.1 77340062 CATAG C

CM070397.1 77363385 GGA G

CM070397.1 78271585 A AAGAG

CM070397.1 78402843 A AAT

CM070397.1 78567578 C CATAT

CM070397.1 78936618 GAT G

CM070397.1 79044248 G GTAA

CM070397.1 81954284 CAG C

CM070397.1 82351401 C CATATAT

CM070397.1 82533261 G C

CM070397.1 82659649 G GGAA

CM070397.1 83091968 C CAAAAAAAAAAAAAAAAAA

CM070397.1 83515081 CTCTT C

CM070397.1 83773512 T G

CM070397.1 83773515 T G

CM070397.1 84635181 GTC G

CM070397.1 84986818 GCA G

CM070397.1 86903402 AATT A

CM070397.1 87504226 ATCTC A

CM070397.1 87546405 CCTCCT C

CM070397.1 88129076 GGA G

CM070397.1 88389480 GCA G

CM070397.1 88561379 GGA G

CM070397.1 88610202 CAT C

CM070397.1 90273222 T TAC

CM070397.1 90595040 ATC A

CM070397.1 91482638 C CTTTTTTTTTTTTTTT

CM070397.1 91833700 C CAT

CM070397.1 92132920 GTC G

CM070397.1 92405495 T TTA

CM070397.1 92752778 TC T

CM070397.1 93299814 TTG T

CM070397.1 93319873 C CATGT

CM070397.1 94836433 GGA G

CM070397.1 95339139 ATC A

CM070397.1 96337271 AAT A

CM070397.1 96680629 C CAT

CM070397.1 97468329 T TTATATA

CM070397.1 98325034 T G

CM070397.1 98325035 T C

CM070397.1 99394888 GAGA G

CM070397.1 100515777 TTC T

CM070397.1 100596894 T TAAA

CM070397.1 100839771 GGA G

CM070397.1 101513980 G GGAA

CM070397.1 102726853 G T

CM070397.1 102784656 CTAT C

CM070397.1 103137576 ACAT A

CM070397.1 103251893 CCTT C

CM070397.1 103283598 AAG A

CM070397.1 103305775 GGA G

CM070397.1 103595280 A G

CM070397.1 104140093 C CAAAAAAAA

CM070397.1 105317652 C CAT

CM070397.1 105781117 C CAG

CM070397.1 106450372 GC G

CM070397.1 106819667 AAG A

CM070397.1 106986921 ACG A

CM070397.1 107131861 C A

CM070397.1 107365938 AAG A

CM070397.1 109820507 A AT

CM070397.1 110760708 ATC A

CM070397.1 110924861 T TA

CM070397.1 111097082 TTC T

CM070397.1 111905215 C CTTA

CM070397.1 113258953 TGA T

CM070397.1 113591422 GCC G

CM070397.1 114146602 TGC T

CM070397.1 114472057 CCTTT C

CM070397.1 114855107 C CTTTTTTTTTTTTT

CM070397.1 115888916 GTC G

CM070397.1 116170315 GC G

CM070397.1 117038641 CCTCT C

CM070397.1 117059899 CG C

CM070397.1 117188815 GC G

CM070397.1 117825320 TGC T

CM070397.1 117833842 CAG C

CM070397.1 118269815 C CAT

CM070397.1 118369014 A C

CM070397.1 118623900 C CAAAAAAAAAAAA

CM070397.1 118880502 C CT

CM070397.1 118982038 GC G

CM070397.1 119247683 TTATC T

CM070397.1 119917447 TTC T

CM070397.1 120209156 TCC T

CM070397.1 120433556 G GTAGA

CM070397.1 120905305 GC G

CM070397.1 121002597 G GGAA

CM070397.1 121015817 A G

CM070397.1 121114869 GAGA G

CM070397.1 121237477 TTC T

CM070397.1 121275015 C CATAG

CM070397.1 121288602 TGATAGATA T

CM070397.1 121328007 GGATA G

CM070397.1 122092209 TG T

CM070397.1 122412792 AAG A

CM070397.1 122989686 GGATA G

CM070397.1 123158116 T TATA

CM070397.1 123433985 G GGA

CM070397.1 123644855 GGA G

CM070397.1 123879285 TTC T

CM070397.1 124083092 GGA G

CM070397.1 124549905 CCT C

CM070397.1 124716622 ATCT A

CM070397.1 125082417 G GTTTTT

CM070397.1 125162520 CCT C

CM070397.1 125450569 A ATGC

CM070397.1 126470014 AT A

CM070397.1 126635459 TC T

CM070397.1 127169046 AG A

CM070397.1 127246741 ATG A

CM070397.1 127256311 AAG A

CM070397.1 128282850 ACTAT A

CM070397.1 128530238 G GATAT

CM070397.1 128648285 C CCTT

CM070397.1 129102398 AG A

CM070397.1 129527461 GTC G

CM070397.1 129633628 C CAAAAAAAAAAAAAAAAA

CM070397.1 130108433 GC G

CM070397.1 130396176 GGA G

CM070397.1 130527081 GCA G

CM070397.1 130551852 C CTTT

CM070397.1 130600718 C CTTTT

CM070397.1 131537921 G GGAAGAA

CM070397.1 133239643 CT C

CM070397.1 133422822 GTGTGTC G

CM070397.1 134026922 T G

CM070397.1 134475328 G GGA

CM070397.1 134619346 T C

CM070397.1 134780914 GGA G

CM070397.1 135603162 GAAGA G

CM070397.1 135640787 C CA

CM070397.1 135689059 GGA G

CM070397.1 135726608 GATA G

CM070397.1 135965760 TTC T

CM070397.1 136000179 ATC A

CM070397.1 136126214 ACG A

CM070397.1 136142560 AAG A

CM070397.1 136281543 C CTTCT

CM070397.1 136379466 C CAAA

CM070397.1 136824407 T TCC

CM070398.1 181094 C A

CM070398.1 736708 G C

CM070398.1 828807 A C

CM070398.1 828921 T G

CM070398.1 829057 A G

CM070398.1 829089 TTGA T

CM070398.1 829288 C G

CM070398.1 829315 G T

CM070398.1 898364 T G

CM070398.1 1042757 T G

CM070398.1 1128302 TG T

CM070398.1 1325099 G T

CM070398.1 1363616 G T

CM070398.1 1363884 A T

CM070398.1 1364143 T C

CM070398.1 1374015 T G

CM070398.1 1450321 G C

CM070398.1 1726890 G A

CM070398.1 1726893 C T

CM070398.1 1776335 A G

CM070398.1 1776405 A T

CM070398.1 1776470 G A

CM070398.1 1815157 T C

CM070398.1 1844506 C G

CM070398.1 1844544 A C

CM070398.1 1844554 C A

CM070398.1 1933172 A T

CM070398.1 1933182 C T

CM070398.1 1933183 T G

CM070398.1 1943720 C T

CM070398.1 1943764 T G

CM070398.1 1978916 G T

CM070398.1 2045146 G T

CM070398.1 2108114 T G

CM070398.1 2121614 CT C

CM070398.1 2121625 C A

CM070398.1 2121651 T A

CM070398.1 2121669 T A

CM070398.1 2122054 G C

CM070398.1 2122057 A G

CM070398.1 2122601 C T

CM070398.1 2199178 T A

CM070398.1 2199562 A C

CM070398.1 2203132 A T

CM070398.1 2203239 A C

CM070398.1 2216341 A T

CM070398.1 2314188 A G

CM070398.1 2328011 C T

CM070398.1 2438659 G C

CM070398.1 2487388 T G

CM070398.1 2763388 G A

CM070398.1 2763452 A T

CM070398.1 2830952 T G

CM070398.1 2862500 T C

CM070398.1 2862510 C T

CM070398.1 2862513 A C

CM070398.1 2862514 A C

CM070398.1 2862516 A G

CM070398.1 2889043 G T

CM070398.1 2889052 T C

CM070398.1 2889184 A C

CM070398.1 2889609 A G

CM070398.1 2889622 A G

CM070398.1 2889629 T C

CM070398.1 2889834 A T

CM070398.1 2889946 C G

CM070398.1 2958359 T A

CM070398.1 2958376 T C

CM070398.1 3058702 T G

CM070398.1 3151172 A C

CM070398.1 3151184 A T

CM070398.1 3151464 T A

CM070398.1 3176556 A G

CM070398.1 3182843 T G

CM070398.1 3327054 A G

CM070398.1 3327110 C G

CM070398.1 3458665 G A

CM070398.1 3458667 C T

CM070398.1 3458668 T A

CM070398.1 3458707 C T

CM070398.1 3719289 C A

CM070398.1 3719294 T A

CM070398.1 3719307 T A

CM070398.1 3898328 T C

CM070398.1 3898337 C A

CM070398.1 3898342 A G

CM070398.1 3898370 C A

CM070398.1 3898376 C A

CM070398.1 3984482 T A

CM070398.1 4209110 A C

CM070398.1 4663390 T C

CM070398.1 4663391 G A

CM070398.1 4663784 A T

CM070398.1 4663855 G T

CM070398.1 4723726 A C

CM070398.1 4925932 C A

CM070398.1 5091728 C G

CM070398.1 5091738 T TA

CM070398.1 5091744 G A

CM070398.1 5091759 T C

CM070398.1 5221724 T G

CM070398.1 5317375 CA C

CM070398.1 5378186 C A

CM070398.1 5378191 C A

CM070398.1 5912783 G A

CM070398.1 5912785 G A

CM070398.1 5912809 A G

CM070398.1 5912818 A C

CM070398.1 6304575 C G

CM070398.1 6304586 T G

CM070398.1 6304670 G T

CM070398.1 6413175 G C

CM070398.1 6413190 A C

CM070398.1 6484778 A G

CM070398.1 6772089 T G

CM070398.1 8108339 C G

CM070398.1 8108362 T C

CM070398.1 8108377 A T

CM070398.1 9166871 AAT A

CM070398.1 9371286 TTTC T

CM070398.1 9602711 G T

CM070398.1 9845874 GAGA G

CM070398.1 11859008 CCT C

CM070398.1 11978305 C T

CM070398.1 12853370 CAG C

CM070398.1 14892959 AAG A

CM070398.1 15936380 TTC T

CM070398.1 16254559 ACT A

CM070398.1 17509304 GTATATA G

CM070398.1 18061133 G GATATAT

CM070398.1 18679057 T TTGTCCC

CM070398.1 18875496 T TCTTC

CM070398.1 19994572 C CAT

CM070398.1 21824402 ATC A

CM070398.1 23043201 G GTTTTT

CM070398.1 23223806 AATGTATGT A

CM070398.1 23971889 GT G

CM070398.1 24055191 A AT

CM070398.1 24173333 AAT A

CM070398.1 24398399 GAT G

CM070398.1 25435007 T TCA

CM070398.1 25846215 CAT C

CM070398.1 26321011 GAT G

CM070398.1 26773528 CAT C

CM070398.1 26884892 C A

CM070398.1 27563208 T TG

CM070398.1 27628225 T TTAC

CM070398.1 27803124 TTCTA T

CM070398.1 28190222 G GTA

CM070398.1 28474640 GC G

CM070398.1 28507321 AC A

CM070398.1 28659393 CTCTT C

CM070398.1 28661061 T TCTTC

CM070398.1 29410879 AG A

CM070398.1 30044795 ACTCT A

CM070398.1 30329485 ATATC A

CM070398.1 31444777 TCA T

CM070398.1 31717547 TTAA T

CM070398.1 31720722 GCT G

CM070398.1 31827921 GAGAT G

CM070398.1 32040705 C CTT

CM070398.1 32232517 G GTTT

CM070398.1 33163116 AAG A

CM070398.1 34061515 CTCTT C

CM070398.1 34067345 GCT G

CM070398.1 34164691 TCTTC T

CM070398.1 35401443 C CTAT

CM070398.1 35666623 C CTCTT

CM070398.1 36978224 GGA G

CM070398.1 37374717 T TGAA

CM070398.1 37762118 C CTTTTTTTTTTTTTT

CM070398.1 38738307 GT G

CM070398.1 38751147 C CT

CM070398.1 39350523 T TATC

CM070398.1 39482698 T TTC

CM070398.1 39568714 ACG A

CM070398.1 39930529 ATG A

CM070398.1 40531010 CTCT C

CM070398.1 40848082 ATC A

CM070398.1 40853472 GAGA G

CM070398.1 41038275 CCT C

CM070398.1 41461357 CCT C

CM070398.1 41826743 C CT

CM070398.1 41879374 TC T

CM070398.1 41937159 CAG C

CM070398.1 42214212 G A

CM070398.1 43160225 C CT

CM070398.1 44747271 A ACTAT

CM070398.1 45417902 C CT

CM070398.1 45467915 T TTTC

CM070398.1 45775512 GGA G

CM070398.1 46537018 C CTTT

CM070398.1 46677865 T G

CM070398.1 47357517 AAG A

CM070398.1 47458815 AAG A

CM070398.1 48586892 A T

CM070398.1 48595265 AATAT A

CM070398.1 48821176 TTC T

CM070398.1 48821246 TTC T

CM070398.1 48822770 T TC

CM070398.1 48822861 T TCC

CM070398.1 48918143 GGA G

CM070398.1 49182644 T TAGA

CM070398.1 49204794 C A

CM070398.1 49204795 C G

CM070398.1 49655588 A AAGAT

CM070398.1 49664657 TC T

CM070398.1 49705688 AAAAG A

CM070398.1 49978737 C CGGT

CM070398.1 50313419 A ATGTGTG

CM070398.1 50546733 TTC T

CM070398.1 50549108 CCTT C

CM070398.1 50644358 GTC G

CM070398.1 50664353 CCTTT C

CM070398.1 50702455 GCTT G

CM070398.1 50955942 C A

CM070398.1 51133875 GCTTCTT G

CM070398.1 51175917 A ATC

CM070398.1 51360326 CTTAT C

CM070398.1 51482233 AAGAG A

CM070398.1 52152894 AATAG A

CM070398.1 52577063 CATCT C

CM070398.1 52734097 GGAA G

CM070398.1 53107146 GCT G

CM070398.1 53285699 C CGAAG

CM070398.1 53522133 G GA

CM070398.1 53979530 AAGAT A

CM070398.1 54117246 C T

CM070398.1 54231038 C CACAT

CM070398.1 54548956 C CCA

CM070398.1 54824609 CCT C

CM070398.1 55026840 GAGA G

CM070398.1 55160707 C CAAAAAAAAAAA

CM070398.1 55171783 C CT

CM070398.1 55750398 CGA C

CM070398.1 56014344 A AGTGTGTGTGTGTGT

CM070398.1 56018058 TTTTA T

CM070398.1 56595861 T TG

CM070398.1 56651099 TGC T

CM070398.1 56946069 TCATC T

CM070398.1 58248338 G GTTTTTTTTTT

CM070398.1 58310793 G GTTTTTTTTTTTTTT

CM070398.1 58358365 A G

CM070398.1 58447430 C T

CM070398.1 58447451 C T

CM070398.1 58489450 C T

CM070398.1 58989942 CCT C

CM070398.1 60497209 G GATTC

CM070398.1 60602760 TGC T

CM070398.1 60644502 GCTT G

CM070398.1 61790136 GAT G

CM070398.1 61840872 A ATTC

CM070398.1 62472277 A C

CM070398.1 63410744 G GTT

CM070398.1 63631567 G GT

CM070398.1 63958172 TC T

CM070398.1 64390491 GCA G

CM070398.1 66561320 C CAAAAAA

CM070398.1 66644565 C CAA

CM070398.1 66832374 TCCCCCC T

CM070398.1 66944960 C CCTT

CM070398.1 67116226 CAGAA C

CM070398.1 68398185 CATAT C

CM070398.1 68461057 CCT C

CM070398.1 68547510 C CTT

CM070398.1 68679311 C CAAAAAAAA

CM070398.1 68726116 T A

CM070398.1 69171638 GGA G

CM070398.1 69619311 TTC T

CM070398.1 70289858 TTCC T

CM070398.1 70383466 GCCC G

CM070398.1 70466154 AC A

CM070398.1 71174408 AGG A

CM070398.1 71722850 C CA

CM070398.1 72420464 TGA T

CM070398.1 73684545 C CT

CM070398.1 73813542 TTTCC T

CM070398.1 74567839 TTC T

CM070398.1 74581321 T TA

CM070398.1 74610509 GAAGA G

CM070398.1 74675954 TTC T

CM070398.1 74869248 G GTTTTTTTTTTTTTT

CM070398.1 75394092 A ATG

CM070398.1 75451830 T TTGTA

CM070398.1 75566528 TTC T

CM070398.1 76167630 TATC T

CM070398.1 76540363 GCC G

CM070398.1 76994905 TCC T

CM070398.1 77147915 ATCTC A

CM070398.1 77191058 GGA G

CM070398.1 77337784 CTCTT C

CM070398.1 77484973 C CATATCT

CM070398.1 77917134 T TG

CM070398.1 78133180 A AAT

CM070398.1 78232059 C CATCT

CM070398.1 78468968 TTC T

CM070398.1 78647633 TGC T

CM070398.1 78696145 G GA

CM070398.1 78696182 G GGA

CM070398.1 78716943 TGA T

CM070398.1 79122627 T TTTC

CM070398.1 79613215 G GAT

CM070398.1 80221487 G GAAA

CM070398.1 80714844 CG C

CM070398.1 81425562 CGA C

CM070398.1 82087755 C CAAAAAAAAAAAAAAAA

CM070398.1 82234779 TGA T

CM070398.1 82387981 AAC A

CM070398.1 82421873 C T

CM070398.1 82581980 AAC A

CM070398.1 84262080 GGA G

CM070398.1 85818713 TTC T

CM070398.1 85826920 GGA G

CM070398.1 86171815 ACG A

CM070398.1 86488713 CATAA C

CM070398.1 86630495 A AATAT

CM070398.1 87073128 CAG C

CM070398.1 87322588 C CAAAA

CM070398.1 88239486 A AAT

CM070398.1 88249703 CT C

CM070398.1 88311307 C CAT

CM070398.1 88373145 A AG

CM070398.1 88590553 CAG C

CM070398.1 88729872 GGA G

CM070398.1 88761491 G GGAGA

CM070398.1 89284060 T TAC

CM070398.1 90015643 CCT C

CM070398.1 90332125 G GGA

CM070398.1 90471398 C CATCT

CM070398.1 91284714 T TTAA

CM070398.1 91469377 T TTG

CM070398.1 91547232 AAG A

CM070398.1 91592957 TTC T

CM070398.1 91793618 TTCC T

CM070398.1 92143769 T TTC

CM070398.1 92953302 CAG C

CM070398.1 93285975 T TTTA

CM070398.1 93579146 T TTTCTTC

CM070398.1 94266865 CATCT C

CM070398.1 94384857 AAT A

CM070398.1 94505865 TG T

CM070398.1 95308962 ATC A

CM070398.1 96165735 GTTAT G

CM070398.1 96552298 AAT A

CM070398.1 96586467 T TTC

CM070398.1 96648783 C CATCT

CM070398.1 96840761 TAC T

CM070398.1 96934545 GGA G

CM070398.1 97012011 TGA T

CM070398.1 97428510 GGAGA G

CM070398.1 97519026 AGG A

CM070398.1 97519031 G C

CM070398.1 97673894 A ATGTGTG

CM070398.1 98053651 A ATTC

CM070398.1 98253105 CG C

CM070398.1 99406288 CCTT C

CM070398.1 99660830 AGT A

CM070398.1 99931595 G GCTT

CM070398.1 99947128 A AT

CM070398.1 100374646 A AT

CM070398.1 100792262 GC G

CM070398.1 100981815 TAC T

CM070398.1 101086613 A AT

CM070398.1 101152044 T TAC

CM070398.1 101327395 TTTC T

CM070398.1 101509843 C CAAAAAAAAA

CM070398.1 101879604 CAGAA C

CM070398.1 102378193 CCT C

CM070398.1 102494941 T TTCTC

CM070398.1 102549116 C CATCT

CM070398.1 103220093 CG C

CM070398.1 103441849 TC T

CM070398.1 103838724 G GAT

CM070398.1 104052564 T TACAC

CM070398.1 104152081 CCT C

CM070398.1 104262373 TCCC T

CM070398.1 104777509 A AAAT

CM070398.1 104790833 GGA G

CM070398.1 104913150 C CTATA

CM070398.1 105396282 G T

CM070398.1 106242887 C CA

CM070398.1 106636895 T TTC

CM070398.1 106763447 CTA C

CM070398.1 106763465 CTA C

CM070398.1 106763675 ATATC A

CM070398.1 106932329 C CTTTTTT

CM070398.1 107077983 GTA G

CM070398.1 107622291 ACT A

CM070398.1 107840743 A AATAG

CM070398.1 108436632 ATC A

CM070398.1 109506618 AAG A

CM070398.1 109637224 CT C

CM070398.1 109786838 GGATA G

CM070398.1 109902053 GT G

CM070398.1 110006044 A AAAG

CM070398.1 110727829 C CTA

CM070398.1 111096197 GATCT G

CM070398.1 111447910 GGA G

CM070398.1 111656293 G GTC

CM070398.1 112153961 CGA C

CM070398.1 112296596 ACC A

CM070398.1 112756590 GAC G

CM070398.1 113539325 CAGAT C

CM070398.1 115037516 G GA

CM070398.1 115749358 T G

CM070398.1 116090992 TTTTC T

CM070398.1 116283453 TGAAA T

CM070398.1 117031867 G GATAT

CM070398.1 117399997 CG C

CM070398.1 117522120 TC T

CM070398.1 117813849 T TATA

CM070398.1 117958764 TC T

CM070398.1 118013678 AG A

CM070398.1 118193744 C CAAAAAAAAAAAAAA

CM070398.1 118199178 GTA G

CM070398.1 118309845 C CT

CM070398.1 118521054 CTGTGTGTGTGTG C

CM070398.1 118671703 G GAA

CM070398.1 119218067 CGG C

CM070398.1 119342984 CA C

CM070398.1 119737189 TGC T

CM070398.1 120384509 CTCCT C

CM070398.1 121252070 TTA T

CM070398.1 121692183 A AATAT

CM070398.1 121698179 A AAAG

CM070398.1 121774040 ACT A

CM070398.1 122012731 CCT C

CM070398.1 122948198 GGAA G

CM070398.1 122966530 C CATAT

CM070398.1 123246655 C CAAAAAAAAAAAAA

CM070398.1 123605774 C G

CM070398.1 123935629 TTTCTTC T

CM070398.1 124103833 TC T

CM070398.1 124273135 TTATC T

CM070398.1 124483256 CG C

CM070398.1 124493104 GC G

CM070398.1 125121541 GGA G

CM070398.1 125460702 G GGAAGA

CM070398.1 125460834 GGAA G

CM070398.1 125666103 GGA G

CM070398.1 125818522 TC T

CM070398.1 125823590 AAG A

CM070398.1 125939673 CAG C

CM070398.1 126220743 CA C

CM070398.1 126276934 C CG

CM070398.1 126682564 A G

CM070398.1 126985412 CT C

CM070398.1 127062792 GT G

CM070398.1 127190981 TGC T

CM070398.1 127373548 CG C

CM070398.1 127491032 C CAA

CM070398.1 127684261 TC T

CM070398.1 127973407 C CG

CM070398.1 128083735 TTG T

CM070398.1 128254432 AAG A

CM070398.1 128570467 C CTTTT

CM070398.1 128978048 TCACA T

CM070398.1 129241097 TTC T

CM070398.1 129359093 CCTCT C

CM070398.1 129775524 C CGGGGGG

CM070398.1 130270755 G GTTTTTTTT

CM070398.1 130846824 C CAAAAAAAAAA

CM070398.1 131098409 CAT C

CM070398.1 131183815 GCA G

CM070398.1 131203900 AAG A

CM070398.1 131808597 A AAC

CM070398.1 132038700 G T

CM070398.1 132270623 TTC T

CM070399.1 4199 CG C

CM070399.1 176641 CGG C

CM070399.1 687390 T A

CM070399.1 975855 C CTTTTTTTTTTTTTT

CM070399.1 1076971 GAAGA G

CM070399.1 1954523 TC T

CM070399.1 2127171 GAC G

CM070399.1 2142861 C A

CM070399.1 2226070 G GCCCCCCCCC

CM070399.1 2275966 GGA G

CM070399.1 2294623 G C

CM070399.1 2410949 T A

CM070399.1 2609638 C G

CM070399.1 2912050 TAC T

CM070399.1 3042804 C CA

CM070399.1 3118311 GTA G

CM070399.1 3158759 C CTTTTTTTTTTT

CM070399.1 3284701 T TCTTC

CM070399.1 3474496 G GGGGAA

CM070399.1 4228139 C CAAAAAAAAAAA

CM070399.1 4743823 GGATA G

CM070399.1 5063361 CTCTT C

CM070399.1 5259700 A G

CM070399.1 5278548 T TC

CM070399.1 5923230 G T

CM070399.1 6570873 AG A

CM070399.1 6600674 A AGAAG

CM070399.1 6633258 C CAAAA

CM070399.1 6796533 TCC T

CM070399.1 6823859 AC A

CM070399.1 6870962 C CTTCT

CM070399.1 6879854 GC G

CM070399.1 7176764 AAG A

CM070399.1 7302779 A AAGG

CM070399.1 7547799 CAG C

CM070399.1 7592113 A AGTGT

CM070399.1 7752438 A AAC

CM070399.1 8135401 A AATCT

CM070399.1 8334147 G GATAT

CM070399.1 8474952 TTCTTTCTC T

CM070399.1 8516196 A ATC

CM070399.1 8531813 TTAA T

CM070399.1 8678515 T TTATATA

CM070399.1 8729275 CATAT C

CM070399.1 9141174 ATATC A

CM070399.1 9305559 T C

CM070399.1 9921193 CCTT C

CM070399.1 10423137 C CTTTTTTTT

CM070399.1 11792777 T G

CM070399.1 12056656 GAC G

CM070399.1 12172777 C CG

CM070399.1 12179007 T TTTTC

CM070399.1 12818178 TTC T

CM070399.1 13476011 GTCTC G

CM070399.1 13536184 C A

CM070399.1 13607396 T TTTTC

CM070399.1 13659274 TTC T

CM070399.1 13662787 C T

CM070399.1 14067146 T C

CM070399.1 14943085 C T

CM070399.1 15066070 AAAAG A

CM070399.1 15184867 A AGAT

CM070399.1 16495528 T TA

CM070399.1 16526811 G GTTTTTTTTTTTTTTTTTTT

CM070399.1 17140509 T G

CM070399.1 17787104 T C

CM070399.1 18339180 T TTCTA

CM070399.1 18878863 C CT

CM070399.1 19220605 AAGAT A

CM070399.1 19316480 CT C

CM070399.1 19351494 AG A

CM070399.1 19376022 CGT C

CM070399.1 19585295 CCTCT C

CM070399.1 19623401 C T

CM070399.1 20442675 ATTAT A

CM070399.1 20507157 C CTAA

CM070399.1 20508004 CATAG C

CM070399.1 20508093 TGATA T

CM070399.1 20698667 AGT A

CM070399.1 20771283 CAGA C

CM070399.1 20908052 TGC T

CM070399.1 21098764 ACTC A

CM070399.1 21251058 A AAC

CM070399.1 21373745 CG C

CM070399.1 21673540 C CTTTTTTTTTTTTTT

CM070399.1 21748643 CG C

CM070399.1 22134263 T TA

CM070399.1 22475746 CCT C

CM070399.1 22523401 CCT C

CM070399.1 22553294 TGA T

CM070399.1 22598477 G GCTTC

CM070399.1 22639348 A AAGG

CM070399.1 22640637 GGA G

CM070399.1 23910921 TAC T

CM070399.1 23920772 GGT G

CM070399.1 23996739 GGA G

CM070399.1 23996970 AG A

CM070399.1 23997016 GA G

CM070399.1 23997024 G T

CM070399.1 24342928 TTAA T

CM070399.1 24920015 TGC T

CM070399.1 25228993 C T

CM070399.1 25245806 GGAAGAA G

CM070399.1 25962247 C G

CM070399.1 26468935 C T

CM070399.1 26555199 CCTT C

CM070399.1 26789188 GTC G

CM070399.1 26952911 ACT A

CM070399.1 27027733 CA C

CM070399.1 27514010 A ACATT

CM070399.1 28416408 T TTA

CM070399.1 28921549 A C

CM070399.1 28988343 G GAT

CM070399.1 29172967 GAGAAGA G

CM070399.1 29471724 C CTA

CM070399.1 29671894 ATC A

CM070399.1 29731966 G GTAGA

CM070399.1 29947752 ATG A

CM070399.1 30508587 AGAAG A

CM070399.1 31040001 GCTCTCT G

CM070399.1 31361272 CCA C

CM070399.1 31999247 T TTATATA

CM070399.1 32409886 C CA

CM070399.1 32676099 C CAT

CM070399.1 33024844 TTGTG T

CM070399.1 33031009 TGA T

CM070399.1 33468180 GAGA G

CM070399.1 33605392 TGATA T

CM070399.1 34054613 GGAA G

CM070399.1 34145370 AAGAG A

CM070399.1 34597267 T TAAAAAA

CM070399.1 34800561 GTC G

CM070399.1 35152427 CGAGAGA C

CM070399.1 35638973 TTC T

CM070399.1 35787543 A AATAT

CM070399.1 35807831 GCTT G

CM070399.1 35832426 GGA G

CM070399.1 36094438 TTTCC T

CM070399.1 36867894 TGATAGATA T

CM070399.1 36869569 CAAAG C

CM070399.1 36904366 TA T

CM070399.1 37096049 GGA G

CM070399.1 37700028 C CCTT

CM070399.1 38096878 C CAT

CM070399.1 38538033 GGA G

CM070399.1 38710711 T TTTCTTC

CM070399.1 38802139 TTC T

CM070399.1 39956067 TGA T

CM070399.1 40141768 CG C

CM070399.1 40578873 C CA

CM070399.1 41775526 C CTTT

CM070399.1 42239002 G GAT

CM070399.1 42592406 TGC T

CM070399.1 42603713 ATC A

CM070399.1 42619954 CAG C

CM070399.1 43026541 T TGATA

CM070399.1 43404879 TCTC T

CM070399.1 43834702 CGG C

CM070399.1 44137338 TG T

CM070399.1 44166420 A ATTTTTTTTTT

CM070399.1 44167431 TTC T

CM070399.1 44437186 CA C

CM070399.1 44437191 A G

CM070399.1 44437227 A G

CM070399.1 44437229 A T

CM070399.1 44623980 TCTC T

CM070399.1 44668862 CCCTCT C

CM070399.1 45362383 CCT C

CM070399.1 45487058 GTATA G

CM070399.1 45931428 AG A

CM070399.1 46458168 GCACA G

CM070399.1 47410245 T TTCTC

CM070399.1 47982728 A AACAC

CM070399.1 48925830 G GGAAGAA

CM070399.1 48978500 GGT G

CM070399.1 49048728 G GGAGGA

CM070399.1 50263486 G GGA

CM070399.1 50438487 G GGTATA

CM070399.1 50695896 A ACT

CM070399.1 50806165 CACT C

CM070399.1 50868897 G GT

CM070399.1 50922393 C CAAAAAAAAAAAAAAAA

CM070399.1 51048857 T TTATATATA

CM070399.1 51220688 CAT C

CM070399.1 51303270 A C

CM070399.1 51332028 TG T

CM070399.1 51450611 TTC T

CM070399.1 51510102 CAG C

CM070399.1 51515755 TTCTA T

CM070399.1 52055535 A AATAAGTTGATAGCATTTCCAGAATCGTC

CM070399.1 52572243 TTC T

CM070399.1 52771307 G GGGAA

CM070399.1 53020040 CAG C

CM070399.1 53728100 CTCCT C

CM070399.1 54387641 T C

CM070399.1 55225345 AAAGAAAGAAAGAAAG A

CM070399.1 55343955 A C

CM070399.1 55380147 C CG

CM070399.1 55421165 ACCC A

CM070399.1 56050856 GGAGA G

CM070399.1 56422000 G GTTTTTTTTTTTT

CM070399.1 56486691 GAGA G

CM070399.1 56768226 T TCA

CM070399.1 56846232 A AT

CM070399.1 56993152 ACC A

CM070399.1 57109857 AG A

CM070399.1 58082120 T C

CM070399.1 59666317 AAT A

CM070399.1 59764000 CATAT C

CM070399.1 59846094 GGAGA G

CM070399.1 59865281 GAT G

CM070399.1 60132380 G GAT

CM070399.1 60243833 AG A

CM070399.1 60323901 A AAT

CM070399.1 60481272 C CAT

CM070399.1 60607923 A ATCTCTC

CM070399.1 60764763 CTAAA C

CM070399.1 61133748 ATC A

CM070399.1 61179644 GCTT G

CM070399.1 61389699 TTC T

CM070399.1 61917081 TTAA T

CM070399.1 62259627 G GAAGA

CM070399.1 62524592 AC A

CM070399.1 63712227 C CTGTG

CM070399.1 64271607 AAC A

CM070399.1 64305009 GCATT G

CM070399.1 64486986 A AATCT

CM070399.1 64711187 GTC G

CM070399.1 64785978 T TTTTC

CM070399.1 64804793 A AAC

CM070399.1 65018141 A T

CM070399.1 65108700 TC T

CM070399.1 65141867 T TTC

CM070399.1 65992510 GA G

CM070399.1 66031865 A AATAT

CM070399.1 66198523 GGA G

CM070399.1 66294183 CAAGAAG C

CM070399.1 66423987 A AT

CM070399.1 66561142 AAG A

CM070399.1 66708786 TAC T

CM070399.1 67561049 C CTT

CM070399.1 67822143 G GAGGA

CM070399.1 67828155 TGG T

CM070399.1 68019519 A T

CM070399.1 68326241 AAGAG A

CM070399.1 69442692 C A

CM070399.1 70495926 ATC A

CM070399.1 70909406 TTC T

CM070399.1 70983433 GT G

CM070399.1 70990499 GTA G

CM070399.1 71482474 C CAT

CM070399.1 71986420 GGAA G

CM070399.1 72568126 CG C

CM070399.1 72661479 TC T

CM070399.1 72807445 G T

CM070399.1 73080553 TTA T

CM070399.1 73173380 TATAG T

CM070399.1 73186008 C T

CM070399.1 73509373 AAG A

CM070399.1 73888922 TGA T

CM070399.1 74454217 CCTAT C

CM070399.1 74784209 G A

CM070399.1 74789147 C CAT

CM070399.1 74879951 C CAT

CM070399.1 75066649 TA T

CM070399.1 75153643 G GGA

CM070399.1 75201131 T TAC

CM070399.1 75540996 TTCTC T

CM070399.1 76062997 C CCTAT

CM070399.1 76317357 GTA G

CM070399.1 76361333 G GGAA

CM070399.1 76421787 AAG A

CM070399.1 76677386 GAGA G

CM070399.1 76780088 G GGAGA

CM070399.1 77509146 C CTCTCT

CM070399.1 77647416 T TAC

CM070399.1 77814868 C CAT

CM070399.1 78017675 AT A

CM070399.1 78126070 G GTAGATA

CM070399.1 78171545 A AGT

CM070399.1 78213732 CCTTCTT C

CM070399.1 78679454 GGAGA G

CM070399.1 79131035 A ATATC

CM070399.1 79260729 GTA G

CM070399.1 79344018 TAC T

CM070399.1 79435088 GGA G

CM070399.1 79813645 C CCT

CM070399.1 80209175 TTTC T

CM070399.1 80594156 GGAGA G

CM070399.1 80606421 GAGA G

CM070399.1 80723067 C CA

CM070399.1 80797087 G GGAGA

CM070399.1 81005207 ATC A

CM070399.1 81110232 G GTAGA

CM070399.1 81366008 GGA G

CM070399.1 81811704 C CG

CM070399.1 82026111 TTATC T

CM070399.1 82173504 CAT C

CM070399.1 82229237 T G

CM070399.1 82378852 TTGTG T

CM070399.1 82515193 T TTCTC

CM070399.1 82699806 A G

CM070399.1 82918432 AGGG A

CM070399.1 82980181 ACT A

CM070399.1 83121087 G GAGAT

CM070399.1 83413891 TTTCC T

CM070399.1 83930305 AAG A

CM070399.1 84501858 GGA G

CM070399.1 84542178 A AATCT

CM070399.1 84763569 C CAT

CM070399.1 84863433 C CTATA

CM070399.1 84875405 GGA G

CM070399.1 85450152 GGA G

CM070399.1 85782770 G T

CM070399.1 85782772 G T

CM070399.1 86205489 TTC T

CM070399.1 86579180 C CTCT

CM070399.1 86640054 A AGAAG

CM070399.1 86720110 TGATA T

CM070399.1 86832859 TG T

CM070399.1 86832876 TG T

CM070399.1 86861363 CATAG C

CM070399.1 86895104 GCT G

CM070399.1 87035437 G GTCTC

CM070399.1 87709384 GA G

CM070399.1 87740826 CATCT C

CM070399.1 87761694 CTCTA C

CM070399.1 87790780 GTCTC G

CM070399.1 87892615 G GCTAT

CM070399.1 88269949 A AGTGT

CM070399.1 88339749 TG T

CM070399.1 89085329 C CA

CM070399.1 89170809 CGA C

CM070399.1 89198444 G GTTTTTTTTTTTTTT

CM070399.1 89215460 GGA G

CM070399.1 89855762 GGA G

CM070399.1 90097068 CCTTT C

CM070399.1 90189844 C CT

CM070399.1 90262835 C CATCTAT

CM070399.1 91439815 AT A

CM070399.1 91933407 CATCT C

CM070399.1 91957374 CCTTT C

CM070399.1 92373603 ATCTCTC A

CM070399.1 92421349 CAGAGAG C

CM070399.1 92814262 TTC T

CM070399.1 92846805 ACCCTCCCCACG A

CM070399.1 93524467 ACT A

CM070399.1 94517746 C CTTTTTTTTTTTTTTTTT

CM070399.1 94755230 GTCTA G

CM070399.1 94987624 C CATAG

CM070399.1 95588169 TTC T

CM070399.1 95944815 C CAA

CM070399.1 96572053 TTC T

CM070399.1 96662604 CA C

CM070399.1 96690864 TAC T

CM070399.1 97595719 CG C

CM070399.1 98283314 CCT C

CM070399.1 98342705 G A

CM070399.1 98808463 ATG A

CM070399.1 98967725 G GGTGT

CM070399.1 99561043 G GTTTTTTTTTTTTTTT

CM070399.1 100446466 ATGTGTG A

CM070399.1 100647691 CT C

CM070399.1 100786489 C CATAT

CM070399.1 101088434 GCA G

CM070399.1 101383950 C CA

CM070399.1 101636343 C CT

CM070399.1 101685880 TCCC T

CM070399.1 104452320 C T

CM070399.1 104897524 T G

CM070399.1 105041325 T A

CM070399.1 105342025 GCT G

CM070399.1 105393671 TGATA T

CM070399.1 105712022 AAC A

CM070399.1 106014621 AAC A

CM070399.1 106213712 T TGATA

CM070399.1 106272308 GGA G

CM070399.1 106413381 CCTTT C

CM070399.1 106591084 CTATA C

CM070399.1 106854003 CGA C

CM070399.1 107967756 GTC G

CM070399.1 108001433 GTC G

CM070399.1 108428738 AAAAG A

CM070399.1 109088358 CAG C

CM070399.1 109179819 C CA

CM070399.1 109436572 T TTCC

CM070399.1 110099106 AAG A

CM070399.1 110594034 T TA

CM070399.1 110742127 G GTTTTTT

CM070399.1 110836805 CG C

CM070399.1 114267771 GGT G

CM070399.1 115043832 GAA G

CM070399.1 115043858 A AG

CM070399.1 115116169 AAG A

CM070399.1 116502005 G GTTTTTTT

CM070399.1 116609448 C CTTTTT

CM070399.1 116962340 A AGTAT

CM070399.1 117023227 G GA

CM070399.1 117306514 CTCTT C

CM070399.1 117375055 CATCT C

CM070399.1 118589066 A AAGAT

CM070399.1 119067163 T TA

CM070399.1 119116190 A ATATC

CM070399.1 119787536 TTC T

CM070399.1 120948435 G C

CM070400.1 182072 A C

CM070400.1 699499 T TTTC

CM070400.1 859836 C CAT

CM070400.1 1655610 A ATTTT

CM070400.1 2197881 CA C

CM070400.1 2290626 C CATTT

CM070400.1 2484062 GGAA G

CM070400.1 3061598 G GA

CM070400.1 3255993 A AGT

CM070400.1 3257649 T TGA

CM070400.1 3452649 T TAAAAAA

CM070400.1 3659182 A AGTGTGTGTGTGTGTGT

CM070400.1 3747698 TGA T

CM070400.1 4174186 T G

CM070400.1 4325190 AAGAT A

CM070400.1 4459290 GCCC G

CM070400.1 4775894 AAG A

CM070400.1 5117398 AAG A

CM070400.1 5278100 GC G

CM070400.1 5656707 C CT

CM070400.1 6137687 GC G

CM070400.1 6212915 TTTC T

CM070400.1 6231963 GTGTGCTGTGC G

CM070400.1 6736919 C T

CM070400.1 6736923 A G

CM070400.1 6736930 A G

CM070400.1 6810735 A AACAT

CM070400.1 7094635 GGA G

CM070400.1 7212296 C CAA

CM070400.1 7575316 A AGTGT

CM070400.1 7576002 C CAAAAA

CM070400.1 7605391 C CTCT

CM070400.1 7616171 A AGAGAGAGAGAAG

CM070400.1 7817271 GGA G

CM070400.1 7947552 CATACAT C

CM070400.1 8548458 G GAGA

CM070400.1 8869646 C CATCT

CM070400.1 8962888 A ACTTCTT

CM070400.1 8981193 TC T

CM070400.1 9805285 GCA G

CM070400.1 9885849 GGAAGAA G

CM070400.1 10154809 CAG C

CM070400.1 10327112 CAGAT C

CM070400.1 10694782 GGA G

CM070400.1 10986293 G GCACA

CM070400.1 11342858 CATT C

CM070400.1 11594915 GTAGA G

CM070400.1 11638323 ACC A

CM070400.1 11696480 C A

CM070400.1 12636056 TAC T

CM070400.1 13094612 CTCTA C

CM070400.1 13154138 G A

CM070400.1 13321186 GCCC G

CM070400.1 13675252 T TATAG

CM070400.1 14883269 TC T

CM070400.1 14883272 TC T

CM070400.1 15029263 CCTTT C

CM070400.1 15402818 C CT

CM070400.1 15984660 A ATCT

CM070400.1 16008467 TTC T

CM070400.1 16010558 GGA G

CM070400.1 16146654 CGG C

CM070400.1 16205775 TTC T

CM070400.1 16360810 TAAAG T

CM070400.1 17181045 CG C

CM070400.1 18056032 GTT G

CM070400.1 18069281 G GAGAT

CM070400.1 18591192 T C

CM070400.1 18615969 C CAA

CM070400.1 20061441 CTCT C

CM070400.1 21409110 C CAAAAAA

CM070400.1 21524395 AAG A

CM070400.1 21899566 TGC T

CM070400.1 22069414 ATGTG A

CM070400.1 22231854 AAG A

CM070400.1 22530094 GTA G

CM070400.1 23858982 CTCTT C

CM070400.1 24079182 C CAT

CM070400.1 24478198 GAGA G

CM070400.1 24943689 CTGTG C

CM070400.1 25199991 AGT A

CM070400.1 25315407 G T

CM070400.1 25315408 T A

CM070400.1 25338966 AATAG A

CM070400.1 25417779 G GGAA

CM070400.1 25515931 C CAAAAAAA

CM070400.1 25626078 GGA G

CM070400.1 25861221 TAC T

CM070400.1 25963185 ATATC A

CM070400.1 26021006 A AAC

CM070400.1 26418707 CCTTT C

CM070400.1 26437640 CATAT C

CM070400.1 27045881 GA G

CM070400.1 27056246 GAAGA G

CM070400.1 27153287 C CCTTCTT

CM070400.1 27237189 AC A

CM070400.1 27642769 T TATAC

CM070400.1 27666827 A AGT

CM070400.1 27793837 T TATAG

CM070400.1 28083363 CCTT C

CM070400.1 28265525 T TATAG

CM070400.1 28268694 CCT C

CM070400.1 28445674 CTG C

CM070400.1 28480874 CG C

CM070400.1 28487330 C CGATA

CM070400.1 28597974 CA C

CM070400.1 28812470 CG C

CM070400.1 28941294 T TG

CM070400.1 28965777 AAGAG A

CM070400.1 28994210 TC T

CM070400.1 29147064 GTA G

CM070400.1 29373756 CG C

CM070400.1 29653229 TTC T

CM070400.1 29902182 TTC T

CM070400.1 30363019 GTAGA G

CM070400.1 30418793 A G

CM070400.1 30472266 A ACTT

CM070400.1 30488491 AAAGG A

CM070400.1 30520281 CT C

CM070400.1 30576454 T TTCTC

CM070400.1 30739027 GAAGA G

CM070400.1 31106383 CG C

CM070400.1 31433097 CTT C

CM070400.1 31433177 T TTTC

CM070400.1 31481204 TTTTC T

CM070400.1 31576190 G GGT

CM070400.1 31705465 G GTCCT

CM070400.1 32591798 GGAAGAA G

CM070400.1 32918735 T TTATCTATC

CM070400.1 33415436 T TAA

CM070400.1 33628263 T TAGAA

CM070400.1 33877372 C CCAATCCTG

CM070400.1 34317193 T TGATA

CM070400.1 34755618 GTCCA G

CM070400.1 35261159 TC T

CM070400.1 35785074 AAGAG A

CM070400.1 36090048 T TAA

CM070400.1 36498490 AG A

CM070400.1 36929531 C CA

CM070400.1 37075325 TTC T

CM070400.1 37116729 CT C

CM070400.1 37328525 ATC A

CM070400.1 37439580 GGAA G

CM070400.1 37619178 TTTC T

CM070400.1 38000439 AG A

CM070400.1 38485155 CG C

CM070400.1 39489052 CGG C

CM070400.1 39792729 ATC A

CM070400.1 40429017 TC T

CM070400.1 40824996 A AT

CM070400.1 41022101 G GTTA

CM070400.1 41227279 CAGAT C

CM070400.1 41841464 A AAT

CM070400.1 42112903 CAAGA C

CM070400.1 42499334 CAA C

CM070400.1 42815983 T TA

CM070400.1 42872887 CG C

CM070400.1 42927380 TC T

CM070400.1 43524453 CCT C

CM070400.1 43968036 C T

CM070400.1 44406171 GGAA G

CM070400.1 44599548 A AGAC

CM070400.1 44682391 CTG C

CM070400.1 44758083 A G

CM070400.1 44844576 G GTTTTTTTTTTTTTTT

CM070400.1 45625433 T TAAAAA

CM070400.1 45768514 CG C

CM070400.1 45838512 A AG

CM070400.1 46531917 A AG

CM070400.1 46695570 TG T

CM070400.1 46696493 G GTTTTTTTTTTTTT

CM070400.1 46798452 GAGA G

CM070400.1 46827841 G GTTTTTTTTTTTTTT

CM070400.1 47552965 TTTATA T

CM070400.1 47614714 GAC G

CM070400.1 47664931 GTC G

CM070400.1 47817662 C CTG

CM070400.1 47881353 C CT

CM070400.1 47944759 GGAGA G

CM070400.1 48665118 T C

CM070400.1 48981524 CCT C

CM070400.1 49004550 ACTC A

CM070400.1 49045637 TTGTA T

CM070400.1 49495187 C CA

CM070400.1 50025658 T TGAA

CM070400.1 51068789 C CATT

CM070400.1 52516853 CGG C

CM070400.1 52667775 CCT C

CM070400.1 53533008 C CT

CM070400.1 54049677 G A

CM070400.1 54676780 C CTT

CM070400.1 54676879 T TTC

CM070400.1 54830045 AAGAG A

CM070400.1 54861402 C CTTTTTTTTTTTTTTTTTT

CM070400.1 55604616 T TC

CM070400.1 55700920 G GTTTTTTTTTTTTTTT

CM070400.1 55833067 A G

CM070400.1 55914476 C CCTTT

CM070400.1 55944956 C CTTTTTTTTTTT

CM070400.1 56093878 T TTG

CM070400.1 56631033 C CAT

CM070400.1 56802076 A C

CM070400.1 57460255 G A

CM070400.1 57486576 CT C

CM070400.1 57498853 T TAC

CM070400.1 57659454 TAC T

CM070400.1 58293210 AC A

CM070400.1 58867934 G GTATA

CM070400.1 59783446 G T

CM070400.1 60105701 CA C

CM070400.1 60110756 A AAG

CM070400.1 60536164 AACAC A

CM070400.1 61910787 A ACGTG

CM070400.1 62053553 C CTGTG

CM070400.1 62164934 CGG C

CM070400.1 62451933 CAG C

CM070400.1 62598527 C CAT

CM070400.1 62667657 C CTCT

CM070400.1 62996696 T TGATA

CM070400.1 64284168 C CG

CM070400.1 64296820 A ATATT

CM070400.1 64452463 G GAGGC

CM070400.1 64538014 CCT C

CM070400.1 64740889 GAT G

CM070400.1 64819684 G GTTTTTTT

CM070400.1 66373182 ATG A

CM070400.1 66580563 G GGAGA

CM070400.1 66644655 ACT A

CM070400.1 67241421 TTC T

CM070400.1 67346358 G A

CM070400.1 67603773 C CAGAT

CM070400.1 67621595 CT C

CM070400.1 68071149 C CAAAT

CM070400.1 68436835 ATGG A

CM070400.1 69065281 GGA G

CM070400.1 69200591 CCT C

CM070400.1 69355195 CAGAT C

CM070400.1 69673467 A AAT

CM070400.1 69760912 TC T

CM070400.1 69791278 TTC T

CM070400.1 69928300 GGA G

CM070400.1 69968194 ATC A

CM070400.1 70361471 AAAAG A

CM070400.1 70441207 C CAAAAAAAAAAAAAAAAAAAAAA

CM070400.1 70825497 TCTTC T

CM070400.1 71180033 A AAG

CM070400.1 71390505 GGAAA G

CM070400.1 73309359 G GT

CM070400.1 73506804 C CT

CM070400.1 73838306 GTC G

CM070400.1 74000576 C CAAAAAA

CM070400.1 74540618 A AG

CM070400.1 74684570 GTC G

CM070400.1 74779139 TGC T

CM070400.1 75038260 TTTCC T

CM070400.1 75065906 CCT C

CM070400.1 75587954 TC T

CM070400.1 75594475 C CCT

CM070400.1 77594268 AAGAG A

CM070400.1 78930297 GGA G

CM070400.1 79396710 CCA C

CM070400.1 79798820 AGGGG A

CM070400.1 79964859 CAT C

CM070400.1 79965933 TTC T

CM070400.1 80238353 TTC T

CM070400.1 80563597 C CA

CM070400.1 81182516 TTTC T

CM070400.1 81250683 C CAA

CM070400.1 81645271 AAGGAGGGAGGGAGGGAGGGAGGGAGG A

CM070400.1 81916878 G GAGAAGA

CM070400.1 82585369 T TGAA

CM070400.1 82593863 CCT C

CM070400.1 82709215 G GAAA

CM070400.1 83069929 GGA G

CM070400.1 83836934 C CTTTTTTTTTTTTT

CM070400.1 83858827 C CAAAAAAAAAAAAAAAAAAA

CM070400.1 84038598 ATC A

CM070400.1 84189088 TA T

CM070400.1 84592374 AT A

CM070400.1 85907243 CG C

CM070400.1 86048121 C CT

CM070400.1 86856999 C CAAAAAAAAA

CM070400.1 87134010 CG C

CM070400.1 87527459 GT G

CM070400.1 87541558 TTC T

CM070400.1 88258281 C CT

CM070400.1 88796962 TCC T

CM070400.1 89458675 A AGGAGAGGGAGAG

CM070400.1 89458693 G GAAGAGAGAGGAGAGAGAGAAGAGAGAGGAGAGAGAGAAGAGAGAGGAGAGAGAGGAGAGAGAGGAGAGAGAGGAGAGAGAGGAGAGAGAGGAGAGAGAGAGAGGAGAGAGAGGA

CM070400.1 91924486 G GTTTTTTTTTTTTTTTTT

CM070400.1 92102419 TC T

CM070400.1 92151418 AC A

CM070400.1 92156827 GAT G

CM070400.1 92970646 TTC T

CM070400.1 93281063 TTCTC T

CM070400.1 93509231 GCTT G

CM070400.1 94799566 CCT C

CM070400.1 95392117 TTC T

CM070400.1 95631093 GGAA G

CM070400.1 96037495 C CAAAAAAAAAAAAAA

CM070400.1 96446680 ACCC A

CM070400.1 97303731 G A

CM070400.1 97314166 C CGAGA

CM070400.1 97574446 CCT C

CM070400.1 98035808 TAG T

CM070400.1 98127703 AAG A

CM070400.1 98321078 TTC T

CM070400.1 98473730 T C

CM070400.1 98827068 CG C

CM070400.1 99464105 G GCA

CM070400.1 99615725 CGG C

CM070400.1 99653377 AC A

CM070400.1 99860262 GCA G

CM070400.1 99893486 GGA G

CM070400.1 99904037 CAG C

CM070400.1 99997473 GTC G

CM070400.1 100047792 AAG A

CM070400.1 100367457 C CTTT

CM070400.1 100436911 A AAAAT

CM070400.1 100676410 T G

CM070400.1 100809170 G GATAA

CM070400.1 100834339 G GGAGA

CM070400.1 101052082 TGC T

CM070400.1 101270186 TA T

CM070400.1 101497967 CG C

CM070400.1 102576169 TTC T

CM070400.1 102921373 GTA G

CM070400.1 103164251 ATC A

CM070400.1 103652106 TC T

CM070400.1 104593675 GGGA G

CM070400.1 104815700 ATC A

CM070400.1 104865420 T C

CM070400.1 105123536 TC T

CM070400.1 105621627 C CCA

CM070400.1 106004742 G GGTT

CM070400.1 106004743 A ATCCTT

CM070400.1 106004745 G GA

CM070400.1 106004748 T G

CM070400.1 106427152 TTTC T

CM070400.1 107110256 C CAAAAAAAAAAAAAA

CM070400.1 107641241 C CTTG

CM070400.1 107712547 T A

CM070400.1 107712548 A G

CM070401.1 105849 AAT A

CM070401.1 213680 G A

CM070401.1 231459 G A

CM070401.1 258621 A AG

CM070401.1 268259 T TAAAA

CM070401.1 482431 TC T

CM070401.1 1276885 AAT A

CM070401.1 1567613 A AATAT

CM070401.1 1846940 C A

CM070401.1 2027868 GGAA G

CM070401.1 2459183 GTA G

CM070401.1 2601971 CAG C

CM070401.1 3027946 TAC T

CM070401.1 3040077 GGA G

CM070401.1 3208455 C CAA

CM070401.1 3518895 TCA T

CM070401.1 3970699 GAGA G

CM070401.1 4134501 CAG C

CM070401.1 4444466 A AG

CM070401.1 4942279 G A

CM070401.1 4942285 G C

CM070401.1 5251916 T C

CM070401.1 5591220 AG A

CM070401.1 5591537 G GA

CM070401.1 5676320 G GA

CM070401.1 6084056 G GTA

CM070401.1 8030545 G T

CM070401.1 9476408 T A

CM070401.1 9476409 A C

CM070401.1 10308792 A T

CM070401.1 10421565 A C

CM070401.1 10514363 T A

CM070401.1 10514443 T A

CM070401.1 10831436 T A

CM070401.1 10831437 G T

CM070401.1 12737701 T C

CM070401.1 13617789 C CTTT

CM070401.1 13732285 G GTTTTTTTTTTT

CM070401.1 13862424 GCT G

CM070401.1 14276568 T TA

CM070401.1 14552396 CAG C

CM070401.1 14896372 GGA G

CM070401.1 16598034 A ATAT

CM070401.1 16616754 C CAAAA

CM070401.1 18129659 CCT C

CM070401.1 18167333 AAG A

CM070401.1 18275484 GAAT G

CM070401.1 18498307 CTTCT C

CM070401.1 19108383 T TTCTC

CM070401.1 19760861 A AAC

CM070401.1 19916280 TTTTC T

CM070401.1 21498445 T C

CM070401.1 21950395 ACT A

CM070401.1 21962762 AAAAGG A

CM070401.1 22223778 TGC T

CM070401.1 22288236 AAG A

CM070401.1 22315211 GGAA G

CM070401.1 22680067 GTATA G

CM070401.1 23315205 TTG T

CM070401.1 23430093 TTTTC T

CM070401.1 24526803 GTCTC G

CM070401.1 24633147 CTCT C

CM070401.1 24694205 TTC T

CM070401.1 24748673 GTA G

CM070401.1 24781527 C A

CM070401.1 25512038 T TTATA

CM070401.1 25550334 TTCC T

CM070401.1 25646810 A AATAG

CM070401.1 26191127 AGAG A

CM070401.1 26194500 CTG C

CM070401.1 26225373 A ATG

CM070401.1 27574140 AAG A

CM070401.1 27980757 ACT A

CM070401.1 28298784 GGA G

CM070401.1 28956522 TAG T

CM070401.1 28959297 A AC

CM070401.1 29082572 GGA G

CM070401.1 30361339 GA G

CM070401.1 31453163 A C

CM070401.1 31632755 AAG A

CM070401.1 31883620 TTCTCTC T

CM070401.1 31968425 T C

CM070401.1 32974943 AAAAGAAAG A

CM070401.1 33255297 A AATAT

CM070401.1 33578640 GAT G

CM070401.1 33799440 GATAT G

CM070401.1 34055050 AT A

CM070401.1 34275682 A AATTT

CM070401.1 34984233 A C

CM070401.1 35047507 T TG

CM070401.1 35376762 A AT

CM070401.1 35558233 G GTTTTTTTTT

CM070401.1 35604992 A AATAT

CM070401.1 37202010 G GGT

CM070401.1 37288651 TCC T

CM070401.1 37420059 CCTT C

CM070401.1 37461466 TGAA T

CM070401.1 37614713 C CTA

CM070401.1 37724465 G GGA

CM070401.1 38354606 C CTGTG

CM070401.1 38619478 TTC T

CM070401.1 39669815 T TTTC

CM070401.1 40023660 GGAA G

CM070401.1 40789010 TTATAGA T

CM070401.1 40804803 ACT A

CM070401.1 42826403 AAAG A

CM070401.1 43813137 C CCTT

CM070401.1 43829726 TTC T

CM070401.1 43931325 AG A

CM070401.1 44111008 T TAAAAA

CM070401.1 44970700 T TAC

CM070401.1 46735288 TG T

CM070401.1 46735320 TG T

CM070401.1 46735324 G GGT

CM070401.1 47518519 G C

CM070401.1 47633345 TTTC T

CM070401.1 47671976 TTC T

CM070401.1 47771445 CAT C

CM070401.1 48385448 GT G

CM070401.1 48850346 AAG A

CM070401.1 49016590 CGA C

CM070401.1 49084682 TTC T

CM070401.1 49121535 A G

CM070401.1 50122383 A AAGAT

CM070401.1 50471724 A AAAG

CM070401.1 51338241 A ATATC

CM070401.1 52042462 C CAT

CM070401.1 52171393 G T

CM070401.1 52644602 GAT G

CM070401.1 52775052 T TTAGA

CM070401.1 52815675 T TC

CM070401.1 53161586 A AT

CM070401.1 53273682 T TCTTCTC

CM070401.1 53804777 CCTCCT C

CM070401.1 54087686 G GTAA

CM070401.1 54998633 C CAT

CM070401.1 55050075 CAT C

CM070401.1 55307588 TTTC T

CM070401.1 55523278 AAG A

CM070401.1 56805608 ATCT A

CM070401.1 57215905 C CAT

CM070401.1 57229204 GGA G

CM070401.1 58395415 T C

CM070401.1 58660544 A ATTC

CM070401.1 59253696 C CAT

CM070401.1 59381010 G A

CM070401.1 59446889 A ACTT

CM070401.1 59659744 GAT G

CM070401.1 59952816 G GTA

CM070401.1 60011360 TAG T

CM070401.1 60654148 GCT G

CM070401.1 60698251 TTCTC T

CM070401.1 60928302 C CAT

CM070401.1 60937477 T TTTA

CM070401.1 61722770 TTC T

CM070401.1 61999579 T TAGAC

CM070401.1 62522377 CAG C

CM070401.1 62973197 T TATAG

CM070401.1 63136823 TTA T

CM070401.1 64168681 CCT C

CM070401.1 64234124 CTCTT C

CM070401.1 64320722 CGA C

CM070401.1 64740332 T TGATA

CM070401.1 65051801 AAG A

CM070401.1 65178583 AATT A

CM070401.1 65913961 G GGAA

CM070401.1 66311680 GGA G

CM070401.1 66560122 CT C

CM070401.1 67310058 TC T

CM070401.1 67677046 AATAG A

CM070401.1 69012373 A C

CM070401.1 69413143 C CAAAA

CM070401.1 69520786 A AAAGG

CM070401.1 69930104 G T

CM070401.1 69960598 CTT C

CM070401.1 70568317 A AC

CM070401.1 71448159 T TTATC

CM070401.1 72703455 TCCCTCCCCCTCCCCTCC T

CM070401.1 72735740 GTA G

CM070401.1 73214056 G GGAAGAA

CM070401.1 73720019 ATAT A

CM070401.1 74037230 CCT C

CM070401.1 74282670 C CAAAAAAAAA

CM070401.1 74623932 TTC T

CM070401.1 75443110 TGA T

CM070401.1 76282898 TTC T

CM070401.1 76795078 GGA G

CM070401.1 76808325 AACAC A

CM070401.1 76937466 AAG A

CM070401.1 78361362 C CT

CM070401.1 80658474 A ATAT

CM070401.1 81594649 TGA T

CM070401.1 81760864 A ATAT

CM070401.1 81996843 T TTA

CM070401.1 82778030 CGA C

CM070401.1 82888098 C T

CM070401.1 83236439 AGC A

CM070401.1 83379281 G GGAGA

CM070401.1 83595766 G GAGA

CM070401.1 83683220 AG A

CM070401.1 83683234 GGA G

CM070401.1 84129200 A G

CM070401.1 84278088 TCACA T

CM070401.1 84507738 GTC G

CM070401.1 84530559 TTC T

CM070401.1 84720114 G GTTTTTTTTTTTT

CM070401.1 85128120 TC T

CM070401.1 85235180 CG C

CM070401.1 85325175 TTC T

CM070401.1 85469478 C CCTAT

CM070401.1 85983335 CATGT C

CM070401.1 86525952 ATC A

CM070401.1 87119159 TAC T

CM070401.1 87346053 CCT C

CM070401.1 87435751 GGA G

CM070401.1 88000369 GCC G

CM070401.1 88746001 TTC T

CM070401.1 88818139 T TC

CM070401.1 88831653 CTCT C

CM070401.1 89393523 ACTAT A

CM070401.1 89443561 GTCTA G

CM070401.1 89529491 C T

CM070401.1 90106362 CTCT C

CM070401.1 90780527 TGATA T

CM070401.1 91131996 CGA C

CM070401.1 91229388 A AAAAG

CM070401.1 91258427 CCT C

CM070401.1 91452606 C CGAAA

CM070401.1 92390993 T TAAAAAAA

CM070401.1 92779576 TTA T

CM070401.1 93101032 G GAAAAAAAA

CM070401.1 93152675 T TAC

CM070401.1 93489923 TGA T

CM070401.1 93804112 GC G

CM070401.1 93938206 G GTTTTTTTT

CM070401.1 94075145 TAGAGAG T

CM070401.1 94303693 AACACAC A

CM070401.1 94678946 G GGA

CM070401.1 94815805 A G

CM070401.1 94982101 TAC T

CM070401.1 95842477 TGA T

CM070401.1 95996955 T TTATC

CM070401.1 96508446 GC G

CM070401.1 96517475 C CTTTT

CM070401.1 96712647 TTCTCTCTC T

CM070401.1 97252202 C CAAAAAAAAAAAAAAA

CM070401.1 97658290 CGG C

CM070401.1 97698630 GGA G

CM070401.1 97848825 TTC T

CM070401.1 97961299 C CATAT

CM070401.1 98371946 T TA

CM070401.1 98438365 T TTATA

CM070401.1 99159669 GGA G

CM070401.1 99585941 T TTATA

CM070402.1 258253 C CAT

CM070402.1 511774 ACC A

CM070402.1 3184912 ATC A

CM070402.1 3501130 AATATAT A

CM070402.1 4601567 A C

CM070402.1 4848962 A C

CM070402.1 4883541 TGG T

CM070402.1 4978294 TTC T

CM070402.1 5235710 AATCT A

CM070402.1 5264399 C CTTTTTTTT

CM070402.1 5476942 GGA G

CM070402.1 5507626 CCT C

CM070402.1 5802724 TG T

CM070402.1 6964476 C CATAT

CM070402.1 7269287 TTCTC T

CM070402.1 8835598 T TTGTG

CM070402.1 8854217 T TTATATA

CM070402.1 9811918 TTC T

CM070402.1 10717635 GAGA G

CM070402.1 10739963 AAAAGAAAG A

CM070402.1 10783170 ATG A

CM070402.1 10801781 AG A

CM070402.1 10874126 G GAGGAAGGA

CM070402.1 11028503 TCG T

CM070402.1 11164464 C CA

CM070402.1 11251811 TC T

CM070402.1 11471476 CCTTT C

CM070402.1 11996976 TTA T

CM070402.1 12136505 CT C

CM070402.1 12191389 TGC T

CM070402.1 12238171 TG T

CM070402.1 12790089 G A

CM070402.1 12802011 TTG T

CM070402.1 13073192 TTC T

CM070402.1 13147403 C CAAAAAAAAAAAA

CM070402.1 13210179 A AAAAT

CM070402.1 13292909 C CGGGGG

CM070402.1 13893340 CGG C

CM070402.1 14931610 CG C

CM070402.1 15113010 CCT C

CM070402.1 15339687 CT C

CM070402.1 15422757 CG C

CM070402.1 15981334 G GAAGA

CM070402.1 16056267 G GTATT

CM070402.1 16691637 T TCCCCCCC

CM070402.1 16898780 C CT

CM070402.1 17287389 CGT C

CM070402.1 17369260 C CAAAAAAAAAAAAAAAA

CM070402.1 17696828 GC G

CM070402.1 18792548 GCA G

CM070402.1 18817919 CAAG C

CM070402.1 18818530 G GA

CM070402.1 19442985 GTATC G

CM070402.1 19556970 TCCC T

CM070402.1 19788064 A ATT

CM070402.1 20015267 TC T

CM070402.1 20140027 CAG C

CM070402.1 20223641 CG C

CM070402.1 20245177 TGAGA T

CM070402.1 20834818 ACT A

CM070402.1 22019642 G GGAGA

CM070402.1 22069720 CA C

CM070402.1 22115068 GT G

CM070402.1 22152491 GCAACA G

CM070402.1 24865513 T C

CM070402.1 24888713 CTA C

CM070402.1 25018169 CT C

CM070402.1 25058592 C CT

CM070402.1 25193682 TCTCTCC T

CM070402.1 25224370 AC A

CM070402.1 25352119 TC T

CM070402.1 26613381 T G

CM070402.1 26718479 CAG C

CM070402.1 26824964 GGA G

CM070402.1 27734273 C CTTT

CM070402.1 28334131 GGA G

CM070402.1 28393847 ACT A

CM070402.1 28699885 C CATCT

CM070402.1 28732498 GGA G

CM070402.1 28830061 T C

CM070402.1 28854006 AATAG A

CM070402.1 28980543 ACT A

CM070402.1 29511769 GTGAA G

CM070402.1 29596073 CAG C

CM070402.1 29609214 GTCTC G

CM070402.1 30072646 C CATCT

CM070402.1 30660047 T TTG

CM070402.1 30674091 GAGA G

CM070402.1 31033714 ACTAT A

CM070402.1 31184842 G GATAT

CM070402.1 31324119 T C

CM070402.1 31511748 CG C

CM070402.1 31592338 AG A

CM070402.1 32240705 TG T

CM070402.1 32306924 C CT

CM070402.1 32721323 GGAA G

CM070402.1 32861795 AC A

CM070402.1 32931842 A AC

CM070402.1 33010062 T TATAG

CM070402.1 33162270 TG T

CM070402.1 33187063 T C

CM070402.1 33216603 G GAGA

CM070402.1 33231978 G GAC

CM070402.1 33272607 GGA G

CM070402.1 33326853 G GTT

CM070402.1 33372714 C CCTTCTT

CM070402.1 33920460 C T

CM070402.1 34016426 AATATAT A

CM070402.1 34043647 AG A

CM070402.1 34067308 TTC T

CM070402.1 34114804 ACCT A

CM070402.1 34342247 T TAC

CM070402.1 34355233 T TTCTCTC

CM070402.1 34490613 TATAG T

CM070402.1 34490856 AAGAT A

CM070402.1 34540015 GTGA G

CM070402.1 34585801 TTC T

CM070402.1 34873398 CAG C

CM070402.1 34968491 GGAA G

CM070402.1 35014211 GT G

CM070402.1 35375324 A AAC

CM070402.1 35448352 A C

CM070402.1 35502502 AG A

CM070402.1 35598554 C CT

CM070402.1 36066730 G GGATA

CM070402.1 36163940 G GGATA

CM070402.1 36401640 AAG A

CM070402.1 36450775 T TAA

CM070402.1 36466372 GGA G

CM070402.1 36492034 T TTCTC

CM070402.1 37921021 CGG C

CM070402.1 38357568 TA T

CM070402.1 38867372 C CAAAAAAAAAAA

CM070402.1 38909748 C CGTGTGT

CM070402.1 39021803 CAGAT C

CM070402.1 39037253 TTC T

CM070402.1 39226599 CAG C

CM070402.1 39257796 C CT

CM070402.1 39529409 GT G

CM070402.1 39847047 CG C

CM070402.1 40357420 CG C

CM070402.1 41061238 GC G

CM070402.1 41674666 C CAAT

CM070402.1 41816786 C CTATATATA

CM070402.1 41976043 CCT C

CM070402.1 42397429 ACT A

CM070402.1 42456903 TC T

CM070402.1 42465278 TTCTC T

CM070402.1 42477432 G GGAA

CM070402.1 42515340 CT C

CM070402.1 42518976 GCTCT G

CM070402.1 42633979 GGA G

CM070402.1 42821906 G GAAA

CM070402.1 42853723 CTCT C

CM070402.1 43306983 CAGA C

CM070402.1 43389108 A C

CM070402.1 43389112 A C

CM070402.1 43790741 GAGA G

CM070402.1 43818983 GTCTA G

CM070402.1 44023248 AAGAG A

CM070402.1 44474889 C CCTAT

CM070402.1 44613919 TGA T

CM070402.1 44919375 ACG A

CM070402.1 45060580 CGGG C

CM070402.1 45657653 T TA

CM070402.1 46149153 AGAG A

CM070402.1 46149161 A AG

CM070402.1 46149166 A G

CM070402.1 46779793 G GAAAA

CM070402.1 47054532 T TTTTA

CM070402.1 47235196 TC T

CM070402.1 47315794 TG T

CM070402.1 47371757 TC T

CM070402.1 47765849 TC T

CM070402.1 47765859 C T

CM070402.1 47767320 CTATT C

CM070402.1 48237376 TTATC T

CM070402.1 48608584 CTG C

CM070402.1 48663906 T TTCTC

CM070402.1 49272606 G GGAAGAA

CM070402.1 50237904 T TTCTC

CM070402.1 50241682 GCA G

CM070402.1 50328337 TGA T

CM070402.1 50592993 GTC G

CM070402.1 50623162 G GTGGA

CM070402.1 50803648 CG C

CM070402.1 50928433 TCG T

CM070402.1 51799341 A G

CM070402.1 52047224 T TTC

CM070402.1 52204176 TA T

CM070403.1 702678 G GAT

CM070403.1 1302107 TATAG T

CM070403.1 1306818 ATATC A

CM070403.1 1632888 C CAT

CM070403.1 2381285 TTTTA T

CM070403.1 2467842 GTC G

CM070403.1 2626211 CAT C

CM070403.1 3230493 C CATATAT

CM070403.1 3269874 CTTCT C

CM070403.1 3621696 GGA G

CM070403.1 3958562 GGA G

CM070403.1 4306789 AC A

CM070403.1 4345825 T TTC

CM070403.1 4899891 C CAAAAAAAAAA

CM070403.1 4916370 TGA T

CM070403.1 5536001 A AAC

CM070403.1 5918424 T TTTA

CM070403.1 6230260 A G

CM070403.1 6472264 CATATAT C

CM070403.1 6610581 TTC T

CM070403.1 6666765 CAGAG C

CM070403.1 6994497 A G

CM070403.1 7571964 G GGAGA

CM070403.1 8177633 GTA G

CM070403.1 8340063 A AATAT

CM070403.1 8570352 CCCTCT C

CM070403.1 8655951 AAC A

CM070403.1 8670236 A AAT

CM070403.1 8777172 G C

CM070403.1 8943857 GT G

CM070403.1 9792093 AAG A

CM070403.1 11722925 GTCTA G

CM070403.1 12055176 C CAAA

CM070403.1 12196103 GAT G

CM070403.1 12384438 TTC T

CM070403.1 12770782 CA C

CM070403.1 12775535 GAC G

CM070403.1 12896971 A ACTT

CM070403.1 13080724 C CATAT

CM070403.1 13456361 T C

CM070403.1 13503396 CAG C

CM070403.1 14794254 G GAT

CM070403.1 15269193 CCTT C

CM070403.1 15613127 TTC T

CM070403.1 16010067 CAG C

CM070403.1 16923160 C CAT

CM070403.1 17077701 G GTTTTTTTT

CM070403.1 17135916 C CTTCT

CM070403.1 17757153 AATATAT A

CM070403.1 17813907 TA T

CM070403.1 17947064 G A

CM070403.1 17947065 A G

CM070403.1 18027650 C CT

CM070403.1 18027675 CT C

CM070403.1 18565146 CCT C

CM070403.1 18566992 A AGAGGAAGAG

CM070403.1 18681900 C CAAAG

CM070403.1 18800822 A C

CM070403.1 19366733 CTA C

CM070403.1 19449265 CT C

CM070403.1 19739370 G GAGAA

CM070403.1 19806975 G GTTTTTTTTTTTTT

CM070403.1 19846985 TTC T

CM070403.1 19876514 CAT C

CM070403.1 20323151 A AATATAT

CM070403.1 21231343 TA T

CM070403.1 21245729 ATCTC A

CM070403.1 21248910 G GTA

CM070403.1 22688470 ATC A

CM070403.1 22878496 CAG C

CM070403.1 22934474 G GTTTTT

CM070403.1 23205444 T TAAAAAAAAA

CM070403.1 23548746 CCTT C

CM070403.1 23653694 TTTTC T

CM070403.1 24455954 TTCTA T

CM070403.1 25040292 T TA

CM070403.1 25264175 C CAT

CM070403.1 26307262 CATTT C

CM070403.1 26418460 GTA G

CM070403.1 26995972 G T

CM070403.1 28090708 G GATAT

CM070403.1 28234514 TTC T

CM070403.1 28409433 GTA G

CM070403.1 28872490 A AAT

CM070403.1 30604894 C T

CM070403.1 30777013 C G

CM070403.1 30942522 G T

CM070403.1 30956853 A T

CM070403.1 31528789 T A

CM070403.1 31528801 T G

CM070403.1 31532738 G T

CM070403.1 31532743 C A

CM070403.1 32188807 G T

CM070403.1 32439613 T TA

CM070403.1 32553699 A T

CM070403.1 32825285 GGAGA G

CM070403.1 33912047 CCTAT C

CM070403.1 33956669 GGA G

CM070403.1 34340481 GC G

CM070403.1 34517776 CAG C

CM070403.1 34558553 GTC G

CM070403.1 34644312 GGAA G

CM070403.1 34855769 T TTATA

CM070403.1 35131015 G GGAA

CM070403.1 35161811 CCT C

CM070403.1 35383670 T TTTTC

CM070403.1 35394806 TTTCTTC T

CM070403.1 36008093 TAG T

CM070403.1 36666078 G GGAA

CM070403.1 36697951 T TTATA

CM070403.1 37335113 C CCT

CM070403.1 37745780 TTAA T

CM070403.1 37850545 CCT C

CM070403.1 38315368 CAT C

CM070403.1 38380984 AATAT A

CM070403.1 38505576 TTC T

CM070403.1 38567565 C CATATAT

CM070403.1 38603359 AAC A

CM070403.1 38640353 G GAGATAGAT

CM070403.1 38896037 ATATG A

CM070403.1 39035097 ATGTG A

CM070403.1 39206158 CAG C

CM070403.1 39269401 TGATA T

CM070403.1 39482454 ATC A

CM070403.1 39603398 AAG A

CM070403.1 39786695 AAC A

CM070403.1 39995685 G GTCTA

CM070403.1 40471021 A AAT

CM070403.1 40515979 TC T

CM070403.1 40540437 T C

CM070403.1 40660385 CT C

CM070403.1 41143990 CTCT C

CM070403.1 41172885 GCT G

CM070403.1 41535088 TAAGA T

CM070403.1 41591389 G GGAGA

CM070403.1 41713816 TC T

CM070403.1 41753952 GGA G

CM070403.1 41890050 C T

CM070403.1 42965094 A AGT

CM070403.1 43019759 C CTCTA

CM070403.1 43527655 GGAGA G

CM070403.1 43923929 CCT C

CM070403.1 44142917 GAGAT G

CM070403.1 44376033 G GAGAT

CM070403.1 44521309 T TTC

CM070403.1 44725463 TGA T

CM070403.1 44983894 GGATA G

CM070403.1 45122560 CTCT C

CM070403.1 45964162 AAG A

CM070403.1 45987473 CT C

CM070403.1 46019657 G A

CM070403.1 46092241 GC G

CM070403.1 46333652 TTTC T

CM070403.1 47000797 A AAAAT

CM070403.1 47317685 C CAT

CM070403.1 47423346 TTCTC T

CM070403.1 47546008 CAG C

CM070403.1 47817038 CTCT C

CM070403.1 48256035 GGA G

CM070403.1 48725913 TTC T

CM070403.1 48947404 A AGAAGGAAG

CM070403.1 49090397 G GA

CM070403.1 49153648 G GA

CM070403.1 51952434 TTTC T

CM070403.1 52232641 CAG C

CM070403.1 52835896 G GCA

CM070403.1 52993136 GGAGA G

CM070403.1 53816174 T TTCTA

CM070403.1 54209743 CATCT C

CM070403.1 54770678 CT C

CM070403.1 54903378 T TCATA

CM070403.1 54922573 C A

CM070403.1 54923281 TTTTC T

CM070403.1 55113293 CATAT C

CM070403.1 55395843 CCT C

CM070403.1 55425845 G GATAT

CM070403.1 55494625 GATATAT G

CM070403.1 55771253 TTC T

CM070403.1 56126433 GAT G

CM070403.1 56165389 C T

CM070403.1 56775218 C A

CM070403.1 57104318 CAAG C

CM070403.1 57104689 C CAAG

CM070403.1 58009391 AAAGG A

CM070403.1 58380996 G GTGTA

CM070403.1 58484128 TGA T

CM070403.1 58738226 AGT A

CM070403.1 58915364 CCT C

CM070403.1 59092177 AAG A

CM070403.1 59151802 CTCTT C

CM070403.1 59426502 T A

CM070403.1 59677708 C CAGAT

CM070403.1 59908746 AATATAT A

CM070403.1 60532752 AAT A

CM070403.1 61020141 A G

CM070403.1 61020142 G T

CM070403.1 61553880 GAT G

CM070403.1 61729072 G GAGA

CM070403.1 61843289 GAA G

CM070403.1 61970689 C CATATATAT

CM070403.1 61973867 T G

CM070403.1 62053979 C CATAT

CM070403.1 62094180 GTC G

CM070403.1 62161682 CCT C

CM070403.1 62202961 A ATATT

CM070403.1 63665013 AAG A

CM070403.1 63895845 TC T

CM070403.1 63895854 TC T

CM070403.1 63999343 G GAT

CM070403.1 64381618 TTC T

CM070403.1 64874556 GAGA G

CM070403.1 65355191 TAACAACAAC T

CM070403.1 65734300 CG C

CM070403.1 65881330 T TCTTC

CM070403.1 65971998 A AAAAT

CM070403.1 66243797 G GTTTTTTTTTTTT

CM070403.1 66566684 C CTTCA

CM070403.1 66612763 CGAGAGA C

CM070403.1 66756133 GATATAT G

CM070403.1 66790137 C CTTTTTTTTTTTTT

CM070403.1 68065432 TCTC T

CM070403.1 68069000 GGA G

CM070403.1 68107076 ATC A

CM070403.1 68276168 G GAGAA

CM070403.1 68572645 C CT

CM070403.1 68594824 GTACA G

CM070403.1 68600393 ACC A

CM070403.1 68883341 T TACAC

CM070403.1 69173840 C CTTTT

CM070403.1 69553682 T TGATA

CM070403.1 69602274 GAAGA G

CM070403.1 70129622 AGAAG A

CM070403.1 70453000 GAAGA G

CM070403.1 71810344 T TTAA

CM070403.1 72343686 C CAAAA

CM070403.1 72949909 T TCTTCTTC

CM070403.1 73126640 GTCC G

CM070403.1 73728266 T TTATC

CM070403.1 73842340 TAAGA T

CM070403.1 74492912 CCT C

CM070403.1 74876690 AAAAG A

CM070403.1 75082480 T TTTCC

CM070403.1 75186730 TTTC T

CM070403.1 76450568 C CCTCT

CM070403.1 76479755 G A

CM070403.1 77404502 GAAGA G

CM070403.1 77907541 C CT

CM070403.1 77907594 C CT

CM070403.1 79802912 GGAA G

CM070403.1 79875940 C CAGAT

CM070403.1 80234895 C CA

CM070403.1 80869214 CAG C

CM070403.1 81051076 CT C

CM070403.1 81315997 AAAAAT A

CM070403.1 82979801 GGA G

CM070403.1 83057272 AC A

CM070403.1 83689746 CAAT C

CM070403.1 83956216 CTCTA C

CM070403.1 84738723 CCT C

CM070403.1 84850719 A AAAAG

CM070403.1 85285707 TGC T

CM070403.1 85686656 GGA G

CM070403.1 85773371 TC T

CM070403.1 85887867 CAG C

CM070403.1 87020601 CAG C

CM070403.1 87296999 TGGA T

CM070403.1 87596576 CGA C

CM070403.1 87917128 GTC G

CM070403.1 88202451 C CTATATATA

CM070403.1 88539152 CCT C

CM070403.1 88947407 TTC T

CM070403.1 89006953 GGA G

CM070403.1 89370668 CCTT C

CM070403.1 89711787 ACG A

CM070403.1 90230524 G GTGCCTC

CM070403.1 90336865 ATG A

CM070403.1 91188249 G GGAGGAGGAGGAGGAGGTAAAGGAGGAGGAAGAGGAGAA

CM070403.1 92075884 AAC A

CM070403.1 92171418 TTC T

CM070403.1 92662390 GGA G

CM070403.1 93187128 GGA G

CM070403.1 93669976 G GT

CM070403.1 93669988 G A

CM070403.1 93669993 C T

CM070403.1 94601979 AAC A

CM070403.1 95069545 G GAAAAAAAA

CM070403.1 95267644 G GGAGA

CM070403.1 95297451 TGC T

CM070403.1 95939848 CG C

CM070403.1 96242051 C CA

CM070403.1 96302134 CATCT C

CM070403.1 96471889 C CAAAAAAAAAA

CM070403.1 97319202 AAG A

CM070403.1 97668816 TC T

CM070403.1 97852450 T TTA

CM070403.1 97890669 CTCTT C

CM070403.1 98156527 C CT

CM070403.1 98364365 CCT C

CM070403.1 98841326 GCTT G

CM070403.1 99173367 CGG C

CM070403.1 99733279 GATAT G

CM070403.1 99744186 TCC T

CM070403.1 99754263 T TATCC

CM070403.1 100136519 C CAGACAGAGAGACAGAG

CM070403.1 100316911 CCTTT C

CM070403.1 100871106 C CTTA

CM070403.1 100990043 G GGA

CM070403.1 101172905 CT C

CM070403.1 101633550 GGA G

CM070403.1 101827342 C CA

CM070403.1 102095223 CAG C

CM070403.1 102733051 AT A

CM070403.1 103761640 C CAT

CM070403.1 104007843 A ATCT

CM070403.1 107271710 GGA G

CM070403.1 108743322 TTC T

CM070403.1 108892909 AGT A

CM070403.1 108988644 G GTAAA

CM070404.1 36466 AG A

CM070404.1 181956 AAC A

CM070404.1 270682 TTA T

CM070404.1 683082 C CAAAAA

CM070404.1 928464 TTCTCTC T

CM070404.1 928546 T C

CM070404.1 1305487 TCCC T

CM070404.1 1854868 TAGA T

CM070404.1 2315882 AATGGATGG A

CM070404.1 3153128 TC T

CM070404.1 3160196 G GCA

CM070404.1 3572384 A AC

CM070404.1 4454864 T TTAA

CM070404.1 4662162 A ATATC

CM070404.1 4950762 C CAT

CM070404.1 4991164 GGA G

CM070404.1 5083921 A AAAT

CM070404.1 6094187 G GTTTTTTTT

CM070404.1 6190867 CGGGGGG C

CM070404.1 6259019 A AT

CM070404.1 7424378 ACG A

CM070404.1 7994513 CGGG C

CM070404.1 8248929 TTTC T

CM070404.1 8447024 C CTCTGTCTGAGTTCTGTCTGAGTTCTGTCTGAGTTCTGTCTGAGTTCTGTCTGAGT

CM070404.1 8724793 T TC

CM070404.1 9880929 G GA

CM070404.1 10713880 CG C

CM070404.1 11479230 GGAA G

CM070404.1 12230380 GCT G

CM070404.1 12716055 TTC T

CM070404.1 12741941 ACT A

CM070404.1 13188447 GTAGA G

CM070404.1 13332306 TGATA T

CM070404.1 14499015 ATC A

CM070404.1 15081510 TAG T

CM070404.1 15626838 CG C

CM070404.1 15640100 C CA

CM070404.1 16509850 A T

CM070404.1 17642441 GTC G

CM070404.1 18965952 GTC G

CM070404.1 19582744 T TATAA

CM070404.1 19784600 C CATATAT

CM070404.1 20474585 ACT A

CM070404.1 21260801 T TTA

CM070404.1 22001106 GTTC G

CM070404.1 22413258 C T

CM070404.1 23145143 CCTTT C

CM070404.1 23541870 A C

CM070404.1 23616297 TTC T

CM070404.1 23775300 C CAAAAAAAAAAAAAAAAAA

CM070404.1 23907545 A AG

CM070404.1 23907561 GAGA G

CM070404.1 24101078 GGA G

CM070404.1 25600290 TG T

CM070404.1 26291720 TTC T

CM070404.1 26517809 GCA G

CM070404.1 26980839 G GGA

CM070404.1 26987260 CT C

CM070404.1 27667261 T TATA

CM070404.1 28001364 TTC T

CM070404.1 28862781 T TG

CM070404.1 28983330 A AATAT

CM070404.1 29014120 CCTTT C

CM070404.1 29454740 AAT A

CM070404.1 29469008 GTAGA G

CM070404.1 29923319 ATCTC A

CM070404.1 30308796 T TTAGA

CM070404.1 30596531 CAGAT C

CM070404.1 32170005 C CTG

CM070404.1 32865879 GGA G

CM070404.1 32875712 TCTTC T

CM070404.1 32884365 T TGATA

CM070404.1 33228975 CG C

CM070404.1 33323719 TTC T

CM070404.1 33403497 TAGGGAGGGAGGGAGGGAGGGAGGGAGGGAGGGAGGG T

CM070404.1 33500914 TTC T

CM070404.1 33591997 AAAAG A

CM070404.1 33920485 GGA G

CM070404.1 34282536 C CCTTT

CM070404.1 34645173 C A

CM070404.1 34790542 GTCTA G

CM070404.1 34803716 C CTCT

CM070404.1 34877305 GAA G

CM070404.1 35436202 C CGT

CM070404.1 35564080 C CAG

CM070404.1 35642722 AGG A

CM070404.1 35642742 G GGGA

CM070404.1 35642834 G GAGA

CM070404.1 35710580 CATT C

CM070404.1 36009594 AC A

CM070404.1 36013083 C CTCTTCT

CM070404.1 36037717 ACC A

CM070404.1 36181204 G GAT

CM070404.1 36240041 T TTC

CM070404.1 37049234 GGAGAGA G

CM070404.1 37172091 C CTTCT

CM070404.1 37222281 GGA G

CM070404.1 37546552 CTA C

CM070404.1 37546587 CAT C

CM070404.1 37730415 TTAGA T

CM070404.1 37757991 TCAAA T

CM070404.1 37976242 C CTCTT

CM070404.1 37998415 CAGAG C

CM070404.1 38139627 T TTATATATA

CM070404.1 38246027 T TAAAAA

CM070404.1 38416805 T G

CM070404.1 38633707 T C

CM070404.1 38690290 CCT C

CM070404.1 38950051 TTCTA T

CM070404.1 38959383 C CTA

CM070404.1 39067224 G GA

CM070404.1 39186556 TTC T

CM070404.1 39206403 CCT C

CM070404.1 39220264 TAGAG T

CM070404.1 39814922 G GAT

CM070404.1 40811055 A AATGG

CM070404.1 40820343 GTC G

CM070404.1 41375835 ACG A

CM070404.1 42712791 T TA

CM070404.1 42742840 GGA G

CM070404.1 42892717 A AATAT

CM070404.1 42963060 TC T

CM070404.1 43476650 CA C

CM070404.1 43593670 CCTCT C

CM070404.1 43608294 GGA G

CM070404.1 43747516 C CATCT

CM070404.1 43781134 T TA

CM070404.1 44438111 G GTAGA

CM070404.1 45176958 GCT G

CM070404.1 45564695 G GA

CM070404.1 45638283 C CATGT

CM070404.1 45797984 CAGAGAG C

CM070404.1 46251961 GTA G

CM070404.1 46919197 A G

CM070404.1 46919217 G A

CM070404.1 48661096 G T

CM070404.1 48945467 A C

CM070404.1 49388598 T C

CM070404.1 49388621 T C

CM070404.1 49593126 G T

CM070404.1 50218288 A C

CM070404.1 51578655 CAT C

CM070404.1 51582488 T TATC

CM070404.1 53986263 T TAA

CM070404.1 54097645 A AAT

CM070404.1 54239897 GTA G

CM070404.1 54503570 GTC G

CM070404.1 54775560 C CAAAAAAAAAAAAAAAAAAAAAA

CM070404.1 55183721 C CATAT

CM070404.1 55783438 GAC G

CM070404.1 56151097 GCT G

CM070404.1 56409454 TC T

CM070404.1 56439595 GA G

CM070404.1 57255797 TGA T

CM070404.1 57612548 GTAT G

CM070404.1 58848794 C CAT

CM070404.1 59109669 CGTGT C

CM070404.1 59222018 TGA T

CM070404.1 59899783 CCT C

CM070404.1 60102903 AAT A

CM070404.1 60298935 ATCTCTC A

CM070404.1 60757398 T TAAAAA

CM070404.1 62387697 C CT

CM070404.1 62735353 TC T

CM070404.1 62776667 C T

CM070404.1 62810701 GTATC G

CM070404.1 62906954 TAC T

CM070404.1 63184653 CAG C

CM070404.1 63557793 T TATA

CM070404.1 63631426 AAG A

CM070404.1 63632454 T TCTC

CM070404.1 63651096 A AAGAG

CM070404.1 63792153 T TTAATC

CM070404.1 64717826 A C

CM070404.1 64929982 GAGA G

CM070404.1 65334112 C CT

CM070404.1 65375424 T TAAAAA

CM070404.1 65737490 GGA G

CM070404.1 66044500 CAG C

CM070404.1 66091297 AATAT A

CM070404.1 69253934 GTA G

CM070404.1 69441825 A AATAG

CM070404.1 69598210 CGA C

CM070404.1 69657031 TC T

CM070404.1 70001283 GA G

CM070404.1 70159902 A AAAAT

CM070404.1 70224267 T TTA

CM070404.1 70373639 GAGGA G

CM070404.1 71062803 G GATTT

CM070404.1 71323715 GTC G

CM070404.1 71982550 G GT

CM070404.1 72335197 CTCTT C

CM070404.1 72622533 CGG C

CM070404.1 72661038 GGAGAA G

CM070404.1 72861306 C CGT

CM070404.1 74313204 G GCTCT

CM070404.1 74895856 GGA G

CM070404.1 74935362 C CAT

CM070404.1 75034012 AAG A

CM070404.1 75277510 A AGAAAG

CM070404.1 75367544 TTC T

CM070404.1 75483967 C CAT

CM070404.1 76031198 GTT G

CM070404.1 76133253 GGAA G

CM070404.1 76359413 TTC T

CM070404.1 76516008 T TTCTC

CM070404.1 76733945 CAG C

CM070404.1 76744129 AAG A

CM070404.1 76942673 AATGT A

CM070404.1 77176903 G GGT

CM070404.1 77882162 GAAGA G

CM070404.1 78384311 C CTTT

CM070404.1 79074395 GAAGGA G

CM070404.1 80370356 CTG C

CM070404.1 80617921 C CAAA

CM070404.1 81550979 T C

CM070404.1 82277086 TC T

CM070404.1 82814015 TGA T

CM070404.1 83073433 TTC T

CM070404.1 83629822 T TAAAAAAAAAAAAAAAA

CM070404.1 83990990 TTATA T

CM070404.1 84073423 G GAAAAAAAAAAAAAA

CM070404.1 84152223 T TTATC

CM070404.1 84696036 CA C

CM070404.1 84826341 AAAG A

CM070404.1 85270005 AAAAG A

CM070404.1 85451929 CTCTT C

CM070404.1 85803204 C CTCT

CM070404.1 86044150 GGA G

CM070404.1 86361366 CCT C

CM070404.1 86490203 GTC G

CM070404.1 86696156 A AAT

CM070404.1 86908416 GGAA G

CM070404.1 87648087 TC T

CM070404.1 87755275 C CAA

CM070404.1 89556885 G GATAT

CM070404.1 89634185 CCT C

CM070404.1 89902131 C CTTTTTTTTTTTTT

CM070404.1 90251473 GAGAAGA G

CM070404.1 90251801 AAAG A

CM070404.1 90251922 AGAAG A

CM070404.1 90477759 T TTC

CM070404.1 90683170 G GA

CM070404.1 92297445 C CT

CM070404.1 93584455 C CAT

CM070404.1 93762428 G GTTTT

CM070404.1 93854553 C A

CM070404.1 94226176 TTTC T

CM070404.1 95393193 TAA T

CM070404.1 95579618 AAAAG A

CM070404.1 95704087 CAG C

CM070404.1 96856628 A ATGTGTGTGTGTGTG

CM070404.1 97295121 GGA G

CM070404.1 97538281 C CAGAA

CM070404.1 97540216 G GGTAT

CM070404.1 97548474 GGAGAGA G

CM070404.1 98353362 TG T

CM070404.1 98931925 C CA

CM070404.1 99050753 TG T

CM070404.1 99097473 AAG A

CM070404.1 99139136 C CA

CM070404.1 99401729 C CTT

CM070404.1 99531719 TG T

CM070404.1 99905085 CAG C

CM070404.1 100175607 CG C

CM070404.1 100456617 GGAA G

CM070404.1 101352162 GGGGAGAGGGGAGAGAGGAGAGAGGAGAGAGGAGAGAGGAGAGAGGGAGAGAGGAGAGAGGAGAGAGGAGAGGGGAGAGGGGAGA G

CM070404.1 101516493 T TCTGC

CM070404.1 101969440 TTTTTC T

CM070404.1 102490556 CCTAT C

CM070404.1 102663544 GCT G

CM070404.1 103070455 GGA G

CM070404.1 103990280 G GATACAT

CM070404.1 105160232 C CTATA

CM070404.1 105195589 CTCTT C

CM070404.1 105279750 C CATCT

CM070404.1 105714185 CCT C

CM070404.1 107388821 CA C

CM070404.1 107792864 AAG A

CM070404.1 108388007 CTCTT C

CM070404.1 108675198 A AAT

CM070404.1 108985817 TC T

CM070405.1 108474 A AACAC

CM070405.1 1194056 TTTC T

CM070405.1 1339457 T TA

CM070405.1 1430056 A AT

CM070405.1 1495261 G GAGA

CM070405.1 2028622 A AATAG

CM070405.1 2124274 TAC T

CM070405.1 3297144 CT C

CM070405.1 3400197 CGAAA C

CM070405.1 3695968 ACACG A

CM070405.1 3875644 G GTTTTTTTTTTTTT

CM070405.1 3910319 C T

CM070405.1 5943728 GGA G

CM070405.1 6992792 T TC

CM070405.1 7341533 CAG C

CM070405.1 7501049 GTCTA G

CM070405.1 7779634 C CAAAA

CM070405.1 8033514 G GA

CM070405.1 8826185 G GTTTTTT

CM070405.1 9708161 AG A

CM070405.1 9933592 G GCCCCCCCCCCC

CM070405.1 10334124 CCTAT C

CM070405.1 10372943 C T

CM070405.1 10494075 TCTC T

CM070405.1 10606059 GGA G

CM070405.1 11100319 TTTC T

CM070405.1 12391738 C CTG

CM070405.1 12934750 GAAGA G

CM070405.1 13210285 TG T

CM070405.1 13239623 AAG A

CM070405.1 13956868 C CTCTA

CM070405.1 14010471 C CTTTTT

CM070405.1 14026422 GGA G

CM070405.1 14486778 A AGT

CM070405.1 14809039 GCA G

CM070405.1 15442020 TTATC T

CM070405.1 15786354 A ATG

CM070405.1 16473042 C CTCT

CM070405.1 16563383 TTG T

CM070405.1 17543324 CA C

CM070405.1 17894738 GTA G

CM070405.1 18459047 AC A

CM070405.1 19041873 CAG C

CM070405.1 19158757 C CAAAAAAAAAAAAA

CM070405.1 20175370 AG A

CM070405.1 20782463 G GA

CM070405.1 21142535 G GTTTTT

CM070405.1 21340631 AC A

CM070405.1 21863432 T TC

CM070405.1 22080774 GAAGA G

CM070405.1 22457154 C CAAAAAAAAAAAAAAAAA

CM070405.1 22940311 CT C

CM070405.1 23380627 A G

CM070405.1 23432478 CG C

CM070405.1 24039646 C CTTTTTTTTTTTTTT

CM070405.1 24174693 G GTAGA

CM070405.1 24355090 CT C

CM070405.1 24540465 CA C

CM070405.1 24609032 CTTCCT C

CM070405.1 24698794 C CATAT

CM070405.1 25008638 CGA C

CM070405.1 25088797 GAC G

CM070405.1 25094596 G GGA

CM070405.1 25123555 G GGA

CM070405.1 25663844 AAAG A

CM070405.1 26675706 A AG

CM070405.1 26730095 T TAAAAA

CM070405.1 27117083 ATCTC A

CM070405.1 27119375 TTC T

CM070405.1 27136704 T TAAAAA

CM070405.1 27257226 CA C

CM070405.1 28209010 C CTATATATATA

CM070405.1 28238090 C CTTTTTTTTTTT

CM070405.1 28520819 C CTTTTTTTTTTTTT

CM070405.1 29177750 C CTTTTTTT

CM070405.1 30186201 G GT

CM070405.1 30311768 TTC T

CM070405.1 31003624 TGC T

CM070405.1 31597082 T TC

CM070405.1 32234732 T TTCTTC

CM070405.1 32317676 GAATA G

CM070405.1 32488729 T C

CM070405.1 32701482 CATCT C

CM070405.1 32770283 TGAA T

CM070405.1 33199354 C CTCCTCT

CM070405.1 33318167 A T

CM070405.1 33959636 TTTC T

CM070405.1 34530408 G GGAGA

CM070405.1 35129212 CT C

CM070405.1 35156965 C CAAAAAAAAAAAAAAAAAAAAAAAAA

CM070405.1 35496020 GGA G

CM070405.1 36052577 AACAC A

CM070405.1 36128198 T TCA

CM070405.1 36893005 TTC T

CM070405.1 37212747 T TAGGA

CM070405.1 37564552 AAGG A

CM070405.1 37684817 G GCA

CM070405.1 38066255 GTC G

CM070405.1 38408126 CCA C

CM070405.1 38713065 ATC A

CM070405.1 38971227 GCT G

CM070405.1 39120717 C T

CM070405.1 39381207 GGAA G

CM070405.1 39867075 C CAAAAAAAAAAAAA

CM070405.1 39871718 GC G

CM070405.1 40210555 CAG C

CM070405.1 40370308 AC A

CM070405.1 40785629 CA C

CM070405.1 41718341 TCC T

CM070405.1 41794053 GGA G

CM070405.1 42186521 CG C

CM070405.1 42367307 GCTAT G

CM070405.1 42508067 T TTA

CM070405.1 42935986 T TAATAAATA

CM070405.1 43368253 TGC T

CM070405.1 43521543 CAG C

CM070405.1 43917933 ACG A

CM070405.1 44163292 CCT C

CM070405.1 44650908 CCCT C

CM070405.1 45610781 GCC G

CM070405.1 45816798 G GCA

CM070405.1 46036151 AAG A

CM070405.1 46610644 TC T

CM070405.1 46977816 GGA G

CM070405.1 47872112 C A

CM070405.1 47872113 G C

CM070405.1 48194226 C G

CM070405.1 48194228 G A

CM070405.1 49290021 G C

CM070405.1 50534812 GAGA G

CM070405.1 50628379 GAGAA G

CM070405.1 50922655 GGA G

CM070405.1 51447726 ACT A

CM070405.1 51997590 AAC A

CM070405.1 52060273 AG A

CM070405.1 53040020 CGT C

CM070405.1 53138913 GGA G

CM070405.1 53458871 C CTTTTT

CM070405.1 53676157 TAAGA T

CM070405.1 54262776 GCA G

CM070405.1 55131093 TC T

CM070405.1 56105731 CAGAA C

CM070405.1 56419110 AG A

CM070405.1 56899835 CAG C

CM070405.1 57108939 TTC T

CM070405.1 57232507 TTC T

CM070405.1 57864790 CTT C

CM070405.1 57864806 T C

CM070405.1 57951031 GGA G

CM070405.1 58438040 CAG C

CM070405.1 60022729 TTC T

CM070405.1 60755870 C CTTTTTTTTTTTT

CM070405.1 60782864 CCT C

CM070405.1 61575922 AAGAG A

CM070405.1 61978432 GGA G

CM070405.1 62660389 TTC T

CM070405.1 63374310 CTCT C

CM070405.1 63510064 T TGATA

CM070405.1 63583117 T TGAA

CM070405.1 63828627 GGAA G

CM070405.1 63925895 GAGA G

CM070405.1 63978937 TTCTCTC T

CM070405.1 64697737 AAG A

CM070405.1 65201040 C CATAG

CM070405.1 65986397 GGAGA G

CM070405.1 66369237 A AT

CM070405.1 66377746 CCT C

CM070405.1 66761338 CAG C

CM070405.1 67512551 C CAT

CM070405.1 68670208 GAGA G

CM070405.1 68848711 ATC A

CM070405.1 70951463 GGA G

CM070405.1 71420260 C CAAT

CM070405.1 71750229 A ATC

CM070405.1 71901843 TTC T

CM070405.1 72292916 CTCTA C

CM070405.1 72380829 C CAGA

CM070405.1 72380910 CAGA C

CM070405.1 72427957 T TC

CM070405.1 72456768 CT C

CM070405.1 72617464 C CAT

CM070405.1 72841046 GAGA G

CM070405.1 73271866 CATCT C

CM070405.1 73614230 GGA G

CM070405.1 74509403 G GT

CM070405.1 74942408 T G

CM070405.1 75769921 C CAGAT

CM070405.1 75804176 A AT

CM070405.1 76519784 ATC A

CM070405.1 76533192 A AC

CM070405.1 76648168 AAT A

CM070405.1 76686801 AAT A

CM070405.1 76851897 T TA

CM070405.1 77334069 A AT

CM070405.1 77454185 T TAGAA

CM070405.1 77998459 CTCT C

CM070405.1 78793106 CGA C

CM070405.1 78942307 G GGAAA

CM070405.1 79315517 CCT C

CM070405.1 79792830 A AATATAT

CM070405.1 81070714 CCT C

CM070405.1 81076367 TTC T

CM070405.1 81322046 T TA

CM070405.1 82983925 C CATCT

CM070405.1 83568493 GAGA G

CM070405.1 83572629 GGAGA G

CM070405.1 83890098 CCCT C

CM070405.1 84361091 A AGAAG

CM070405.1 84644533 T TCTC

CM070405.1 85127448 G GTTTTTTTT

CM070405.1 85718681 TGA T

CM070405.1 86069466 C CTTTTTT

CM070405.1 86096684 A AAGAG

CM070405.1 86183012 GTATA G

CM070405.1 86237077 CGAAA C

CM070405.1 87100875 ATTC A

CM070405.1 87178050 GGA G

CM070405.1 87408391 TTCTC T

CM070405.1 87643700 A AG

CM070405.1 87747850 AAAGAAG A

CM070405.1 88116731 G T

CM070405.1 89416236 A AT

CM070405.1 89580042 GTA G

CM070405.1 89687082 GTCTA G

CM070405.1 90211219 CCTT C

CM070405.1 90926025 AAG A

CM070405.1 91374377 AGGG A

CM070405.1 91774822 A AAAAT

CM070405.1 91988540 AATATAT A

CM070405.1 92100928 GGAA G

CM070405.1 93325335 G GTTTTT

CM070405.1 93520619 TTA T

CM070405.1 93624323 A AT

CM070405.1 93729583 CAAAG C

CM070405.1 94405238 GAAGA G

CM070405.1 94634544 GCC G

CM070405.1 96764658 ACT A

CM070405.1 96962384 G GGT

CM070405.1 97208972 GCT G

CM070405.1 97302649 TTC T

CM070405.1 97313613 T TC

CM070405.1 98052703 AAGAAG A

CM070405.1 98157423 C CAGAA

CM070405.1 98450417 GAGA G

CM070405.1 99074188 TCTC T

CM070405.1 99191175 G GT

CM070405.1 99432447 T C

CM070405.1 99613008 GGA G

CM070405.1 99919534 A AT

CM070405.1 100316208 GAAGA G

CM070405.1 100423917 AAG A

CM070405.1 100611096 AAG A

CM070405.1 101083925 CG C

CM070405.1 101997716 TC T

CM070405.1 102305293 GAT G

CM070405.1 102701516 CG C

CM070405.1 103053602 T TTC

CM070405.1 103748747 TGA T

CM070405.1 104465774 C CA

CM070405.1 104491458 G GT

CM070405.1 104532264 TC T

CM070405.1 105020926 GCA G

CM070405.1 105030284 AC A

CM070405.1 105558858 TTC T

CM070405.1 105559406 TTCTC T

CM070405.1 106508481 TGC T

CM070405.1 107369773 A AG

CM070405.1 107521305 C CCTCTT

CM070405.1 108176377 T C

CM070405.1 108176383 T C

CM070405.1 108177560 TTAGG T

CM070405.1 108181887 GT G

CM070406.1 375757 ACT A

CM070406.1 867217 C CTTTTTTTTTTTTT

CM070406.1 904266 ATCT A

CM070406.1 1105782 TCC T

CM070406.1 1318406 AGAAG A

CM070406.1 1382948 TG T

CM070406.1 1987296 C CT

CM070406.1 2092458 TATA T

CM070406.1 2264868 A G

CM070406.1 2264869 G A

CM070406.1 2562455 TCC T

CM070406.1 2582338 C CT

CM070406.1 3343494 C CAAAAAAA

CM070406.1 3436198 C CTTTTTTT

CM070406.1 3453068 C CTTTTTTTT

CM070406.1 3940721 G GTCTA

CM070406.1 4758638 GAGA G

CM070406.1 4788437 C CTTTTTTTTTTTTTTTTTTTTTT

CM070406.1 5693410 C CTT

CM070406.1 5897599 TG T

CM070406.1 6099120 AAAG A

CM070406.1 7959269 TGA T

CM070406.1 8551409 C CAT

CM070406.1 8632906 TTATC T

CM070406.1 8905503 G C

CM070406.1 9381831 GGAA G

CM070406.1 9589533 T TTA

CM070406.1 9867911 AT A

CM070406.1 9905539 CATT C

CM070406.1 10017061 C CATAT

CM070406.1 10023169 AC A

CM070406.1 10441015 CGAGA C

CM070406.1 10457855 TTC T

CM070406.1 11141590 C G

CM070406.1 11314060 TTC T

CM070406.1 11613075 G GGATA

CM070406.1 11713222 TTC T

CM070406.1 11941272 CTT C

CM070406.1 11954067 C CTTTTTTT

CM070406.1 12246255 TC T

CM070406.1 12518258 A AG

CM070406.1 13493830 TGA T

CM070406.1 14116372 TTTA T

CM070406.1 14268279 GGT G

CM070406.1 14364967 GGA G

CM070406.1 14572399 CAT C

CM070406.1 15254754 GTC G

CM070406.1 15413340 GAAGA G

CM070406.1 16617897 AAAGG A

CM070406.1 16978614 G GAGA

CM070406.1 17920097 GC G

CM070406.1 18293404 C CA

CM070406.1 18782383 AGTGT A

CM070406.1 19056856 CCT C

CM070406.1 19944537 CT C

CM070406.1 20060027 A T

CM070406.1 20102247 G GTTC

CM070406.1 20455090 C A

CM070406.1 20735719 CCTCT C

CM070406.1 21151620 TCTC T

CM070406.1 21542210 TTTC T

CM070406.1 23865700 G GTCTCTCTCTCTCTCTCTC

CM070406.1 24192019 AGAG A

CM070406.1 24625512 CAAG C

CM070406.1 25039958 TTC T

CM070406.1 26183470 A AATAT

CM070406.1 26421256 CCTTT C

CM070406.1 26605605 AG A

CM070406.1 26605608 GAGGAA G

CM070406.1 27941364 C CAAA

CM070406.1 28053538 CAG C

CM070406.1 28437900 A AAT

CM070406.1 29882361 AG A

CM070406.1 30447942 TTC T

CM070406.1 30603060 A ATATC

CM070406.1 31373433 GAGA G

CM070406.1 32023702 CAT C

CM070406.1 32359262 T TC

CM070406.1 33389169 GCT G

CM070406.1 33551952 TCTC T

CM070406.1 33588117 T C

CM070406.1 33646947 GTA G

CM070406.1 34667936 C CAT

CM070406.1 34802005 GGA G

CM070406.1 35229678 ATC A

CM070406.1 36803011 TTCTC T

CM070406.1 37405129 ATC A

CM070406.1 38280251 GGA G

CM070406.1 38635292 G GTA

CM070406.1 38728973 C CA

CM070406.1 39324683 AAC A

CM070406.1 39493995 G GAC

CM070406.1 39528623 T A

CM070406.1 39528624 T A

CM070406.1 39977918 GGAA G

CM070406.1 40218915 GTATA G

CM070406.1 40501777 G GAGAA

CM070406.1 42242652 A T

CM070406.1 42845315 T A

CM070406.1 43770704 CTCT C

CM070406.1 45298152 T A

CM070406.1 47111306 T TC

CM070406.1 47867332 TTC T

CM070406.1 48588261 CAT C

CM070406.1 48779271 A AT

CM070406.1 48994121 G GTTTTT

CM070406.1 49115490 C CTCT

CM070406.1 49302473 C CAGAG

CM070406.1 50913646 GGA G

CM070406.1 51388655 TGC T

CM070406.1 52872113 C CAAAAAAAAAAAAAA

CM070406.1 53532540 G GA

CM070406.1 54722172 TGC T

CM070406.1 55431206 TTC T

CM070406.1 56014274 TCA T

CM070406.1 56505919 TTC T

CM070406.1 56745899 A G

CM070406.1 56745941 C T

CM070406.1 56745957 G T

CM070406.1 56745960 A T

CM070406.1 56745964 A T

CM070406.1 56745972 T A

CM070406.1 56745978 C T

CM070406.1 56977576 TTC T

CM070406.1 57538411 C A

CM070406.1 57890287 GAC G

CM070406.1 57989645 GTTCTTC G

CM070406.1 58452418 GAGA G

CM070406.1 58552466 A AG

CM070406.1 60121207 TGAA T

CM070406.1 60221722 CCT C

CM070406.1 60574205 CCT C

CM070406.1 61137864 CCT C

CM070406.1 62653899 G GTTTTTTTTTTTTTTTTTTTTTTTTT

CM070406.1 62785958 TTC T

CM070406.1 62811656 AG A

CM070406.1 62811658 AG A

CM070406.1 63519570 G A

CM070406.1 63519598 GAGA G

CM070406.1 63826266 C CA

CM070406.1 63866908 CG C

CM070406.1 64590242 T TGATA

CM070406.1 64807664 TGC T

CM070406.1 65197612 TGC T

CM070406.1 66121903 T TTATATA

CM070406.1 66330083 CA C

CM070406.1 67475173 G GGATA

CM070406.1 68104634 A AAGAAT

CM070406.1 68251079 TTATC T

CM070406.1 69363028 T TCTCTCC

CM070406.1 70300424 TTC T

CM070406.1 71629607 C CTATATATA

CM070406.1 73279925 AC A

CM070406.1 73469072 TC T

CM070406.1 74796208 TTC T

CM070406.1 74928920 G GAGGA

CM070406.1 75024194 C CT

CM070406.1 75064057 GGA G

CM070406.1 75622326 G GTTTT

CM070406.1 76486031 G GT

CM070406.1 76832311 CAG C

CM070406.1 77124350 TTA T

CM070406.1 78265619 GCT G

CM070406.1 78277943 TAC T

CM070406.1 78629429 T TTATC

CM070406.1 78629549 TTATC T

CM070406.1 78704071 AAGAG A

CM070406.1 78861967 GGA G

CM070406.1 79034156 A ATG

CM070406.1 79339364 TTAA T

CM070406.1 79707618 GAGA G

CM070406.1 79790298 GAC G

CM070406.1 79931795 A AAC

CM070406.1 80121494 G GAT

CM070406.1 80249755 T TGAC

CM070406.1 80513254 G GAGA

CM070406.1 80959275 C CAGAGAG

CM070406.1 81135186 AATAG A

CM070406.1 82228760 C CATAT

CM070406.1 82520369 C CCTAT

CM070406.1 82743636 GCACGCACC G

CM070406.1 84341026 AGGAG A

CM070406.1 84388642 C G

CM070406.1 84388643 G T

CM070406.1 84440482 AG A

CM070406.1 84714465 C CT

CM070406.1 84875452 T TAAAAAAAAAAAAAAAAAAA

CM070406.1 85016515 CAG C

CM070406.1 85825393 AGTGT A

CM070406.1 86922914 GAGA G

CM070406.1 87504042 GTAGA G

CM070406.1 87504144 G GTAGA

CM070406.1 88148945 TTTCC T

CM070406.1 88777779 T TGAA

CM070406.1 88792861 GGA G

CM070406.1 89541269 G GAAAGA

CM070406.1 89612843 AGC A

CM070406.1 89720060 C CCT

CM070406.1 90076653 AATATAT A

CM070406.1 90335038 GTTTC G

CM070406.1 90343438 T TTCTC

CM070406.1 90646113 A AGAG

CM070406.1 90902191 AGAG A

CM070406.1 91421413 TC T

CM070407.1 1260730 CGG C

CM070407.1 1497213 CG C

CM070407.1 2353109 T C

CM070407.1 2751892 CT C

CM070407.1 3819427 C CAAAAAAAAAAAAA

CM070407.1 4759747 CAG C

CM070407.1 4932163 A AG

CM070407.1 6566847 GTC G

CM070407.1 6656856 G GTTT

CM070407.1 7331545 GGA G

CM070407.1 7901979 G GTAGA

CM070407.1 7922614 C CAGA

CM070407.1 7977009 C CCT

CM070407.1 9530003 GTAT G

CM070407.1 9774362 C CTGTG

CM070407.1 11067037 CT C

CM070407.1 12643517 CG C

CM070407.1 13028175 CG C

CM070407.1 13156951 ATG A

CM070407.1 13991286 CCTTT C

CM070407.1 14144276 C CTTTT

CM070407.1 14408126 TTG T

CM070407.1 14460301 TTG T

CM070407.1 15692038 CGGG C

CM070407.1 16669542 GCCC G

CM070407.1 16820100 GTC G

CM070407.1 17045431 TATAG T

CM070407.1 17490335 AAC A

CM070407.1 17732817 CT C

CM070407.1 18054490 CCT C

CM070407.1 18342773 AC A

CM070407.1 18416338 C CTTT

CM070407.1 18602232 T TTTA

CM070407.1 19552937 TTA T

CM070407.1 21382366 TG T

CM070407.1 21699642 TGA T

CM070407.1 22530481 T TGATA

CM070407.1 22761021 C CTCCT

CM070407.1 22964164 ATTC A

CM070407.1 23294620 GAGAA G

CM070407.1 23862609 TGC T

CM070407.1 24984959 G GTTT

CM070407.1 25741279 TC T

CM070407.1 26751168 CCT C

CM070407.1 27398715 TC T

CM070407.1 27468582 TTC T

CM070407.1 27478187 GC G

CM070407.1 27554695 GTC G

CM070407.1 27705381 TTCTA T

CM070407.1 27715426 CCTAT C

CM070407.1 28638723 GGT G

CM070407.1 28705178 GCA G

CM070407.1 29095427 TGATA T

CM070407.1 29564881 CTCTA C

CM070407.1 30676040 CT C

CM070407.1 30981621 G GGA

CM070407.1 31425139 CAG C

CM070407.1 31429458 T G

CM070407.1 32851549 AC A

CM070407.1 33329935 CGT C

CM070407.1 33680065 G GAGAT

CM070407.1 33796623 CCT C

CM070407.1 33884797 C CTT

CM070407.1 33911967 GGA G

CM070407.1 34095285 CA C

CM070407.1 34201731 CATAT C

CM070407.1 35066311 CTCTT C

CM070407.1 35981189 GGA G

CM070407.1 36115629 CT C

CM070407.1 36271787 TTTTC T

CM070407.1 36447593 CTTCT C

CM070407.1 37101948 T TTA

CM070407.1 39213790 A AATAT

CM070407.1 40225129 GTAGA G

CM070407.1 40495552 C CTT

CM070407.1 40815615 G GAGA

CM070407.1 41857687 GGTGT G

CM070407.1 41877401 C CAATA

CM070407.1 43969046 C A

CM070407.1 44820235 A C

CM070407.1 44941732 G C

CM070407.1 44976141 G A

CM070407.1 45303321 A T

CM070407.1 45868921 A C

CM070407.1 46126108 C A

CM070407.1 47353067 GGA G

CM070407.1 47560816 CAG C

CM070407.1 48578493 CTCTT C

CM070407.1 48601520 ATATG A

CM070407.1 48893316 TTC T

CM070407.1 48926051 T TTC

CM070407.1 51181287 GTC G

CM070407.1 51376587 A AG

CM070407.1 52253859 CCTTT C

CM070407.1 52894889 CAGT C

CM070407.1 53792458 AAG A

CM070407.1 54290509 C CT

CM070407.1 55181074 T TTATA

CM070407.1 55349427 A AAGG

CM070407.1 55638246 C CAAAAA

CM070407.1 56455652 CG C

CM070407.1 56593677 TC T

CM070407.1 57363687 T TATTC

CM070407.1 58269409 GGA G

CM070407.1 59193966 A AAG

CM070407.1 60894430 TG T

CM070407.1 63833950 GA G

CM070407.1 63833953 GAA G

CM070407.1 64246519 CAG C

CM070407.1 64816266 T TTC

CM070407.1 64883786 CG C

CM070407.1 64991588 GGATA G

CM070407.1 66062529 CCT C

CM070407.1 66401634 TTC T

CM070407.1 66843676 CCT C

CM070407.1 67113900 CT C

CM070407.1 67768528 AAG A

CM070407.1 67819769 ATCTC A

CM070407.1 68268597 TTCTC T

CM070407.1 68709805 TGC T

CM070407.1 69114149 TGAGAGA T

CM070407.1 69194198 TTC T

CM070407.1 69465521 TGC T

CM070407.1 70223026 A AT

CM070407.1 70777616 T C

CM070407.1 71796527 A AAT

CM070407.1 71986481 G GTTTTTTTTTTTTT

CM070407.1 72831046 C CT

CM070407.1 73228266 G GAGA

CM070407.1 73305079 AAC A

CM070407.1 73786189 G GGAGA

CM070407.1 73805071 TTC T

CM070407.1 74616434 C CCT

CM070407.1 75111458 C CAA

CM070407.1 75145289 GGA G

CM070407.1 75586399 T TTA

CM070407.1 75871686 CCT C

CM070407.1 76294607 GA G

CM070407.1 76706121 AGCT A

CM070407.1 77196421 T TTA

CM070407.1 77525766 GA G

CM070407.1 77527178 GTCT G

CM070407.1 77683188 GTA G

CM070407.1 78606601 A AT

CM070407.1 78613250 ATC A

CM070407.1 78715094 AAC A

CM070407.1 78837278 TCC T

CM070407.1 78965803 GGA G

CM070407.1 79261532 TGAAA T

CM070407.1 79451756 G GA

CM070407.1 79796182 C CTTTA

CM070407.1 79923168 GTCT G

CM070407.1 80148093 CG C

CM070407.1 81388918 G C

CM070407.1 81631944 ATCTC A

CM070407.1 82225653 C CCTT

CM070407.1 82227185 TCC T

CM070407.1 82397849 TTC T

CM070407.1 83001587 GCACA G

CM070407.1 83014316 GAGA G

CM070407.1 83061368 CTCTCTT C

CM070407.1 83785391 AG A

CM070407.1 83951772 GTC G

CM070407.1 83979594 A AGAG

CM070407.1 84549753 TTC T

CM070407.1 84676407 CCT C

CM070407.1 84682659 TGA T

CM070407.1 84684774 C G

CM070407.1 84708763 G GTTA

CM070407.1 85497920 CG C

CM070407.1 85528125 AAAAAG A

CM070407.1 85610962 AAGAT A

CM070407.1 85789567 CTCTT C

CM070407.1 86799206 GA G

CM070407.1 87289125 AAAT A

CM070407.1 87735815 TTC T

CM070407.1 87967957 A AGG

CM070407.1 88057814 G GTTTTTTTTTTTTTTTTTTTTTTTT

CM070407.1 88394170 G GTTTTTTTTTTTTTTTT

CM070407.1 88527014 CATCT C

CM070407.1 88528740 AAAC A

CM070407.1 88715241 CCT C

CM070407.1 88761975 TTTCTC T

CM070407.1 88936499 T TTC

CM070407.1 90080486 GA G

CM070407.1 90545594 T A

CM070407.1 91069618 A T

CM070407.1 91140236 CTG C

CM070407.1 91228330 C T

CM070407.1 91228332 T TA

CM070407.1 91427764 C A

CM070407.1 92493137 G A

CM070407.1 92853575 CTGTCTG C

CM070407.1 93141605 TTCTA T

CM070407.1 93193686 CAG C

CM070407.1 93293793 AAAT A

CM070407.1 93408057 G GAC

CM070408.1 193143 TTGTG T

CM070408.1 316289 T G

CM070408.1 316291 A T

CM070408.1 984632 CCT C

CM070408.1 1093752 TGA T

CM070408.1 1144936 GAGAGA G

CM070408.1 1240164 T TTG

CM070408.1 1776150 GCA G

CM070408.1 2241778 G GTTTTTTTTTTTTTTT

CM070408.1 2624985 TAGAG T

CM070408.1 3063918 G GAGAT

CM070408.1 4092715 AG A

CM070408.1 4211011 C CAAAAAAAAAAA

CM070408.1 4550792 C CCTAT

CM070408.1 4743210 TGA T

CM070408.1 4906472 GA G

CM070408.1 4939198 G GA

CM070408.1 4973269 ATC A

CM070408.1 5024710 T C

CM070408.1 5411815 GAGA G

CM070408.1 5472878 GGA G

CM070408.1 6675582 GGAAGAA G

CM070408.1 7303844 A ATC

CM070408.1 7815446 CCT C

CM070408.1 8576112 G GGA

CM070408.1 10484644 TTA T

CM070408.1 10682068 TTC T

CM070408.1 11746946 AAG A

CM070408.1 11792195 TC T

CM070408.1 12059049 TTA T

CM070408.1 13415693 C CATAT

CM070408.1 13575254 C CAT

CM070408.1 13638145 GGA G

CM070408.1 14757133 GAT G

CM070408.1 15163356 C CGATA

CM070408.1 15452345 TAC T

CM070408.1 16086988 T TAA

CM070408.1 16173606 T TTAGA

CM070408.1 16498926 A G

CM070408.1 16629330 TAC T

CM070408.1 17029833 GAGAA G

CM070408.1 17120297 T C

CM070408.1 17138497 CAG C

CM070408.1 17572676 TGA T

CM070408.1 17827812 ACT A

CM070408.1 17932600 T TTA

CM070408.1 18220128 TTC T

CM070408.1 18443631 G GTAAA

CM070408.1 18632939 CAG C

CM070408.1 18656378 G GATA

CM070408.1 18685171 TTC T

CM070408.1 20038122 GCT G

CM070408.1 20239602 C A

CM070408.1 20301874 GAGGA G

CM070408.1 20779472 GGAA G

CM070408.1 20830059 TTC T

CM070408.1 20894664 ATCT A

CM070408.1 20984786 CCT C

CM070408.1 20985463 T G

CM070408.1 20997343 GTATC G

CM070408.1 22784269 CAT C

CM070408.1 23275558 GTATA G

CM070408.1 23288133 T TC

CM070408.1 24296231 CGA C

CM070408.1 24615054 CAT C

CM070408.1 25269731 AAT A

CM070408.1 25378155 ATC A

CM070408.1 25728951 TG T

CM070408.1 25890423 GAGA G

CM070408.1 26038772 CATCT C

CM070408.1 26425984 TC T

CM070408.1 27268400 TGAGATA T

CM070408.1 27389678 A C

CM070408.1 27820996 GATCT G

CM070408.1 27931021 TG T

CM070408.1 28574237 CCTATCTAT C

CM070408.1 28579722 CT C

CM070408.1 28664942 TCCC T

CM070408.1 29224451 T TTA

CM070408.1 29555077 C CCT

CM070408.1 30251410 CG C

CM070408.1 30664353 CCT C

CM070408.1 31704609 GGA G

CM070408.1 32217603 AATAG A

CM070408.1 32501567 CCTTTCTTT C

CM070408.1 33976482 C CA

CM070408.1 34080969 TGATA T

CM070408.1 34463325 CG C

CM070408.1 34497035 CT C

CM070408.1 35044557 GAC G

CM070408.1 36111479 TTC T

CM070408.1 36744136 AGAAG A

CM070408.1 36970771 GTAGA G

CM070408.1 37072048 GGT G

CM070408.1 38761825 A T

CM070408.1 41208461 TGA T

CM070408.1 41326249 T TGATA

CM070408.1 42115673 GGA G

CM070408.1 42663563 CCTTT C

CM070408.1 42888882 CTCT C

CM070408.1 42888887 T TTC

CM070408.1 43259652 G GT

CM070408.1 43850450 GAGAT G

CM070408.1 44304009 GGAAA G

CM070408.1 44552460 G GAT

CM070408.1 44619595 C CAGA

CM070408.1 44674743 G GTA

CM070408.1 46562316 TTC T

CM070408.1 47226907 ATC A

CM070408.1 48717750 A AAGAT

CM070408.1 49147565 TTC T

CM070408.1 50065684 T TTC

CM070408.1 51738125 C CATAT

CM070408.1 51961927 C CTTTT

CM070408.1 52297100 CGG C

CM070408.1 52648634 GCTTT G

CM070408.1 53230603 C CAAAAAAAAAAAAAA

CM070408.1 53334888 ATC A

CM070408.1 53380893 C CATAT

CM070408.1 54127558 CTA C

CM070408.1 54265191 ATC A

CM070408.1 54480265 GCA G

CM070408.1 54554823 C CAT

CM070408.1 54831878 GTC G

CM070408.1 55181142 TGA T

CM070408.1 55726203 TGATA T

CM070408.1 55871435 ATC A

CM070408.1 55910552 C CAA

CM070408.1 56059244 AAT A

CM070408.1 56663733 A AATAT

CM070408.1 57405708 C CAAAAAAAAAAAAA

CM070408.1 57559954 AGTGT A

CM070408.1 58021023 AAG A

CM070408.1 58026000 GGA G

CM070408.1 58456462 G GGT

CM070408.1 58462246 G T

CM070408.1 58480779 GGGA G

CM070408.1 58920029 TTC T

CM070408.1 59266503 CCTCT C

CM070408.1 60014246 A AC

CM070408.1 60048696 AAAGAAGAAG A

CM070408.1 60876277 G GAGA

CM070408.1 62168575 TTC T

CM070408.1 62254943 CG C

CM070408.1 62500090 TTC T

CM070408.1 62531592 CTTA C

CM070408.1 63792145 G GTTTTTTTTTTTTTTTTTTT

CM070408.1 64010904 GGA G

CM070408.1 64079619 CTG C

CM070408.1 64145937 G GTTTTTTTTTT

CM070408.1 64430922 TC T

CM070408.1 65027303 A AT

CM070408.1 65202292 TA T

CM070408.1 65205319 T TTCTA

CM070408.1 65330896 AGT A

CM070408.1 65419838 T TCATC

CM070408.1 65724840 G GAGA

CM070408.1 66264001 CCT C

CM070408.1 66535203 C CTCTTCT

CM070408.1 66566178 TTC T

CM070408.1 66570876 CGA C

CM070408.1 66747399 CTCTTTCTT C

CM070408.1 66850100 CAG C

CM070408.1 66926943 G GTCTA

CM070408.1 68303027 C CAT

CM070408.1 69055366 T TC

CM070408.1 69055367 A C

CM070408.1 69320104 G GGATA

CM070408.1 69733920 TTTC T

CM070408.1 70168727 C CTTTTTTTTTTTTT

CM070408.1 70892409 A ATGTGTGTGTGTGT

CM070408.1 71133749 TC T

CM070408.1 71721601 ATCTC A

CM070408.1 71723934 A AG

CM070408.1 72241942 TTC T

CM070408.1 72441809 GA G

CM070408.1 72441812 AGG A

CM070408.1 73230026 A AT

CM070408.1 73280290 AAAGG A

CM070408.1 73280752 G GTAGA

CM070408.1 73774455 AAG A

CM070408.1 74103178 C T

CM070408.1 74211671 AC A

CM070408.1 74524646 G GTTCT

CM070408.1 74768326 CAG C

CM070408.1 75244031 GAGAA G

CM070408.1 75244073 A AAG

CM070408.1 75335785 CCT C

CM070408.1 75592963 AGAG A

CM070408.1 75985553 GC G

CM070408.1 76134967 CT C

CM070408.1 76498122 A C

CM070408.1 76639395 C CA

CM070408.1 78004082 G GA

CM070408.1 78634660 AAC A

CM070408.1 78920058 TTC T

CM070408.1 79020507 GC G

CM070408.1 79570614 C CAAA

CM070408.1 80063333 TTC T

CM070408.1 80612286 G GTTTTTTTTTT

CM070408.1 81414527 A AAGAG

CM070408.1 82675824 C CCTTT

CM070408.1 82954731 A AATAT

CM070408.1 83738030 A AG

CM070408.1 83836994 GGA G

CM070408.1 84320367 CCT C

CM070409.1 676545 TGC T

CM070409.1 1308848 GTCTC G

CM070409.1 2488766 A AAG

CM070409.1 2840375 C CAT

CM070409.1 3394718 G GA

CM070409.1 3734232 TTC T

CM070409.1 3738094 GGA G

CM070409.1 4809000 GTC G

CM070409.1 5005709 T TTA

CM070409.1 5030754 GAGA G

CM070409.1 5183050 TTTTC T

CM070409.1 5226338 TTC T

CM070409.1 5587318 CATATAT C

CM070409.1 6325731 AAG A

CM070409.1 6733578 CCTT C

CM070409.1 6933525 C CGGA

CM070409.1 6954727 T TC

CM070409.1 7061099 A C

CM070409.1 7369903 G GA

CM070409.1 7691461 G GGA

CM070409.1 7990471 G GGTGT

CM070409.1 8219628 TTTC T

CM070409.1 8590555 GAGAA G

CM070409.1 9106476 TG T

CM070409.1 9468145 ATCT A

CM070409.1 9635176 CTGTG C

CM070409.1 10546024 TTTC T

CM070409.1 10805977 GGA G

CM070409.1 11285360 A T

CM070409.1 11485382 C CCTT

CM070409.1 12022303 CG C

CM070409.1 12435798 CGT C

CM070409.1 12466098 GTC G

CM070409.1 12507527 T TAAAAAAA

CM070409.1 12778947 A ACT

CM070409.1 13315868 C CA

CM070409.1 13665710 C G

CM070409.1 16887938 CTTAT C

CM070409.1 17569318 A C

CM070409.1 17704759 T C

CM070409.1 18025462 C CA

CM070409.1 19137781 CTCT C

CM070409.1 19865588 C CTTTTTTTT

CM070409.1 20556591 T TA

CM070409.1 21472992 G C

CM070409.1 23472443 A C

CM070409.1 23472449 G A

CM070409.1 23846323 CGGGGGGGG C

CM070409.1 23846343 A G

CM070409.1 25513773 AAG A

CM070409.1 25530350 TGC T

CM070409.1 26306333 C CAAAG

CM070409.1 26759756 A ATC

CM070409.1 29973405 T TTC

CM070409.1 30465024 AAG A

CM070409.1 31247820 TTC T

CM070409.1 31444018 G GGA

CM070409.1 31547937 TTTC T

CM070409.1 31932370 C CAAA

CM070409.1 32065079 CT C

CM070409.1 33751331 TTAGA T

CM070409.1 33751399 TGATA T

CM070409.1 33790788 CCT C

CM070409.1 33895952 GT G

CM070409.1 33902605 GAC G

CM070409.1 34142764 GTAGATAGATAGA G

CM070409.1 34303075 A AGAAAG

CM070409.1 34354793 AAGAT A

CM070409.1 34404064 TGC T

CM070409.1 34481948 T TGATA

CM070409.1 34587312 GCTT G

CM070409.1 34981114 T TA

CM070409.1 35224188 GAGAT G

CM070409.1 35937087 A AATATAT

CM070409.1 36231741 C CA

CM070409.1 36423274 A AAAG

CM070409.1 36727222 T TTTTC

CM070409.1 37040557 GGA G

CM070409.1 37045076 GGA G

CM070409.1 37110371 C CAGAT

CM070409.1 37110472 GGATA G

CM070409.1 37127217 TTC T

CM070409.1 37746093 GTAATAA G

CM070409.1 37793884 C CAT

CM070409.1 37831794 A C

CM070409.1 38454864 GTC G

CM070409.1 38528415 CTTCT C

CM070409.1 40224920 GTA G

CM070409.1 40605539 GCC G

CM070409.1 40950571 AAAAG A

CM070409.1 40953110 TG T

CM070409.1 41382154 CG C

CM070409.1 41414095 GTTTC G

CM070409.1 41622618 C CAT

CM070409.1 42190477 TTTA T

CM070409.1 42207865 ATG A

CM070409.1 42257669 TCTTC T

CM070409.1 42739913 C CTT

CM070409.1 42842540 G T

CM070409.1 43094090 GAGA G

CM070409.1 43116300 CAG C

CM070409.1 43170919 GGA G

CM070409.1 43692604 AC A

CM070409.1 44159810 AC A

CM070409.1 44653116 AAG A

CM070409.1 46027345 CGT C

CM070409.1 46398752 GTC G

CM070409.1 46403613 CCTTTCTTTCTTT C

CM070409.1 46521790 T TTCTA

CM070409.1 46715063 CGT C

CM070409.1 46903907 CAGGA C

CM070409.1 47022130 T TTAGA

CM070409.1 47035083 ATC A

CM070409.1 47159499 CAGTT C

CM070409.1 47248170 C CAAAAAAAA

CM070409.1 47256441 TTTTC T

CM070409.1 47554147 TCTTCC T

CM070409.1 47987823 C CA

CM070409.1 48073330 AAC A

CM070409.1 48242015 A AAAT

CM070409.1 49372425 C CTAT

CM070409.1 49439213 GAAGA G

CM070409.1 49441670 G GGATA

CM070409.1 49550612 C CCTCT

CM070409.1 49616519 C A

CM070409.1 49710291 T TTAA

CM070409.1 49930736 AAGAT A

CM070409.1 50366883 G GATAA

CM070409.1 50867234 T TGA

CM070409.1 50905140 AAG A

CM070409.1 50908963 TTA T

CM070409.1 51107550 CAG C

CM070409.1 51484869 G A

CM070409.1 52407349 A G

CM070409.1 52408552 A AACAC

CM070409.1 52557408 CATAAA C

CM070409.1 52573462 GGA G

CM070409.1 52790973 G GTTTTTTTTTTTTTTTT

CM070409.1 52927006 C CTCCT

CM070409.1 53091627 GGA G

CM070409.1 53262931 GAGAT G

CM070409.1 53319434 G GAGAGA

CM070409.1 53384648 TTC T

CM070409.1 53442055 C CT

CM070409.1 53447191 GGAGA G

CM070409.1 53449244 TTCTC T

CM070409.1 53538835 G GGAGA

CM070409.1 53695207 ACG A

CM070409.1 53701715 T TGA

CM070409.1 54265221 TTC T

CM070409.1 54341025 CCT C

CM070409.1 55068973 GGAGA G

CM070409.1 55437259 GCA G

CM070409.1 55490604 G GGATA

CM070409.1 56055038 T C

CM070409.1 56100494 A AAAGG

CM070409.1 56676636 G GTTTTTTTT

CM070409.1 56773563 G GGTGTGTGTGTGT

CM070409.1 56935522 TGC T

CM070409.1 57071917 G GATCT

CM070409.1 57418557 G GTATA

CM070409.1 57565636 T TAAAAAAAA

CM070409.1 57711998 AAG A

CM070409.1 58412449 A AG

CM070409.1 58796528 ATC A

CM070409.1 59336738 C CTCTA

CM070409.1 59579576 GGAGA G

CM070409.1 59609262 CTA C

CM070409.1 60403677 AG A

CM070409.1 60433944 GAGA G

CM070409.1 60434849 GTTC G

CM070409.1 60489330 G GAT

CM070409.1 60852597 GCT G

CM070409.1 61059887 C CCTCT

CM070409.1 61214858 CCT C

CM070409.1 61344882 C CAAAA

CM070409.1 61349204 AATAGATAG A

CM070409.1 61463832 AATAG A

CM070409.1 61682726 TGAG T

CM070409.1 61703903 CTCT C

CM070409.1 61713086 CAG C

CM070409.1 61777100 CCT C

CM070409.1 61983520 A ATC

CM070409.1 62073513 C CT

CM070409.1 62204054 CG C

CM070409.1 62334494 G GGA

CM070409.1 62570266 TGA T

CM070409.1 62674762 GGAGA G

CM070409.1 62964988 TTC T

CM070409.1 62981695 C CATCT

CM070409.1 63719511 CCT C

CM070409.1 63732063 TC T

CM070409.1 63781939 A AT

CM070409.1 63951923 GCT G

CM070409.1 64032545 G GT

CM070409.1 64083859 G GATA

CM070409.1 64140958 G GAT

CM070409.1 64256882 A AATAG

CM070409.1 64411638 G GGA

CM070409.1 64735982 C CTTT

CM070409.1 64854025 CG C

CM070409.1 65520851 GATA G

CM070409.1 65520855 T TGGC

CM070409.1 65520858 C G

CM070409.1 65520868 A C

CM070409.1 65520870 C T

CM070409.1 65520872 T G

CM070409.1 65526826 G C

CM070409.1 65991457 GCT G

CM070409.1 66291795 TC T

CM070409.1 66371541 G GGAAA

CM070409.1 66552442 T TA

CM070409.1 66891812 C CA

CM070409.1 66977442 CTTCT C

CM070409.1 67824577 TC T

CM070409.1 68005579 T TGAAA

CM070409.1 68036101 C CT

CM070409.1 68252775 C CA

CM070409.1 69074966 C CAAAAAAAAAAAAA

CM070409.1 69105592 C CAT

CM070409.1 69386083 TCC T

CM070409.1 69386501 C CT

CM070409.1 69639083 CT C

CM070409.1 69692759 A AAGAG

CM070409.1 71626040 AG A

CM070409.1 71720672 TG T

CM070409.1 71721215 TCCTCCC T

CM070409.1 71964772 T TTA

CM070409.1 72309606 ATC A

CM070409.1 72346401 AAGAG A

CM070409.1 72565018 CCT C

CM070409.1 72572166 C CATCT

CM070409.1 72717843 CAT C

CM070409.1 73141352 GGATA G

CM070409.1 73148215 AGG A

CM070409.1 74246008 GT G

CM070410.1 348690 A C

CM070410.1 1004944 GCT G

CM070410.1 1005764 AAG A

CM070410.1 1211130 TGA T

CM070410.1 1688799 ATC A

CM070410.1 2046262 TTC T

CM070410.1 2162971 AGAAG A

CM070410.1 2605766 GGA G

CM070410.1 2888883 T C

CM070410.1 3264364 GCC G

CM070410.1 3645413 C CT

CM070410.1 4488865 GAAGA G

CM070410.1 5096169 G T

CM070410.1 5104658 C CAAAAAAAAAAA

CM070410.1 5257206 T C

CM070410.1 5482507 TGA T

CM070410.1 5718036 CG C

CM070410.1 5791020 G GTTT

CM070410.1 6593931 CG C

CM070410.1 6715192 AC A

CM070410.1 7462428 CTTA C

CM070410.1 7511127 C CT

CM070410.1 7862852 C CAAAAA

CM070410.1 7954163 AG A

CM070410.1 7973474 TGC T

CM070410.1 8017352 GC G

CM070410.1 8079211 TC T

CM070410.1 8232546 C CA

CM070410.1 8844319 C CT

CM070410.1 8939733 G GACAC

CM070410.1 9318365 T TAGAC

CM070410.1 9451445 C CGGG

CM070410.1 9568952 G GCTC

CM070410.1 9774385 AAGG A

CM070410.1 9948969 C CTTT

CM070410.1 11005701 A AAT

CM070410.1 11267386 A AGAG

CM070410.1 11378208 A AAAAG

CM070410.1 11439170 ACCC A

CM070410.1 11454503 G GT

CM070410.1 11661662 CAG C

CM070410.1 11964860 GAGA G

CM070410.1 12388465 TG T

CM070410.1 13047758 CCT C

CM070410.1 13065574 GAAGA G

CM070410.1 13082182 C CAAAAAAAAAAAAA

CM070410.1 13447144 GGA G

CM070410.1 13463705 T TTC

CM070410.1 13989268 C CA

CM070410.1 14076167 ACTCT A

CM070410.1 14109448 T TAAA

CM070410.1 14312777 C CATATATAT

CM070410.1 14792016 CGA C

CM070410.1 14856813 AG A

CM070410.1 15182317 AAAT A

CM070410.1 16014425 GGA G

CM070410.1 16094404 TTTA T

CM070410.1 16421169 ATC A

CM070410.1 16512189 CG C

CM070410.1 16945779 TGATA T

CM070410.1 17152625 TG T

CM070410.1 18052285 G GGATA

CM070410.1 18705257 GGA G

CM070410.1 18987736 GTCTC G

CM070410.1 19115673 AAGAG A

CM070410.1 19191178 GAGA G

CM070410.1 19206539 G A

CM070410.1 19426444 GTGT G

CM070410.1 19500466 T TA

CM070410.1 19550769 TTC T

CM070410.1 19633607 G A

CM070410.1 19655513 CAGAG C

CM070410.1 19708092 TTC T

CM070410.1 19743489 TCACA T

CM070410.1 19987855 G GGA

CM070410.1 20733378 TGC T

CM070410.1 20968565 A G

CM070410.1 20968577 A G

CM070410.1 20970521 G GAGAGAC

CM070410.1 21267246 G GGAA

CM070410.1 22010732 TCC T

CM070410.1 23038839 A T

CM070410.1 23134623 C CA

CM070410.1 23382707 C CAT

CM070410.1 23486856 A AATCT

CM070410.1 23555690 C CA

CM070410.1 23691819 A AATAG

CM070410.1 23800606 AG A

CM070410.1 23800608 ACAAGAAG A

CM070410.1 24362484 ATC A

CM070410.1 24676174 A AATT

CM070410.1 24677896 A AACAT

CM070410.1 25149623 TC T

CM070410.1 25301361 CTCT C

CM070410.1 25453091 AC A

CM070410.1 25758638 GGA G

CM070410.1 25868091 A T

CM070410.1 26063771 A G

CM070410.1 26328166 A T

CM070410.1 27759955 G GAATA

CM070410.1 29159436 C T

CM070410.1 29461814 G GGATAGATA

CM070410.1 29474080 G GTCTA

CM070410.1 29704450 T TTTC

CM070410.1 30011868 G GTT

CM070410.1 30175253 CT C

CM070410.1 30311884 CG C

CM070410.1 30576463 A AAAG

CM070410.1 30815585 T TTGGA

CM070410.1 31281921 GTC G

CM070410.1 31575203 A AT

CM070410.1 31727649 ATC A

CM070410.1 32411564 GGAGA G

CM070410.1 32828933 TTCC T

CM070410.1 33174519 G T

CM070410.1 34079801 ATC A

CM070410.1 34594233 CAT C

CM070410.1 35605327 CAG C

CM070410.1 35665897 C CTA

CM070410.1 35764426 T A

CM070410.1 36189753 GTTAT G

CM070410.1 36275297 GGAA G

CM070410.1 36436675 CATT C

CM070410.1 36943085 CG C

CM070410.1 37714267 G GGA

CM070410.1 38827303 A T

CM070410.1 39117172 T G

CM070410.1 39249251 ATG A

CM070410.1 39674095 C CATCT

CM070410.1 39734089 GAGA G

CM070410.1 40534926 AAG A

CM070410.1 40636282 GAT G

CM070410.1 40671630 A AAT

CM070410.1 40767745 C A

CM070410.1 40771645 G T

CM070410.1 41140344 AAG A

CM070410.1 41681835 T TAAGAAG

CM070410.1 42120851 G GTT

CM070410.1 42249842 CGG C

CM070410.1 42347472 GGA G

CM070410.1 42903756 GGAGA G

CM070410.1 43033408 TGATA T

CM070410.1 43133930 CAAAT C

CM070410.1 43207254 TTC T

CM070410.1 43724159 CAGAT C

CM070410.1 43920331 CAT C

CM070410.1 43970317 AAAAT A

CM070410.1 44073159 C A

CM070410.1 44153467 G A

CM070410.1 44643992 C CAA

CM070410.1 44738884 G T

CM070410.1 44738885 A G

CM070410.1 44852042 C CAT

CM070410.1 44912237 G GAGAAGA

CM070410.1 45284473 CCT C

CM070410.1 45635013 C T

CM070410.1 45682236 TTC T

CM070410.1 45721185 A ATATC

CM070410.1 46015888 G GGAA

CM070410.1 46448105 TATAG T

CM070410.1 46701308 TC T

CM070410.1 47028202 C CAGAT

CM070410.1 47121760 TTC T

CM070410.1 47617702 TGA T

CM070410.1 48350375 CCT C

CM070410.1 48451292 TTC T

CM070410.1 50086743 GGAAA G

CM070410.1 50781414 GTC G

CM070410.1 50806175 C CAAAAAAAAAAA

CM070410.1 51063096 CCTT C

CM070410.1 51246052 CAG C

CM070410.1 52142959 T TAAGA

CM070410.1 52374410 G GAT

CM070410.1 52594087 CCT C

CM070410.1 53148911 GGA G

CM070410.1 53563327 C CT

CM070410.1 53738430 G GAT

CM070410.1 54205777 CCT C

CM070410.1 54401116 CCT C

CM070410.1 54880089 GGA G

CM070410.1 55108181 T TA

CM070410.1 55705043 ATC A

CM070410.1 55742577 C CT

CM070410.1 56016169 GGGTTA G

CM070411.1 20320 CT C

CM070411.1 426852 T TTA

CM070411.1 560882 G GAGA

CM070411.1 611040 TCCC T

CM070411.1 805901 GGAA G

CM070411.1 823933 C CA

CM070411.1 1361697 G T

CM070411.1 1436023 AAT A

CM070411.1 1515624 T A

CM070411.1 1515684 A C

CM070411.1 1516807 G A

CM070411.1 1601895 C A

CM070411.1 1841069 A G

CM070411.1 1841086 A C

CM070411.1 1841087 T A

CM070411.1 1841095 A T

CM070411.1 3267068 TGA T

CM070411.1 3739658 GGAA G

CM070411.1 3845919 CGGG C

CM070411.1 4118378 TGG T

CM070411.1 4554178 TAC T

CM070411.1 5218198 TCACA T

CM070411.1 5261757 TTTC T

CM070411.1 5417721 A AAT

CM070411.1 5504600 TTATATATA T

CM070411.1 5658380 TC T

CM070411.1 5766039 A AAAAT

CM070411.1 6405813 CTCT C

CM070411.1 6426128 AT A

CM070411.1 6838941 T TTC

CM070411.1 6871691 TTC T

CM070411.1 7109933 G GA

CM070411.1 7347370 TGA T

CM070411.1 7666420 C CAAAAAAAAAAAA

CM070411.1 7955256 A C

CM070411.1 8134188 GCTCT G

CM070411.1 8136816 T TATAC

CM070411.1 9082720 AAG A

CM070411.1 9138969 C CTTTTTTTTTTTT

CM070411.1 9300761 G GT

CM070411.1 9588737 GAGA G

CM070411.1 10295504 G GTATA

CM070411.1 10852666 C CTTTTTTTTTTTTT

CM070411.1 10977847 T TTTCTTCTTC

CM070411.1 11015683 T A

CM070411.1 11065154 GCTCT G

CM070411.1 11888792 TCATA T

CM070411.1 12460631 G A

CM070411.1 12487260 CAG C

CM070411.1 12493250 TTC T

CM070411.1 12712995 CT C

CM070411.1 12830942 TCTC T

CM070411.1 12959061 GTTTC G

CM070411.1 13123014 GCA G

CM070411.1 13185043 GGAGAGA G

CM070411.1 13255744 A ATATC

CM070411.1 13335560 TG T

CM070411.1 13348711 GGA G

CM070411.1 13671222 ACG A

CM070411.1 13750999 G GGA

CM070411.1 14082269 TAG T

CM070411.1 14637034 TTC T

CM070411.1 14858813 C A

CM070411.1 15227809 TCA T

CM070411.1 15236905 CCT C

CM070411.1 15657854 CCT C

CM070411.1 15925410 GGATA G

CM070411.1 15930657 CCT C

CM070411.1 16554245 CCTT C

CM070411.1 16575641 AGAG A

CM070411.1 16657664 C T

CM070411.1 16657714 T A

CM070411.1 16661488 G A

CM070411.1 16661790 T G

CM070411.1 16664162 C A

CM070411.1 16697212 TCCTGCC T

CM070411.1 16703459 T TA

CM070411.1 16873148 G GC

CM070411.1 16873865 C A

CM070411.1 16878801 C A

CM070411.1 16945884 CAAGA C

CM070411.1 16995910 CT C

CM070411.1 17145437 C CA

CM070411.1 17621107 C CA

CM070411.1 18486271 GGA G

CM070411.1 19223239 CAG C

CM070411.1 19314341 GGGA G

CM070411.1 19463493 T TA

CM070411.1 19564211 A ATAT

CM070411.1 19725912 T TTC

CM070411.1 19894639 A AAC

CM070411.1 20436354 A T

CM070411.1 21170782 TGAGA T

CM070411.1 21171146 TTC T

CM070411.1 21225409 TGC T

CM070411.1 21439062 T TTG

CM070411.1 21613524 G GAT

CM070411.1 21715680 T TC

CM070411.1 21843403 C CT

CM070411.1 21843433 C CT

CM070411.1 22592346 CTCT C

CM070411.1 22806447 G GTTTTTTT

CM070411.1 23006222 GTC G

CM070411.1 23177899 TTC T

CM070411.1 23341368 G GA

CM070411.1 23354971 G GAGAA

CM070411.1 23393121 GTATA G

CM070411.1 23609569 TTC T

CM070411.1 23704862 G GAT

CM070411.1 23800479 GTC G

CM070411.1 24703377 T C

CM070411.1 24745645 GTC G

CM070411.1 24993237 G GGAGA

CM070411.1 25342731 C CCCAA

CM070411.1 25424968 GA G

CM070411.1 26021895 TTC T

CM070411.1 26564415 TAG T

CM070411.1 26577310 GTC G

CM070411.1 26596200 A AT

CM070411.1 26730260 G T

CM070411.1 26912133 TTC T

CM070411.1 26935439 T G

CM070411.1 26965802 T TTA

CM070411.1 27505889 GTCCA G

CM070411.1 27630870 T TTTC

CM070411.1 28655221 G GGA

CM070411.1 28800425 C CA

CM070411.1 28957408 GAGA G

CM070411.1 29071869 AGT A

CM070411.1 29072187 G A

CM070411.1 29821706 TTA T

CM070411.1 29842131 CAG C

CM070411.1 30013108 G GGTGT

CM070411.1 30170023 G GTCTA

CM070411.1 30190155 CAG C

CM070411.1 30240281 A AAT

CM070411.1 30240554 CAT C

CM070411.1 30630844 CTATT C

CM070411.1 30635667 GTC G

CM070411.1 30842805 CCTCTCT C

CM070411.1 31024726 GGA G

CM070411.1 31377298 CATAG C

CM070411.1 31469845 GCT G

CM070411.1 31801109 TTCTC T

CM070411.1 31835993 AG A

CM070411.1 31975560 TTATA T

CM070411.1 32158967 AAGAG A

CM070411.1 32374819 G A

CM070411.1 32439108 AG A

CM070411.1 32782610 G GAT

CM070411.1 32782680 CAT C

CM070411.1 32852249 C CATATATAT

CM070411.1 33077074 AAC A

CM070411.1 33212031 CGAGA C

CM070411.1 33258814 CCTT C

CM070411.1 33980699 G GAGA

CM070411.1 33982207 TTA T

CM070411.1 34342324 T TTTC

CM070411.1 34894443 C CGA

CM070411.1 35169380 T TGA

CM070411.1 35183702 GGA G

CM070411.1 35396377 C CTGT

CM070411.1 35418957 TGC T

CM070411.1 35444563 A AAGAG

CM070411.1 35489381 C CAG

CM070411.1 35583189 CAT C

CM070411.1 35594090 TTC T

CM070411.1 35595769 TAC T

CM070411.1 35600953 TAAAAAAAAAAAAAAAA T

CM070411.1 35624560 GGA G

CM070411.1 35788757 G GCTTT

CM070411.1 36002733 C CA

CM070411.1 36449471 TTC T

CM070411.1 36609652 G GAGA

CM070411.1 36666762 AATAT A

CM070411.1 36851385 A ATC

CM070411.1 36988680 G GCA

CM070411.1 37019780 A AAGAG

CM070411.1 37621874 TTTTC T

CM070411.1 37643393 C CT

CM070411.1 37767092 C A

CM070411.1 37837721 ATC A

CM070411.1 37897039 GGA G

CM070411.1 37923104 C CAT

CM070411.1 38177080 G GTATA

CM070411.1 38321232 C CCA

CM070411.1 38326244 TTC T

CM070411.1 38530171 AC A

CM070411.1 38804432 TTC T

CM070411.1 38809936 TTC T

CM070411.1 39149445 TGC T

CM070411.1 39322623 CAT C

CM070411.1 39650623 GGAGA G

CM070411.1 39727606 TAAAC T

CM070411.1 39824622 CTTCT C

CM070411.1 40005732 GTC G

CM070411.1 40018477 CAG C

CM070411.1 40081188 CAG C

CM070411.1 40097736 C CTATT

CM070411.1 40535506 C G

CM070411.1 40597338 TTCTCTC T

CM070411.1 41281338 GTC G

CM070411.1 41696964 A AC

CM070411.1 41892167 T TTG

CM070411.1 42512995 T TAAAAAAAAAA

CM070411.1 42559230 CCT C

CM070411.1 42737513 AATAT A

CM070411.1 42913380 G GAGA

CM070411.1 42931277 GAGA G

CM070411.1 43833847 CCT C

CM070411.1 44572031 AAAG A

CM070411.1 44648180 CAT C

CM070411.1 44727267 A C

CM070411.1 45013380 G GA

CM070411.1 45041981 ACTT A

CM070411.1 45348794 CAG C

CM070411.1 45362977 GTATA G

CM070411.1 45493850 AGT A

CM070411.1 45588136 T TATATA

CM070411.1 45811422 C CTCTT

CM070411.1 45879002 G GAT

CM070411.1 46185378 GAGAGAT G

CM070411.1 46399787 CCT C

CM070411.1 46500600 C CCTCT

CM070411.1 46543515 CCT C

CM070411.1 46613009 A T

CM070411.1 46745776 A AT

CM070411.1 46888561 GTA G

CM070411.1 47342808 GTA G

CM070411.1 47532093 C CT

CM070411.1 47626574 G A

CM070411.1 47796487 TTC T

CM070411.1 48090871 T TTATA

CM070411.1 48241182 A G

CM070411.1 48391373 ACG A

CM070411.1 48484278 G GA

CM070411.1 48503872 CAG C

CM070411.1 49246579 A AAC

CM070411.1 49277676 CT C

CM070411.1 49277680 CTT C

CM070411.1 49526613 C CTA

CM070411.1 49707516 C CAT

CM070411.1 50276349 CATAT C

CM070411.1 50729917 GATAT G

CM070411.1 50962837 TTC T

CM070411.1 51123389 CCTCT C

CM070411.1 51148455 ATC A

CM070411.1 51171293 TATA T

CM070411.1 51304382 T TTA

CM070411.1 51372490 GTCTCTC G

CM070411.1 51396451 CCTTT C

CM070411.1 51697158 CGA C

CM070411.1 51841744 TTA T

CM070411.1 52244809 G GTATT

CM070411.1 52309509 TTA T

CM070411.1 52601757 TTC T

CM070411.1 53106167 G GCACACA

CM070411.1 53482600 G GAGA

CM070411.1 53641174 CT C

CM070411.1 53641629 TG T

CM070411.1 53641634 TC T

CM070411.1 53641645 GT G

CM070411.1 53641658 ATT A

CM070411.1 53641670 GGA G

CM070411.1 53641680 AG A

CM070411.1 53641687 AT A

CM070411.1 53641710 TC T

CM070411.1 53644092 GT G

CM070411.1 53644102 AT A

CM070411.1 53644107 GC G

CM070411.1 53644116 AT A

CM070411.1 53644123 TA T

CM070411.1 53644129 TA T

CM070411.1 53644135 GT G

CM070411.1 53644697 TA T

CM070411.1 53644754 TG T

CM070411.1 53644765 CT C

CM070411.1 53644798 TA T

CM070411.1 53644887 GT G

CM070411.1 53644893 GT G

CM070411.1 53644941 AT A

CM070411.1 53644957 GT G

CM070411.1 53645067 GT G

CM070411.1 53645071 GA G

CM070411.1 53645079 CA C

CM070411.1 53645091 GA G

CM070411.1 53645097 TTC T

CM070411.1 53645124 GT G

CM070411.1 53645141 CA C

CM070411.1 53645153 TG T

CM070411.1 53645171 AT A

CM070411.1 53645209 AT A

CM070411.1 53645240 GTT G

CM070411.1 53645259 TC T

CM070411.1 53645277 GT G

CM070411.1 53645295 TTC T

CM070411.1 53645371 CA C

CM070411.1 53645378 GT G

CM070411.1 53645387 TA T

CM070411.1 53645400 GA G

CM070411.1 53645414 AT A

CM070411.1 53645434 GA G

CM070411.1 53645449 CT C

CM070411.1 53645457 TA T

CM070411.1 53645479 AT A

CM070411.1 53645500 AG A

CM070411.1 53645530 TC T

CM070411.1 53645540 AT A

CM070411.1 53647220 AT A

CM070411.1 53647238 GT G

CM070411.1 53647260 GT G

CM070411.1 53647289 GT G

CM070411.1 53647309 AG A

CM070411.1 53647320 TA T

CM070411.1 53647331 TG T

CM070411.1 54300532 G GA

CM070411.1 54441247 C CAT

CM070411.1 54983710 ATG A

CM070411.1 55043004 CAG C

CM070411.1 55378230 C CCTCT

CM070411.1 55567421 TC T

CM070411.1 55568138 AGT A

CM070411.1 55802794 AAGG A

CM070411.1 56531614 AAG A

CM070411.1 56643638 TG T

CM070411.1 56974512 G GTTTTT

CM070411.1 57001975 C CT

CM070411.1 57598660 A AAGAT

CM070411.1 57623564 AAAG A

CM070411.1 58213995 CAT C

CM070411.1 58353897 TTG T

CM070411.1 58432570 C CAT

CM070411.1 58617953 CAG C

CM070411.1 58621865 G GGA

CM070411.1 59405353 T C

CM070411.1 59407180 TTC T

CM070411.1 59483653 C CTTTTTTTTTTTTT

CM070411.1 59527772 CA C

CM070411.1 59637139 T TTA

CM070411.1 60000032 GTC G

CM070411.1 60027335 CCT C

CM070411.1 60048095 TTG T

CM070411.1 60245799 C CCT

CM070411.1 60369678 G GT

CM070411.1 60859369 C A

CM070411.1 61186598 CCT C

CM070411.1 61579469 CATT C

CM070411.1 61919164 TTC T

CM070411.1 61945379 GGT G

CM070411.1 62190183 C CG

CM070411.1 62631664 A ATG

CM070411.1 62894193 CA C

CM070411.1 62989737 GGA G

CM070411.1 63841241 ATC A

CM070411.1 64026992 T TC

CM070411.1 64121275 GGA G

CM070411.1 64366362 T G

CM070411.1 64866088 GAC G

CM070411.1 65142401 CAG C

CM070411.1 65587797 C CA

CM070411.1 66148662 T TTTTC

CM070411.1 66262964 CATCT C

CM070411.1 66289822 C G

CM070411.1 66289840 A C

CM070411.1 66327951 CAT C

CM070411.1 66962112 CCT C

CM070411.1 67327272 CA C

CM070411.1 67360514 TTCTC T

CM070411.1 67534335 GCTCT G

CM070411.1 67823978 A ATGGG

CM070411.1 67873189 GGAGA G

CM070411.1 68391502 ATC A

CM070411.1 68675091 G GGA

CM070411.1 68840287 CAGAG C

CM070411.1 68963260 G GT

CM070411.1 68996383 TTC T

CM070411.1 69000771 CT C

CM070411.1 69000773 CCCT C

CM070411.1 69111190 AAGAGAG A

CM070411.1 69381871 A AAC

CM070411.1 70151973 T TC

CM070411.1 71162389 GGA G

CM070411.1 71266631 GGAGA G

CM070411.1 71666738 AAG A

CM070411.1 71685442 C CT

CM070411.1 71968403 CAG C

CM070411.1 72250121 TGG T

CM070411.1 72639605 TTC T

CM070411.1 72715150 TGAGA T

CM070411.1 72722985 GCTT G

CM070411.1 72745048 AATTT A

CM070411.1 72759109 ACTT A

CM070411.1 73026181 CCCTCT C

CM070411.1 73141108 G GCA

CM070411.1 73523887 GTC G

CM070411.1 73558429 CCTTT C

CM070411.1 73624170 TTTTC T

CM070411.1 73660523 G GGA

CM070411.1 73916437 CCTCTCT C

CM070411.1 73924338 GGAGA G

CM070411.1 74570900 AATAG A

CM070411.1 74980096 A AATATAT

CM070411.1 75100406 CCTTT C

CM070411.1 75467954 CTCTT C

CM070411.1 75686324 G A

CM070411.1 75858497 GGAGA G

CM070411.1 75928100 G GAT

CM070411.1 75952829 TTATA T

CM070411.1 75964040 GTA G

CM070411.1 76145794 T TCTTC

CM070411.1 76305958 G GTTT

CM070411.1 76536735 G GATAT

CM070411.1 77190613 G GAT

CM070411.1 77354243 CA C

CM070411.1 77366826 GATAT G

CM070411.1 77626974 A AATAT

CM070411.1 77708656 TCA T

CM070411.1 77990819 TTCTC T

CM070411.1 78051547 TACAC T

CM070411.1 78400109 C CA

CM070411.1 78549297 TTTCTTC T

CM070411.1 78627857 ATATC A

CM070411.1 79283760 CCT C

CM070411.1 79915379 GTA G

CM070411.1 79993466 GGA G

CM070411.1 80184087 TGA T

CM070411.1 81740415 CATT C

CM070411.1 81813979 A AC

CM070411.1 82016310 G A

CM070411.1 82272808 TAGAA T

CM070411.1 82380401 C CATAG

CM070411.1 82949661 C CAT

CM070411.1 84279048 GAT G

CM070411.1 84400616 TTC T

CM070411.1 84984191 T TG

CM070411.1 85101762 G GAT

CM070411.1 85885198 CTCT C

CM070411.1 85952475 A AATAT

CM070411.1 86078994 GTC G

CM070411.1 86123187 T TTA

CM070411.1 86301363 GGAGA G

CM070411.1 86625695 G GA

CM070411.1 86705229 A AAT

CM070411.1 86753217 TTC T

CM070411.1 86986963 T G

CM070411.1 87188238 G GTAGA

CM070411.1 87860225 CTATA C

CM070411.1 88020684 G GAGA

CM070411.1 88046500 G GT

CM070411.1 88478152 C CT

CM070411.1 88497697 AAC A

CM070411.1 88569085 A AAT

CM070411.1 88613390 A AATAT

CM070411.1 88677536 ATATC A

CM070411.1 88847278 ATATT A

CM070411.1 90631747 AAGG A

CM070411.1 90930639 A AAT

CM070411.1 91336199 C CT

CM070411.1 91752234 T TACAC

CM070411.1 91752298 T G

CM070411.1 92566457 CCTCT C

CM070411.1 93149483 G GAT

CM070411.1 93646022 C CAT

CM070411.1 93802977 G GTATA

CM070411.1 94008446 TC T

CM070411.1 94332774 G GTA

CM070411.1 94398349 TTA T

CM070411.1 94900398 C A

CM070411.1 95031328 A AAG

CM070411.1 95450568 AAG A

CM070411.1 95582379 GAGAT G

CM070411.1 95787870 ATC A

CM070411.1 96201134 CATAT C

CM070411.1 96461771 GAT G

CM070411.1 96568969 C CT

CM070411.1 96701656 TCCC T

CM070411.1 96732654 GGA G

CM070411.1 97686880 G T

CM070411.1 97746548 CAT C

CM070411.1 97834998 CAG C

CM070411.1 97938709 A ATTT

CM070411.1 98014839 G T

CM070411.1 98570878 GATAT G

CM070411.1 98780186 GGA G

CM070411.1 98878055 G GTTTTTTTTTTTTTTTTTTTTTTTTTTTT

CM070411.1 99088038 T TTCTA

CM070411.1 99391887 TAC T

CM070411.1 99395017 GGAGA G

CM070411.1 99481544 C CTA

CM070411.1 99633851 GGA G

CM070411.1 100463942 ATG A

CM070411.1 101058429 ACTCT A

CM070411.1 101135178 AG A

CM070411.1 101455322 GT G

CM070411.1 101525354 ACTCT A

CM070411.1 101635520 G GAGA

CM070411.1 101838503 TTA T

CM070411.1 102102686 A G

CM070411.1 102248660 AAG A

CM070411.1 102430713 GCTCT G

CM070411.1 102538533 CCTTT C

CM070411.1 102623960 C CT

CM070411.1 102676988 T TAA

CM070411.1 102995889 T A

CM070411.1 102995901 A G

CM070411.1 102995902 A G

CM070411.1 103055815 C T

CM070411.1 103122636 C CCAGGGACACAGGGAGA

CM070411.1 103229159 G C

CM070411.1 103479941 G GT

CM070411.1 103536612 GGA G

CM070411.1 104247716 TTA T

CM070411.1 104827871 TTC T

CM070411.1 105248551 GAAGA G

CM070411.1 106037250 TG T

CM070411.1 106070520 G T

CM070411.1 106133931 GTAGA G

CM070411.1 106180195 TTC T

CM070411.1 106358991 CAGAAAGAA C

CM070411.1 106596880 G GA

CM070411.1 106770176 T TACAC

CM070411.1 106776543 TTC T

CM070411.1 107080208 GAAGA G

CM070411.1 107092991 GT G

CM070411.1 107176145 C CTG

CM070411.1 107282597 AAG A

CM070411.1 108123226 T TTC

CM070411.1 108334018 A AC

CM070411.1 108477312 TGC T

CM070411.1 108749159 T TTTC

CM070411.1 108823226 TAG T

CM070411.1 108823230 G T

CM070411.1 109018685 C T

CM070411.1 109018687 G A

CM070411.1 109039739 CG C

CM070411.1 109077326 TTTTA T

CM070411.1 109223598 TTG T

CM070411.1 109664397 CAG C

CM070411.1 109984375 A AAC

CM070411.1 110289462 TTC T

CM070411.1 110563316 TAC T

CM070411.1 110857257 TGA T

CM070411.1 110963220 A AAGAG

CM070411.1 110977940 T TAATA

CM070411.1 111335800 TCTC T

CM070411.1 111507812 C CT

CM070411.1 111610467 G GTA

CM070411.1 111799555 GGA G

CM070411.1 111908503 C CAT

CM070411.1 112114198 C CATAT

CM070411.1 112125850 TTC T

CM070411.1 112209020 GGT G

CM070411.1 113083878 AAG A

CM070411.1 113185104 T A

CM070411.1 113270040 CT C

CM070411.1 113514697 A C

CM070411.1 113739149 GTA G

CM070411.1 113739197 A G

CM070411.1 114471953 CAT C

CM070411.1 114509150 G A

CM070411.1 115009732 TCA T

CM070411.1 115282294 CA C

CM070411.1 115489095 ATCTC A

CM070411.1 115500814 GTA G

CM070411.1 115729080 CCT C

CM070411.1 115944216 AG A

CM070411.1 115944259 A AGG

CM070411.1 115982196 TTA T

CM070411.1 115996701 A AGAG

CM070411.1 116142245 TATA T

CM070411.1 116259025 A AT

CM070411.1 116397543 A AAAG

CM070411.1 116885523 CCT C

CM070411.1 116887984 CCTT C

CM070411.1 117110185 AAGAG A

CM070411.1 117127889 GCTT G

CM070411.1 117131532 G GTA

CM070411.1 117153265 CAG C

CM070411.1 117545769 T A

CM070411.1 117565655 TTC T

CM070411.1 117706554 GGA G

CM070411.1 118323682 ATC A

CM070411.1 118539495 AAC A

CM070411.1 118548296 CAG C

CM070411.1 118600214 TTC T

CM070411.1 119116832 T TATAG

CM070411.1 119968343 AAGAGAGAG A

CM070411.1 120215634 A AC

CM070411.1 120298325 A AAG

CM070411.1 120691755 A C

CM070411.1 120691761 G A

CM070411.1 120691766 A G

CM070411.1 120691770 T C

CM070411.1 120691782 A C

CM070411.1 120776258 ACG A

CM070411.1 120935374 C CA

CM070411.1 120971900 TTC T

CM070411.1 121277024 CTCT C

CM070411.1 121631173 A AG

CM070411.1 121863096 TGC T

CM070411.1 122010410 TTC T

CM070411.1 122018372 CCT C

CM070411.1 122313475 G GA

CM070411.1 122426519 G GTT

CM070411.1 122464066 TTCTC T

CM070411.1 122764845 AG A

CM070411.1 122887692 T TG

CM070411.1 123236537 GGA G

CM070411.1 123499242 TTC T

CM070411.1 123586813 AT A

CM070411.1 123690336 TGC T

CM070411.1 124151105 AAT A

CM070411.1 124410031 GGGAA G

CM070411.1 124753759 T TC

CM070411.1 125104399 AG A

CM070411.1 125131743 AGAG A

CM070411.1 125389750 C CT

CM070411.1 125532859 T TAC

CM070411.1 125592086 T TG

CM070411.1 125660116 GTC G

CM070411.1 125926708 TCCCC T

CM070411.1 126343802 CCA C

CM070411.1 126473952 AG A

CM070411.1 127251826 GGA G

CM070411.1 127891122 A ACT

CM070411.1 128063894 T TAAAA

CM070411.1 128222086 GAT G

CM070411.1 128374871 A ATG

CM070411.1 128421302 CCTT C

CM070411.1 128819614 CATCT C

CM070411.1 129105645 C CT

CM070411.1 129157303 C T

CM070411.1 129255366 G GA

CM070411.1 129287428 TGATA T

CM070411.1 129788010 G GTA

CM070411.1 130045460 C CATAT

CM070411.1 130451199 CCTCT C

CM070411.1 130516518 T TC

CM070411.1 130687863 G GTA

CM070411.1 130797950 TTC T

CM070411.1 130824179 GAC G

CM070411.1 130857326 T C

CM070411.1 131147634 GTCTC G

CM070411.1 131163952 T TA

CM070411.1 131414505 TGA T

CM070411.1 131634737 TTA T

CM070411.1 131801223 C CATAT

CM070411.1 131996149 ACT A

CM070411.1 132026436 GTCTCTC G

CM070411.1 132229153 TGA T

CM070411.1 132310977 AGAGGG A

CM070411.1 132386715 CAT C

CM070411.1 132604401 CT C

CM070411.1 132632592 AAC A

CM070411.1 132971772 ATATC A

CM070411.1 133333399 GA G

CM070411.1 133498947 C A

CM070411.1 133552678 ATC A

CM070411.1 133626998 GGTGT G

CM070411.1 133643386 C CAAAAAA

CM070411.1 133976280 AAT A

CM070411.1 134102665 A AAG

CM070411.1 134245546 TTC T

CM070411.1 134606406 CCTCT C

CM070411.1 134631075 CATAT C

CM070411.1 134994583 ATC A

CM070411.1 135001656 GGT G

CM070411.1 135067638 GGAA G

CM070411.1 135568447 ATC A

CM070411.1 135589829 CT C

CM070411.1 135855240 G GCT

CM070411.1 136025207 A G

CM070411.1 136048437 T TGAG

CM070411.1 136116721 TCC T

CM070411.1 136120838 GGA G

CM070411.1 136565218 TGAAA T

CM070411.1 136715712 CT C

CM070411.1 137776856 TG T

CM070411.1 137855464 ATC A

CM070411.1 138224644 GA G

CM070411.1 138225481 G A

CM070411.1 138225780 ATGGAGAGGAGAGGAGAGGATAGGAGAGGAGAGGATAGGGAATAGAGAGGAGAGGAGAGAAGAGGGAAGAGGGAGAGGAGAGGAGAGGAG A

CM070411.1 138226693 G A

CM070411.1 138232060 A G

CM070411.1 138232436 G A

CM070411.1 138232451 G A

CM070411.1 138232464 A C

CM070411.1 138241649 T A

CM070411.1 138241692 A AG

CM070411.1 138242067 A AG

CM070411.1 138316472 GAGAGGAGCGC G

CM070411.1 138319725 CGGAGA C

CM070411.1 138395386 GGA G

CM070411.1 138470633 TG T

CM070411.1 138473361 ATG A

CM070411.1 138667655 CAGAG C

CM070411.1 138732939 CAGAG C

CM070411.1 138851645 CAT C

CM070411.1 138866748 A AATAT

CM070411.1 138869674 TTC T

CM070411.1 139293038 ACATCATCATCAT A

CM070411.1 139390694 C CAT

CM070411.1 139710063 CA C

CM070411.1 140176195 G GAC

CM070411.1 140242780 C CATAT

CM070411.1 140369566 C CTTTTT

CM070411.1 140545068 TTC T

CM070411.1 140557428 AAAG A

CM070411.1 140587250 C T

CM070411.1 140587258 C T

CM070411.1 140695076 G GGA

CM070411.1 140720629 T TTC

CM070411.1 141336913 GAGA G

CM070411.1 141859730 A AAAAT

CM070411.1 142279452 G GTAGA

CM070411.1 142706747 CAG C

CM070411.1 142779955 ACG A

CM070411.1 142873954 GGAGAGA G

CM070411.1 142886386 G GCTCT

CM070411.1 142886624 G GGA

CM070411.1 142917245 T TG

CM070411.1 143086289 T TGA

CM070411.1 143110759 TTATATA T

CM070411.1 143973092 G T

CM070411.1 144325392 GAGA G

CM070411.1 144399849 G A

CM070411.1 144429611 CATAT C

CM070411.1 144651841 GGAA G

CM070411.1 144727879 C CT

CM070411.1 145075412 A AC

CM070411.1 145174921 A ACT

CM070411.1 145416324 C CG

CM070411.1 145974579 TTTA T

CM070411.1 146025225 CCT C

CM070411.1 146223927 GAT G

CM070411.1 147819830 G GTATC

CM070411.1 147977400 CTCTT C

CM070411.1 148035721 CATATAT C

CM070411.1 148521815 G GTA

CM070411.1 148541697 C CAAAAAAAAAAAAAAAAAAAAAAAAAAAAAAAA

CM070411.1 148654743 G T

CM070411.1 148913505 C CCTCTCTCT

CM070411.1 148990761 C CT

CM070411.1 149331848 G T

CM070411.1 149676924 C CT

CM070411.1 149730760 GGA G

CM070411.1 150021454 CG C

CM070411.1 150581316 GGA G

CM070411.1 150711781 TC T

CM070411.1 150724787 G GTTTA

CM070411.1 150910141 CCTTT C

CM070411.1 151114271 GGA G

CM070411.1 151583903 CTTCT C

CM070411.1 151643203 T TTA

CM070411.1 151713834 G GTC

CM070411.1 151986749 T TCA

CM070411.1 152327327 T TTAGA

CM070411.1 152742301 CAGAG C

CM070411.1 152901200 TC T

CM070411.1 152933050 AAT A

CM070411.1 153111990 C CAT

CM070411.1 154042193 TGA T

CM070411.1 154209826 C CT

CM070411.1 154235484 GA G

CM070411.1 154257795 AAG A

CM070411.1 154594198 CGA C

CM070411.1 155765364 T TTCTC

CM070411.1 155784734 C CT

CM070411.1 155989624 G A

CM070411.1 156043975 T TC

CM070411.1 156044781 T TC

CM070411.1 156049377 A AGAT

CM070411.1 156167471 T TG

CM070411.1 156198501 T TC

CM070411.1 156355610 TTC T

CM070411.1 156435433 ACG A

CM070411.1 156499139 TC T

CM070411.1 156742554 GGAA G

CM070411.1 157011209 AAC A

CM070411.1 157011632 C CA

CM070411.1 157690752 C CT

CM070412.1 1005660 T TCTC

CM070412.1 2359507 C CT

CM070412.1 2811742 A AAC

CM070412.1 3330712 T TCTTCTTCTC

CM070412.1 4273129 AGAGAGG A

CM070412.1 4569205 GATATAT G

CM070412.1 4620624 CAT C

CM070412.1 4659986 AAT A

CM070412.1 4712340 T TA

CM070412.1 4975043 A AATATAT

CM070412.1 5025591 T TTA

CM070412.1 5510593 A G

CM070412.1 5620696 ACTT A

CM070412.1 5656309 G GTATA

CM070412.1 5664370 C A

CM070412.1 5693690 GGAA G

CM070412.1 5694068 GAGA G

CM070412.1 5771853 AAT A

CM070412.1 6082083 CAT C

CM070412.1 6093027 GTATA G

CM070412.1 6617712 CAT C

CM070412.1 6919588 TAGAG T

CM070412.1 7066533 G GATA

CM070412.1 7080742 GTATATATATA G

CM070412.1 7373592 A AAT

CM070412.1 7388688 CAT C

CM070412.1 7650693 CAT C

CM070412.1 7655444 T TTTC

CM070412.1 7797200 GAT G

CM070412.1 8286022 AT A

CM070412.1 8541315 G GAAT

CM070412.1 8578263 GTTC G

CM070412.1 8930627 GGAGA G

CM070412.1 8953492 AAG A

CM070412.1 8994585 TGAGAGA T

CM070412.1 8995030 A G

CM070412.1 8996178 AAAGAAGAAGAAGAAGAAGAAGAG A

CM070412.1 9613917 T TGA

CM070412.1 9936583 CTATA C

CM070412.1 10091927 T TAC

CM070412.1 10134111 AT A

CM070412.1 10398519 C CTCT

CM070412.1 10617195 A AT

CM070412.1 10734315 GTA G

CM070412.1 11083913 A AATATAT

CM070412.1 11149938 TTA T

CM070412.1 11200575 C CATAT

CM070412.1 11336515 G GTATA

CM070412.1 11370163 C CAAAAAAAAAAAA

CM070412.1 11380687 C CATAT

CM070412.1 11415038 GAAT G

CM070412.1 11507129 CA C

CM070412.1 11582558 TA T

CM070412.1 11684641 CTA C

CM070412.1 11974099 G GT

CM070412.1 12007553 TGATA T

CM070412.1 12128500 C CCTT

CM070412.1 12313561 TTATA T

CM070412.1 12376974 AAT A

CM070412.1 12774562 CAT C

CM070412.1 12871163 A AT

CM070412.1 12901873 G GATAT

CM070412.1 12950666 T TC

CM070412.1 12988684 G GATATAT

CM070412.1 13055192 C CTA

CM070412.1 13327677 GAT G

CM070412.1 13396523 C CTATATATA

CM070412.1 13527652 CATAT C

CM070412.1 13725774 CAT C

CM070412.1 13911653 C CAT

CM070412.1 13962372 AATAT A

CM070412.1 13970973 GATA G

CM070412.1 14090646 C CAT

CM070412.1 14197530 TTC T

CM070412.1 14211656 T C

CM070412.1 14244074 G GAT

CM070412.1 14294132 CATAT C

CM070412.1 14317974 T TTG

CM070412.1 14338476 AAGGAGG A

CM070412.1 14508054 GTATA G

CM070412.1 14723613 A AAT

CM070412.1 14874082 C CCTT

CM070412.1 14874427 A C

CM070412.1 14874430 C G

CM070412.1 14874433 CT C

CM070412.1 14874437 T A

CM070412.1 14874463 C T

CM070412.1 14874475 C T

CM070412.1 14967912 C CCTT

CM070412.1 15078912 TTATA T

CM070412.1 15193043 GGA G

CM070412.1 15303231 GAT G

CM070412.1 15490244 GT G

CM070412.1 15659981 C CA

CM070412.1 15668650 G A

CM070412.1 15668669 TTA T

CM070412.1 15668673 T TAA

CM070412.1 15668687 T A

CM070412.1 15668691 T C

CM070412.1 15668698 G A

CM070412.1 15668704 T TA

CM070412.1 15668705 T A

CM070412.1 15668718 T A

CM070412.1 15668813 G T

CM070412.1 15668817 C T

CM070412.1 15668826 T A

CM070412.1 15668828 G A

CM070412.1 15668829 T A

CM070412.1 15668831 C A

CM070412.1 15668986 G A

CM070412.1 15668988 T G

CM070412.1 15668993 T A

CM070412.1 15915823 T TA

CM070412.1 16685304 TTAA T

CM070412.1 16765189 CAT C

CM070412.1 16803527 A ATATAT

CM070412.1 17072711 CAT C

CM070412.1 17519059 AAT A

CM070412.1 17607550 AATAT A

CM070412.1 17740940 C CATA

CM070412.1 17995823 T TTA

CM070412.1 18167990 A AAT

CM070412.1 18200579 TTATA T

CM070412.1 18323759 T G

CM070412.1 18351428 T TTTC

CM070412.1 18588862 C CTTCTTCTTCTTCTTCTTCTTCTTCTTCTTCTTCTTCTTCTTCTTCTTCTTCTTCTTCTT

CM070412.1 18726127 C CATAT

CM070412.1 18904962 GAT G

CM070412.1 19029831 CAGAG C

CM070412.1 19288586 A AAT

CM070412.1 19772489 CATAT C

CM070412.1 19813717 G GTTC

CM070412.1 20067800 CCTT C

CM070412.1 20287026 GATAT G

CM070412.1 20379522 CAT C

CM070412.1 20735939 T TTATA

CM070412.1 20865926 T TTA

CM070412.1 21076218 AATAT A

CM070412.1 21088436 CATAG C

CM070412.1 21118501 C CATAT

CM070412.1 21132553 G A

CM070412.1 21133640 G A

CM070412.1 21133880 TGAAGAA T

CM070412.1 21223959 GGAA G

CM070412.1 21240702 GTA G

CM070412.1 21359269 G GAT

CM070412.1 21858608 GTATATATATA G

CM070412.1 21937205 C CATT

CM070412.1 21963231 T TA

CM070412.1 22172899 A T

CM070412.1 22373900 T G

CM070412.1 22493631 CTA C

CM070412.1 22614856 T C

CM070412.1 22786463 G GGA

CM070412.1 22786549 GGAA G

CM070412.1 22806712 G GA

CM070412.1 22926418 C CATATAT

CM070412.1 23370106 GAT G

CM070412.1 23388923 TTATA T

CM070412.1 23633348 GATATAT G

CM070412.1 23655001 C CAT

CM070412.1 23724457 G GTA

CM070412.1 23895804 CAT C

CM070412.1 24306386 GTATA G

CM070412.1 24380874 T C

CM070412.1 24449497 C G

CM070412.1 24652308 AT A

CM070412.1 24808026 C T

CM070412.1 24956558 A T

CM070412.1 24996919 TA T

CM070412.1 25158775 CA C

CM070412.1 25237510 A T

CM070412.1 25340117 G GT

CM070412.1 25449297 CAT C

CM070412.1 25480286 T TAG

CM070412.1 25877722 G A

CM070412.1 25925182 T C

CM070412.1 26135233 CA C

CM070412.1 26470555 A AG

CM070412.1 26533756 CAT C

CM070412.1 26966682 A AATAT

CM070412.1 27306893 GATA G

CM070412.1 27402366 CAT C

CM070412.1 27522855 CATAT C

CM070412.1 27623515 A G

CM070412.1 27623577 A G

CM070412.1 27742240 A G

CM070412.1 27942523 GAGA G

CM070412.1 27967187 T TA

CM070412.1 27984779 G GGA

CM070412.1 28139184 GATCT G

CM070412.1 28141800 T A

CM070412.1 28227722 C CAT

CM070412.1 28489657 T TTA

CM070412.1 28844400 C A

CM070412.1 28863285 A T

CM070412.1 28863355 C A

CM070412.1 28863458 A C

CM070412.1 28863463 AC A

CM070412.1 28863840 C G

CM070412.1 28864415 C T

CM070412.1 29007024 AGTGT A

CM070412.1 29166214 T TTC

CM070412.1 29362623 A C

CM070412.1 29898127 G GTA

CM070412.1 30078048 CATAT C

CM070412.1 30116967 G GAGA

CM070412.1 30220136 GTA G

CM070412.1 30384924 TC T

CM070412.1 30608702 A C

CM070412.1 30755605 TTA T

CM070412.1 30902205 A AATAT

CM070412.1 30994471 C CTA

CM070412.1 31077051 G GTA

CM070412.1 31237424 TTATA T

CM070412.1 31604755 T TC

CM070412.1 31604759 T TTTC

CM070412.1 31951065 A AAT

CM070412.1 31967469 GAGA G

CM070412.1 32620785 CAT C

CM070412.1 32655167 AAAG A

CM070412.1 32662302 C CAT

CM070412.1 33088992 C CAT

CM070412.1 33197610 G GAT

CM070412.1 33393230 CCT C

CM070412.1 33396122 TGA T

CM070412.1 33588262 C CAA

CM070412.1 33588841 C T

CM070412.1 33605956 A C

CM070412.1 33847299 TTTC T

CM070412.1 33847680 C T

CM070412.1 33847681 T C

CM070412.1 33995682 G GTATA

CM070412.1 34049860 G T

CM070412.1 34534831 GTA G

CM070412.1 34757355 CTCT C

CM070412.1 35001883 TTC T

CM070412.1 35364954 GTA G

CM070412.1 35522648 GGAA G

CM070412.1 35851751 GATAT G

CM070412.1 35951368 T C

CM070412.1 35951391 C G

CM070412.1 36204670 T TATAA

CM070412.1 36359085 C A

CM070412.1 36493363 CATAT C

CM070412.1 36686299 C CA

CM070412.1 36739776 A AAT

CM070412.1 36783518 AAG A

CM070412.1 36931404 G GAGAT

CM070412.1 37121616 GAT G

CM070412.1 37384684 G GATCT

CM070412.1 37471829 GATAT G

CM070412.1 37973929 ATC A

CM070412.1 38015924 TTTA T

CM070412.1 38136284 TTCTC T

CM070412.1 38628017 C CAAAAAAA

CM070412.1 38912069 A AATT

CM070412.1 39032892 T TTCTC

CM070412.1 39051640 T TA

CM070412.1 39090408 TATA T

CM070412.1 39246278 G GAA

CM070412.1 39290586 T TA

CM070412.1 39571701 GATAT G

CM070412.1 39661307 CAT C

CM070412.1 39887327 CAT C

CM070412.1 40005980 CAT C

CM070412.1 40160549 C CCTTCTT

CM070412.1 40325498 G GGA

CM070412.1 40406419 TTA T

CM070412.1 40819528 C CAT

CM070412.1 40996927 C CAAAAAAAAAAAAAAA

CM070412.1 41147461 C T

CM070412.1 41812112 GTGTATA G

CM070412.1 41831450 AAAG A

CM070412.1 41877263 GATA G

CM070412.1 42023348 C CAT

CM070412.1 42348081 CCT C

CM070412.1 42510758 GTTC G

CM070412.1 42604585 CA C

CM070412.1 42679802 TTC T

CM070412.1 42818953 G GTTT

CM070412.1 43045811 C CAT

CM070412.1 43492555 C G

CM070412.1 43726198 C CATAT

CM070412.1 43730655 CCACACA C

CM070412.1 43760335 GGAGA G

CM070412.1 44072180 C CATAT

CM070412.1 44226313 AT A

CM070412.1 44398558 AAT A

CM070412.1 44595650 GCT G

CM070412.1 45124784 C A

CM070412.1 45169337 C T

CM070412.1 45507362 GTTC G

CM070412.1 45517293 G GTA

CM070412.1 45519258 C CTATA

CM070412.1 45599743 T TTATA

CM070412.1 45605387 C CAT

CM070412.1 45680778 TTC T

CM070412.1 46326309 G GTC

CM070412.1 46368027 T TTAA

CM070412.1 46455153 CTT C

CM070412.1 46455156 CCTCCTCT C

CM070412.1 46479495 TTC T

CM070412.1 46557481 TTA T

CM070412.1 46596274 A G

CM070412.1 46819909 GTA G

CM070412.1 46882427 G T

CM070412.1 47441865 T TTATA

CM070412.1 47516122 T TAA

CM070412.1 47750681 GGA G

CM070412.1 48139955 G A

CM070412.1 48139958 T C

CM070412.1 48139962 AG A

CM070412.1 49049998 G A

CM070412.1 49214652 G T

CM070412.1 49530354 T TAGAAGA

CM070412.1 49560460 A ATCTC

CM070412.1 50221935 A G

CM070412.1 51311975 AGAG A

CM070412.1 51683908 A T

CM070412.1 52120403 A T

CM070412.1 52120406 C T

CM070412.1 52634567 A C

CM070412.1 52634582 G C

CM070412.1 52870693 CAG C

CM070412.1 53620123 CCT C

CM070412.1 53693694 CCT C

CM070412.1 53743850 ATC A

CM070412.1 53831961 TTC T

CM070412.1 54132635 T TC

CM070412.1 54271197 G A

CM070412.1 54275403 GC G

CM070412.1 54394136 G C

CM070412.1 54412177 T G

CM070412.1 54900162 G T

CM070412.1 54900212 A G

CM070412.1 54900316 C G

CM070412.1 54919874 A G

CM070412.1 54923249 TTC T

CM070412.1 54940545 G A

CM070412.1 54940686 C T

CM070412.1 54943504 C CTGTTGTTGTTGTAGTTGTTGTTGT

CM070412.1 54944280 C T

CM070412.1 54975297 A G

CM070412.1 54977255 T G

CM070412.1 54977340 G A

CM070412.1 54977448 C A

CM070412.1 54978838 C T

CM070412.1 54978841 T A

CM070412.1 54995017 A T

CM070412.1 55293415 CCTCT C

CM070412.1 55355341 ATC A

CM070412.1 55366426 GAGA G

CM070412.1 55391715 CAG C

CM070412.1 55753318 C CAGAG

CM070412.1 56392460 CT C

CM070412.1 57107039 C CATATAT

CM070412.1 57113285 G C

CM070412.1 57671771 T A

CM070412.1 57800084 G GAT

CM070412.1 58074797 GAT G

CM070412.1 58144476 CTG C

CM070412.1 58355417 CCT C

CM070412.1 58554376 CAT C

CM070412.1 59037087 T TTATA

CM070412.1 59090169 A C

CM070412.1 59094985 AAT A

CM070412.1 59131756 AATAT A

CM070412.1 59236717 T C

CM070412.1 59236749 G T

CM070412.1 59418825 CAAG C

CM070412.1 59519368 GAGAAGA G

CM070412.1 59702354 T C

CM070412.1 59704546 G T

CM070412.1 59745758 CATAT C

CM070412.1 59782957 AT A

JAXUCZ010000028.1 35761 C CTCTA

JAXUCZ010000028.1 109341 CATCT C

JAXUCZ010000028.1 351356 G GATAT

JAXUCZ010000028.1 442724 G A

JAXUCZ010000028.1 513538 G A

JAXUCZ010000028.1 528990 G A

JAXUCZ010000028.1 591458 CAT C

JAXUCZ010000028.1 754144 G T

JAXUCZ010000028.1 1821079 GATCT G

JAXUCZ010000028.1 1953399 G GTA

JAXUCZ010000037.1 100570 GAT G

JAXUCZ010000037.1 537053 G GTA

JAXUCZ010000037.1 649903 CATATAT C

JAXUCZ010000037.1 989850 G GAAT

JAXUCZ010000038.1 90124 A C

JAXUCZ010000038.1 175914 C CT

JAXUCZ010000038.1 189099 A G

JAXUCZ010000038.1 189700 C T

JAXUCZ010000038.1 301023 G C

JAXUCZ010000038.1 544283 C A

JAXUCZ010000038.1 544290 TGG T

JAXUCZ010000038.1 662898 G T

JAXUCZ010000038.1 727989 G A

JAXUCZ010000038.1 728043 A C

JAXUCZ010000038.1 728440 G A

JAXUCZ010000039.1 120415 T TTA

JAXUCZ010000039.1 161161 GA G

JAXUCZ010000039.1 163497 CA C

JAXUCZ010000039.1 164089 T TG

JAXUCZ010000039.1 164388 T TA

JAXUCZ010000039.1 164516 C G

JAXUCZ010000039.1 164518 A T

JAXUCZ010000039.1 164783 A G

JAXUCZ010000039.1 164890 C G

JAXUCZ010000039.1 316719 T TC

JAXUCZ010000039.1 396183 GAGA G

JAXUCZ010000039.1 790814 GAGAT G

JAXUCZ010000039.1 855283 G A

JAXUCZ010000039.1 855292 T A

JAXUCZ010000040.1 75451 T G

JAXUCZ010000040.1 129982 ACTT A

JAXUCZ010000040.1 331136 G T

JAXUCZ010000040.1 347946 C CAT

JAXUCZ010000040.1 651949 A T

JAXUCZ010000041.1 32874 G T

JAXUCZ010000041.1 637608 T TTA

JAXUCZ010000042.1 368329 AATAT A

JAXUCZ010000042.1 649817 T C

JAXUCZ010000042.1 649822 T C

JAXUCZ010000042.1 649826 T C

JAXUCZ010000043.1 36419 GAGAT G

JAXUCZ010000043.1 246470 GAGA G

JAXUCZ010000043.1 527686 GTA G

JAXUCZ010000043.1 778503 AATAG A

JAXUCZ010000044.1 91930 GAT G

JAXUCZ010000044.1 125606 CATAT C

JAXUCZ010000044.1 302408 C G

JAXUCZ010000044.1 457405 C T

JAXUCZ010000044.1 546542 C T

JAXUCZ010000044.1 717364 GGAA G

JAXUCZ010000045.1 6101 A T

JAXUCZ010000045.1 6110 C T

JAXUCZ010000045.1 15898 C T

JAXUCZ010000045.1 153662 T A

JAXUCZ010000045.1 435894 AATATATATATATATAT A

JAXUCZ010000046.1 51376 CAT C

JAXUCZ010000046.1 619080 C CAT

JAXUCZ010000029.1 239499 TTTC T

JAXUCZ010000029.1 419617 A AT

JAXUCZ010000029.1 557298 TTTC T

JAXUCZ010000029.1 580918 G A

JAXUCZ010000029.1 581876 G A

JAXUCZ010000029.1 689676 G GAT

JAXUCZ010000029.1 937940 A AATAT

JAXUCZ010000029.1 953361 TAC T

JAXUCZ010000029.1 1172821 CAT C

JAXUCZ010000029.1 1186839 G GAT

JAXUCZ010000029.1 1472323 T TTA

JAXUCZ010000029.1 1902628 C CTT

JAXUCZ010000047.1 28090 CT C

JAXUCZ010000047.1 160597 T A

JAXUCZ010000047.1 164507 G A

JAXUCZ010000047.1 164508 A T

JAXUCZ010000047.1 164529 C T

JAXUCZ010000047.1 250048 CATATAT C

JAXUCZ010000048.1 118568 T TAC

JAXUCZ010000048.1 207807 A AT

JAXUCZ010000048.1 230710 C A

JAXUCZ010000048.1 364990 G GA

JAXUCZ010000048.1 448348 CAG C

JAXUCZ010000048.1 497137 AAT A

JAXUCZ010000049.1 226699 A C

JAXUCZ010000049.1 244496 C CATAT

JAXUCZ010000049.1 617081 CA C

JAXUCZ010000050.1 10386 A T

JAXUCZ010000050.1 161441 G GT

JAXUCZ010000050.1 215250 T TAC

JAXUCZ010000050.1 502862 C CAT

JAXUCZ010000050.1 508009 C T

JAXUCZ010000051.1 138396 G GTTTTT

JAXUCZ010000051.1 319037 TATATA T

JAXUCZ010000052.1 36013 C CAT

JAXUCZ010000053.1 41987 CAT C

JAXUCZ010000053.1 67016 GA G

JAXUCZ010000053.1 279420 A T

JAXUCZ010000053.1 387668 A AAT

JAXUCZ010000054.1 64544 T A

JAXUCZ010000054.1 100131 C A

JAXUCZ010000054.1 143404 T TTATA

JAXUCZ010000054.1 240097 T G

JAXUCZ010000055.1 18619 CATAT C

JAXUCZ010000055.1 80687 G T

JAXUCZ010000055.1 83626 G A

JAXUCZ010000055.1 95629 AT A

JAXUCZ010000055.1 104516 C T

JAXUCZ010000055.1 104863 G A

JAXUCZ010000055.1 490647 T G

JAXUCZ010000056.1 143021 C A

JAXUCZ010000030.1 61702 G GCA

JAXUCZ010000030.1 264195 G GTTTTTTTTTTTTTTTTTTTTTTTTTTTTTT

JAXUCZ010000030.1 520119 CCT C

JAXUCZ010000030.1 625394 T C

JAXUCZ010000030.1 757180 C CATAT

JAXUCZ010000030.1 797603 AAT A

JAXUCZ010000030.1 1132685 G A

JAXUCZ010000030.1 1233524 GAT G

JAXUCZ010000030.1 1290785 CTCT C

JAXUCZ010000030.1 1439186 C A

JAXUCZ010000030.1 1491004 C G

JAXUCZ010000030.1 1558790 G T

JAXUCZ010000030.1 1608834 GATA G

JAXUCZ010000030.1 1633928 G C

JAXUCZ010000030.1 1633932 T A

JAXUCZ010000057.1 78617 C T

JAXUCZ010000057.1 306240 TA T

JAXUCZ010000059.1 287120 G A

JAXUCZ010000059.1 287123 C T

JAXUCZ010000059.1 287129 G A

JAXUCZ010000059.1 287131 G A

JAXUCZ010000059.1 287132 A G

JAXUCZ010000059.1 287140 CCG C

JAXUCZ010000059.1 287143 A ACT

JAXUCZ010000060.1 128940 TA T

JAXUCZ010000060.1 330819 A G

JAXUCZ010000061.1 18512 CTGATATATATAT C

JAXUCZ010000061.1 18534 T C

JAXUCZ010000061.1 18536 T C

JAXUCZ010000061.1 18538 T C

JAXUCZ010000061.1 33964 G GAGA

JAXUCZ010000061.1 34231 GAGA G

JAXUCZ010000061.1 91757 A G

JAXUCZ010000061.1 318176 GAGAAGA G

JAXUCZ010000062.1 30886 AAAG A

JAXUCZ010000062.1 116355 C A

JAXUCZ010000062.1 116359 C T

JAXUCZ010000062.1 242537 AATAT A

JAXUCZ010000062.1 326784 T C

JAXUCZ010000064.1 2968 GAGA G

JAXUCZ010000064.1 196134 G GA

JAXUCZ010000065.1 77884 GTATA G

JAXUCZ010000065.1 252562 CATATATATATAT C

JAXUCZ010000066.1 4238 A AT

JAXUCZ010000066.1 16722 T A

JAXUCZ010000066.1 91390 C CA

JAXUCZ010000066.1 278421 C CTA

JAXUCZ010000031.1 121309 TGAA T

JAXUCZ010000031.1 170260 C CTAATA

JAXUCZ010000031.1 246287 A AAC

JAXUCZ010000031.1 832633 AGT A

JAXUCZ010000031.1 1124490 A AT

JAXUCZ010000031.1 1370568 CATATATATATAT C

JAXUCZ010000031.1 1399818 AT A

JAXUCZ010000031.1 1461181 T G

JAXUCZ010000031.1 1461182 ATTATATAT A

JAXUCZ010000031.1 1546459 CATAT C

JAXUCZ010000067.1 122936 C CAT

JAXUCZ010000067.1 281909 G A

JAXUCZ010000069.1 164279 T C

JAXUCZ010000069.1 184109 TC T

JAXUCZ010000071.1 91885 A T

JAXUCZ010000071.1 92107 G T

JAXUCZ010000071.1 92167 C T

JAXUCZ010000073.1 55469 G A

JAXUCZ010000073.1 55560 T C

JAXUCZ010000032.1 19081 C CTT

JAXUCZ010000032.1 468163 AG A

JAXUCZ010000032.1 1193761 GTC G

JAXUCZ010000032.1 1261784 G A

JAXUCZ010000032.1 1372580 CTCT C

JAXUCZ010000033.1 118 TA T

JAXUCZ010000033.1 11543 ATAT A

JAXUCZ010000033.1 468935 C A

JAXUCZ010000034.1 34636 A AATAT

JAXUCZ010000034.1 234044 T A

JAXUCZ010000034.1 236098 G T

JAXUCZ010000034.1 236188 C T

JAXUCZ010000034.1 236364 G T

JAXUCZ010000034.1 358164 T A

JAXUCZ010000034.1 490336 T TAC

JAXUCZ010000034.1 828674 AAT A

JAXUCZ010000034.1 857063 C CTATA

JAXUCZ010000034.1 880333 TTTA T

JAXUCZ010000034.1 915203 C CATAT

JAXUCZ010000035.1 25727 CATATAT C

JAXUCZ010000035.1 65109 C G

JAXUCZ010000035.1 471307 G GTA

JAXUCZ010000036.1 964771 C T

JAXUCZ010000074.1 1280 G GA

JAXUCZ010000074.1 50420 C CAT

CM070413.1 3130 A G

CM070413.1 5175 GAT G
